# Supplementary material for: Proteomic and transcriptomic profiling reveal different aspects of aging in the kidney
Source: bioRxiv preprint, doi:10.1101/2020.08.27.270504, version 1 (2020-08-27)
Supplement: Supplemental Table 1 [file 270504_file02.csv]

gene.id	symbol	fc.age.mrna	se.age.mrna	z.age.mrna	p.age.mrna	padj.age.mrna	q.age.mrna	fc.sex.mrna	se.sex.mrna	z.sex.mrna	p.sex.mrna	padj.sex.mrna	q.sex.mrna
ENSMUSG00000052477	C130026I21Rik	1.8545880674343855	0.17598801089591806	10.538150059160659	5.532596901133717e-25	1.2310581364712633e-20	1.2310581364712633e-20	-0.3022513842070013	0.14459938049899132	-2.0902674905243437	0.04053046587451526	1	0.06435303240857992
ENSMUSG00000094230	Gm21847	1.6748713336958725	0.19061563692697817	8.78664185529275	2.1267020939391176e-18	4.731912159014537e-14	2.3660624146119653e-14	-0.623100813327133	0.1563797768268492	-3.984535762684062	6.441787944236307e-5	0.8429367478202802	1.5634937497120688e-4
ENSMUSG00000032053	Pou2af1	2.489890613357515	0.27583576449924135	9.026714203931169	1.4346447435482897e-17	3.1919410899205897e-13	1.0640760062897665e-13	-0.06295673355215617	0.22596751289060185	-0.2786096671455403	0.7902553063663089	1	0.8353033500525742
ENSMUSG00000024353	Mzb1	1.791564737747741	0.20782283557743642	8.6206346514803	2.0955603587496286e-17	4.662202686146174e-13	1.1657078385634496e-13	-0.11346487770700192	0.17084431087314503	-0.6641419730461592	0.5187100900452288	1	0.5965380511472187
ENSMUSG00000076672	Ighv3-6	3.360886687327499	0.38015155840994297	8.840912559677657	1.4258135781555525e-16	3.1720074673226577e-12	6.34515558550784e-13	-0.44608124058809207	0.3122172934629535	-1.4287525064367466	0.17421581065152683	1	0.23588146542577118
ENSMUSG00000076609	Igkc	2.33699722024494	0.275817862378389	8.47297270776053	5.642617422835205e-16	1.2552566718839197e-11	2.092564671258436e-12	-0.018305740808747813	0.22645016911605223	-0.08083783235934083	0.9391238798568778	1	0.9555452789558052
ENSMUSG00000014453	Blk	1.8759041700059018	0.23094914137465591	8.122585599756473	1.1500616005194465e-15	2.5583120303555085e-11	3.0132641457527866e-12	-0.3128059453060479	0.18952790637035638	-1.6504479540590395	0.10816966812137145	1	0.15511266903194149
ENSMUSG00000003379	Cd79a	1.9347004504101772	0.23261468459659806	8.317189663951558	1.1695564304082804e-15	2.6015613238001788e-11	3.0132641457527866e-12	-0.02039962113395925	0.1908598079487803	-0.10688274997863223	0.9173620476183049	1	0.9381690993876205
ENSMUSG00000079455	Gm16026	2.0698149521967437	0.25574964505253034	8.093129324858335	1.218793641264441e-15	2.710962696264496e-11	3.0132641457527866e-12	-0.2994596498678523	0.20884990964019715	-1.4338509908084518	0.15771146942989875	1	0.2164058896327502
ENSMUSG00000076612	Ighg2c	3.501375082032149	0.3991799658325038	8.771419865047356	9.261442600789496e-15	2.0599300632675996e-10	1.811684553184551e-11	-1.0342145318373306	0.3281215012793998	-3.151925514800943	0.004722587043058366	1	0.008930252765793466
ENSMUSG00000070933	Speer4d	1.686377217872626	0.21667576356745147	7.782952694419163	9.441636083763366e-15	2.0999142813898101e-10	1.811684553184551e-11	-0.3855768717013777	0.17735751928411048	-2.1740091610309396	0.02920166991948201	1	0.04781421375188466
ENSMUSG00000051998	Lax1	1.662813004696365	0.2129145816603318	7.809765736707944	1.0131503348356822e-14	2.2532463446745574e-10	1.811684553184551e-11	-0.192192600401473	0.17506965358958673	-1.0978064813678523	0.28625085846113063	1	0.3618959006601487
ENSMUSG00000021356	Irf4	1.5559039236937033	0.19917607280944147	7.81170098268927	1.0584647517594339e-14	2.353919761437805e-10	1.811684553184551e-11	-0.15325816424802138	0.16381620277447925	-0.9355494856574548	0.3604413186774891	1	0.4405239910959469
ENSMUSG00000090252	Gm16028	2.25396817502198	0.2881786255727649	7.821427319747052	1.38716715264319e-14	3.084782314047926e-10	2.2047040223902587e-11	-0.18707754785354241	0.2356573244895968	-0.7938541620071776	0.43988570373933217	1	0.5206328081863766
ENSMUSG00000010142	Tnfrsf13b	1.3724272735759484	0.17992048937273733	7.627965432734684	2.3056108188811067e-14	5.126986777945917e-10	3.420143088728234e-11	0.1445161509964856	0.14799302748236381	0.9765064844943958	0.3357758576171507	1	0.41489052686801536
ENSMUSG00000017002	Slpi	2.6638233384980294	0.3251960603515439	8.19143791477172	5.2371153771159254e-14	1.1645249752554972e-9	7.283190891012903e-11	-0.006827497368134603	0.2658118588530011	-0.025685450595002744	0.980780743518519	1	0.9857424600944291
ENSMUSG00000095127	Ighv1-82	3.2460604516454086	0.399320168020771	8.128966958354484	1.1679998617908658e-13	2.59704769269199e-9	1.5287744073357974e-10	-0.942738529381785	0.32762055569570026	-2.877531684115136	0.007041647285690493	1	0.012910653737137371
ENSMUSG00000040592	Cd79b	1.411977541913824	0.1874064607626945	7.534305573924457	1.3255703801735263e-13	2.947273183277818e-9	1.6241760955892892e-10	-0.15861371910005287	0.15394154274492897	-1.0303503282597692	0.3136135680250029	1	0.3915572003254841
ENSMUSG00000076613	Ighg2b	2.8338884032574487	0.3460133279187464	8.190113428009123	1.3868745591747108e-13	3.0834382074131344e-9	1.6241760955892892e-10	-0.6215888917415033	0.2830197800462011	-2.196273672603495	0.04253907820230408	1	0.06719223603886335
ENSMUSG00000067149	Jchain	2.0154108986639314	0.261672020419489	7.702049670549439	1.6890285227872837e-13	3.755048211860689e-9	1.8791286830269925e-10	0.19101935816739893	0.21462555387810642	0.890012185016355	0.3853477423408426	1	0.46572009205508064
ENSMUSG00000044303	Cdkn2a	2.353669140260828	0.3262544776689478	7.214212528445691	2.7278007381145447e-13	6.064173820902444e-9	2.8902997249422257e-10	-0.21066059256734512	0.2605844563314187	-0.8084158032028627	0.42806961334306337	1	0.509112029851756
ENSMUSG00000034457	Eda2r	1.0967677587272326	0.14618023315263573	7.502845870973747	3.635407322546262e-13	8.08151047802034e-9	3.676884015180767e-10	0.5374480069010551	0.12009414208195082	4.4752225011467	8.846935559298177e-6	0.12306087362983764	2.3597837824256022e-5
ENSMUSG00000076564	Igkv12-46	2.6140795155823473	0.3362764297960794	7.773603154903081	4.038782065439926e-13	8.977808653266411e-9	3.9072582494827734e-10	-0.02864249991613869	0.2765038718317107	-0.10358806090632774	0.9220037734722033	1	0.9418879836670617
ENSMUSG00000026442	Nfasc	1.6072563013842167	0.21817777547409337	7.366727880012984	6.040319073933007e-13	1.342642123753829e-8	5.60013082142014e-10	-0.47868468266941694	0.1789383145768946	-2.6751379870838856	0.008487646898240773	1	0.015356857304663803
ENSMUSG00000076550	Igkv4-63	3.4122834642140254	0.4389495403074549	7.773748804529896	7.102511656025168e-13	1.578675265784714e-8	6.274342524385972e-10	0.1186551637691736	0.3579569525979199	0.3314788633326384	0.7548770971189701	1	0.8067990115569812
ENSMUSG00000106334	Gm43549	1.3564405771865777	0.1818771413879765	7.45800471040529	7.331486478541876e-13	1.6294961847207173e-8	6.274342524385972e-10	2.1548079151626016	0.148848371490607	14.476529998842343	1.732466962209715e-43	3.675601907024131e-39	3.720957758313549e-42
ENSMUSG00000105547	Iglc3	2.3615530224212566	0.31992461181683896	7.381592210146298	8.701193574461433e-13	1.9338402719240534e-8	7.170750304642272e-10	0.15020116106706838	0.26256459018582573	0.5720541408906891	0.5914870023430105	1	0.6642027397998651
ENSMUSG00000024673	Ms4a1	2.109257311480854	0.2732240236916937	7.719882325797758	1.1975284221043601e-12	2.66138716528473e-8	9.516501757230042e-10	-0.009207862569216862	0.22093131543098657	-0.04167748945528353	0.9677977717633048	1	0.9767883082423613
ENSMUSG00000053113	Socs3	1.0750893995606372	0.15113873933481398	7.113261658078395	1.2580978232448195e-12	2.7958707925969623e-8	9.637171386860337e-10	-0.24677053960603335	0.12357637222223405	-1.9969071366025584	0.0484372219577991	1	0.07554332556129444
ENSMUSG00000023992	Trem2	1.1476274675249791	0.16252965508219028	7.061034289063314	1.3186282445754216e-12	2.930255685095502e-8	9.637171386860337e-10	0.09840871540274565	0.13357775237007646	0.7367148619936711	0.467561228928119	1	0.5478517590773868
ENSMUSG00000095351	Igkv3-2	3.028724807370371	0.3909707382754427	7.746678998868209	1.37874413229672e-12	3.063707336376541e-8	9.637171386860337e-10	-1.0504416295817467	0.32139632467994184	-3.2683685186126965	0.003611169298213232	1	0.006952078911104225
ENSMUSG00000008193	Spib	1.7229099393215541	0.2383194065024659	7.229415197892107	1.3859578642736542e-12	3.0795983744160595e-8	9.637171386860337e-10	0.20240706724739682	0.195870393467582	1.0333724442172865	0.3185590922745404	1	0.39701234245551686
ENSMUSG00000041420	Meis3	0.5678430135830084	0.08070834579291543	7.035740951004024	2.2122279904300347e-12	4.9153493719364944e-8	1.4916450004563243e-9	-0.16671862168067264	0.06639007185061414	-2.511198090820117	0.012265023612537472	1	0.021548285858868636
ENSMUSG00000056498	Tmem154	0.9525916537970869	0.13628858374306002	6.989519060473721	2.8462974782134293e-12	6.323903737094597e-8	1.8627342702272654e-9	-0.12023147666053281	0.1121758758980182	-1.0718122385764846	0.2881790043471107	1	0.36385808464663
ENSMUSG00000030724	Cd19	1.8970127706198192	0.26081357552068163	7.273443365947002	3.454958139685585e-12	7.675880498939464e-8	2.1964649590326845e-9	0.03831301862393554	0.21394842302920708	0.17907595709974106	0.8646217864397799	1	0.8969926972245218
ENSMUSG00000089652	Gm16025	2.175772092590932	0.3131229092858248	6.948619944651971	3.664058126049204e-12	8.140071532830911e-8	2.2646932600755787e-9	-0.6409799781048124	0.255158341798032	-2.512087096929693	0.014380768016336233	1	0.024969681555325595
ENSMUSG00000105646	Gm30211	2.3511395846684624	0.32591635061395585	7.213935662446589	4.658956430717602e-12	1.0349871710839152e-7	2.801795663240469e-9	-0.18928520222569156	0.2655752188079549	-0.7127366893466409	0.4883103142705806	1	0.567472335239708
ENSMUSG00000079457	Gm7609	0.9461835406737523	0.13670390926350615	6.921408069244888	8.777568658388514e-12	1.9498491017744246e-7	5.1397284267842856e-9	-0.3254746575251834	0.11226442819684285	-2.8991788650497625	0.0037767961970401618	1	0.0072508621380794345
ENSMUSG00000094420	Igkv10-96	2.3056697373654274	0.31877793920825187	7.23283970996241	9.981774081504769e-12	2.2172514767246542e-7	5.694986027886221e-9	-0.1992270631410383	0.2621352749724919	-0.7600162288800884	0.4773551486636003	1	0.5570395119002396
ENSMUSG00000005087	Cd44	1.145790077987276	0.16988751426231372	6.74440427810443	1.440426381854886e-11	3.199475079376073e-7	8.012731855663267e-9	-0.16502670563812696	0.1393939072550056	-1.183887509058979	0.24250449148852488	1	0.3140111406023724
ENSMUSG00000095642	Ighv14-3	2.3306255772944904	0.32613235677616453	7.146256815278455	1.7323444026352393e-11	3.84771015269313e-7	9.401559830008954e-9	0.3566358752982831	0.26768103369356794	1.3323165648954705	0.2319625150294885	1	0.30199508056410673
ENSMUSG00000076555	Igkv4-57-1	2.8532427166194685	0.38465021736444194	7.417759272747598	1.9975054631921268e-11	4.4364596337497137e-7	1.0435345707348353e-8	-0.17339151229430055	0.3162261666776717	-0.5483148789234698	0.6072693675644925	1	0.6786033897989917
ENSMUSG00000027994	Mcub	0.725391057043638	0.10797904989007484	6.717887014028211	2.0166278612915337e-11	4.4787288171423673e-7	1.0435345707348353e-8	-0.35160377173579604	0.08879210233069851	-3.9598541143476726	7.466441993541912e-5	0.9725040696588341	1.8005397290376187e-4
ENSMUSG00000068105	Tnfrsf13c	2.233752019075778	0.3202450055163314	6.975134601941089	2.56523346743257e-11	5.696870484474252e-7	1.2972502246327754e-8	0.059172657194596454	0.26195583505491665	0.22588791420581047	0.8320120087502041	1	0.8701809262844085
ENSMUSG00000026249	Serpine2	0.6429740519947112	0.09553485673562377	6.730256096725313	2.851664618972543e-11	6.332691619352326e-7	1.4100530985946234e-8	0.39964079425099147	0.07860410017689898	5.084223257458549	4.649819840055734e-7	0.0069291615256510545	1.4076617858650358e-6
ENSMUSG00000041202	Pla2g2d	2.129298013365094	0.2997156438330185	7.104393972012339	3.5467607337183345e-11	7.875936885294934e-7	1.7156298496949274e-8	-0.2163003694638017	0.2454779273828735	-0.8811397903259817	0.4033857715312578	1	0.4838536461038443
ENSMUSG00000030468	Siglecg	1.5106170904278216	0.22412158098209561	6.740167920502489	3.723194722821859e-11	8.267353882025938e-7	1.7626554420746636e-8	-0.004906492699403897	0.18426102722819385	-0.0266279460893679	0.9796566958756372	1	0.9848796430636968
ENSMUSG00000037337	Map4k1	1.0435886278372535	0.15757057857417708	6.622991660502023	3.9878970477247304e-11	8.854726604767991e-7	1.821704234840257e-8	0.031115157886322152	0.12964937830243056	0.23999465553734037	0.8120669781112002	1	0.8537350498441917
ENSMUSG00000094694	Ighv1-9	2.439724609710567	0.3501343739910865	6.967966560668722	4.0116627345814834e-11	8.907094769591267e-7	1.821704234840257e-8	-0.36272000323776443	0.2876046995943783	-1.2611755084298852	0.2457229650514539	1	0.3175318947302341
ENSMUSG00000025289	Prdx4	0.26801194315236304	0.04044714279545002	6.626226839007087	4.4837748694489426e-11	9.954876965150541e-7	1.9953694924021684e-8	0.07190356561060023	0.03305847402378995	2.175041883628872	0.02996899245020837	1	0.04894957432354008
ENSMUSG00000076569	Igkv5-39	2.8159411106014036	0.38625539442088397	7.290360604085202	4.986059364262144e-11	1.1069550394598385e-6	2.156561445445792e-8	-0.3042637428234466	0.31732445638113466	-0.9588411378478784	0.38569004646509786	1	0.4661084740329618
ENSMUSG00000096515	Igkv14-100	3.392282010808317	0.4598438096800259	7.377030938328334	5.03982720611124e-11	1.1188416397566953e-6	2.156561445445792e-8	0.19159476125772612	0.37791361639641086	0.5069803069936322	0.6481382293298605	1	0.7147959823958528
ENSMUSG00000026822	Lcn2	1.6580381349746878	0.24652820536009887	6.725551474131831	5.250134106267005e-11	1.1654772702502125e-6	2.1773930747530016e-8	-0.19289019216018635	0.2003540834163483	-0.9627464979555644	0.3462608689380427	1	0.4258359915293422
ENSMUSG00000076615	Ighg3	3.3205726898973755	0.41849680460396566	7.934523402250871	5.2842221040250813e-11	1.1729916226514875e-6	2.1773930747530016e-8	-1.340423811394463	0.3376917627479487	-3.9693707672548357	3.22931705733436e-4	1	7.181962403073147e-4
ENSMUSG00000002020	Ltbp2	1.351520979315403	0.20277650389389543	6.665076837613288	5.94698910113933e-11	1.3200531707798971e-6	2.4059355361718407e-8	-0.20175034972900563	0.16679587406007157	-1.2095643904017985	0.23698151129397407	1	0.30757557208365705
ENSMUSG00000041272	Tox	0.7910554811560646	0.12213886523366853	6.476689296586031	6.062306411102102e-11	1.3455895310082225e-6	2.4087924991684442e-8	-0.13454776371336905	0.10035808535712473	-1.3406768695773756	0.18132019905456562	1	0.24429644257724129
ENSMUSG00000052271	Bhlha15	1.0909037384324034	0.17114834845335675	6.374024337896013	8.769091991878588e-11	1.9462999675974525e-6	3.42317659493492e-8	-1.0531317111944791	0.140344702499326	-7.503893573749509	2.0501653168345628e-13	3.626537428948658e-9	9.99742022022482e-13
ENSMUSG00000028362	Tnfsf8	1.625088599275009	0.24415775157896796	6.655895988415533	9.321622725654618e-11	2.068840947731786e-6	3.576128056354153e-8	-0.4042144090536098	0.2006845939189306	-2.0141775766648933	0.047957163708097585	1	0.07484708211186641
ENSMUSG00000024112	Cacna1h	0.9537090533652719	0.14787131360966993	6.449588024102768	1.0074975691385892e-10	2.235939355189271e-6	3.799631934051313e-8	-0.7367714816178584	0.12165309534367169	-6.056331567531995	2.0754504162135337e-9	3.3609844040161964e-5	7.623117730466712e-9
ENSMUSG00000025757	Hspa4l	-0.2693526344071982	0.041934225789650115	-6.42321705802609	1.1202887986265719e-10	2.4861449019120884e-6	4.154591009706642e-8	0.026573295099609057	0.034342060444553485	0.7737827828505693	0.43997075030254923	1	0.52070576910707
ENSMUSG00000063646	Jakmip1	1.4935930705824265	0.23248119742152135	6.424575781388164	1.2010869405969488e-10	2.6653320298786893e-6	4.381210740200444e-8	-0.2141113799949572	0.1909121522857564	-1.1215178155577876	0.2759009143424444	1	0.35058701087171495
ENSMUSG00000004609	Cd33	0.6580012047012578	0.10333237061712086	6.3678129203031695	1.29274047532384e-10	2.8685911147436006e-6	4.639478760714639e-8	0.17696405326830786	0.08484316149733671	2.08577863136162	0.037536586726330354	1	0.06012284705208586
ENSMUSG00000076617	Ighm	2.2151290612583345	0.3226544397650571	6.865329554650774	1.4230654714634715e-10	3.1576399746302967e-6	5.02613171516408e-8	-0.6082783009343594	0.26521560426267055	-2.293523801608288	0.035674205640708126	1	0.05740845806837322
ENSMUSG00000053046	Brsk2	0.6551117744004765	0.10237563701349271	6.399098394026455	1.5747673450402133e-10	3.4940937851752252e-6	5.475023155389029e-8	-0.48855316181540204	0.08440740858908413	-5.7880365003716445	5.9706963459903124e-9	9.541769830527118e-5	2.118545118715204e-8
ENSMUSG00000038421	Fcrla	1.678908333221101	0.2562962978350447	6.550653861967472	1.6746006640283314e-10	3.7154364932796587e-6	5.732544519276062e-8	0.017640058720046294	0.21048555620996642	0.08380650453017185	0.9352668498041132	1	0.9524312437066966
ENSMUSG00000031380	Vegfd	0.4522612732177124	0.07076919312803326	6.390651825003804	1.8432607786959265e-10	4.089458363614783e-6	6.214302361630766e-8	-0.567870948415995	0.05814777285567913	-9.765996538258344	1.1400634856482156e-22	2.2334983747334193e-18	9.533090048537558e-22
ENSMUSG00000020592	Sdc1	0.42988492186786476	0.06775228214088573	6.344951170411525	2.010760584749088e-10	4.460872357265852e-6	6.677825936007755e-8	-0.17191316038003884	0.05557782328371273	-3.0931970743521107	0.0020090821126293023	1	0.004016900538064032
ENSMUSG00000047880	Cxcr5	1.7254690570368525	0.260235746579756	6.630407542831698	2.2509998678196122e-10	4.993618106771028e-6	7.365735008655028e-8	-0.0974912032267652	0.21305276732604225	-0.4575918184511114	0.6618088890048439	1	0.726165471139937
ENSMUSG00000054342	Kcnn4	1.0982414387561106	0.17574892357288485	6.248922704215931	2.320785260644406e-10	5.148197943687486e-6	7.484027947043287e-8	-0.11313590992253018	0.14426339756419776	-0.7842315641580829	0.4393364353437541	1	0.5200380371759694
ENSMUSG00000089844	A530032D15Rik	1.7696364612060278	0.2676213732881973	6.612463120799899	2.3599859483127455e-10	5.234920830547332e-6	7.5017210479867e-8	-0.3542955884424956	0.2196417927257285	-1.6130609026894631	0.11543992538597223	1	0.1643202264434025
ENSMUSG00000076598	Igkv3-7	2.8639498066416427	0.39338496474025864	7.280272667595801	2.4268212184068854e-10	5.382932144548313e-6	7.605520976165015e-8	-0.0013147914780005424	0.3229494631729022	-0.004071198834278982	0.9973467722576618	1	0.9981991287111026
ENSMUSG00000045826	Ptprcap	1.2391149228373521	0.19388018593840411	6.391137479262682	2.6992319116755e-10	5.986896380096259e-6	8.341751287040493e-8	-0.04396704052025875	0.1594323644557775	-0.2757723669867174	0.7877875020956734	1	0.833169813638045
ENSMUSG00000094797	Igkv6-15	2.160248097189381	0.31401314900207966	6.879482926286868	2.751098144490966e-10	6.101660574666514e-6	8.385573262064177e-8	0.09495630797409696	0.2566201074735359	0.3700267641104054	0.7152856741518534	1	0.7729128562331434
ENSMUSG00000024349	Tmem173	0.641568921646204	0.10265482039555299	6.249769072451632	2.868190259428096e-10	6.361072357359631e-6	8.624338035477643e-8	-0.27601951189072993	0.08408039903992001	-3.2828044947750583	0.0010905401404556995	1	0.0022597884769305055
ENSMUSG00000014030	Pax5	1.6757619658963747	0.2571687614730486	6.516195654159944	3.6765785618038953e-10	8.153548276512498e-6	1.0907673277159796e-7	0.12220129133343222	0.21093500602701037	0.5793314899935778	0.579758498819563	1	0.6532411564327575
ENSMUSG00000015314	Slamf6	1.71991699981573	0.26724254291048466	6.4357904287411	3.7332893468481627e-10	8.278942455570485e-6	1.0930187007462957e-7	-0.17933956498271947	0.21960408286237798	-0.8166495023460398	0.4294782110499666	1	0.5104053663447529
ENSMUSG00000095753	Igkv4-53	2.454747574884764	0.35168780117795384	6.97990537818701	4.133067415546115e-10	9.16507699397351e-6	1.1943491306924234e-7	0.204027171434397	0.2873466988520823	0.7100383343517171	0.5125106420447857	1	0.5907824843878426
ENSMUSG00000095589	Ighv1-55	2.9471259858181864	0.42110955092756025	6.99847813787808	4.3688398823540857e-10	9.687465555131949e-6	1.2462955925930867e-7	-0.5868885189505879	0.3462391880247274	-1.6950378213937876	0.1150793849242595	1	0.16383846656533993
ENSMUSG00000059994	Fcrl1	1.8113925673310913	0.2775128099247701	6.527239473457585	4.45020356088654e-10	9.867436355553726e-6	1.2534364485226128e-7	-0.051078678371102706	0.22736947938267243	-0.22465054900853748	0.8298659474768157	1	0.8685896419072687
ENSMUSG00000069516	Lyz2	1.0127022477457868	0.16364014348610326	6.188593007630723	4.5903976475196564e-10	1.0177829664080582e-5	1.2767617256869983e-7	-0.08800123329528102	0.1343766602427771	-0.6548848076465807	0.5153386206338377	1	0.5932765600760664
ENSMUSG00000031298	Adgrg2	0.5506907367725975	0.08855355515219648	6.218730979531296	5.424989969934083e-10	1.2027745262340856e-5	1.4902648372963368e-7	-0.6275279323284495	0.07289661020900892	-8.608465202006013	9.127790036762287e-18	1.7130123561991785e-13	5.827904049009975e-17
ENSMUSG00000018168	Ikzf3	1.3875132018913932	0.2212901464351748	6.270108381431498	6.753656074526576e-10	1.497285551722542e-5	1.8326292843206203e-7	-0.20359777192289433	0.18199277060047808	-1.1187135140100972	0.27671889237985475	1	0.35138230179445007
ENSMUSG00000095285	Ighv5-9	2.5064996902616588	0.37539130055151293	6.677031903987091	8.041293259969678e-10	1.782674302802678e-5	2.155744775031148e-7	-0.28958726268877594	0.30804741050563544	-0.9400736796113344	0.3938757782666382	1	0.4744805339294552
ENSMUSG00000004552	Ctse	0.8626748402407196	0.1413155907278316	6.104597771538161	8.468928315985125e-10	1.8773920290875825e-5	2.2433586185593458e-7	-0.01296670346226706	0.1160299036977566	-0.11175311750704973	0.911914951881661	1	0.934286720764646
ENSMUSG00000094335	Igkv1-117	2.002043434283606	0.29816628761321723	6.714519774551664	8.679031952651424e-10	1.9238810129442413e-5	2.2602459363878084e-7	0.38800497121784583	0.24231141229344758	1.6012657742589451	0.1256635084595465	1	0.17717264774638
ENSMUSG00000095079	Igha	1.776255820047788	0.27539164962306445	6.449926214099064	8.735838862493888e-10	1.936386042260395e-5	2.2602459363878084e-7	0.6367796410168198	0.22552665981998504	2.8235226891804994	0.0056714647319291945	1	0.010577131988111348
ENSMUSG00000093955	Ighv1-34	2.3406291057845974	0.35206569444701163	6.64827372476894	9.240662057116724e-10	2.048192744959922e-5	2.363378981987405e-7	-0.4396714140210237	0.2884390050382904	-1.5243133083289382	0.1430797533654618	1	0.19869360245490175
ENSMUSG00000096490	Igkv10-94	2.439120974369227	0.36404558740539167	6.700042683536459	1.0073052386620265e-9	2.2325913309705154e-5	2.5459961915305177e-7	-0.14579795107628976	0.2993185467988409	-0.48709962224383735	0.6649135353365071	1	0.7286019439954997
ENSMUSG00000045569	Mc2r	1.5158300138869665	0.24990357523273013	6.065659574799219	1.0183527079511756e-9	2.2569751066321905e-5	2.5459961915305177e-7	-0.01174241943327748	0.20421915447867084	-0.05749910904906762	0.9541616274800554	1	0.9667175290528509
ENSMUSG00000074785	Plxnc1	0.7165138975092297	0.117454626565453	6.1003463078565385	1.0556368564666678e-9	2.339502401301429e-5	2.609886188137758e-7	-0.08501174737099552	0.09668666109234697	-0.8792500062630092	0.3793312361062647	1	0.4598210455048611
ENSMUSG00000029204	Rhoh	1.2329085206950787	0.20151646158849829	6.1181528842676345	1.1261465064458324e-9	2.4956532729346093e-5	2.7536138368050784e-7	-0.1296901529831732	0.16581932859544518	-0.7821172240998666	0.4438529927844749	1	0.5245471076294534
ENSMUSG00000064115	Cadm2	0.6485770974588989	0.10519040337127183	6.165743990635075	1.1679744375947527e-9	2.588231353709972e-5	2.824847740317483e-7	-0.29230242736502277	0.08640499856431809	-3.382934230910714	7.237353451283691e-4	1	0.0015364788822107948
ENSMUSG00000026728	Vim	0.433707066227513	0.07169887612713728	6.049007873686312	1.2040566530335433e-9	2.6680691374570284e-5	2.880802643725739e-7	-0.3748294181741401	0.05888835668888409	-6.3650853793461994	2.27232630740941e-10	3.782059906052222e-6	9.015965168717329e-10
ENSMUSG00000038147	Cd84	0.9829843268115341	0.15996161539439724	6.145126281626459	1.3125626427056255e-9	2.908376303707125e-5	3.107003336472646e-7	-0.21743366608850279	0.13160661940092072	-1.6521484031598916	0.10138497502195146	1	0.14659283119198402
ENSMUSG00000018819	Lsp1	0.6950089273044951	0.11498433337828771	6.044379324424839	1.3763503741655894e-9	3.0495795240386964e-5	3.223702334269319e-7	-0.06486702263103092	0.09449774807377957	-0.6864398777036007	0.49533757389924804	1	0.5742591755761043
ENSMUSG00000094872	Igkv9-120	2.5044528726734225	0.3688820995678905	6.789304429808727	1.4036713843030028e-9	3.109974319061733e-5	3.2534470804298036e-7	0.21119836824938282	0.3006043591162277	0.7025791936960025	0.49733458347671666	1	0.576094113016837
ENSMUSG00000035273	Hpse	0.9680852880389	0.15837378405758362	6.112661219781873	1.6319671996459483e-9	3.615623330815599e-5	3.743598160754845e-7	-0.3561869865827995	0.1303433085234356	-2.7326833315632575	0.006865777748392318	1	0.012614565959657077
ENSMUSG00000067341	H2-Eb2	1.9099628799331378	0.3010989649893978	6.343306028967555	1.7536878697185892e-9	3.885120106574563e-5	3.9817662029702375e-7	-0.22361739012126375	0.24669921552389132	-0.9064373781910456	0.3816872851131869	1	0.4620490605001644
ENSMUSG00000095571	Ighv5-17	2.2468622567098255	0.33576177965072557	6.6918344876749	1.7724535266813986e-9	3.9265162976573024e-5	3.9837235779987673e-7	0.06404593516544665	0.27298286003569483	0.23461522513564442	0.8260729998318967	1	0.8657192124745448
ENSMUSG00000032816	Igdcc4	0.70546782916964	0.11777374009527516	5.990026542410382	1.8490412921393248e-9	4.0959962703470326e-5	4.1143017791392116e-7	-0.35363825243789354	0.09704341894813603	-3.6441240041933423	2.715356436324621e-4	1	6.109140148094959e-4
ENSMUSG00000104452	Ighv8-8	2.620223356901683	0.4008414962825956	6.536806646022523	1.8993517000083096e-9	4.2072539506884066e-5	4.1713585807892706e-7	-0.532782269298572	0.32954689687804245	-1.6167115343699994	0.14855036330841856	1	0.2053677622849097
ENSMUSG00000096422	Igkv12-44	2.019494294652909	0.32950982387111455	6.128783266391536	1.9121773189542294e-9	4.235472761483618e-5	4.1713585807892706e-7	-0.19025291654378249	0.2709842085502006	-0.7020811934454018	0.5137407488420416	1	0.591955124151223
ENSMUSG00000035697	Arhgap45	0.7327705696026652	0.12334572352995989	5.940786179138833	1.932475441497219e-9	4.280239855372191e-5	4.1747098105587014e-7	-0.12199429065687258	0.10115247999501133	-1.2060434965399676	0.2328053251487394	1	0.3028973973736756
ENSMUSG00000070031	Sp140	0.7742266994259763	0.12855873075264226	6.022357990727625	1.9788517900232475e-9	4.3827609445434886e-5	4.2159332195975136e-7	-0.15704898970354536	0.10581853189772673	-1.4841350270794977	0.1412085446237882	1	0.19649977025790566
ENSMUSG00000094075	Ighv1-80	2.5875686382538414	0.3971995160277083	6.514531196139058	1.9894521057828365e-9	4.406039578677248e-5	4.2159332195975136e-7	-0.8872390412438897	0.326008920172709	-2.721517683546386	0.00979177928231579	1	0.017511403376531797
ENSMUSG00000051506	Wdfy4	0.7768364283808948	0.13053894103749808	5.9509937969984295	2.201204816293754e-9	4.8747881861641476e-5	4.620661166731351e-7	-0.07115775486825814	0.10731186769149953	-0.6630930613641229	0.5128197360353286	1	0.5910715688315632
ENSMUSG00000030577	Cd22	1.53643466763215	0.2465717739893386	6.231186330754076	2.249298834249141e-9	4.9810722684447224e-5	4.667548435783534e-7	-0.11919661017490647	0.20215884051239627	-0.5896185883970649	0.5693398623496513	1	0.6433745724429106
ENSMUSG00000048833	Slc39a9	-0.09380845517180612	0.01567634065002283	-5.98407863583071	2.2654947241230583e-9	5.0167115170981004e-5	4.667548435783534e-7	0.021910708591020487	0.012909352833562574	1.6972739744207475	0.09007803783667949	1	0.13179421488058624
ENSMUSG00000051951	Xkr4	1.075676965934199	0.17626945534149016	6.102458102285898	2.3220322734697767e-9	5.1416760631441266e-5	4.725438738495568e-7	-0.05425929208380907	0.14439950773733787	-0.37575815135399565	0.7085733249221642	1	0.7673365967218122
ENSMUSG00000048865	Arhgap30	0.8817154569574674	0.1483848940924832	5.942083676037296	2.3360669688306703e-9	5.17251948238487e-5	4.725438738495568e-7	-0.10688657103443318	0.12197642812649208	-0.8762887442776205	0.38534150764517644	1	0.46572009205508064
ENSMUSG00000095612	Ighv5-4	2.1427729454727547	0.3413741042551513	6.276905362075133	2.492694382327632e-9	5.5190746319116104e-5	4.996841684790283e-7	0.0147968823698794	0.28017967150500456	0.052812119774418034	0.9599457403090664	1	0.9708978485280472
ENSMUSG00000034634	Ly6d	0.8945302472224812	0.14701006416485365	6.084823187474947	2.5601523934190963e-9	5.668177399029879e-5	5.086245616604313e-7	-0.17726487847861397	0.1208300070968554	-1.4670600684192734	0.15068230640605573	1	0.20776006939156935
ENSMUSG00000038179	Slamf7	1.2130733699530605	0.20461601001615923	5.928535943288406	2.743377436592857e-9	6.073563306872926e-5	5.402025782444926e-7	-0.17271538697703354	0.16830518137493725	-1.0262036234777085	0.3110371920705389	1	0.38874844468693825
ENSMUSG00000022146	Osmr	0.4868879080072986	0.08314936445121895	5.8555818342176265	2.81339163584557e-9	6.228286403434923e-5	5.491296253438576e-7	-0.14262679552799626	0.06751945511888906	-2.1123807245905244	0.0352146164143799	1	0.05673451812586831
ENSMUSG00000022952	Runx1	0.69649682502242	0.11765236016954289	5.919956250930568	2.9351327972552642e-9	6.497503473283978e-5	5.679099119280599e-7	-0.14748258638033482	0.09660494271535457	-1.526656734478801	0.12796588672541775	1	0.1799967725853259
ENSMUSG00000034463	Scara3	0.7857844599724372	0.13322048142412124	5.898375772046722	2.981092606774359e-9	6.598946594355721e-5	5.694349116457874e-7	-0.3051110299231969	0.10943495678496332	-2.78805821180824	0.005345778936505412	1	0.010015908312241657
ENSMUSG00000040229	Gpr34	0.8593410639523732	0.14532130050951048	5.9133868258778355	2.9941973242801277e-9	6.627655777294063e-5	5.694349116457874e-7	-0.005156437173704477	0.11962827689648375	-0.043103832199860435	0.9659444002806358	1	0.9751802180470126
ENSMUSG00000024965	Fermt3	0.6723085247472617	0.11405391580643023	5.894655347811896	3.1997791654187484e-9	7.082391204737858e-5	6.033753068621404e-7	-0.14841644428593023	0.0937533729500372	-1.583051783801143	0.11553907051374948	1	0.16444031329163614
ENSMUSG00000098814	Igkv19-93	1.9645769611924255	0.33181506451241255	5.92069851945777	3.2780442019698997e-9	7.255295232219978e-5	6.082682972184183e-7	0.5998040015014616	0.2725063231751987	2.2010645276507512	0.04013813122376214	1	0.06379838258875144
ENSMUSG00000076666	Ighv14-4	3.6146416334520026	0.524177091811954	6.895840527782426	3.299425567853863e-9	7.302288666774169e-5	6.082682972184183e-7	-0.2313909992340281	0.4302055067059822	-0.5378615466960281	0.6405696461767666	1	0.7080985243717638
ENSMUSG00000020810	Cygb	0.542249076305253	0.09250647512719598	5.861741846283333	3.3077373584750626e-9	7.320353548041161e-5	6.082682972184183e-7	-0.08093362519275066	0.07602328380670464	-1.064589966917648	0.2889432536897435	1	0.36469886765275866
ENSMUSG00000026407	Cacna1s	1.6374684235669592	0.2788531806911007	5.872152576881893	3.48809465206468e-9	7.719153465019136e-5	6.361770008450097e-7	-0.16673857069357778	0.22805062009336607	-0.731147192782521	0.4697367088282821	1	0.5499085341262747
ENSMUSG00000001025	S100a6	0.5179049519337601	0.08770210194826661	5.9052741089291105	3.5170565852536415e-9	7.782894517507784e-5	6.362441144591771e-7	-0.16969748241219318	0.07211924292767247	-2.353012532069711	0.019367270039214336	1	0.032839847507815184
ENSMUSG00000099762	Gm21149	1.9114369526040658	0.31107022505594323	6.144712025267962	3.5636182563597132e-9	7.885574477672773e-5	6.394683050182256e-7	-0.24528587200013838	0.25559174204948265	-0.9596783919280575	0.3436173489856774	1	0.42300578878452605
ENSMUSG00000076731	Ighv8-12	2.161709641794518	0.34664522669392384	6.236086567270795	3.709362404192221e-9	8.207706191756127e-5	6.578957976234788e-7	-0.05698968749654623	0.2848887671169324	-0.20004189029030708	0.8491095946853721	1	0.8841150019346847
ENSMUSG00000071713	Csf2rb	0.7542313261421462	0.1286863124145303	5.861006598064457	3.725444721610639e-9	8.2429189910357e-5	6.578957976234788e-7	-0.08850431103816152	0.10565555591863653	-0.8376683106595655	0.4052298120249977	1	0.4857125914333238
ENSMUSG00000030798	Cd37	1.2916379403235416	0.21512999540041428	6.003988137123598	3.856142870837443e-9	8.531716101727843e-5	6.756144489685351e-7	-0.05453348929049733	0.17689299206886616	-0.30828518785677456	0.7629539428966542	1	0.813316182026713
ENSMUSG00000024399	Ltb	1.2393248142025521	0.20698074470220218	5.987633371334403	3.935653115365043e-9	8.70723895243362e-5	6.812522710411109e-7	-0.18778390120206764	0.17016611662106307	-1.1035328591310396	0.28268609458331573	1	0.35791784969690216
ENSMUSG00000094194	Ighv5-16	3.2723459537653325	0.49636597649465836	6.592607287217133	3.955338725305184e-9	8.750395861992658e-5	6.812522710411109e-7	0.324880541512847	0.40794296138273134	0.7963871723920852	0.477242763675374	1	0.5569375745812528
ENSMUSG00000037868	Egr2	1.3121909230387758	0.2194424478358282	5.97965861199501	3.980171463545207e-9	8.804935311654708e-5	6.812522710411109e-7	-0.2394227345701839	0.1802952908069669	-1.327947798850286	0.1984694690392772	1	0.2640280273124398
ENSMUSG00000020388	Pdlim4	0.5022619425699386	0.08673920135195147	5.790483826706788	4.0835412315954586e-9	9.033201558412313e-5	6.936097400322943e-7	-0.17558506995514714	0.07094878962341651	-2.474814170715544	0.013468942116516952	1	0.023501994278122544
ENSMUSG00000076556	Igkv4-57	2.5005203850816	0.3893079014176995	6.42298904280065	4.186673573596541e-9	9.260921944795549e-5	7.057399521673988e-7	-0.20942182827515515	0.3199665500716304	-0.6545116301321879	0.5452788626033236	1	0.6208678728782393
ENSMUSG00000073530	Pappa2	1.0212780224831315	0.1750178888502006	5.835277920403055	4.318994406417224e-9	9.553183727554258e-5	7.208008749554168e-7	-0.12405515327194179	0.143888473339263	-0.8621618562832492	0.3898442992823815	1	0.4702860126501638
ENSMUSG00000076540	Igkv4-80	2.5121320592376133	0.40796345923344784	6.1577379110321315	4.367487587688408e-9	9.66000904644922e-5	7.208008749554168e-7	-0.18303724930723608	0.33540963034170745	-0.5457125638305675	0.6272762748463253	1	0.6966570697082897
ENSMUSG00000017400	Stac2	0.9896552035309518	0.16899443879720694	5.856140655128519	4.373202018739889e-9	9.672210904847012e-5	7.208008749554168e-7	-0.23907693467169372	0.13869415461866527	-1.7237708058355263	0.0843543698913731	1	0.12453351144194154
ENSMUSG00000106004	Gm43391	1.120723884621578	0.19213741028886513	5.8329290633023945	4.620626949655796e-9	1.0218978561858758e-4	7.559821342411112e-7	-0.6182379878114916	0.15794501696519533	-3.914260795880165	8.698013828976378e-5	1	2.0819654228544898e-4
ENSMUSG00000030745	Il21r	1.1980624388204268	0.20293148428342658	5.903778031540631	5.062374975332069e-9	1.1195442257946871e-4	8.222109896066706e-7	-0.17034058503905183	0.1669407611319272	-1.0203654510981766	0.3180143168913575	1	0.3964222165349914
ENSMUSG00000041801	Phlda3	0.6442536831897365	0.10878784697838056	5.9221107971533735	5.116716817154591e-9	1.1315107569455664e-4	8.250149702790348e-7	0.15665803017146418	0.0894591287040599	1.7511687453351488	0.0807953140228895	1	0.11971609058555732
ENSMUSG00000026979	Psd4	0.7476679354701715	0.1289007748498699	5.800337013807534	5.28897908169168e-9	1.1695519443344812e-4	8.431419716548511e-7	-0.05357545522940587	0.10597246511602454	-0.5055601487683474	0.6168711988730581	1	0.6872966324232345
ENSMUSG00000105499	Igkv3-11	2.731975848582612	0.41690580174376884	6.552981122248066	5.3049245441408995e-9	1.1730249152004357e-4	8.431419716548511e-7	-0.28437400393753454	0.3422025515770709	-0.8310107643177166	0.4486660997569856	1	0.529504051431669
ENSMUSG00000095981	Ighv10-1	2.7877981920940518	0.4313169987156478	6.463455417698363	5.344019121042355e-9	1.1816160678536751e-4	8.433316983142797e-7	0.3003625048431535	0.35177638951723117	0.8538449816241598	0.42722398862093697	1	0.5082693135221338
ENSMUSG00000015852	Fcrls	1.3518793369702806	0.22656594273740316	5.966825025141356	5.387045200489052e-9	1.1910756938281295e-4	8.441348081414218e-7	-0.3064145378075893	0.18632219833651972	-1.6445412331072262	0.10852687322575376	1	0.15556473981487126
ENSMUSG00000034755	Pcdh11x	1.1864128236049098	0.19892541803821598	5.9641087363555805	5.582082064964185e-9	1.2341425237429317e-4	8.685797764162104e-7	-0.6321328699049575	0.1637440969007783	-3.8604925726757786	1.492832823969349e-4	1	3.468416327257177e-4
ENSMUSG00000105160	A530030E21Rik	2.4418902454432354	0.3945301831027658	6.189362309973584	5.6445848667418745e-9	1.2479048223392936e-4	8.715631335700587e-7	0.7508910278957919	0.3219260646738656	2.3324952847682554	0.026179769350297023	1	0.043239760081165306
ENSMUSG00000076934	Iglv1	1.9130819044939034	0.3084232675086075	6.202780743318962	5.711077505506194e-9	1.2625479041422543e-4	8.715631335700587e-7	0.24826508087338497	0.2535224796617792	0.9792625932208928	0.35451702107736066	1	0.43427580294901436
ENSMUSG00000023067	Cdkn1a	0.8579878808605057	0.14198631562033381	6.042750508117513	5.750483215675876e-9	1.271201819657309e-4	8.715631335700587e-7	0.2771790512169747	0.11668513873811936	2.375444330053526	0.017321259885864818	1	0.029588158584398744
ENSMUSG00000052013	Btla	1.0547982589205296	0.17857619070748418	5.906712729964862	5.757933604548049e-9	1.2727912232853462e-4	8.715631335700587e-7	0.019170917793814843	0.14689740116822647	0.13050549323102295	0.8986646207609738	1	0.9238449167993902
ENSMUSG00000032322	Pstpip1	0.7110308082695675	0.12282030486501988	5.789195923678856	6.766374325734584e-9	1.4956393809603726e-4	1.0172878048778393e-6	0.0108187593378561	0.10106312597994897	0.10704952209772882	0.9155107791029898	1	0.9370730183458589
ENSMUSG00000048330	Ric3	0.3972223208365153	0.06743428606154761	5.890509769377087	6.915526435162222e-9	1.528538807963906e-4	1.0327340852939236e-6	-0.5183455523056809	0.054675453139418406	-9.48040706647529	2.48726418520318e-21	4.8255412457126896e-17	1.9412176564347935e-20
ENSMUSG00000047810	Ccdc88b	0.7638458004614286	0.13389612647744417	5.704763988001582	6.971236727255462e-9	1.540782741458002e-4	1.034113256121075e-6	-0.1132653124902019	0.10959964982905941	-1.0334459340596411	0.3064579132209152	1	0.38371476152600215
ENSMUSG00000093861	Igkv1-110	1.8092085405379674	0.29557010573672327	6.121080939591048	7.018490001803984e-9	1.5511564752986986e-4	1.0342279538419898e-6	0.6877568086306909	0.24246832098749796	2.8364810950546926	0.007716259554672933	1	0.014052585640123377
ENSMUSG00000056025	Clca3a1	0.6739131537201145	0.11644212305268611	5.7875374997688045	7.465597617644406e-9	1.6498970734994136e-4	1.0928750828303004e-6	0.026134075421677463	0.09570885973684343	0.2730580585071694	0.7873869417650402	1	0.8329045325036325
ENSMUSG00000094502	Ighv1-69	3.268842700493104	0.5000593458456549	6.536909524138849	7.579997970891882e-9	1.6751037515873969e-4	1.097124063973018e-6	-1.5505700077079516	0.4108643179745355	-3.773922289849596	0.0011856116652601831	1	0.002445299757269719
ENSMUSG00000094198	Ighv1-50	3.0746706717244123	0.4566410104434725	6.7332337687725605	7.593236522036978e-9	1.6779534066397315e-4	1.097124063973018e-6	-0.23369517392273698	0.37550906764718034	-0.6223422922567388	0.5909139881418884	1	0.6638943271974329
ENSMUSG00000095416	Ighv1-12	3.7462779342713577	0.537842800629029	6.965377113702988	8.124838270203463e-9	1.7953455125668593e-4	1.1663598474212728e-6	-0.28834658593928114	0.4412536540026861	-0.6534712706028398	0.5922603499745439	1	0.6649369315951146
ENSMUSG00000037447	Arid5a	0.5586156622721391	0.0972445899542972	5.744439485370611	8.417647974764063e-9	1.8599634965038673e-4	1.2006479813235588e-6	-0.33914566044439004	0.07962975263318714	-4.259031947602019	2.297942945927696e-5	0.3111874337375286	5.870439551072005e-5
ENSMUSG00000094546	Ighv1-26	3.2744553418912896	0.49585621233359933	6.603638838124146	8.577222322254832e-9	1.8951372721022052e-4	1.215616394219696e-6	-0.6382878165884938	0.40748505014064174	-1.5664079366057513	0.152527924724073	1	0.20999250420958723
ENSMUSG00000026980	Ly75	0.3884576250255928	0.06752916560841478	5.752442245150253	8.868443106263356e-9	1.959393819897826e-4	1.2489349845409236e-6	-0.3523625223464295	0.055608242409911815	-6.336516082436425	2.4527958730273694e-10	4.078999536844515e-6	9.70778387953255e-10
ENSMUSG00000096074	Ighv1-72	2.797835691271895	0.4517619395904996	6.1931638017315	1.0281843132365045e-8	2.2715676032334094e-4	1.4388760474104065e-6	-0.7885000280270753	0.369784296120343	-2.1323242666055915	0.057875170868515	1	0.0885924894740869
ENSMUSG00000027962	Vcam1	0.7030589140560531	0.12278292060732211	5.726031850183294	1.0352833525871614e-8	2.2871479825355568e-4	1.439755617401058e-6	-0.17398255735538598	0.10083614235369819	-1.7253987835543685	0.08761889604478446	1	0.12874347975713113
ENSMUSG00000020279	Il9r	1.9943079528400802	0.3256832827614988	6.123458152135282	1.056823474156348e-8	2.3346287367587883e-4	1.460582554251733e-6	-0.536588584995798	0.2660100491133578	-2.0171741134754484	0.06587289473731166	1	0.09961518151419883
ENSMUSG00000024013	Fgd2	0.6621390063356878	0.11616766701684093	5.699856279628108	1.0768759248712383e-8	2.3788189180405655e-4	1.4791090249574027e-6	-0.07829137107404475	0.09551923878114116	-0.8196398136445598	0.416876980635729	1	0.4977959480586887
ENSMUSG00000028581	Laptm5	0.7313828687878807	0.128776779788889	5.679462322220495	1.2028578153929447e-8	2.6569926284214756e-4	1.630637729076978e-6	-0.1362343749861238	0.1059078475733148	-1.2863482556551389	0.20215564688596593	1	0.2682909041428861
ENSMUSG00000040247	Tbc1d10c	0.9172614926964344	0.1602969480403535	5.722264234659796	1.206184989709085e-8	2.6642214052694267e-4	1.630637729076978e-6	-0.003883321307527164	0.13192472795538665	-0.029435886415777924	0.9767061590634553	1	0.9831571474924652
ENSMUSG00000022439	Parvg	0.7849962922464587	0.138165901884051	5.6815486421912444	1.2148831045969068e-8	2.683312313123188e-4	1.630637729076978e-6	-0.04559567394822526	0.11350769007672681	-0.4016967829880455	0.6905826894522387	1	0.7514012431785703
ENSMUSG00000016283	H2-M2	1.420969813824525	0.24325030678542447	5.8415951560463535	1.2197215944664758e-8	2.6938771135386584e-4	1.630637729076978e-6	-0.25033471272381297	0.200040901772	-1.2514176376246102	0.2229507312299302	1	0.2920567950428104
ENSMUSG00000040751	Lat2	0.7760964467211579	0.13682454366655025	5.672201974322327	1.2238393814024328e-8	2.702849273827273e-4	1.630637729076978e-6	0.08048725186246344	0.1126502827326417	0.7144877927513745	0.47744083989890124	1	0.5570810764861275
ENSMUSG00000094951	Ighv5-6	2.018218159065588	0.33756553899883507	5.978744646302752	1.2802161033990216e-8	2.827229242746399e-4	1.6956005069483115e-6	0.5416784568412233	0.27716692393030645	1.9543401830206413	0.07197071984180708	1	0.1078760853620781
ENSMUSG00000095429	Ighv5-12	2.217399684403514	0.3689943085660763	6.009305924040944	1.3071283015422661e-8	2.886531428295786e-4	1.7210007004507078e-6	0.2213835490847448	0.30335852708743283	0.7297752636468283	0.4988087723345176	1	0.5775311683429779
ENSMUSG00000076583	Igkv8-24	2.034464116931356	0.3306693042269447	6.152564180965114	1.330107690154536e-8	2.937143801399246e-4	1.7409544831546222e-6	0.13966374752161262	0.27116832189016493	0.5150444806682934	0.6236470745028208	1	0.6934918068346958
ENSMUSG00000076576	Igkv6-32	2.212169973774042	0.36409405956460894	6.07582001315649	1.3996190522655221e-8	3.0904988293074993e-4	1.8212235983602417e-6	0.1405939377818278	0.2993935700265037	0.46959571566410657	0.6677077565012807	1	0.7312464484367632
ENSMUSG00000037922	Bank1	1.3117514839831281	0.2286031876851166	5.738115453534119	1.4651719621212082e-8	3.2350996923636275e-4	1.8954384493697095e-6	-0.0066548332741503975	0.18809128216404147	-0.03538087038157604	0.9725299592357936	1	0.9799286384529113
ENSMUSG00000076545	Igkv4-72	2.2491693270723094	0.3699834718982645	6.079107576164295	1.4822550014822746e-8	3.2726708177727143e-4	1.9064541062417394e-6	-0.06018630861287604	0.3040607420724393	-0.19794172770431928	0.8527932110225842	1	0.8869062253415184
ENSMUSG00000025473	Adam8	0.9528985546123994	0.16829272877446938	5.662149289226794	1.525203387568255e-8	3.3673440390731937e-4	1.950419573378232e-6	-0.36298009083924493	0.13814702762880582	-2.6274911380254546	0.009717126854804817	1	0.01738907750090574
ENSMUSG00000071714	Csf2rb2	0.7463113498286414	0.13168781706886157	5.667277098521452	1.5666584866871558e-8	3.458711941059234e-4	1.9919838849871946e-6	-0.1925263650109236	0.10838434165591347	-1.7763300682504013	0.07837396354455418	1	0.11653184516069998
ENSMUSG00000031506	Ptpn7	0.8909750364533403	0.15882657677420495	5.6097351875812995	1.6693764732790594e-8	3.6853155024108513e-4	2.110528176530247e-6	-0.10266762866422356	0.130508755396795	-0.7866723451011077	0.43626948741222515	1	0.5170678792164387
ENSMUSG00000076937	Iglc2	1.745284287060216	0.30132163501744413	5.792097493959164	1.6804643993194017e-8	3.7096251614975793e-4	2.1125431270766107e-6	0.04709981186430937	0.24778932401422296	0.1900800692349678	0.8582997134607362	1	0.8916395221165713
ENSMUSG00000002007	Srpk3	0.678736377646219	0.11965697095556078	5.672351324172277	1.7143586916073688e-8	3.7842753758541057e-4	2.1430446767952563e-6	-0.08206953558143995	0.09852351324734739	-0.8329944078973408	0.40701529178975476	1	0.48751129125336884
ENSMUSG00000031165	Was	0.7592354112262365	0.13604702743514022	5.580683573466524	1.926451649286935e-8	4.2522567254710513e-4	2.394719309959977e-6	-0.09654333383107834	0.11187874718747631	-0.8629282706330249	0.3910306874171972	1	0.4714615998764592
ENSMUSG00000034764	1700006J14Rik	-1.480322457000732	0.2703345039688078	-5.475891664837342	1.952501748859592e-8	4.3095618600828915e-4	2.4136175785485988e-6	-0.5737679323136315	0.2178825663032122	-2.633381559840626	0.009098151870051165	1	0.016377556610347746
ENSMUSG00000055809	Dnaaf3	0.9093911402892663	0.16065859628819848	5.660395156558875	1.980762331746055e-8	4.371740542396718e-4	2.435024455452015e-6	-0.03428895453084426	0.13174638770165634	-0.26026485529525584	0.7960243018069963	1	0.8400109931187468
ENSMUSG00000041538	H2-Ob	0.9748414995810621	0.17157978670416238	5.681563768708271	2.0462805725841094e-8	0.00045161412236931295	2.490745145191142e-6	0.0015945595187480557	0.1410878651442274	0.011301889904691758	0.9914593708336475	1	0.9936837530313322
ENSMUSG00000022489	Pde1b	0.2550862835115196	0.04544299271659225	5.613324921234377	2.0484758508380705e-8	4.520781355214538e-4	2.490745145191142e-6	-0.44169750859397794	0.03745025014193545	-11.794247219176272	3.702612433291134e-32	7.607757766683294e-28	4.8320720969595915e-31
ENSMUSG00000069515	Lyz1	1.9299170184584482	0.3286200396729209	5.872791630051885	2.088786734942643e-8	4.6095345666714247e-4	2.5259561760439537e-6	0.1702096080364664	0.27024472460963767	0.6298350810818982	0.5295694229431362	1	0.6067062727786905
ENSMUSG00000073008	Gpr174	1.3220166851501802	0.23399803404188968	5.649691419687382	2.1041632762760682e-8	4.6432571017584e-4	2.530796597860475e-6	-0.042911875225778835	0.19260198937290282	-0.2228007891584951	0.8281874618185332	1	0.867240774291693
ENSMUSG00000035775	Krt20	1.2432195681351226	0.21763412358073853	5.712429409875651	2.1528366452658222e-8	4.750449341443563e-4	2.575417644828484e-6	-0.3822990484491236	0.1784203821641672	-2.1426870843565657	0.03509579240281729	1	0.05656765496233882
ENSMUSG00000074934	Grem1	1.2087365305792586	0.20877120707163715	5.789766450717968	2.1802177139271406e-8	4.8106503857802356e-4	2.5942259012081714e-6	-0.48835611189985706	0.1715181693915433	-2.8472558541890285	0.004788931645725995	1	0.009048787198458655
ENSMUSG00000026984	Il1f6	2.70704931778396	0.4489837601266777	6.029281141527669	2.31712843005545e-8	5.112512168074345e-4	2.7424693987853094e-6	-0.29095278136112956	0.3669410120054279	-0.7929143154944635	0.4508832599545887	1	0.5317822229009623
ENSMUSG00000001131	Timp1	1.507642861920349	0.25996071353391265	5.799502707256851	2.3747224457917783e-8	5.239350132150401e-4	2.7957645048313683e-6	0.30627823873944143	0.2134086110287417	1.4351728229850675	0.16511192816295667	1	0.22524097318091768
ENSMUSG00000021567	Nkd2	0.5382546881343152	0.09744135482723347	5.523883458811276	2.527698483442517e-8	5.576608394170881e-4	2.937478905989915e-6	-0.051706903772385654	0.07970782366585479	-0.64870550209911	0.5188908931990548	1	0.596684303078665
ENSMUSG00000034041	Lyl1	0.7037776879435202	0.12800921833597603	5.497867240282404	2.5307429816923775e-8	5.583072091911554e-4	2.937478905989915e-6	-0.10126791518072023	0.10493892778888805	-0.9650176280097599	0.3362059121750978	1	0.4152374418188334
ENSMUSG00000028480	Glipr2	0.6939465755058656	0.12561632210741996	5.524334448452024	2.534699339131112e-8	5.591546742123233e-4	2.937478905989915e-6	-0.4030867697342345	0.10313315912637662	-3.90841096257221	1.0798085403925153e-4	1	2.555500939403729e-4
ENSMUSG00000055044	Pdlim1	0.3101821009625114	0.05582392102505672	5.556437012428513	2.6123356186902438e-8	5.762551141268809e-4	3.011765795413296e-6	-0.36548102344284084	0.04598484598031094	-7.947857944317715	2.1160938011672686e-15	3.8614479683700316e-11	1.1759541251192031e-14
ENSMUSG00000030707	Coro1a	0.8104777317822213	0.14536416134255464	5.5754989696002735	2.6316899931137662e-8	5.804981786810345e-4	3.0184398988028046e-6	-0.03319742452097663	0.11960987465453035	-0.277547523704551	0.7841037900500847	1	0.8305371272625522
ENSMUSG00000096715	Igkv3-4	2.638949451658674	0.421874655577226	6.255292695997479	2.6553727155666643e-8	5.856955598725392e-4	3.0280273733585246e-6	-0.2993228227194363	0.3466243471763801	-0.863536636008796	0.4509321939857302	1	0.5318023166750188
ENSMUSG00000000682	Cd52	0.8762431038558438	0.15794316165720837	5.547838188509841	2.667266033788463e-8	5.882921964123833e-4	3.0280273733585246e-6	-0.1455821932417438	0.12995357014924688	-1.1202631299359302	0.2690783564146434	1	0.3432276145713271
ENSMUSG00000023947	Nfkbie	0.4738169993728155	0.08556283262053441	5.537649758209421	2.707236199321781e-8	5.970809437604188e-4	3.057802673660353e-6	-0.1079648968012172	0.07029425630351158	-1.5358992680007024	0.12633599140198618	1	0.17798544666870927
ENSMUSG00000030124	Lag3	1.1305042612965754	0.20357658518304095	5.553213599098885	2.8250100918489226e-8	6.230277256563613e-4	3.1747120986732513e-6	-0.16393053513805042	0.16745275139639412	-0.9789659099120688	0.3444422678526726	1	0.42388058746694424
ENSMUSG00000103332	Pcdhga2	0.6309231110261008	0.11332535286113424	5.567360657585744	2.958228841330028e-8	6.523782063785111e-4	3.2804445964786875e-6	-0.13775958782364933	0.09299520981076384	-1.4813621917083324	0.1399346994246247	1	0.1948855853350018
ENSMUSG00000033382	Trappc8	-0.10181131400103557	0.018329200158944424	-5.5545966609652035	2.961696159492801e-8	6.531132370913525e-4	3.2804445964786875e-6	0.15780570055984067	0.015080057931190514	10.464528802203514	1.4314367319858653e-25	2.8561457113313972e-21	1.3854240419059368e-24
ENSMUSG00000032292	Nr2e3	-0.9379397141199226	0.16953521317837478	-5.532418289603816	2.9633246321163822e-8	6.534427146279835e-4	3.2804445964786875e-6	-1.1899649653217803	0.1393530656313113	-8.53920909404383	1.2544500613836026e-17	2.3517175300758397e-13	7.963699947459783e-17
ENSMUSG00000030605	Mfge8	0.20936965050302506	0.03789907136171892	5.5244005454578256	2.9954140830668174e-8	6.604888053162333e-4	3.2888520667627014e-6	-0.23187530243722954	0.031131035667510513	-7.448364548925787	9.30094078712336e-14	1.6533352343190483e-9	4.623664733116216e-13
ENSMUSG00000105300	Gm30613	1.7846977381687585	0.3205297170810261	5.5679634151288635	3.0004807404288724e-8	6.615759984571621e-4	3.2888520667627014e-6	-1.6227893245029723	0.26685209164957335	-6.081231421015046	4.2593948407769296e-10	7.040779671804265e-6	1.656340346070036e-9
ENSMUSG00000094930	Igkv6-25	2.3592925874050232	0.39050917701861393	6.04158039362175	3.048042626481825e-8	6.720324382867127e-4	3.3246076706787787e-6	-0.23777597449116594	0.3206756254495132	-0.7414844023703357	0.49529955198398623	1	0.5742450151727635
ENSMUSG00000022505	Emp2	0.2851856172889849	0.052051891677159456	5.47887133589278	3.2458935905862015e-8	7.156221599165398e-4	3.4823115510777197e-6	-0.2708057803448841	0.042302716325492394	-6.401616819619964	1.5758090393374706e-10	2.630970772077841e-6	6.310893976655519e-10
ENSMUSG00000037664	Cdkn1c	0.4282047398422216	0.07766816458909519	5.513259417261197	3.257664815414668e-8	7.181847852063177e-4	3.4823115510777197e-6	-0.4865597524237458	0.06388207171706363	-7.616530574943456	2.8900321687023854e-14	5.181827678483377e-10	1.487878430953188e-13
ENSMUSG00000012889	Podnl1	1.0159994102449041	0.1833807008298305	5.5403835062649724	3.260788068663898e-8	7.188407297369563e-4	3.4823115510777197e-6	-0.20717776894604975	0.15063836271815265	-1.3753320549140822	0.18162902237538375	1	0.24463846106989492
ENSMUSG00000096410	Ighv1-19	2.3742543893556944	0.38336438935029876	6.193205355821983	3.267769390037772e-8	7.203470843399265e-4	3.4823115510777197e-6	-0.4488254427777304	0.3150946899395233	-1.424414492240013	0.18773134178774803	1	0.25174531947924916
ENSMUSG00000033220	Rac2	1.01477997943456	0.18273713057546725	5.553222687906186	3.270878226485297e-8	7.20999687464154e-4	3.4823115510777197e-6	-0.18731981107164075	0.15034010301690576	-1.24597367776565	0.21978215328384237	1	0.2883984603832504
ENSMUSG00000076508	Igkv17-127	2.6044730710545863	0.4309190229462031	6.04399651063846	3.307980557883796e-8	7.291450745687463e-4	3.4993176188734602e-6	-0.4789336564255508	0.3544631772306122	-1.351152072176904	0.2121716367156252	1	0.279731651867001
ENSMUSG00000095565	Ighv2-9-1	2.469311873162342	0.41081561844357056	6.010754611807743	3.3183048743081215e-8	7.313875773462531e-4	3.4993176188734602e-6	-0.44704138053978515	0.3375255540216161	-1.3244667706290332	0.21232921845908811	1	0.27990624088708865
ENSMUSG00000072188	Gm10354	1.2391442137723467	0.22687118996189345	5.461884402248167	3.403351237900818e-8	7.500986128333403e-4	3.5583550137459123e-6	-0.4897683271946143	0.18652132537226185	-2.6258033831634418	0.008411515316515765	1	0.015229017681675531
ENSMUSG00000096878	Gm21083	1.8862363594608926	0.3291770208359306	5.73015806106659	3.4062721582305484e-8	7.507083209524305e-4	3.5583550137459123e-6	-0.06555373077235145	0.2700077842006165	-0.24278459588277965	0.8092015316233315	1	0.8515217593234716
ENSMUSG00000041891	Lman1	-0.10831796512706379	0.01962763778740259	-5.518644999480499	3.4592475800035263e-8	7.623489816811771e-4	3.596809247787779e-6	-0.13655062841806775	0.016151379475805982	-8.454425123415264	2.8125968982955296e-17	5.251399668807583e-13	1.7476429372793588e-16
ENSMUSG00000026012	Cd28	1.1481742715632743	0.20697234216564478	5.5474768249197455	3.520640284613146e-8	7.75843499520199e-4	3.6436170685082378e-6	-0.2619520526793027	0.17032166207041907	-1.5379843614431103	0.13444569542039847	1	0.18796419554619817
ENSMUSG00000031167	Rbm3	0.30985187232146577	0.056231177227477655	5.510321632925996	3.7013639457545775e-8	8.156325590864787e-4	3.812918942453014e-6	0.11164602656804648	0.046280122836143266	2.4123969368736113	0.01599822372602247	1	0.027545962712042557
ENSMUSG00000026712	Mrc1	0.6112910195694204	0.11250058910712386	5.4336694982756475	3.751736125137336e-8	8.266950551740121e-4	3.844663499362694e-6	-0.24562463575262145	0.09206543842427471	-2.667935329006787	0.00786945614241253	1	0.014319861680145667
ENSMUSG00000000248	Clec2g	2.1706331474237595	0.4009723513642995	5.413423494258964	3.766736968500595e-8	8.299628236394212e-4	3.844663499362694e-6	0.013497732812491852	0.32736625875057446	0.04123128896669827	0.9689841341932803	1	0.9776840325549667
ENSMUSG00000056888	Glipr1	0.7204803459482861	0.13122991262055453	5.490214323555355	3.972426318236169e-8	8.75244690696975e-4	4.034864689491366e-6	0.05823419184123091	0.10805009000466173	0.5389555144166788	0.5926897602412099	1	0.6653854619135803
ENSMUSG00000052142	Rasal3	0.9041130102366304	0.16536049474091874	5.467527244963582	3.9893498345606964e-8	8.789335555504127e-4	4.034864689491366e-6	-0.17129384744820672	0.13591707064514333	-1.26028207226027	0.2154638146598354	1	0.2834842849653434
ENSMUSG00000022912	Pros1	0.30240676565899877	0.05577254814529613	5.422143612143779	4.023475644496648e-8	8.864119192390565e-4	4.050966360438684e-6	-0.31201316222597786	0.04530444129958231	-6.88703255742069	5.619000466567964e-12	9.693899604923051e-8	2.500567587632075e-11
ENSMUSG00000050350	Gpr18	1.1739130679760637	0.21333374330340268	5.502706931394944	4.409821960562068e-8	9.714837779118236e-4	4.419952632633629e-6	-0.055858839757263065	0.17551119744685847	-0.31826368100631347	0.7528671827683412	1	0.8053481892110168
ENSMUSG00000035493	Tgfbi	0.6022358742683398	0.11036275319907964	5.456876136299235	4.620139608527571e-8	0.0010177705543625386	4.609987732257711e-6	0.04003819571100756	0.09081975341657758	0.4408533849168024	0.6630694754503375	1	0.7272135862905464
ENSMUSG00000095630	Igkv6-23	2.3167565521733415	0.3843120326349784	6.028321664270682	4.6639990803192914e-8	0.0010273857174127334	4.632975157865382e-6	-0.44003971432686667	0.31359327828459665	-1.4032179411942483	0.19100481060453373	1	0.2554883102351356
ENSMUSG00000073591	Pcdhb22	0.4368092907010585	0.08054142456501016	5.423411530900867	4.727412488846979e-8	0.001041307148918324	4.654929631006396e-6	0.32645233688364916	0.06640199859882649	4.916302879013321	9.598614030857347e-7	0.014090765397298586	2.820638679352969e-6
ENSMUSG00000066952	Myo1h	1.4442443793684347	0.26200796508670815	5.512215549975669	4.7279407514603634e-8	0.0010413762299166596	4.654929631006396e-6	-0.3787943726215157	0.21545954872701326	-1.7580765153344273	0.08455028971730626	1	0.12479791021557424
ENSMUSG00000037860	Aim2	0.7739362328811835	0.1412231484395262	5.48023635949877	4.7941230073076225e-8	0.0010559055923595039	4.697827353802493e-6	-0.029070257469625913	0.11627183697992527	-0.25001976596142533	0.8034511528009637	1	0.8464768750461289
ENSMUSG00000002458	Rgs19	0.4066248366197551	0.07515066640082664	5.410794821844485	4.8137370754886e-8	0.0010601774535056092	4.697827353802493e-6	-0.2635582317092244	0.06156396771451425	-4.28104687682578	1.827626399888346e-5	0.2489227156647927	4.710599336965066e-5
ENSMUSG00000036446	Lum	0.6925417016880218	0.12507379375318556	5.537064807154161	4.9842779666737204e-8	0.0010976875366005535	4.83637555232005e-6	-0.2887403894625177	0.10261333489779854	-2.813868097651237	0.005196296918841453	1	0.009759669345922274
ENSMUSG00000096336	Igkv1-135	1.8379790178985218	0.3231588319340148	5.687540726950688	5.003515005156611e-8	0.0011018740744355889	4.83637555232005e-6	-0.008738691322803678	0.26577714376193773	-0.032879769867009745	0.9762059051060684	1	0.9827761722188062
ENSMUSG00000003882	Il7r	1.1000667178413683	0.1977721319589339	5.562293872979992	5.020910307788106e-8	0.0011056546588780187	4.83637555232005e-6	-0.24071119312426323	0.16275510948782007	-1.4789777960382686	0.14240004507226522	1	0.19791026876345869
ENSMUSG00000071715	Ncf4	0.9023876397234009	0.16611200187812908	5.432404820366038	5.250762367125575e-8	0.0011562178732410515	5.0359790271944466e-6	-0.0438179662562381	0.13665211152346413	-0.32065341521425555	0.7505658592958107	1	0.8035818185628197
ENSMUSG00000026117	Zap70	1.1860427478211337	0.2157044373956868	5.498462443057973	5.372873335851365e-8	0.001183052979821112	5.130978738026984e-6	-0.16031197993251184	0.17734219817431918	-0.9039697352512377	0.37254040851459436	1	0.45289824782047966
ENSMUSG00000029816	Gpnmb	1.2357468393801618	0.21560500990040496	5.7315311919282115	5.407585934584224e-8	0.0011906422710767544	5.142059599591178e-6	0.019650802765912363	0.17724094379109478	0.11087056041110795	0.9153383148651835	1	0.936982695131122
ENSMUSG00000056529	Ptafr	0.7663183464038377	0.1417326468183598	5.406787805112592	5.552688247703085e-8	0.0012225353714967883	5.257568774452823e-6	-0.072234401543667	0.11646887147575972	-0.6202034983974315	0.5392476272406589	1	0.6151652885789234
ENSMUSG00000044681	Cnpy1	1.0700304252324466	0.19130543668020458	5.593309023523264	5.594981123936586e-8	0.0012317910442458788	5.275166313081058e-6	-1.7328595331207446	0.1569904508440421	-11.037993227003385	3.0031790798331716e-27	6.049904256323924e-23	3.171511044393351e-26
ENSMUSG00000087107	AI662270	1.2650929694771476	0.2365693149864415	5.347662986426004	5.7086650344739896e-8	0.0012567626073394487	5.3596415899612124e-6	-0.18333730655274308	0.19433332449100654	-0.9434167147242297	0.35486815465600424	1	0.43461973300587575
ENSMUSG00000028033	Kcnq5	1.096925702440798	0.20105533097865563	5.455839927752273	5.733791331252962e-8	0.0012622368236620272	5.360613063517213e-6	-0.24374766432299258	0.16519636635631824	-1.4755025773220949	0.14322448813712155	1	0.19884495448549896
ENSMUSG00000068227	Il2rb	0.9482606618107348	0.17397416648321942	5.4505831582886115	6.014823247814996e-8	0.0013240430415415152	5.598557519683718e-6	-0.2375242611748671	0.14315620530434126	-1.6591964048635208	0.10520306362133379	1	0.151307179150559
ENSMUSG00000042401	Crtac1	1.0781731600608213	0.19616026478661414	5.4963891960161915	6.038622105631622e-8	0.0013292214978916327	5.598557519683718e-6	-0.8468969120071356	0.16069617358299765	-5.270174722422519	1.953959827189306e-7	0.002958490574347328	6.114127424383243e-7
ENSMUSG00000009185	Ccl8	1.7888250452616845	0.3157613128927116	5.665117834968864	6.306935781959765e-8	0.001388219634967164	5.813990661387383e-6	-0.35431357847350964	0.2595358791623673	-1.3651814909639095	0.200176756483888	1	0.26604545505453303
ENSMUSG00000104148	Pcdha2	1.7253985992623617	0.31837501355812736	5.419390736664536	6.323247225094363e-8	0.0013917467142432695	5.813990661387383e-6	-1.5243296121503196	0.2626530469626583	-5.803586251055505	6.137278941000793e-9	9.801848196672366e-5	2.174185539184981e-8
ENSMUSG00000020590	Snx13	-0.11336054547348662	0.02089425064958323	-5.425442021092428	6.450176773843747e-8	0.0014196194061552702	5.884913720237504e-6	0.14473762923533018	0.01717907936872276	8.425226179398647	4.0274785222246264e-17	7.508025461131148e-13	2.4824217340171793e-16
ENSMUSG00000026167	Wnt10a	0.8769141560696884	0.1604541763523838	5.465199946829932	6.453278269461827e-8	0.0014202374815431588	5.884913720237504e-6	-0.23940186154787005	0.13174858975542655	-1.8171113785148458	0.07212998152481358	1	0.10807839857970551
ENSMUSG00000022488	Nckap1l	0.690574887769907	0.12775820314076114	5.4053271789448	6.55450267196667e-8	0.0014424494030197052	5.952826079752261e-6	-0.04813859794081028	0.10513851892947325	-0.45785881740546086	0.6491484354334315	1	0.7156617864950346
ENSMUSG00000050921	P2ry10	1.0865703120099743	0.19983967098822794	5.437210272799046	6.663268201719602e-8	0.0014663188004704157	6.027007347823694e-6	-0.21312721786926833	0.1645335129848758	-1.295342292295548	0.20373330472889892	1	0.27004645043919284
ENSMUSG00000041515	Irf8	0.42721656663797825	0.07947506007604412	5.375479631335977	6.905315870294325e-8	0.0015195147572582663	6.220655199591864e-6	0.05350247757622346	0.06539024748930806	0.8182027080562989	0.4152926429517963	1	0.4960638070818349
ENSMUSG00000092517	Art2a-ps	1.7446042680720797	0.3220201683091273	5.417686343165081	6.997193602738831e-8	0.0015396624803466524	6.278006244134747e-6	-0.3625654873878748	0.26451302841578284	-1.3706904705577119	0.18823876522035168	1	0.25228892693157723
ENSMUSG00000018774	Cd68	0.6511468708943721	0.12131760161695118	5.367290996654439	7.079568371223462e-8	0.0015577174287202985	6.3264046517306525e-6	-0.14636921145354312	0.0997696730195435	-1.4670711752745889	0.1431003456109626	1	0.19870979719105897
ENSMUSG00000059714	Flot1	0.1923426466172604	0.03567822767551472	5.391037031507634	7.19496765519646e-8	0.001583036783496325	6.403809011831057e-6	0.037230505870979085	0.02936475333927906	1.267863735847513	0.2044764754056863	1	0.27088628567825235
ENSMUSG00000026011	Ctla4	1.8348478510936832	0.3376539078695083	5.43410814544101	7.466036141644141e-8	0.0016426026115231274	6.618596421821664e-6	-0.27584152536405404	0.2774870155360466	-0.9940700282180274	0.33391237206729923	1	0.4131615520697034
ENSMUSG00000095794	Igkv6-17	2.1953707387601913	0.3836797021951684	5.721883973011062	7.602774002725155e-8	0.001672610280599534	6.713068425977675e-6	-0.5654099293065344	0.3152194590215593	-1.7937024924208866	0.08670289105352819	1	0.12754370149623534
ENSMUSG00000032281	Acsbg1	0.7888390405256565	0.14713894818220713	5.361184446886289	7.78735448762925e-8	0.0017131401137335585	6.848870541669504e-6	0.29697079402056775	0.12115389735504976	2.4511864702979764	0.016315798781305138	1	0.02802986710027954
ENSMUSG00000096188	Cmtm4	-0.12974084474250555	0.024061160683088383	-5.392127439375572	7.869059929933068e-8	0.0017310358033866763	6.8934823819268e-6	0.11637525600541888	0.019729271040576958	5.898609014295118	3.928739003544924e-9	6.313483578696693e-5	1.414079125976676e-8
ENSMUSG00000000957	Mmp14	0.48753705866724745	0.09213544540818233	5.291525498219933	7.95850814092275e-8	0.0017506330357587774	6.938359971665045e-6	-0.3861108515950362	0.07532991663316285	-5.125597755209207	3.329202400370432e-7	0.004991140238635352	1.0203592646094004e-6
ENSMUSG00000049608	Gpr55	1.439633347530308	0.2661842714112658	5.408408768473079	7.982653151526904e-8	0.0017558643872098577	6.938359971665045e-6	-0.14815324935326926	0.21863499088636007	-0.6776282641339643	0.5057642709154996	1	0.5843680959674307
ENSMUSG00000034116	Vav1	0.8174785031774544	0.15256364265794842	5.35827861039122	8.114240983408733e-8	0.0017847273043007509	7.004929227841821e-6	-0.04165704732831533	0.12553015887677485	-0.33184891743192535	0.7427738791982809	1	0.796580951708162
ENSMUSG00000070000	Fcho1	0.5651405080985231	0.10563589352304384	5.349890924861076	8.122204578595073e-8	0.0017863976750162004	7.004929227841821e-6	-0.3663813193354547	0.08683548415822234	-4.2192580934756325	2.8742377666166315e-5	0.3867286914982678	7.270053943956652e-5
ENSMUSG00000000552	Zfp385a	0.30181142667770744	0.05638663489115083	5.352534820712859	8.247063900978672e-8	0.0018137767637422394	7.0851513073620244e-6	0.16143809294451061	0.04641752604034625	3.4779555636848927	4.937132880636087e-4	1	0.0010706182996494842
ENSMUSG00000061577	Adgrg5	0.8256998316877444	0.15449326507108996	5.344568459394002	8.512475278515518e-8	0.0018720635632511328	7.285041823932646e-6	0.14218792434950345	0.12705822987130497	1.1190768554978539	0.26834025010304546	1	0.3425217361773098
ENSMUSG00000076541	Igkv4-79	2.8179331202069324	0.46559922220674055	6.052271966544829	8.598631115054562e-8	0.0018909249685116487	7.320829786958025e-6	-0.1728519886506342	0.3815219082548979	-0.4530591426355269	0.673680338927786	1	0.7364314036591583
ENSMUSG00000094088	Ighv1-64	2.3232078644566583	0.3921722463485784	5.9239476686264485	8.620095295415948e-8	0.001895558955461967	7.320829786958025e-6	-0.45083313577651857	0.3224001832459847	-1.3983650109545447	0.2213389361884816	1	0.2901674818317271
ENSMUSG00000079523	Tmsb10	0.47575112282738236	0.08963158137998072	5.307851490542169	8.859042611816053e-8	0.0019480148799122317	7.495154264468402e-6	-0.3518386261860087	0.07345145533031398	-4.7900837989360054	2.1071149151761707e-6	0.030395132651416263	5.990215149812824e-6
ENSMUSG00000029657	Hsph1	-0.3214302010107375	0.06099397610890551	-5.269867969204366	8.966639266758016e-8	0.0019715846419747526	7.549622162727215e-6	-0.015536369149467258	0.04912308701240374	-0.3162742835266903	0.7532611060684108	1	0.8055759334388257
ENSMUSG00000037318	Traf3ip3	0.9658060585936118	0.17999712609179438	5.365674883614936	8.991280720519132e-8	0.0019769128920205416	7.549622162727215e-6	-0.14785319441795317	0.14813401770720833	-0.9981042619811324	0.32620162223286997	1	0.40508495905254993
ENSMUSG00000048163	Selplg	0.7405502794468014	0.13915798171466473	5.321651480726821	9.067977772860905e-8	0.0019936855931411983	7.58539749714015e-6	0.024560775182969133	0.11451558121978789	0.21447540082628613	0.8313415322712777	1	0.8696840824902774
ENSMUSG00000025007	Aldh18a1	0.4375512488611849	0.08256757771128703	5.299310709963717	9.167667696202161e-8	0.002015511743010045	7.640066438509148e-6	-0.48322450280849877	0.06766872238086492	-7.1410318653384675	9.722083942156621e-13	1.700392481483193e-8	4.542757030594855e-12
ENSMUSG00000000244	Tspan32	0.8380625454690438	0.15611006367793093	5.368408196911905	9.214013057231574e-8	0.002025608630501789	7.650037482703722e-6	-0.06224891322836512	0.12846123871468973	-0.48457350910821373	0.6331379319868333	1	0.701501553520821
ENSMUSG00000076552	Igkv4-61	2.161390366913924	0.3744615390979886	5.771995629031301	9.634527474120895e-8	0.0021179581746359963	7.963044712377342e-6	-0.26730798644045606	0.3073892308748322	-0.8696075190392825	0.40475347016120233	1	0.4852200562769739
ENSMUSG00000096632	Igkv9-124	1.9771763206460948	0.33381454461429394	5.922978349941652	9.662586276310647e-8	0.0021240297152586066	7.963044712377342e-6	0.08538365918161109	0.2701871349005965	0.3160167459972669	0.7666372765736442	1	0.8161935904803903
ENSMUSG00000031101	Sash3	0.9196384544829882	0.1718560179976173	5.3512147272942086	1.0072855307708615e-7	0.0022141143251874305	8.270520422576546e-6	-0.1402557721465907	0.1414289120407336	-0.9917050914327545	0.32863619466765903	1	0.4074261180939426
ENSMUSG00000055546	Timd4	1.6974693999760442	0.313227310489639	5.419289260960511	1.0335052727012507e-7	0.002271644589397349	8.430504770136084e-6	-0.11891948948177367	0.25724815407784546	-0.46227538505791427	0.6575621834536594	1	0.7230534107912204
ENSMUSG00000079543	Igkv13-85	2.4235526634996503	0.40776199531125384	5.943547195097715	1.0343480303119638e-7	0.002273393535822665	8.430504770136084e-6	-0.7651870675887654	0.3351728528457426	-2.2829625403490814	0.034838417439107	1	0.05619352130754402
ENSMUSG00000026483	Fam129a	0.4041856600960233	0.07659594509449305	5.276854533192289	1.0887001163778255e-7	0.002392745115775185	8.82339019999413e-6	-0.26663330748666625	0.06293603983419667	-4.2365758663732995	2.372297771279489e-5	0.3209007195209765	6.0499710840962655e-5
ENSMUSG00000040710	St8sia4	0.5274527591628336	0.09926291129068297	5.3136942318589995	1.09048236258972e-7	0.002396553088263428	8.82339019999413e-6	-0.1782848373478632	0.08172788458994007	-2.18144441450291	0.029997095054351112	1	0.048991879187783804
ENSMUSG00000076563	Igkv5-48	2.016813060220025	0.35087747304596645	5.747912633752392	1.0997976055976324e-7	0.002416915218061357	8.866520479040912e-6	-0.3870586202615264	0.2879604986155271	-1.3441379012831582	0.20924393569723898	1	0.27629409689982215
ENSMUSG00000001588	Acap1	0.7032105211316391	0.13293424139105373	5.289912619751589	1.1588941883487916e-7	0.0025466699788964696	9.309225481931034e-6	0.04089638766884616	0.10924713167699429	0.37434747293652093	0.7104275569589168	1	0.7688955479299994
ENSMUSG00000039109	F13a1	1.0301907663381689	0.19576436961022822	5.26240177612149	1.1991756411845463e-7	0.002635068553938922	9.59815006906379e-6	0.33472448763701806	0.16042798607349498	2.0864469836557986	0.038029632973062964	1	0.06081188381484901
ENSMUSG00000036526	Card11	1.0600399587158325	0.198336623244402	5.344650631717115	1.2531464208624326e-7	0.0027535386305610234	9.994179573695336e-6	0.0894701402805198	0.1631675143701373	0.5483330467213057	0.5910825761052774	1	0.6640502070543535
ENSMUSG00000026068	Il18rap	0.833180094271154	0.15854341692078838	5.255217217170412	1.2723368613810754e-7	0.002795578551826499	1.0110988393782254e-5	0.22697993083353854	0.12943972877204735	1.753556910129706	0.08183474854508897	1	0.12115136326525447
ENSMUSG00000095633	Igkv4-58	2.666259322161172	0.478549862722228	5.571539205954782	1.3088067649734295e-7	0.0028755793433231217	1.0363793354955082e-5	0.7365117650442988	0.3928009631013454	1.8750253543911848	0.08569862176796687	1	0.1263336446905413
ENSMUSG00000001930	Vwf	0.41954220364302697	0.0804303369409203	5.216218402158374	1.3287467839053804e-7	0.0029192566842401206	1.0484377549176814e-5	-0.424971810412617	0.0657213182260003	-6.466270334859048	1.0850380120154257e-10	1.8193917385474658e-6	4.4024764415308607e-10
ENSMUSG00000036905	C1qb	0.777209361308965	0.14699992328577588	5.2871412714823505	1.3393085500715395e-7	0.002942326953652165	1.0498186906657101e-5	-0.20937926962723818	0.1209264887310039	-1.7314591023393886	0.08723113499772142	1	0.12824446546642215
ENSMUSG00000031662	Snx20	0.7992415599233369	0.15207558855905728	5.2555546060764256	1.3399330733408012e-7	0.002943564975515072	1.0498186906657101e-5	-0.23320520014942464	0.12519636698105233	-1.8627153948062947	0.0640698155774641	1	0.09715261458458184
ENSMUSG00000023274	Cd4	1.08648865710346	0.20310128159307178	5.349491881987821	1.3829321251483778e-7	0.0030378869993134415	1.079706060234265e-5	-0.67914388751754	0.16709602240965918	-4.0643929024984455	8.695432470895103e-5	1	2.0815714675619896e-4
ENSMUSG00000076939	Iglv3	1.985585038222798	0.3620858431031754	5.483741151561706	1.4706900447981192e-7	0.0032305177524035488	1.1442071393987046e-5	-0.47348477255332216	0.29764667550308294	-1.5907611659126961	0.14559382600535983	1	0.20173162852265158
ENSMUSG00000017754	Pltp	0.3923476311584352	0.07508818050122673	5.22515832104928	1.5228626182059055e-7	0.0033449677408892713	1.180669551139359e-5	-0.2541044569793346	0.06180428738261162	-4.111437373369437	4.090274030140483e-5	0.5434747103847659	1.0152000830413372e-4
ENSMUSG00000049744	Arhgap15	0.5055057088919988	0.09634167410768084	5.247009807271943	1.5818071851243666e-7	0.003474281301407159	1.2221108220903571e-5	1.2602887494034594	0.07941540646910933	15.869575003606903	1.510761366539341e-54	3.2602230289918977e-50	5.002373685545666e-53
ENSMUSG00000078771	Evi2a	0.7512242868340323	0.1435561867846549	5.2329635082946675	1.6321978894329986e-7	0.0035847962245616947	1.256679419992168e-5	0.14707451379101785	0.11818858595133451	1.244405393356491	0.21674231740239167	1	0.2849136471034806
ENSMUSG00000051663	Pcdhb1	0.6643998399118892	0.1263518616959388	5.258330435294602	1.663064399442349e-7	0.003652422034055287	1.2760291707583347e-5	-0.5930880203281534	0.10397890802256107	-5.70392622510968	1.0786671968294317e-8	1.7094717735352834e-4	3.747880043199826e-8
ENSMUSG00000027797	Dclk1	0.8600773316730739	0.16455446930752074	5.226702959162746	1.7180445176315542e-7	0.003772997565170656	1.3136841430178596e-5	-0.46261954545059764	0.13547465584323246	-3.4148050982017497	7.840597826792342e-4	1	0.0016569583269442148
ENSMUSG00000036353	P2ry12	0.7983992665585677	0.1561006193005454	5.114645093248379	1.770461890696929e-7	0.003887934311970456	1.3491283400649783e-5	-0.0079107626795622	0.12772999851673547	-0.06193347507575297	0.9509893660678713	1	0.9641181148339806
ENSMUSG00000006800	Sulf2	0.3521627907094305	0.06781328930714485	5.19312356482797	1.790878268004523e-7	0.003932589588711132	1.3600284075552437e-5	0.049775001854397774	0.055583207968641746	0.8955043019913357	0.3720720279582055	1	0.45240298874852625
ENSMUSG00000076514	Igkv17-121	2.4676136513092968	0.4499992757694304	5.483594717102716	1.8100936282159792e-7	0.003974603588836647	1.3699453510691752e-5	0.7700545838403183	0.37020342418654967	2.080084984444334	0.04645788256754358	1	0.0727725691665197
ENSMUSG00000095007	Igkv12-41	1.980991033037365	0.34246991998485526	5.784423441115554	1.8234412649211075e-7	0.004003729985387275	1.3753692062969344e-5	0.2793865518134975	0.279252107574911	1.0004814439531147	0.3450474803670026	1	0.4245079888115766
ENSMUSG00000008496	Pou2f2	0.9070656337254124	0.17341314998482596	5.230662344838224	1.8393132559862497e-7	0.00403839618484341	1.3826540290185824e-5	-0.16384861176327542	0.1426798762132773	-1.1483652503199202	0.2545185301453106	1	0.327074317889882
ENSMUSG00000042474	Fcmr	1.154931819221066	0.21513956636470277	5.368291099291496	1.8739084762915541e-7	0.004114166059698107	1.4039170877428744e-5	-0.39987202556429946	0.17693210542232388	-2.2600309006092165	0.029482125416304763	1	0.04822869964991893
ENSMUSG00000041481	Serpina3g	1.1366607551946128	0.21609962453166048	5.259892318915538	1.952833882462918e-7	0.00428725150555909	1.458137809351758e-5	-0.4389664376442043	0.1777101531236986	-2.470125819646631	0.016001434116932035	1	0.027549358599184053
ENSMUSG00000031483	Erlin2	-0.12309755880340131	0.023584866113946296	-5.219345244898837	1.9812267365097628e-7	0.004349387054659882	1.4706350538876466e-5	0.08451974452356885	0.019379891260002315	4.361208398418989	1.3097146989713448e-5	0.18008577110855992	3.427718391767983e-5
ENSMUSG00000076549	Igkv4-68	2.175477443547909	0.39602826525417417	5.493237817638268	1.98278961020311e-7	0.004352619752317867	1.4706350538876466e-5	-0.32009436412104864	0.325636916877387	-0.9829793476443418	0.3470890748305486	1	0.42659517256156304
ENSMUSG00000039316	Rftn1	0.41858570857707056	0.08115901909593998	5.157599404722359	2.0190875594388706e-7	0.0044320991017242645	1.4916565690409127e-5	-0.15945524792864071	0.06670589963384338	-2.3904219687300454	0.017115664871760236	1	0.02927066782426693
ENSMUSG00000023078	Cxcl13	1.4032301388569897	0.26467885376026984	5.30163297491061	2.0295783326116727e-7	0.004454924440082621	1.4916565690409127e-5	-0.5839867140909929	0.2175514253698106	-2.684361700220017	0.009338309183530524	1	0.016765105506110833
ENSMUSG00000020901	Pik3r5	0.8666099636150394	0.1669652344209333	5.190361733810065	2.032664795951684e-7	0.004461495960634351	1.4916565690409127e-5	-0.16996916336325593	0.1374215269781243	-1.2368452534391703	0.2232444949548421	1	0.29237276381637384
ENSMUSG00000040747	Cd53	0.7915719803631683	0.15241647502801792	5.193480430627056	2.0379470450246616e-7	0.004472886174420127	1.4916565690409127e-5	-0.13954872213791567	0.1254175362275776	-1.1126731263855814	0.2672301051788552	1	0.341280897109264
ENSMUSG00000076614	Ighg1	2.342213726969392	0.3938557018089651	5.946882871599137	2.0628927198584627e-7	0.004527430652273368	1.5049647839203492e-5	-1.1508783626701373	0.31992820949745615	-3.597301921196444	0.001756351202326182	1	0.0035418316660286277
ENSMUSG00000031264	Btk	0.8974697113505782	0.17181705313146975	5.223403003332031	2.072085874636996e-7	0.004547399660478351	1.5067314639394706e-5	-0.003984007994056987	0.14145183101004466	-0.0281651214099454	0.9775905559102251	1	0.983869350018473
ENSMUSG00000076570	Igkv12-38	3.138088423551294	0.5464169713072728	5.743028837562618	2.0850601400387578e-7	0.004575664477315054	1.5112271392834658e-5	0.40089503257238684	0.4474871131211624	0.8958806205081481	0.3704361652241134	1	0.4507587833534807
ENSMUSG00000024696	Lpxn	0.6454576038254872	0.12499750460131612	5.163763915801333	2.1474157268870487e-7	0.0047122890710809395	1.5513684200962246e-5	0.01942744357307008	0.10288498009762383	0.18882681956721073	0.8509590675706104	1	0.8857091501783914
ENSMUSG00000034394	Lif	1.0019568212218548	0.19179112094353057	5.224208588451094	2.177379089514865e-7	0.004777822936122469	1.567924340478811e-5	0.04813937757239193	0.15577014475469858	0.3090411044311485	0.7629842246921759	1	0.813316182026713
ENSMUSG00000039158	Akna	0.4859440520642633	0.09383568205422958	5.178670218259043	2.205628460763986e-7	0.004839589968608338	1.5778983717821164e-5	-0.22614739461838285	0.07723210306828057	-2.9281527452184863	0.003566857848692281	1	0.006870338815032197
ENSMUSG00000061356	Nuggc	0.9822490325271102	0.18898997274919296	5.197360570185619	2.206462038879304e-7	0.004841198359505081	1.5778983717821164e-5	-0.279732525759856	0.1553352398491443	-1.800831067255065	0.07290190088007481	1	0.10912480299243489
ENSMUSG00000023064	Sncg	0.27068722782876875	0.05205111410933227	5.2004117963776135	2.2125041211452085e-7	0.004854234041792587	1.5778983717821164e-5	-0.36611927624547613	0.042626988947694254	-8.588907762045435	7.852796349698794e-18	1.4745980985464394e-13	5.029722843326075e-17
ENSMUSG00000044367	Slc16a13	-0.2845953908612105	0.05499433169009995	-5.174994987936969	2.2655905926003407e-7	0.004970479201105888	1.6062026906648906e-5	-0.13413395050908153	0.045242679326157435	-2.9647658473562344	0.0029437095847022372	1	0.0057355938677066095
ENSMUSG00000027863	Cd2	1.2636330116299694	0.2424336394502536	5.212284130599219	2.2666291172027128e-7	0.004972530957319312	1.6062026906648906e-5	-0.14785768411839884	0.19946838456512045	-0.7412587435385166	0.47229819280742	1	0.5522969880259566
ENSMUSG00000015950	Ncf1	0.8226981478050218	0.15936807168885705	5.162252006231337	2.289463760949398e-7	0.005022396652394694	1.6172335919011127e-5	-0.01958244012513451	0.13094213258411122	-0.1495503375321587	0.8823652378749675	1	0.9107296088670518
ENSMUSG00000040899	Ccr6	1.0305317400575527	0.19440707153454945	5.300896371325719	2.338762876286984e-7	0.005130310245423128	1.6468295177298e-5	-0.12379582655661267	0.1598427380292921	-0.7744851476075589	0.45148035710762235	1	0.5321761628437625
ENSMUSG00000001020	S100a4	0.5681662660696953	0.11055072815125973	5.139416768854824	2.3557716992334124e-7	0.00516738522226849	1.6535733779067086e-5	-0.18996178365641517	0.09081304567954705	-2.091789590745974	0.03779354802248542	1	0.060482180455144065
ENSMUSG00000050600	Zfp831	1.349574869872944	0.25827986192964064	5.225242339027534	2.3760872288145927e-7	0.005211709727681928	1.662588582652626e-5	-0.042955780043246655	0.21243316853945876	-0.2022084420176963	0.8447017068176556	1	0.8803080735515739
ENSMUSG00000001128	Cfp	0.5795804798368289	0.11353547920560754	5.104840212875089	2.448023420744366e-7	0.005369249768718618	1.7048452055631352e-5	-0.37164087040408167	0.09316911507064388	-3.9888848372370114	7.305904482308614e-5	0.9521785311792816	1.7633548176141552e-4
ENSMUSG00000032285	Dnaja4	-0.27585976108040433	0.053838890517138575	-5.123801000182009	2.4518020124048506e-7	0.005377292173606318	1.7048452055631352e-5	0.5239535719730452	0.043917869934020796	11.930304742925765	2.377554699474189e-32	4.889203483998722e-28	3.1340621811611482e-31
ENSMUSG00000036887	C1qa	0.7248393921904291	0.14038587580723064	5.163193149043958	2.4671632371990847e-7	0.005410735695501313	1.7101822177855712e-5	-0.20249510674810117	0.11548538350315597	-1.7534262830981326	0.08236339470066673	1	0.12186102104425396
ENSMUSG00000036896	C1qc	0.7665142008903599	0.14898748649989532	5.14482268878936	2.541280962269655e-7	0.005573029150257353	1.7529770973920452e-5	-0.24154699178708575	0.12253276975198532	-1.9712848430341803	0.05158562685460723	1	0.07996041679845806
ENSMUSG00000019359	Gdpd2	0.9120997588726965	0.1749880262088185	5.212355260149401	2.544656880399221e-7	0.005580178073027452	1.7529770973920452e-5	-1.4865045175602036	0.14417046917416157	-10.310742040829933	7.186956457440044e-24	1.4192801612152599e-19	6.386460388757924e-23
ENSMUSG00000039232	Stx11	0.5701543077261496	0.10984547263143074	5.190512581608283	2.574492429611015e-7	0.0056453469996510346	1.7680565139282316e-5	-0.2524654968598167	0.09047044120932571	-2.7905854496240976	0.005361486704366082	1	0.010040266003942913
ENSMUSG00000027238	Frmd5	0.7584229539328129	0.15003712156709306	5.054902053647197	2.623947969721192e-7	0.005753530713207658	1.7964758853620383e-5	-0.2979631832850241	0.12275526569643239	-2.427294516406914	0.015488240988598443	1	0.026740289434924267
ENSMUSG00000037548	H2-DMb2	1.3216272862698486	0.246583848168691	5.359747996818134	2.873530606003646e-7	0.006300503206723594	1.961316856263409e-5	-0.20370124376838133	0.20238662028117912	-1.0064956047261215	0.34833165044491016	1	0.4278860303659985
ENSMUSG00000032332	Col12a1	0.39162246465538186	0.0772524383092245	5.069386458558154	2.905608739613985e-7	0.006370547161603663	1.9771467909832043e-5	-0.22552374700847044	0.06298349612201568	-3.5806800335689744	3.4828033928553187e-4	1	7.714868919305495e-4
ENSMUSG00000042750	Bex2	0.6048828637409234	0.1181421236875665	5.1199592902237825	2.9171593411790957e-7	0.006395580139601049	1.978954649407807e-5	-0.4018451430575857	0.09724266476928795	-4.132395425515941	3.524332024507495e-5	0.47088600179444645	8.82014530168893e-5
ENSMUSG00000076695	Ighv1-18	2.3651244512362424	0.42040902590384516	5.625769918120615	2.994374835451831e-7	0.006564567951761049	2.024359639438309e-5	-0.9862596364606254	0.34554185620479755	-2.8542407200477733	0.007264944296685551	1	0.01329267951200972
ENSMUSG00000071552	Tigit	1.8103274499605317	0.34919521738112813	5.184284777831464	3.00228610406113e-7	0.006581611597322809	2.024359639438309e-5	-0.05080956326078588	0.28643220004033093	-0.17738774919032033	0.8677657156073242	1	0.8992062095645029
ENSMUSG00000018008	Cyth4	0.6000593118713087	0.11813577322347665	5.079403939196136	3.0400941828892975e-7	0.0066641904583116295	2.0436596877181197e-5	-0.06332591858269054	0.09698900406311267	-0.6529185364299969	0.5174237088388265	1	0.5952740264398287
ENSMUSG00000027408	Cpxm1	0.6871126143324241	0.13627959187476757	5.041933314298722	3.3202815690668685e-7	0.007278057199394576	2.2252887106417736e-5	-0.23067508863383945	0.1115510823315527	-2.067887498825209	0.041334149415375686	1	0.0654982309244783
ENSMUSG00000089871	Speer4cos	1.593517578209428	0.30950821026081227	5.148547034880347	3.466757060259808e-7	0.007598784800383473	2.3164808212564857e-5	-0.49226348862396707	0.2539548605177419	-1.9383897107556103	0.053944218472870405	1	0.08319329118657051
ENSMUSG00000006386	Tek	-0.1696377259917506	0.03346520773561855	-5.069077333447938	3.584718474875188e-7	0.007856985953231437	2.3881308618098146e-5	-0.30315874892541544	0.027509908899874286	-11.01998374581316	3.390509282225458e-28	6.861034583511437e-24	3.742173712241997e-27
ENSMUSG00000009687	Fxyd5	0.3739380407692357	0.07408887820801538	5.047154847173551	3.6638688759092197e-7	0.008030101415330237	2.433574518144957e-5	-0.1422637851356365	0.06087343243684349	-2.337042276747511	0.01976084585858523	1	0.03343633586491378
ENSMUSG00000045034	Ankrd34b	-0.6526060003228308	0.1261339304853025	-5.173913139881694	3.719006794471209e-7	0.008150575290763101	2.462845838802943e-5	0.20313600672137383	0.10327267005053277	1.966987070460912	0.05027310652361048	1	0.0781273147965398
ENSMUSG00000030218	Mgp	0.5423904880048802	0.10692430443494383	5.0726585585121855	3.7414367260542603e-7	0.008199358585147911	2.470347435947577e-5	-0.10140888454081212	0.08794899978808804	-1.153041930950386	0.2507747632355551	1	0.3230469088609006
ENSMUSG00000031659	Adcy7	0.5902327957341029	0.1169989371016189	5.0447705795947435	3.9305607395478003e-7	0.00861343080464505	2.5853354621816996e-5	-0.1010180368970486	0.09616884902299336	-1.050423686290514	0.29669126602563217	1	0.3730393490612161
ENSMUSG00000027073	Prg2	2.1742888939360805	0.3960631372217703	5.489753247898494	3.9471653490341686e-7	0.008649423429338573	2.5853354621816996e-5	0.15387087600238394	0.32505540145496775	0.4733681560547788	0.6561055012027025	1	0.7218652841802479
ENSMUSG00000095497	Igkv1-122	2.125412173373965	0.39092150113216845	5.436928302020856	3.9504474277191046e-7	0.008656220403618102	2.5853354621816996e-5	0.8671709424590833	0.32156240346346626	2.696742321611629	0.009131354513128322	1	0.016429349823855285
ENSMUSG00000006930	Hap1	0.40983083717952506	0.08014810402727257	5.113418990423891	4.1163250586059566e-7	0.009019279835911512	2.685992635749007e-5	-0.27998988212279596	0.06589412334688655	-4.249087291879501	2.164671783425773e-5	0.2935944339860376	5.543343520889271e-5
ENSMUSG00000009646	Pla2g12b	0.9297011724500919	0.17898301222470223	5.194354262419659	4.137179380349373e-7	0.009064560022345477	2.691706970530816e-5	0.2922712056281199	0.14577134860137048	2.004997610520646	0.0486093237975874	1	0.07577455960628536
ENSMUSG00000032000	Birc3	0.34900193175195526	0.06939782961874008	5.029003553415326	4.157874500836795e-7	0.009109487243883335	2.6972847089830767e-5	-0.030443075459939115	0.056926581551319876	-0.5347778600142076	0.5928589159440798	1	0.6654746374752419
ENSMUSG00000040663	Clcf1	0.4943375478002479	0.09775451723709283	5.056927922842548	4.247897919524922e-7	0.009306294762095199	2.747673738585728e-5	-0.33585969350072614	0.0801931149114444	-4.188136274187741	2.9819692576790826e-5	0.4007170288469151	7.52763291975045e-5
ENSMUSG00000085156	Snhg15	0.34090286232648825	0.06764821840030134	5.039347234678536	4.3294026514513366e-7	0.0094844223885344435	2.7922764752882228e-5	0.3187977540179082	0.055784861150839506	5.714771847435362	1.1520673799383899e-8	1.8241834893944467e-4	3.994180628078703e-8
ENSMUSG00000030263	Lrmp	0.7361170066942798	0.14597386934320375	5.042799851825343	4.387863704132309e-7	0.009612054230272235	2.821802175741272e-5	-0.1858483885753551	0.1200905381851303	-1.5475689540907311	0.1258010155732603	1	0.17733280947232277
ENSMUSG00000022584	Ly6c2	0.9219481421564366	0.1779577021589981	5.180715029309115	4.4447535859653785e-7	0.009736232730057161	2.850150202919759e-5	-0.28776748455581774	0.1462817416639569	-1.9672139617867443	0.051941344862318294	1	0.08045766323981876
ENSMUSG00000035711	Dok3	0.5925606442958667	0.11716222411147169	5.0576083613100975	4.458591324572271e-7	0.009766098437343102	2.8508079184786666e-5	-0.21680445706223966	0.09644576881622546	-2.2479416124034852	0.025494886968369383	1	0.04221197484434758
ENSMUSG00000052889	Prkcb	0.6885045657219461	0.13536321390430828	5.086349133293094	4.4810905460829244e-7	0.009814932623085429	2.8569841186501762e-5	-0.24150875999058818	0.11128950333019651	-2.170094687852371	0.031219933012015758	1	0.0508397782091893
ENSMUSG00000022659	Gcsam	0.9665296694618809	0.18883135371975662	5.118480858302278	4.5564970832077856e-7	0.009979639911641691	2.8967604742416126e-5	-0.11593599930948129	0.1552767698242512	-0.7466409781753094	0.4589188894400972	1	0.5396007297046925
ENSMUSG00000049775	Tmsb4x	0.27355922548199707	0.05443374338592088	5.025544973869137	4.632731715095655e-7	0.010146145729230994	2.936835139390126e-5	-0.26863647124146806	0.04478021516341044	-5.998999117381838	1.9963807708422084e-9	3.235534315303967e-5	7.3484646041373e-9
ENSMUSG00000076543	Igkv4-74	2.048958803070166	0.36164783657086097	5.665618858661954	4.669830083166342e-7	0.01022692788213429	2.9519428744469967e-5	-0.3047284271737208	0.2900261380408267	-1.050692979716278	0.3294497257122836	1	0.40838918366707644
ENSMUSG00000049103	Ccr2	0.6525311913597671	0.1311982897217855	4.973625744234181	4.894104232282834e-7	0.010717598858276178	3.080829532468501e-5	0.535395135643885	0.1071958124217285	4.994552711980387	9.536666900413392e-7	0.014005549009947106	2.804657351323003e-6
ENSMUSG00000034656	Cacna1a	0.3258426979937025	0.06528841966652361	4.99081919363377	4.901414113944763e-7	0.010733116626716242	3.080829532468501e-5	-0.23860935073162015	0.05342926315739231	-4.465892595762045	8.034336343442145e-6	0.1120548889819876	2.1525829979281295e-5
ENSMUSG00000042873	Lhfpl4	0.5178096212985379	0.10377976944429304	4.989504448422272	4.921420235343655e-7	0.010776433889332002	3.0846907508910334e-5	-0.2398067794195664	0.08542349671749475	-2.8072695292799215	0.004832709904502947	1	0.00912685690757894
ENSMUSG00000001228	Uhrf1	0.6185777751289966	0.12366385251232233	5.002090445689125	4.957794389691785e-7	0.010855586595669132	3.098760757444717e-5	-0.18005660851794408	0.10156811895445444	-1.7727669899910792	0.07877779086636164	1	0.11706188223369926
ENSMUSG00000020573	Pik3cg	0.607268313146301	0.121898344920495	4.981760117763501	5.134162261050445e-7	0.011241248270569949	3.2000068479169037e-5	-0.06896747401001997	0.10021594533809863	-0.6881886288388972	0.492487520648955	1	0.5715854958091517
ENSMUSG00000031304	Il2rg	0.6308704449940971	0.12500689545180035	5.046685166558236	5.191495137608635e-7	0.011366259454280346	3.226702746003624e-5	-0.2102241072769198	0.10288920239083965	-2.043208639895495	0.0426962385142766	1	0.06741654862199607
ENSMUSG00000099757	BE692007	1.0496920711501636	0.20723198074724	5.065299609477114	5.32314521934585e-7	0.011653961828713871	3.2993120968151675e-5	-0.1588217636102467	0.17055429401860508	-0.9312094106110367	0.35943949552320636	1	0.4393961221232208
ENSMUSG00000028159	Dapp1	0.40983432339297177	0.08240091541832788	4.973662262274032	5.625552865997613e-7	0.012315460334241975	3.477060467258691e-5	-0.29050386316238136	0.06777911459621591	-4.286038035359643	1.8746506755663358e-5	0.2550837174243113	4.8250841159082174e-5
ENSMUSG00000052336	Cx3cr1	0.6261248142240525	0.1267958766452902	4.938053435094174	5.744154777482053e-7	0.012574529223385962	3.54053152226463e-5	0.01924471345395145	0.10397373468975987	0.185092066870296	0.8541651745025745	1	0.8880492149264921
ENSMUSG00000022853	Ehhadh	-0.3055353935467883	0.061368175633850545	-4.978727009415214	5.7787545005531e-7	0.012649693601710735	3.552018408613454e-5	0.18666601672573532	0.050477600907653034	3.697997000040357	2.3292457873163422e-4	1	5.290735811920778e-4
ENSMUSG00000002033	Cd3g	1.068844331537664	0.21213495456115988	5.038511139047144	5.875453696848899e-7	0.012860780597032556	3.601507443762668e-5	-0.31141372240402815	0.17457154521407423	-1.7838744683284244	0.0851820279815814	1	0.12563036419554371
ENSMUSG00000095335	Igkv3-5	2.320590244509246	0.40923310889673975	5.670582839119187	5.908548447108224e-7	0.012932630841030482	3.611843722434206e-5	-0.4677208770601012	0.3363460380970708	-1.3905942811347016	0.19783039382047915	1	0.2633157390554539
ENSMUSG00000059498	Fcgr3	0.6602594964021872	0.13297693208268482	4.9652182981002975	6.107783314813336e-7	0.013368105341131947	3.719547977678661e-5	-0.15822141128238318	0.10921204743363716	-1.4487541896742355	0.1503614729415137	1	0.20743338920091894
ENSMUSG00000032172	Olfm2	0.5023503406764368	0.10021090897452564	5.012930686060717	6.118172485867556e-7	0.013390232302569733	3.719547977678661e-5	0.1323130218942211	0.08247557996445277	1.6042690691141355	0.10915962313336586	1	0.15634080679328807
ENSMUSG00000020437	Myo1g	0.828257057485245	0.16548674515641035	5.00497521237979	6.16282552919382e-7	0.013487343670640676	3.7364858542259316e-5	-0.16471303861183884	0.13617362446956782	-1.2095810716167654	0.23264886763929535	1	0.30271153463785516
ENSMUSG00000076587	Igkv6-20	2.3623678994677357	0.40950075326630114	5.768897567647383	6.347990612464526e-7	0.01389194265631737	3.838291823857287e-5	0.15407305518886408	0.3327890175513518	0.46297517965745205	0.6763587077744676	1	0.7388290638754028
ENSMUSG00000057454	Lypd3	1.018356219308386	0.20200908004107818	5.041140819518138	6.802582627605792e-7	0.014886091563989755	4.102012629996111e-5	-0.3102632510598325	0.16568005190938936	-1.872665100500547	0.058735702372089145	1	0.08975538173761112
ENSMUSG00000026981	Il1rn	1.4016042777502982	0.27607697569990886	5.076860445160118	6.975867486397823e-7	0.015264593233735716	4.195135876752377e-5	-0.552494846728864	0.22615318092877684	-2.4430116103600725	0.01827202862565701	1	0.03110718507647239
ENSMUSG00000001281	Itgb7	0.6981757757746474	0.14115128828888637	4.946294038391845	7.023156606271492e-7	0.015367368970182652	4.204106830068013e-5	-0.11489626209948096	0.11602398797640431	-0.990280235177292	0.3282956038742624	1	0.40711728706493966
ENSMUSG00000076596	Igkv3-10	2.3716369308520897	0.4325180551236436	5.483324690744094	7.02857283171678e-7	0.015378517355796316	4.204106830068013e-5	-0.4291272547396665	0.35524574339430076	-1.20797296721825	0.2854071692566161	1	0.36105491631866304
ENSMUSG00000045322	Tlr9	0.8225573535870337	0.16552446143870958	4.969400573410779	7.20997036443048e-7	0.015774694160337447	4.30104693241133e-5	-0.07119819194762021	0.13622962601618196	-0.5226336886453977	0.6058517631167176	1	0.6773254072808161
ENSMUSG00000024334	H2-Oa	0.9671657390918235	0.19406411649800318	4.98374329342733	7.513678477352097e-7	0.01643842577275092	4.470236893036404e-5	-0.015771995019781035	0.1597015860847043	-0.09875916330233382	0.9226632279905348	1	0.9422700333218923
ENSMUSG00000006782	Cnp	0.3085130974008119	0.0625580762789738	4.931626989695418	7.7962843921574e-7	0.017055931364722745	4.6141902186218565e-5	-0.3123848570088939	0.05149838399917102	-6.065915719101446	1.3338518921481749e-9	2.1744453545799547e-5	4.988157723056981e-9
ENSMUSG00000051212	Gpr183	0.6032128024467696	0.12319102222064301	4.896564632497137	7.79711258910529e-7	0.017056963499926733	4.6141902186218565e-5	0.12294436148843856	0.10138245578298315	1.2126788657754584	0.22902755690545698	1	0.2986983276890759
ENSMUSG00000096638	Ighv2-9	1.6392813101025976	0.31922833454369143	5.135137244147844	7.950361584236493e-7	0.01739141596551733	4.686737639201641e-5	0.2991736913480061	0.26209902223176335	1.1414529089065397	0.2950006784183527	1	0.3712372578169837
ENSMUSG00000021298	Gpr132	0.7874568350996193	0.16066098312157923	4.901357005289306	7.961830154232259e-7	0.017415707279367643	4.686737639201641e-5	-0.04385027616862178	0.13205866560976098	-0.33205148610392005	0.7422724750310705	1	0.7961199673149691
ENSMUSG00000036362	P2ry13	1.0544900678167266	0.21576344583867876	4.887250774652274	8.058974314093781e-7	0.017627394517217326	4.7314046823984355e-5	-0.12411170778793353	0.17746656299957866	-0.6993526312234276	0.49175277525846844	1	0.5709361336956005
ENSMUSG00000086564	Cd101	1.0817710473092066	0.22208037736218134	4.871078931683337	8.523988501530604e-7	0.018643667650547736	4.991243898619933e-5	-0.3554887229588674	0.18245032619221208	-1.948413742951376	0.05348363081311385	1	0.08259173219672401
ENSMUSG00000021587	Pcsk1	1.0748247110912	0.21729780827522896	4.946320994318678	8.738561520627573e-7	0.019112107901764566	5.0927659395298626e-5	-0.4668510436355272	0.17833188359273655	-2.617877601190447	0.00861891407443507	1	0.015577894327857585
ENSMUSG00000076538	Igkv13-84	2.3183244363092257	0.4495929680707463	5.156496210911428	8.7431422807982e-7	0.019121252168105663	5.0927659395298626e-5	-0.46456413966192545	0.3690264278080972	-1.2588912464109758	0.22891796000422826	1	0.29860789823274025
ENSMUSG00000026285	Pdcd1	1.810442607048532	0.35975379847714367	5.032448898975434	8.799106165242403e-7	0.019242765272768612	5.1035373407734395e-5	-0.05690681958663926	0.29556643545673256	-0.19253478325000725	0.8519934060885583	1	0.8865644418784233
ENSMUSG00000004707	Ly9	1.0268548275234821	0.2075428731522834	4.947675687085787	8.807506803545911e-7	0.0192602558779942	5.1035373407734395e-5	-0.18201475298030637	0.1707729532053576	-1.0658289241003538	0.29705175226840835	1	0.37345039492199306
ENSMUSG00000032011	Thy1	0.6648190949388297	0.1346735842846321	4.93652187598822	8.841464995056999e-7	0.01933363150469114	5.109907470260085e-5	-0.2421095924765089	0.11086126461892684	-2.1838970835190583	0.029661401491311877	1	0.0485005764684877
ENSMUSG00000018428	Akap1	-0.17531592915147362	0.035640247026707934	-4.919043603151688	9.201897361683703e-7	0.020120868771057586	5.303425325118704e-5	0.1462385117071616	0.029303777887043202	4.9904320279407255	5.961850045361674e-7	0.008844404542294043	1.7885550136085024e-6
ENSMUSG00000025279	Dnase1l3	1.0739631746052527	0.2173164150821007	4.941933052777061	9.223970162334e-7	0.02016821075994329	5.303425325118704e-5	-0.34556582366217053	0.17875674460375676	-1.933162434951325	0.05997288483281373	1	0.0914888701779061
ENSMUSG00000075042	4930431P03Rik	1.3138418696006766	0.2724326310943124	4.82263033001301	9.514799197445897e-7	0.02080315696529571	5.45654115830847e-5	-0.38915863008289114	0.22400901296276643	-1.7372454122976515	0.08865419287568174	1	0.13003588962932067
ENSMUSG00000037731	Themis2	0.7447200760896503	0.15227616356043103	4.890588642877827	9.55317409660642e-7	0.020886104527410618	5.4644646998352044e-5	-0.004756839827964989	0.12530904158708644	-0.03796086673170437	0.9700241826298767	1	0.978195757167263
ENSMUSG00000095204	Ighv1-52	2.2434254543867698	0.43157283862751833	5.198254509067992	9.627334667119557e-7	0.021047279049256774	5.492764709694289e-5	-0.24914841364999063	0.35500299135401114	-0.7018206035383469	0.5172152795230597	1	0.5950957745833602
ENSMUSG00000075256	Cerkl	0.5307155221137579	0.10856220903289732	4.888584405582026	9.814499248454239e-7	0.02145547680704581	5.5852282040244315e-5	-0.27842879963025435	0.08947133339900074	-3.1119330522167448	0.0018569859635376512	1	0.003731580843012397
ENSMUSG00000070691	Runx3	0.6643467718341987	0.13544616973182053	4.9048767724446245	9.980069531993093e-7	0.021816431996936902	5.66496242745863e-5	0.007794647380959202	0.11138797300628901	0.06997745959987181	0.9446962718743466	1	0.9596620135809023
ENSMUSG00000030789	Itgax	0.794028816037364	0.16132597112415342	4.921890818349976	1.0029318929798444e-6	0.021923088248646416	5.6774698022113514e-5	-0.05140472557214444	0.13296844661234974	-0.3865934128117438	0.7014091828821185	1	0.760837309428656
ENSMUSG00000001774	Chordc1	-0.20682490848026247	0.04247980283119529	-4.868782214035593	1.0053135149302379e-6	0.021974142809345138	5.6774698022113514e-5	0.09987564973414637	0.03490153020404959	2.8616409982665427	0.004381464893232307	1	0.008327665101162729
ENSMUSG00000104554	Gm4610	1.810897536671429	0.3631387710064734	4.986792051017729	1.0115756844559765e-6	0.022110009735154278	5.698372292362009e-5	-0.036845994938876116	0.2955165677570067	-0.12468334759888432	0.9112700722396287	1	0.9337633146398332
ENSMUSG00000102813	Gm37795	0.45184512209981165	0.09124696587002196	4.95189201954889	1.0152158865670772e-6	0.02218855841681004	5.704436538384857e-5	0.22761455350368004	0.074910851298723935	3.038472391616745	0.0024595163599322304	1	0.004856824505222937
ENSMUSG00000004110	Cacna1e	0.4441579900552407	0.08992175517774498	4.939383013346327	1.0192967717959547e-6	0.02227673094760059	5.7129401685722385e-5	-0.2892390297045899	0.0740418185210438	-3.9064279549317638	9.668119701119768e-5	1	2.3008056841670159e-4
ENSMUSG00000031098	Syt8	0.7384574525852764	0.15276363901356574	4.833987049232964	1.022763726670954e-6	0.02235147848266703	5.717968764360653e-5	-0.24436520889381083	0.1254501596622326	-1.9479067189053423	0.052699224848119584	1	0.08148220777538107
ENSMUSG00000025044	Msr1	0.7777707937101268	0.16039094523999087	4.849218841789096	1.0261283260580955e-6	0.02242398230934756	5.722401349152552e-5	-0.18705887458674578	0.13170455710854348	-1.4202915881838651	0.15664250369313043	1	0.21509826892593464
ENSMUSG00000094006	Igkv4-59	1.8275755211461309	0.3519089315648436	5.193319513146194	1.0348013903621038e-6	0.022612479982192693	5.756341434236793e-5	-0.7286681062480221	0.2892029275507922	-2.5195737554214332	0.02588189983970844	1	0.04279225392579525
ENSMUSG00000039981	Zc3h12d	0.782228518140717	0.1579143728140717	4.953497925497336	1.0766491532834557e-6	0.02352586064839679	5.9741945909501676e-5	0.26881180919639364	0.12976919106623552	2.071460929884269	0.03880188623101056	1	0.061904407437170426
ENSMUSG00000021640	Naip1	0.9955238209208631	0.1995390431245852	4.989117945700946	1.0816845006892822e-6	0.023634806340060818	5.9872044340391085e-5	-0.937889653262273	0.16366452745271123	-5.730561581423099	1.8459013639827927e-8	2.906925468000102e-4	6.314783468806045e-8
ENSMUSG00000022372	Sla	0.7355999987598555	0.1515518961463166	4.853782878768251	1.1352048494235148e-6	0.024803090755054377	6.26785188697832e-5	-0.20204157395799516	0.12466804220495785	-1.6206364548970216	0.10818782570379816	1	0.15512870922381833
ENSMUSG00000031133	Arhgef6	0.2559178625801103	0.052899134020657164	4.837845974570663	1.1383205843948375e-6	0.02487002812785841	6.269497852319191e-5	-0.406092903400794	0.04341723155665914	-9.35326571595994	9.17386418560737e-21	1.7720236060919196e-16	6.952576702791198e-20
ENSMUSG00000052821	Cysltr1	0.47693205363405006	0.09956661401954503	4.790080071824355	1.1747448419572e-6	0.02566465056223895	6.454135179849298e-5	-0.022814107355143217	0.08167452073450546	-0.2793295528394184	0.7809408385579465	1	0.8279357060583604
ENSMUSG00000043613	Mmp3	1.5199337724701227	0.31074206135867494	4.891303629204335	1.2124565303872468e-6	0.026487325362839795	6.631052836488554e-5	-0.10108216419868923	0.25587887026346895	-0.3950391218102874	0.704190005096062	1	0.7634815476973383
ENSMUSG00000036908	Unc93b1	0.41963053981133225	0.08648838734506938	4.851871478850681	1.213064950707378e-6	0.026499403848202673	6.631052836488554e-5	0.03613949567456957	0.07117944471866436	0.5077237651601577	0.6129222690754286	1	0.68354718370075
ENSMUSG00000057191	AB124611	0.7388421870095476	0.15149098200080924	4.877136429187586	1.2158867274672286e-6	0.02655982967479414	6.631052836488554e-5	-0.09784235054097021	0.12473654210020445	-0.7843920385605258	0.4370044887367655	1	0.5178286760507919
ENSMUSG00000060924	Csmd1	0.6617115594748797	0.13584925245371893	4.870925290518705	1.2542930886910994e-6	0.027397523936279686	6.823783744857127e-5	-0.5000584085139869	0.11182829439852077	-4.471662661078747	9.223164789521194e-6	0.12814665158560748	2.4554276110509225e-5
ENSMUSG00000027221	Chst1	0.3226157637120549	0.0660140235638716	4.887079234004111	1.2755805583513578e-6	0.027861230555510357	6.922669025335625e-5	-0.41754259676048033	0.054111545249087095	-7.716331049842355	1.752708062895296e-14	3.156802492080718e-10	9.195828131922479e-14
ENSMUSG00000076532	Igkv4-91	2.3705656057074487	0.43310005062909307	5.473482633548804	1.306558104415279e-6	0.02853653555853411	7.073533912735858e-5	0.6204166928043494	0.3565684095764176	1.7399653927317007	0.11723173515486955	1	0.166657509515142
ENSMUSG00000039936	Pik3cd	0.5491210005890871	0.11455308463815206	4.793594186692041	1.3393134057729824e-6	0.029250604782081937	7.233267619382192e-5	0.09920275122859576	0.0940833768395971	1.0544131658637923	0.2942190278570245	1	0.3704123338715996
ENSMUSG00000048779	P2ry6	0.41622757970885016	0.08654671532208881	4.80928222590348	1.434655202358058e-6	0.031331434964297626	7.720876576010029e-5	-0.2697770353433484	0.0712168124598465	-3.7881088190440177	1.5967006623251345e-4	1	3.6970017104470936e-4
ENSMUSG00000095682	Igkv3-1	1.9918736177376273	0.3637896908154727	5.475343771486855	1.4412832233885843e-6	0.031474743032359906	7.720876576010029e-5	-0.3763699833314237	0.2985158242246669	-1.2608041275834099	0.2427172164743876	1	0.31418595068204513
ENSMUSG00000079563	Pglyrp2	1.0030121786837036	0.2093350853641407	4.791419350172251	1.4416861430478774e-6	0.0314821003057365	7.720876576010029e-5	-0.12325378276898427	0.17231865540722105	-0.7152666232086865	0.48212599375140314	1	0.5616053547776396
ENSMUSG00000046434	Hnrnpa1	0.13556137297330012	0.028181439426329183	4.810306915928811	1.4434787899960327e-6	0.03151980285835337	7.720876576010029e-5	-0.073942106866756993	0.02316118661379882	-3.192500803162833	0.0013900372319423844	1	0.0028388910920559883
ENSMUSG00000024966	Stip1	-0.16997929581783552	0.03560920943852074	-4.773464463211535	1.5064499495308386e-6	0.03289333464800586	8.03837357961887e-5	0.12923484754474082	0.028988188505357303	4.4581898424200235	8.580644631460895e-6	0.11945973455919857	2.2920519050976754e-5
ENSMUSG00000022015	Tnfsf11	1.6322630640035893	0.33559502132306196	4.863788078763792	1.5162642304975017e-6	0.03310611320868245	8.065857617953883e-5	-0.17264168846067626	0.2741715870442729	-0.629684827380739	0.5410706873189187	1	0.6169287145033697
ENSMUSG00000021367	Edn1	0.4762630125751072	0.10008147098816506	4.758753122557789	1.5221845945004049e-6	0.03323385625172734	8.065857617953883e-5	-0.4200035328685317	0.08189295660203134	-5.12868933172836	3.1061886288113705e-7	0.004661767894120105	9.541110322982027e-7
ENSMUSG00000023885	Thbs2	0.46406715258709996	0.09673222373292363	4.797441169846184	1.5244793928145359e-6	0.03328243410392695	8.065857617953883e-5	-0.19331388749014713	0.07962854948970612	-2.4276957037266835	0.015482671361807147	1	0.02673274776686357
ENSMUSG00000020546	Stxbp4	-0.20054140899904302	0.04148745815742266	-4.83378394111531	1.5261004256701202e-6	0.033316298392804394	8.065857617953883e-5	0.012294454714257419	0.03399703335805932	0.3616331632460778	0.7184287923323137	1	0.7757064760377675
ENSMUSG00000050232	Cxcr3	0.8813589923741502	0.18550332011966636	4.751176376819532	1.5357833963290044e-6	0.03352615154186216	8.097800083345185e-5	-0.28709555100702905	0.15240372147125422	-1.883783074556876	0.0654578237592061	1	0.09902787846519547
ENSMUSG00000021270	Hsp90aa1	-0.3260181731396654	0.06904024333673994	-4.722146930298752	1.609350941296267e-6	0.03513052169755621	8.465642504676888e-5	0.2500470477916547	0.05582963010066863	4.478751647481542	8.395634608131012e-6	0.1169260031874406	2.243979167153431e-5
ENSMUSG00000008318	Relt	0.787838934896213	0.167145442747143	4.713493362113694	1.6480992267744173e-6	0.03597470992203198	8.647941284275754e-5	-0.097340251877546	0.13705297919307596	-0.7102381316382483	0.48309860488044076	1	0.5624732906281559
ENSMUSG00000104213	Ighd	1.0685851014495207	0.2158712089741928	4.950104770929731	1.651779715885666e-6	0.03605339585863643	8.647941284275754e-5	0.38702456493569914	0.1773101034309479	2.1827552826758287	0.03644044688228741	1	0.05856528592111066
ENSMUSG00000034959	Rubcnl	0.7613570464692987	0.15727554256419798	4.840911905667227	1.6820137526493823e-6	0.03671163216532542	8.784062191100242e-5	0.09365762630177307	0.12942656243807996	0.7236352765420978	0.47197965358602795	1	0.55201152546348
ENSMUSG00000052125	F730043M19Rik	0.8301408175854347	0.17287719843240798	4.8019104029500195	1.68680535744933e-6	0.03681452692633163	8.784062191100242e-5	-0.2924336965357182	0.14233152094540066	-2.0545954584993003	0.040217974291509834	1	0.06390703034781013
ENSMUSG00000090103	Gm16094	1.4016513173662484	0.2940272811915741	4.76707913526228	1.6896223171052551e-6	0.03687431744850509	8.784062191100242e-5	-0.5853729006864715	0.24106187540420904	-2.428309742902841	0.016674332723096652	1	0.02857961619331564
ENSMUSG00000034990	Otoa	0.6198876748146399	0.12997257856613556	4.769372752724259	1.7156239884138685e-6	0.03744006229915585	8.898449735710254e-5	-0.39078133919389163	0.10682731649735436	-3.6580656709051524	2.6485811498248136e-4	1	5.972190835503843e-4
ENSMUSG00000028602	Tnfrsf8	1.7545262432694024	0.35797118244906073	4.901305829329073	1.747766176686648e-6	0.038139753507656034	9.044080278477816e-5	0.05144855892645352	0.29366027187723714	0.17519754578161417	0.8682080615154452	1	0.8995996036187028
ENSMUSG00000076752	Tcrg-C2	1.23161164334127	0.2533493426995561	4.861317697602331	1.7664559271659431e-6	0.03854583478668804	9.11312104847872e-5	-0.06558368342650067	0.20830450790958077	-0.3148452430754342	0.7571788889420421	1	0.8086387068802199
ENSMUSG00000058818	Pirb	0.7467730330531505	0.15756027987325433	4.73960209802797	1.7692994889860264e-6	0.0386061148496751	9.11312104847872e-5	0.047386586063257914	0.12947900460990824	0.36597891840475044	0.7176066756370528	1	0.7750339362440487
ENSMUSG00000031290	Lrch2	-0.3613170212327841	0.07565469739255569	-4.775870285462766	1.815595527301991e-6	0.03961447881020214	9.329980618474966e-5	-0.4589641327570532	0.06274536132809555	-7.314710172073587	2.0082406726300656e-13	3.552577749882586e-9	9.795125648113018e-13
ENSMUSG00000028874	Fgr	0.6729977039727504	0.1423256094906774	4.728577705594389	1.833036116001131e-6	0.039993181978912676	9.397900142198425e-5	0.09458145832337349	0.11702174159465537	0.8082383413074518	0.4223032288666361	1	0.503518869655531
ENSMUSG00000030156	Cd69	0.9794511663194563	0.20263264062068018	4.833629781062508	1.840092829384722e-6	0.04014530525868648	9.41239207968723e-5	-0.07166078213166996	0.16689112485963503	-0.4293864169945572	0.6713443877713122	1	0.7344912957173502
ENSMUSG00000028583	Pdpn	0.30100840187188943	0.06300075197545363	4.777854111791688	1.8554203069775146e-6	0.040477849417021455	9.469026892329512e-5	-0.5008502999318427	0.051854228709282676	-9.658813030270434	4.767006439987231e-22	9.297092659907097e-18	3.858518017321058e-21
ENSMUSG00000055541	Lair1	0.6660431779395626	0.14096137999537844	4.725004664124311	1.8925581770757388e-6	0.041286156632907245	9.636455834808298e-5	0.06987608440845997	0.11594191803258042	0.6026818047707676	0.5508872082775402	1	0.6261002794659081
ENSMUSG00000013367	Iglon5	0.6073297003652433	0.1282303091771101	4.736241410183353	1.9119909738902573e-6	0.041708171104442075	9.713176063934272e-5	0.05999951020928999	0.10549973678513497	0.568717155489093	0.5709504899952454	1	0.6445897484846621
ENSMUSG00000040659	Efhd2	0.2849879816504251	0.06005057087683306	4.745799706633109	1.9290462330993455e-6	0.042078285482596026	9.777496066672788e-5	-0.05111691096345219	0.049408435211316146	-1.0345786249823339	0.3028147631940325	1	0.3797515243098922
ENSMUSG00000018931	Natd1	-0.10956353456102845	0.02314713200339621	-4.733352475155582	2.1193723383539956e-6	0.04622774944417735	1.0717762250162445e-4	-0.26527052270406243	0.018986114471524963	-13.971817303741133	2.511109286008067e-44	5.335856121838542e-40	5.570757001292672e-43
ENSMUSG00000023944	Hsp90ab1	-0.2072003948309063	0.04426394304350814	-4.681019823002298	2.155507304087537e-6	0.047013769809453265	1.0875780730896096e-4	0.25629330389333477	0.03567990881770185	7.1831266498691315	8.404672289580048e-13	1.4715740711825706e-8	3.942912989994637e-12
ENSMUSG00000003484	Cyp4f18	0.9624158678204253	0.19913512302659447	4.8329790003539195	2.17615503563192e-6	0.047461941327132176	1.0955118936164219e-4	-0.03975662228319891	0.16389855219492477	-0.2425684775782296	0.8115863750155978	1	0.8533104205675975
ENSMUSG00000025938	Slco5a1	1.220430226958896	0.2594517317075333	4.703881600353413	2.1992905621894797e-6	0.047964327870790364	1.1036116765806447e-4	-0.6437748244608519	0.21362536557661724	-3.013569211330199	0.00329564087696914	1	0.006381074238900133
ENSMUSG00000015745	Plekho1	0.2838789781410665	0.060225615638389296	4.713591968001652	2.202164327004657e-6	0.048024799643317566	1.1036116765806447e-4	-0.09166968432812139	0.04942534528530481	-1.8547100439858073	0.06339803253247918	1	0.09622575865485636
ENSMUSG00000035186	Ubd	1.2828357612478785	0.2566097663445782	4.99916967121693	2.2412194917346553e-6	0.048874273456257625	1.1199333889009717e-4	0.43308329032755893	0.21095114402722123	2.053002804628894	0.05410713925220232	1	0.0833925299924329
ENSMUSG00000052160	Pld4	0.7080943006859988	0.150030575380736	4.7196666338781395	2.2447992964353665e-6	0.0489500934580696	1.1199333889009717e-4	-0.13812650431423962	0.1234285744218505	-1.119080447629209	0.2688152033412159	1	0.3429902568693959
ENSMUSG00000038642	Ctss	0.7521832798284487	0.15832185722565298	4.750975594963978	2.2719094130163617e-6	0.04953898475082177	1.130922960828346e-4	-0.14340832183077135	0.13026493908674316	-1.1008973161633002	0.2746972760053845	1	0.34929362182957946
ENSMUSG00000028599	Tnfrsf1b	0.5232446337838622	0.11092495232845195	4.717104878571594	2.2834340033045907e-6	0.049787995008053296	1.1341225448109476e-4	-0.22140833789451586	0.0912516359150168	-2.4263492448586326	0.015757627622182205	1	0.02717165004813827
ENSMUSG00000085786	Gm15987	1.2788327974102112	0.27440762906460114	4.660339808224311	2.288618663895609e-6	0.04989875272891597	1.1341660109207393e-4	-0.08279163281488623	0.22586802184162524	-0.3665487134470868	0.717666586776881	1	0.7750339362440487
ENSMUSG00000020361	Hspa4	-0.0877627320322625	0.01858856752119763	-4.721328415015386	2.325352140845889e-6	0.050697327374722066	1.1498091219102638e-4	0.05788824829502684	0.01529656284744807	3.7843958065837224	1.5560267191439431e-4	1	3.60732970698811e-4
ENSMUSG00000034833	Tespa1	1.053695086704114	0.22383195487536314	4.707527516751776	2.35426117966559e-6	0.051325247977889524	1.161522516823482e-4	0.17910037335470838	0.18439061257154843	0.9713096065842978	0.33499990410414915	1	0.4141617327603857
ENSMUSG00000096020	Ighv1-75	2.716405360138949	0.5026768235324575	5.403880252624284	2.3732689478070648e-6	0.05173726306219401	1.1683098972932522e-4	-0.5543346797999114	0.4131261111254499	-1.3418049957911813	0.2202546149051151	1	0.2889332293511211
ENSMUSG00000034088	Hdlbp	-0.1111123270437144	0.02355484409128356	-4.717175227868792	2.3912086865022232e-6	0.05212595815706197	1.1745427038269528e-4	0.20276082974918014	0.01933936383790628	10.48435881596876	1.223880354058092e-25	2.4427427986645458e-21	1.1876389776775667e-24
ENSMUSG00000026581	Sell	0.9441733744935652	0.19778486104042015	4.773739352581742	2.4851257905344696e-6	0.05417077198207037	1.2179853296295701e-4	0.43656919894558033	0.16275623750075593	2.6823500324745013	0.00837140322849092	1	0.015163797886449972
ENSMUSG00000028634	Hivep3	0.27286893880205965	0.05859506502476313	4.6568587079260215	2.515933030141357e-6	0.05483979225799116	1.2303741945862711e-4	-0.42685784289204776	0.04755917496493545	-8.97529957588126	3.3378714150686955e-19	6.360647768554906e-15	2.323872867856494e-18
ENSMUSG00000042436	Mfap4	0.7323960173474547	0.15539139932506166	4.713233940414959	2.5374223615509367e-6	0.05530565779236422	1.2381619510278485e-4	-0.46926906450249906	0.12793784952830575	-3.6679455394369054	3.2980080598928046e-4	1	7.327406624131282e-4
ENSMUSG00000054484	Tmem62	-0.16070738230034703	0.034072317003979904	-4.716655526584095	2.560593697449978e-6	0.05580813963592227	1.2425128167903302e-4	0.01998678010815562	0.028009179277371753	0.7135796415249723	0.4742193603047615	1	0.5541023161089946
ENSMUSG00000015312	Gadd45b	0.3334956830524075	0.07135057677305183	4.674043268257986	2.562633055474876e-6	0.055850024811019444	1.2425128167903302e-4	-0.3930825894384321	0.05867478429139367	-6.6993444319502835	2.912050375549541e-11	4.950776843471774e-7	1.233975107719536e-10
ENSMUSG00000028042	Zbtb7b	-0.11075204829132107	0.023530133744287512	-4.706817627766723	2.563091020209256e-6	0.055857442603420314	1.2425128167903302e-4	0.2512496583273318	0.01936847695099354	12.972091660229562	1.646925821830668e-38	3.453603448378911e-34	2.858482563303759e-37
ENSMUSG00000105906	Iglc1	1.8876393879400666	0.3730869431231315	5.05951607992103	2.615356263558853e-6	0.05699384369547453	1.2650933091401748e-4	0.6675003325636045	0.3064524982039976	2.178152687530929	0.042021386174516714	1	0.06645147737067832
ENSMUSG00000068036	Afdn	-0.116989240355191	0.024993373495435987	-4.6808103106431105	2.6380736391218427e-6	0.05748626267010407	1.27331402481779e-4	0.14798970579068355	0.020332043716293647	7.278643891174004	3.369430766406584e-13	5.934241465795276e-9	1.6158018099851917e-12
ENSMUSG00000004267	Eno2	0.5420064312032467	0.11519274669076304	4.705213190707853	2.645201533937731e-6	0.05763894142450316	1.2739908946244254e-4	0.06710312636564578	0.09453506968632952	0.7098225725997364	0.4778084016145328	1	0.5573352817804205
ENSMUSG00000000318	Clec10a	0.8961996308743655	0.19371789648827561	4.626313041390093	2.663170351939834e-6	0.05802781879841705	1.279555229996733e-4	0.48483568753189693	0.1567422080632343	3.093204399266216	0.0020490477184717305	1	0.0040938637679549675
ENSMUSG00000004098	Col5a3	0.46930556230911596	0.09938621901604504	4.722038598061072	2.6724116271844062e-6	0.058226504533093845	1.279555229996733e-4	0.7949388809764969	0.08172157075912248	9.727405794971933	7.767857859287633e-22	1.5127903180962665e-17	6.224076529600616e-21
ENSMUSG00000035373	Ccl7	1.0601143545672558	0.22412632568850094	4.729985874308411	2.6740064803760766e-6	0.05825857918795358	1.279555229996733e-4	0.09617788823533886	0.18457118696507668	0.5210883118692681	0.6094314242936265	1	0.6805750876766617
ENSMUSG00000022686	B3gnt5	0.9623022550610567	0.20157070051536502	4.774018508645823	2.690516926607481e-6	0.05861560176307058	1.283833361718841e-4	-0.15418378791629808	0.1659641561253451	-0.9290185996538323	0.36641004901109964	1	0.44669022575860057
ENSMUSG00000053158	Fes	0.3424079620657622	0.07368241327753002	4.647078547441957	2.6944864496997827e-6	0.05869938730670977	1.283833361718841e-4	-0.05307035808828464	0.06045211578985345	-0.8778908297067777	0.38088889203118115	1	0.46128333623174284
ENSMUSG00000076674	Ighv3-8	2.3519492235927473	0.45796270020545954	5.135678566262215	2.72920709578885e-6	0.05945304737466431	1.2946181386739772e-4	-0.38833239259310914	0.3741354952270435	-1.037945871341211	0.35014705681977976	1	0.4297127660524472
ENSMUSG00000020785	Camkk1	0.31638653154324176	0.06808723056589533	4.646782207377939	2.7338954067714986e-6	0.05955244364570356	1.2946181386739772e-4	-0.27850675353957893	0.05573628790546275	-4.996865848187968	5.541160698283891e-7	0.00823139421730072	1.6668428646412716e-6
ENSMUSG00000028028	Alpk1	0.3891231443889882	0.08300256776121286	4.688085620536979	2.734576087262457e-6	0.05956453633275084	1.2946181386739772e-4	0.18695945900036984	0.06821569003968755	2.740710515302238	0.006430503691551181	1	0.011876256444281651
ENSMUSG00000021457	Syk	0.7528506731177996	0.1616971315833675	4.655930910744984	2.7457267286654674e-6	0.05980467387706254	1.2971372704784567e-4	-0.1532902210653231	0.13299744831000768	-1.1525801661097619	0.2535719246290524	1	0.3259519869971719
ENSMUSG00000034353	Ramp1	0.6038217116287816	0.12883075949111655	4.6869374520020415	2.753359489832866e-6	0.05996816968855982	1.29798733068371e-4	0.01122483987342481	0.10608812166424893	0.10580675477457827	0.9160267206850277	1	0.9374099794774629
ENSMUSG00000105606	Igkv2-109	1.9977549471250104	0.39028273322560253	5.118737717689935	2.7682442158665486e-6	0.060289590777357564	1.3022452864111327e-4	-0.5841745390182521	0.32071463955080204	-1.8214776220893942	0.09516894351525294	1	0.1385957302282802
ENSMUSG00000004698	Hdac9	0.5437306763292081	0.11640844056113404	4.6708870397044615	2.79750177821427e-6	0.06092399372595037	1.3106043040566408e-4	-0.20933629694696473	0.09599306653385413	-2.1807439277204206	0.029648794053494326	1	0.04848352439805264
ENSMUSG00000021700	Rab3c	1.2800154085593611	0.2738174764556506	4.674703109268782	2.7977935572644123e-6	0.0609275502965471	1.3106043040566408e-4	-0.6027605066826652	0.2254491827166426	-2.6735981005539906	0.007373033795535855	1	0.013477152303004052
ENSMUSG00000070034	Sp110	0.5273901789680204	0.11334711530391349	4.652876939602286	2.808631652010602e-6	0.06116076285418287	1.3129172875816787e-4	-0.18744211860218138	0.09321617156060713	-2.010832621250816	0.04465118225184777	1	0.07019453555785395
ENSMUSG00000002983	Relb	0.36309242842164063	0.07808800900163815	4.64978468607163	2.8549763651200715e-6	0.06216711035048956	1.3317836289368281e-4	-0.13087850193065098	0.0639971336942938	-2.045068183144592	0.041763002121706694	1	0.06609306971622302
ENSMUSG00000076586	Igkv8-21	1.6774972632758638	0.33548482842337507	5.000217956678792	2.912261125971185e-6	0.06341157375689659	1.3556636467360845e-4	0.19348473130961083	0.2757462718353927	0.7016766900301447	0.49340480754248556	1	0.5724658657121622
ENSMUSG00000015189	Casd1	-0.10701287208472997	0.022871900053153295	-4.6787923974849805	2.9345777255610943e-6	0.06389456081864171	1.363200187295614e-4	0.05172049961421085	0.018839074818507294	2.7453842671404023	0.005978886808288997	1	0.011108568000270413
ENSMUSG00000025423	Pias2	-0.0815186035054987	0.017379353051639113	-4.690543040542603	2.9635626540145166e-6	0.06452268610320405	1.3737965128016044e-4	0.023471046292094448	0.014210014410721094	1.6517257205866125	0.09871992929723387	1	0.14312074190726812
ENSMUSG00000094433	Igkv5-43	2.1179805838274643	0.40006142567346104	5.2941384695164455	2.973743906419826e-6	0.06474137858666604	1.374171683745385e-4	-0.5301126952190228	0.3289584470771601	-1.6114883199660783	0.11791817899464362	1	0.1675263312993114
ENSMUSG00000018501	Ncor1	-0.12654991233319324	0.027054595276828797	-4.677575511232219	2.976723525078763e-6	0.06480327114096467	1.374171683745385e-4	0.28462696187197273	0.022248765688945422	12.792932688998258	2.9646125986109565e-37	6.196633253616621e-33	4.886340365310548e-36
ENSMUSG00000022221	Ripk3	0.49467025243244517	0.10588550139853246	4.671746801014828	3.05416693253146e-6	0.06648615995427735	1.4070034868686855e-4	-0.26377992911169473	0.0872187999678541	-3.0243471500286074	0.0025265747823273363	1	0.004975116414297837
ENSMUSG00000033542	Arhgef5	-0.09101487276784191	0.01947116069810425	-4.674342437978199	3.0632485567629053e-6	0.06668079458361492	1.408271562738252e-4	0.05782745247599301	0.016029834201372543	3.6074891199462047	3.1111483587341164e-4	1	6.938574935370634e-4
ENSMUSG00000013584	Aldh1a2	0.542123416884683	0.11704011320921413	4.631945424690547	3.075635453750998e-6	0.06694735692179797	1.411050814049762e-4	-1.038404025416004	0.0961357429615629	-10.80143548514708	1.3186779328557508e-26	2.647114082414634e-22	1.3471947972439536e-25
ENSMUSG00000076749	Tcrg-C1	1.2544815767889923	0.27663629294470665	4.534768606951131	3.1646489276997728e-6	0.06888174856031326	1.44890130226847e-4	0.010827232771538471	0.22532661311011015	0.048051282634100294	0.9619215017936548	1	0.9721891050331856
ENSMUSG00000022496	Tnfrsf17	1.1664383281503787	0.25353265147737897	4.600742039943728	3.199516395368774e-6	0.06963747434520136	1.4618570700893345e-4	0.14240570274200484	0.20819096452753488	0.6840148085445398	0.5019201266870422	1	0.5805897660071416
ENSMUSG00000032089	Il10ra	0.5987039536708827	0.12894418480634173	4.643124888261244	3.2141983776189905e-6	0.06995381349049971	1.4655559036967246e-4	0.008140408561874415	0.10607395621267182	0.07674276375205043	0.9394551339748508	1	0.9556757048447071
ENSMUSG00000024677	Ms4a6b	0.7905976962145049	0.16878551223393695	4.684037662656351	3.2222154371684412e-6	0.07012507455909679	1.4662068648759713e-4	-0.135264976570742	0.13889900007422984	-0.973836935459969	0.33531085719442033	1	0.41440801396539917
ENSMUSG00000094652	Ighv1-42	2.0049800635571406	0.4010200047407	4.999700862438429	3.248165388935555e-6	0.07068657519401554	1.4749985320245928e-4	-0.5935719056329084	0.3293343621933852	-1.8023382123859972	0.0885463721746011	1	0.12991199573104634
ENSMUSG00000048644	Ctxn1	0.40835316405304806	0.08839929359162053	4.619416597823993	3.310843999955473e-6	0.07204727628303105	1.500398978472693e-4	-0.24434262854810693	0.07258543172812172	-3.36627643771996	8.09874027995733e-4	1	0.0017081049286192468
ENSMUSG00000022657	Cd96	0.9909230334958328	0.21153382905026027	4.684466016357082	3.3438541735307813e-6	0.0727622668160298	1.5066605192372545e-4	-0.3594445693116978	0.1742962957821725	-2.062261665967446	0.04079767608643741	1	0.06474034307511901
ENSMUSG00000027199	Gatm	-0.29485820059159185	0.06281944307284443	-4.693741080284315	3.345049083367011e-6	0.0727849230049828	1.5066605192372545e-4	-0.23333784439052355	0.051513251681756765	-4.529666382391452	6.308501691569097e-6	0.0885776722513217	1.7095417262100107e-5
ENSMUSG00000052837	Junb	0.3784577347792	0.08194799777113192	4.618267011674573	3.3494554813317295e-6	0.07287745236281577	1.5066605192372545e-4	0.0748691859964864	0.06716849979870282	1.1146472858685508	0.26685305975131457	1	0.340877629744905
ENSMUSG00000051439	Cd14	0.6776982499646926	0.1457527168685564	4.649644030826942	3.3517457957954294e-6	0.07292393327912115	1.5066605192372545e-4	-0.3763592289465844	0.1190688704576841	-3.160853273403133	0.0016866431047606702	1	0.0034061985590878264
ENSMUSG00000070003	Ssbp4	0.22321467185313387	0.04810482547705301	4.64017215818841	3.369905956901332e-6	0.07331567399834538	1.5117697065929745e-4	-0.2565532948579512	0.039599728957039886	-6.478662900351548	8.501229729250599e-11	1.4289717051897332e-6	3.475208264718187e-10
ENSMUSG00000033219	Gm9758	1.23183740357071	0.2633872951756789	4.676905173991314	3.4009326813717752e-6	0.07398729048324297	1.5226187745111342e-4	-0.21495403639241745	0.21658009723425165	-0.9924921040178708	0.3221874380968539	1	0.4008831116195883
ENSMUSG00000054128	H2-T3	1.025713963108084	0.2196857284798799	4.669005903139606	3.43044140418106e-6	0.07462582230655478	1.532746017759694e-4	0.15829294058937074	0.1807306440288934	0.8758500332907818	0.3844761220790395	1	0.46486867317180386
ENSMUSG00000075122	Cd80	1.22035370324662	0.2618629583898927	4.660276164105701	3.4578250511397105e-6	0.07521806833744213	1.541885074407008e-4	-0.17169936332287059	0.21528849863130012	-0.7975315189359946	0.4361738408076945	1	0.516982055708305
ENSMUSG00000029380	Cxcl1	0.9670400854724577	0.2022590140885287	4.781196476361664	3.4935022554931366e-6	0.0759906610614867	1.5546783737395558e-4	0.2789745484698584	0.16609247791205992	1.6796338520373304	0.10218680098153451	1	0.14758915413735715
ENSMUSG00000002985	Apoe	0.6162239825394841	0.13066491284809345	4.716063165755025	3.512586129498338e-6	0.07640226090271834	1.5600509773945612e-4	-1.057961080486794	0.10708139247951794	-9.879971262879835	2.731035349725431e-22	5.334531348618684e-18	2.2349491565553718e-21
ENSMUSG00000096326	Ighv1-78	1.6919598031352556	0.35159205522503983	4.812281102462059	3.527951734133562e-6	0.07673295021740496	1.5637540644662526e-4	0.002585600002030653	0.28875081331383523	0.008954433659795223	0.9928409526974964	1	0.9947185392621005
ENSMUSG00000001741	Il16	0.44046254160614917	0.09518914528193334	4.627234967827238	3.5703800730602712e-6	0.07765219620898783	1.5794140557786102e-4	-0.20835264232723696	0.07832953312569836	-2.6599500088030092	0.008059756930291503	1	0.01463383528812046
ENSMUSG00000018548	Trim37	-0.11068371802517597	0.023794210723940903	-4.651707901107637	3.588884661103452e-6	0.07805106360967788	1.5844498530597802e-4	0.27395445955259046	0.019486577357012404	14.058623766169266	9.236486157211251e-45	1.9640464164694003e-40	2.0801726061144487e-43
ENSMUSG00000021091	Serpina3n	1.0700037841258043	0.2217763959756483	4.824696421900976	3.6797980648968127e-6	0.08002456851731099	1.6213700344954254e-4	-0.05615521915495916	0.18247389190163102	-0.30774385622920575	0.7583050348650834	1	0.8096470888091636
ENSMUSG00000026269	Rnpepl1	-0.1357112921168149	0.029442839365437727	-4.609314014602928	3.7161772048508857e-6	0.08081198949668736	1.6341632210501396e-4	-0.008017249660188457	0.02420800307882235	-0.3311817845562862	0.7405729110570836	1	0.7946035222264041
ENSMUSG00000037432	Fer1l5	-0.221559018800564	0.0480545737762555	-4.610570886179406	3.7406654928347715e-6	0.08134077114169211	1.6416873349322782e-4	-0.3279202619855156	0.03950389586987813	-8.300960063930201	9.75964124239441e-17	1.8110966253511306e-12	5.877179358173694e-16
ENSMUSG00000049709	Nlrp10	0.7708223927612821	0.16770208140814305	4.596379402622331	3.7583640801733144e-6	0.08172186855928855	1.6447135150056752e-4	0.2376120186377362	0.13840259127190677	1.7168177015625514	0.08953122660343261	1	0.13108036078121985
ENSMUSG00000074874	Ctla2b	0.4282760565629973	0.09407100044766285	4.552689506063795	3.762344070549138e-6	0.08180464712594991	1.6447135150056752e-4	-0.3132446067395729	0.07653673518143607	-4.092735416489912	4.3905587715289915e-5	0.5818807539907372	1.0856131039592353e-4
ENSMUSG00000054934	Kcnmb4	1.5239642191994336	0.33667740108254857	4.526482069480449	3.7947258190409117e-6	0.0825049287575875	1.6556165529309672e-4	0.0866607265155625	0.2743797757735716	0.31584225284548	0.7524248514563024	1	0.8050331735609286
ENSMUSG00000022831	Hcls1	0.5422540250550095	0.11724902556252324	4.624806239996013	3.841891243181662e-6	0.08352655751801251	1.6710923309452993e-4	-0.03878829653768084	0.0964996224472955	-0.4019528320835199	0.6889496126724345	1	0.7499543971221732
ENSMUSG00000019102	Aldh3a1	0.8713904100577472	0.18796723287769332	4.6358633721269085	3.8452171742573065e-6	0.08359502136835384	1.6710923309452993e-4	0.17032693197284207	0.1547031735109261	1.1009918420375036	0.2733153477611032	1	0.3478458825785918
ENSMUSG00000097415	AU020206	0.4930342914817734	0.10771423540791572	4.577243570588825	3.884877145734257e-6	0.084453344271117	1.6850370637374844e-4	-0.48475965817560634	0.08844034042364338	-5.481205249250851	5.400504964438272e-8	8.342700069064242e-4	1.7661175185731335e-7
ENSMUSG00000030669	Calca	0.6084921572883322	0.13359690116308326	4.55468766109731	3.927664270619958e-6	0.08537956591473664	1.7002812779292738e-4	-0.4154301041818257	0.10941217208221546	-3.7969276751919296	1.5149416714024287e-4	1	3.516845814332336e-4
ENSMUSG00000000409	Lck	0.8194990630753898	0.17732369005751927	4.621486631648401	3.960069821119208e-6	0.08608003770166822	1.708722618355537e-4	-0.21803718500033104	0.14586085893012327	-1.494829981117723	0.14191390499069234	1	0.1973455596492654
ENSMUSG00000094509	Ighv14-1	2.137388401488537	0.4263179819386436	5.013601330558357	3.962522453244605e-6	0.08612938804372473	1.708722618355537e-4	-0.6704215268416899	0.3505838644637866	-1.9123000080653763	0.08645523994133691	1	0.12728037210101148
ENSMUSG00000094164	Ighv2-3	2.110125552834717	0.4228599123808637	4.990129097255637	3.9804148619624484e-6	0.08651431702475382	1.7131182029695636e-4	-0.028665524005927378	0.34603651273503466	-0.0828395933693766	0.9364993253458381	1	0.9533926775509616
ENSMUSG00000016206	H2-M3	0.4846342758582798	0.10515064330834537	4.608952076851597	4.106704006593349e-6	0.08925510487929984	1.7640592828322124e-4	-0.27598015658196645	0.08656766323247453	-3.1880282576281527	0.001506018376113409	1	0.0030614301924812228
ENSMUSG00000050967	Creg2	0.9313967978583184	0.19380923599764618	4.805740000283734	4.183537022538042e-6	0.09092081011081926	1.7936008148072054e-4	-0.5543776084773941	0.15910184823397774	-3.4844196634480165	5.034076290975195e-4	1	0.001090047017813245
ENSMUSG00000058470	Gm8369	1.259434522534552	0.2675300545850468	4.7076375194106745	4.218515944544815e-6	0.09167678850684792	1.8051191977320514e-4	-0.09610953107923192	0.21968938737899665	-0.43747917105084727	0.6695822758687222	1	0.7329598671892035
ENSMUSG00000003348	Mob3a	0.24485221114758032	0.053224619919752386	4.600356217042939	4.232666069633778e-6	0.09198006635921163	1.8076977488564526e-4	-0.2158786251826068	0.04382415473886525	-4.926019143300346	8.246111301769223e-7	0.012149820392026773	2.440598863735927e-6
ENSMUSG00000031232	Magt1	-0.14311500998600032	0.031007488974245004	-4.615498214153118	4.243626122734127e-6	0.09221399564701258	1.808906606455116e-4	-7.138295443519668e-4	0.025513940877607	-0.02797801985104068	0.9776868728985337	1	0.9839217824000576
ENSMUSG00000048031	Fcrl5	2.347455094467555	0.45950386969388524	5.108673178381274	4.278841746976431e-6	0.09297495232005086	1.8204303577815022e-4	-0.4841276492963815	0.3766010625938037	-1.2855185430492382	0.22919432287223276	1	0.29889830490153857
ENSMUSG00000028541	B4galt2	0.297738925397572	0.0648444266922438	4.591588523261403	4.314082817584791e-6	0.09373639146048235	1.831920930803038e-4	-0.5622212931092758	0.05341116771668588	-10.526287238120718	4.937117254413571e-26	9.878677914356114e-22	4.897717165758197e-25
ENSMUSG00000022181	C6	0.7433063629519102	0.1634038185464781	4.548892244770194	4.323918364423681e-6	0.09394577430383332	1.832600143367454e-4	-0.08438373758860424	0.1339740108687599	-0.6298515439032875	0.5370228748406564	1	0.6133190980895881
ENSMUSG00000030579	Tyrobp	0.5712980219604502	0.12418470812907033	4.600389456700872	4.33284167496903e-6	0.09413531823037714	1.8328908766109483e-4	-0.08443864825728824	0.10220836153022603	-0.8261422744000964	0.41151737505460123	1	0.492161951751676
ENSMUSG00000076490	Trbc1	0.9780101800497608	0.2129673816988081	4.59230034312449	4.354285750688322e-6	0.0945968579337038	1.8384670253997315e-4	5.72541765723926e-4	0.1753087113111568	0.0032659059634961157	0.9975468146607788	1	0.9983544358843605
ENSMUSG00000045679	Pqlc3	0.3113743214508505	0.06757619710456515	4.607751468598333	4.375406934308453e-6	0.09505134024091683	1.8438859790776018e-4	0.13411006036524734	0.05565041408452233	2.409866351785987	0.015892483759086366	1	0.027372370626475018
ENSMUSG00000024533	Spire1	-0.16057215997239793	0.034979607231297415	-4.590450627722563	4.394781512692388e-6	0.09546783880021675	1.8485497814540327e-4	-0.2350767954172864	0.028782643686246216	-8.167310757823744	2.6049071314292256e-16	4.810221508897208e-12	1.530950570032533e-15
ENSMUSG00000035772	Mrps2	-0.1093080619505667	0.023810219156099616	-4.59080452951499	4.420899017840915e-6	0.09603076846554036	1.8560268687920417e-4	0.1983761245479524	0.019599083086976617	10.121704350535216	4.544677286616354e-24	8.985281463369193e-20	4.075921576158827e-23
ENSMUSG00000010021	Kif19a	0.599839169717398	0.13049498222972683	4.596645476079879	4.47310666451868e-6	0.09716034986001025	1.8744085949567825e-4	-0.43822268658337266	0.10703298681426869	-4.0942769105734484	4.4558323721975213e-5	0.5902195560212837	1.1008963592468027e-4
ENSMUSG00000005883	Spo11	0.6710092802328377	0.14729928700312694	4.555414312484711	4.513486610398959e-6	0.09803292917786538	1.8877742587967525e-4	0.5191093295147214	0.12167067007951872	4.266511634853773	2.3249266112612724e-5	0.31472531536643844	5.9359658091996064e-5
ENSMUSG00000076526	Igkv12-98	2.447618112505069	0.4554959059091877	5.373523846761097	4.5426666314814115e-6	0.09866217656914478	1.8964141691762265e-4	-0.1299840824468048	0.37143516883323907	-0.3499509291355309	0.7517870735958263	1	0.8045408895046523
ENSMUSG00000068699	Flnc	0.7858114503947967	0.17039872772374828	4.611603976696118	4.658387085814622e-6	0.10117085072972196	1.941081854802643e-4	-0.3384839426211438	0.13960952331997303	-2.424504679708473	0.017849419760431404	1	0.030434286520257408
ENSMUSG00000072875	Gpr27	0.36964191160123105	0.08050434945185732	4.591576903832778	4.692600272641239e-6	0.1019092001209498	1.9516831526456116e-4	-0.44220934446033605	0.06635816681787059	-6.663977708637467	2.3164759933381276e-11	3.9470434450488356e-7	9.887570943365946e-11
ENSMUSG00000028859	Csf3r	0.6151095512401207	0.13539062426712964	4.543221176279472	4.711086862993696e-6	0.10230596231677111	1.955716302023745e-4	0.0368476831450192	0.11114441537750862	0.33152977610133494	0.7414543709476076	1	0.7954725751183808
ENSMUSG00000021037	Ahsa1	-0.17340274682011636	0.03827367461457646	-4.530600956566533	4.731312821549919e-6	0.1027404579199565	1.9604551506947345e-4	0.14506461396793682	0.030970074463289973	4.684025352922141	2.8805302350719392e-6	0.041237670845289884	8.076446353400418e-6
ENSMUSG00000047443	Erfe	0.9746664822913859	0.2121587773530983	4.594042699771206	4.744971559222832e-6	0.10303231243696456	1.9624602632763426e-4	-0.770706618430114	0.17534341758857644	-4.39541232302481	8.887992193691702e-6	0.12361419542986418	2.3701667581715493e-5
ENSMUSG00000036594	H2-Aa	0.5987013757202904	0.12985937433654712	4.6103824138924265	4.783520610577689e-6	0.10386458301747337	1.9737319150772928e-4	-0.17889599223440594	0.1068372421035059	-1.6744722038134248	0.09902047760337823	1	0.14352841164437294
ENSMUSG00000028071	Sh2d2a	0.9668891096795169	0.2119551968927928	4.561761748963252	4.789965548252834e-6	0.10399973198366554	1.9737319150772928e-4	-0.3754384337599107	0.17417544566278356	-2.1555187203986668	0.03578758049441769	1	0.057574250132404595
ENSMUSG00000096844	Igkv6-14	2.047011866723117	0.4015839581727392	5.097344714757272	4.803806100971878e-6	0.10429543425820045	1.975776147000467e-4	-0.08822429766235332	0.3257568740206061	-0.270828659955684	0.795386499121017	1	0.8395704455380337
ENSMUSG00000024397	Aif1	0.688055113980277	0.15049162588912038	4.572049174930331	4.86000049099784e-6	0.10551061065956312	1.9952005705755157e-4	-0.17281084510346584	0.12388630263655609	-1.3949148648857426	0.16785381789509105	1	0.22851904686635285
ENSMUSG00000033948	Zswim5	-0.12945710782126715	0.028272727936508604	-4.578868657880694	4.8721501327711655e-6	0.10576950723232924	1.996504836174792e-4	0.08129033113899854	0.02326059347022993	3.494765997395465	4.8046410239536617e-4	1	0.001043718319086136
ENSMUSG00000002107	Celf2	0.28261913837920155	0.062089200168257364	4.551824433449353	4.897794685228362e-6	0.10632132702693728	2.0033240724451524e-4	-0.2829472432918174	0.051109616811216854	-5.5360861799636885	2.862755301070578e-8	4.472482606862564e-4	9.608936295314861e-8
ENSMUSG00000045763	Basp1	0.6723357489982965	0.14784828287963106	4.547470798464874	4.958265285459611e-6	0.10762906455147177	2.0243368966378313e-4	-0.23218041743554435	0.1216302757280676	-1.9089031579163478	0.05660442933658312	1	0.0868264964268793
ENSMUSG00000042817	Flt3	0.79158534849229	0.17495219814039198	4.524580753521457	5.175204504235261e-6	0.11233298896893058	2.1090380114237875e-4	0.4198503401472595	0.14312964316180118	2.933356996304664	0.0035609472890834747	1	0.006859547929131364
ENSMUSG00000049988	Lrrc25	0.7512889119935746	0.16594153393620018	4.527431404137942	5.213163725975668e-6	0.11315171867230188	2.1206235112739415e-4	-0.00514128981934969	0.13658203234920963	-0.0376425048809097	0.9703269284404783	1	0.9783290808250977
ENSMUSG00000091897	Gm17019	1.705178001596716	0.3745836128414145	4.552195940078746	5.231867774703917e-6	0.11355245818217381	2.1243483550170957e-4	-0.5427281086697453	0.3072555414077071	-1.7663737037360123	0.0799897824905504	1	0.11870432507651306
ENSMUSG00000029304	Spp1	0.5020039809784403	0.11063069957008845	4.537655306612277	5.245484731208376e-6	0.11384275512141538	2.1259978279438539e-4	-1.1194096914829637	0.0904055708814185	-12.382087525903135	2.62743846370909e-34	5.4430015214197504e-30	3.806193571353578e-33
ENSMUSG00000040613	Apobec1	0.4413184572106653	0.09708827616272489	4.545538088151788	5.473514205738994e-6	0.11878620529294764	2.2127019476407794e-4	0.4002155446018064	0.07990824970663317	5.00843837865447	6.449668467775052e-7	0.009553248934468407	1.928918992963208e-6
ENSMUSG00000029684	Wasl	-0.07810527598507995	0.017145705825079665	-4.555384116694248	5.479298787245829e-6	0.11890626298202173	2.2127019476407794e-4	0.14113824263194752	0.014117734477520807	9.997230282002908	1.7989395280419368e-23	3.5431912944313985e-19	1.566048647827118e-22
ENSMUSG00000060063	Alox5ap	0.47939303416214685	0.10664684275715426	4.495145114176269	5.559739472946636e-6	0.120646346562942	2.2380551253490893e-4	-0.11183855175469641	0.0875047759099046	-1.2780851169751695	0.20494299154132786	1	0.27143967290393367
ENSMUSG00000003731	Kpna6	-0.08311165019040173	0.018245328869986508	-4.555228945591661	5.562197134142494e-6	0.12069411561375797	2.2380551253490893e-4	0.1487644140000268	0.0149640587398741	9.941448144922106	2.71848395935412e-23	5.346442402861748e-19	2.3399994808351457e-22
ENSMUSG00000068335	Dok1	0.358708601193297	0.07903687944091749	4.538496506070217	5.583126371956775e-6	0.12114267601871812	2.2424213881301483e-4	-0.008201062592553408	0.06506819882281258	-0.12603795311571092	0.8999384414412944	1	0.924822400216747
ENSMUSG00000067768	Xlr4b	1.197655665701845	0.2585844030143007	4.63158509075124	5.6384148059483105e-6	0.1223366860446605	2.256507038142686e-4	0.4521588642717551	0.21295836368598986	2.1232266084579323	0.04000203412149758	1	0.06361386944235582
ENSMUSG00000041112	Elmo1	0.3960127243670266	0.08753921948027771	4.52383202315674	5.638478779413659e-6	0.1223366860446605	2.256507038142686e-4	-0.2116383414663494	0.0720579938686166	-2.937055697834577	0.003378728503880148	1	0.006533422085672823
ENSMUSG00000021027	Ralgapa1	-0.10929327785003674	0.024010267183884854	-4.5519392605256765	5.677488157421358e-6	0.12317310557525636	2.2680392996549847e-4	0.051517493229108	0.019725435941122197	2.611729007302088	0.00903332126550685	1	0.01627270332567948
ENSMUSG00000039521	Foxp3	1.009831861520515	0.22070566972394867	4.575468599350344	5.78676607418703e-6	0.1255381032134134	2.3075507511959785e-4	-0.4120890583510121	0.18154812402227427	-2.2698612864787995	0.02698338197562575	1	0.04446802194783355
ENSMUSG00000038708	Golga4	-0.1483414225442515	0.03266924283088188	-4.540705865519049	5.900755225182386e-6	0.12800508309988148	2.3487961451794858e-4	-0.046049691180421716	0.026885326489897617	-1.7128187451145616	0.08670907961198052	1	0.12754437300496982
ENSMUSG00000042029	Ncapg2	0.3280170301496883	0.07224620718605669	4.54026644339877	5.917500423815022e-6	0.12836241919339544	2.3512553916126436e-4	-0.2659695012800582	0.05951128829002531	-4.469227753630018	8.14715076587389e-6	0.11356313452551614	2.180490160263407e-5
ENSMUSG00000044022	Pcdhb21	0.5332803511896538	0.11947325890475159	4.463595921617943	5.969520062860722e-6	0.12948485968351192	2.3676968078202126e-4	-0.13713577938668361	0.0975942656108299	-1.4051622657168277	0.16023436803259358	1	0.21934019828318915
ENSMUSG00000020227	Irak3	0.3706084395631955	0.08270298635176206	4.481197788757956	6.0711070753804175e-6	0.13168231246500126	2.4037046892222362e-4	-0.19903311932302198	0.06797891778858105	-2.927865370584866	0.0035055136767745917	1	0.006763890463225064
ENSMUSG00000035673	Sbno2	0.2241840842059354	0.04988398599474443	4.494109276463082	6.12553416188321e-6	0.13285671043708494	2.4209460148501478e-4	-0.09199087116796363	0.04070472968296287	-2.2599553389606903	0.02410876890418714	1	0.04015301024603803
ENSMUSG00000051457	Spn	0.7364808349377971	0.1617558985233773	4.553038508400109	6.270593493414999e-6	0.1359966316851845	2.473882550035056e-4	-0.10519850967481092	0.1330316202422975	-0.79077823365007	0.43376168967766887	1	0.5147536723742832
ENSMUSG00000076562	Igkv4-50	2.09109491381555	0.40546268622929627	5.157305431141447	6.344162190637677e-6	0.1375858454283593	2.4856527499215434e-4	0.37898855403428633	0.3330275538505009	1.1380096020655928	0.3142756513182692	1	0.3922232047497228
ENSMUSG00000033538	Casp4	0.5722321525608405	0.1273703125603914	4.4926650571695985	6.351834890636731e-6	0.13774589143834814	2.4856527499215434e-4	-0.21555990262102465	0.10456004683034967	-2.0615895760908947	0.04005400137982187	1	0.06368740779637104
ENSMUSG00000020641	Rsad2	-0.252409790740445	0.0566340161085566	-4.456858405673079	6.353178902537939e-6	0.1377686845015352	2.4856527499215434e-4	-0.11861577444631856	0.04627671135630274	-2.5631850442666226	0.01032822779733576	1	0.01839831852682075
ENSMUSG00000074671	Tspyl3	0.43644885878286876	0.09673430945797677	4.5118310269477915	6.353456387791476e-6	0.1377686845015352	2.4856527499215434e-4	-0.12038359548753506	0.0797495040283816	-1.5095215569578015	0.13163356542095878	1	0.18455805213581541
ENSMUSG00000031703	Itfg1	-0.15367881690978324	0.03386173691441096	-4.53842097049606	6.356282480362043e-6	0.13782327302169017	2.4856527499215434e-4	0.21482447935208115	0.027781538411329288	7.732634390918967	1.0537431697686053e-14	1.9042192820888466e-10	5.6079500766613823e-14
ENSMUSG00000079592	C1qtnf5	0.5891705756907036	0.1310505700707964	4.495749811484381	6.398159201156611e-6	0.13872488779947764	2.497639304998873e-4	0.15538067031367708	0.10780481929149165	1.4413146957145384	0.14999817338422025	1	0.2069835259517696
ENSMUSG00000029275	Gfi1	0.9552965144219757	0.21531016240498915	4.4368389478296155	6.41158262238141e-6	0.13900952283585136	2.4984960583294003e-4	0.20525347496984095	0.17706441455457347	1.1592022907944568	0.2505421208818376	1	0.3228032849879426
ENSMUSG00000043753	Dmrta1	0.6425928081208293	0.14207291718031914	4.522978910225723	6.501697909159208e-6	0.14095681067057164	2.52599753906103e-4	-0.14326024566718532	0.11705443204108988	-1.2238771584223	0.2200206224148108	1	0.2886773317620116
ENSMUSG00000062480	Acat3	0.474115400129811	0.10338901643341442	4.585742436530048	6.523054837186979e-6	0.1414133058153765	2.52599753906103e-4	0.19982193278653665	0.08467623094689082	2.3598349920872783	0.019146815916663017	1	0.03249205315448969
ENSMUSG00000037716	Ccdc33	1.5430613317268793	0.3498801423476383	4.410256956491418	6.524307136891273e-6	0.141433930113529	2.52599753906103e-4	0.6492411164139463	0.2879337019463057	2.254828497064987	0.024201145795444204	1	0.04026466988892096
ENSMUSG00000041460	Cacna2d4	0.9088790294214696	0.19996688606306845	4.545147685776405	6.527565435081984e-6	0.14149803593627217	2.52599753906103e-4	-1.1873488501704974	0.16526425455841234	-7.184547277589488	1.314686367648868e-12	2.2932074310899205e-8	6.082987391672897e-12
ENSMUSG00000026875	Traf1	0.47215732602994726	0.10428108973386858	4.527736785594783	6.616136942553755e-6	0.14341138436679518	2.555827484527146e-4	-0.18289754694118374	0.08574324701811126	-2.133083983891477	0.033753526968807276	1	0.05456624008884994
ENSMUSG00000060216	Arrb2	0.2727418818103317	0.06081935777448084	4.484458432160086	6.859557870407896e-6	0.14868091684109114	2.638628195266134e-4	-0.11892562390729582	0.05002325413804174	-2.3774067872336824	0.0175682028740601	1	0.02998466534867771
ENSMUSG00000032093	Cd3e	1.0140869452138446	0.22880611452877667	4.432079742721666	6.8601338723181056e-6	0.14868654154862262	2.638628195266134e-4	-0.2533061196354807	0.18756210524604444	-1.3505186418290258	0.1881790191179424	1	0.2522240439969482
ENSMUSG00000093838	Ighv3-1	1.9108275714439056	0.4175529403059113	4.576252223356344	6.866054222547714e-6	0.1488079931652766	2.638628195266134e-4	1.0040421802161485	0.3434691917094438	2.9232379626802554	0.005664877021443785	1	0.010565731651646744
ENSMUSG00000042351	Grap2	0.7923951669750301	0.17646567211599098	4.490364372137989	6.904522216289183e-6	0.14963480547141916	2.6488366178388035e-4	-0.14590684776532153	0.14529709384636955	-1.0041966009285548	0.3200697088622473	1	0.3984932347747238
ENSMUSG00000031375	Bgn	0.2671611087134349	0.060156020163478756	4.441136697331429	7.047229450447456e-6	0.15272050942064683	2.6989311962462363e-4	-0.26275473252525133	0.0490883941624329	-5.352685436313095	9.004792965526517e-8	0.0013804347616152152	2.8946207494355754e-7
ENSMUSG00000002257	Def6	0.2902250769895562	0.06491998547391244	4.470504342706311	7.111103351502364e-6	0.1540976096270562	2.718714100932631e-4	-0.316891181914612	0.053407905338246076	-5.933413413382499	2.9206792295646135e-9	4.7122238689795475e-5	1.062243111099088e-8
ENSMUSG00000038227	Hoxa9	-0.13344425779472657	0.02992351075549165	-4.459512083495634	7.148980250318463e-6	0.15491125304415077	2.7284495305240344e-4	0.0361447148289272	0.02426713841554658	1.4894510514585984	0.13616663546965946	1	0.19013767215785332
ENSMUSG00000024987	Cyp26a1	0.7563688317179262	0.16673695265340813	4.536299960394328	7.161091752397807e-6	0.15516653609095568	2.7284495305240344e-4	-0.4344206821915002	0.1372011242971034	-3.1663055562925275	0.0017411317328452861	1	0.003513369201735782
ENSMUSG00000004665	Cnn2	0.26954497534791555	0.060599398857594564	4.447981010196689	7.186185998109373e-6	0.1557030920210358	2.733330335793704e-4	-0.3686087359081664	0.04961395330651149	-7.4295376873301695	1.369394045371262e-13	2.427250945420562e-9	6.730812216380815e-13
ENSMUSG00000075284	Wipf1	0.2499378608573388	0.055781372371941605	4.480668908444769	7.20619868389495e-6	0.15612950068526799	2.734182048608834e-4	-0.5683811683314629	0.045914744387977525	-12.37905548441406	5.460413400768057e-35	1.1339094468034946e-30	8.176289271903771e-34
ENSMUSG00000026786	Apbb1ip	0.6068999459161233	0.13541290651605808	4.481847126175919	7.215754043736505e-6	0.15632931135755138	2.734182048608834e-4	0.10985728200775277	0.11150440132893795	0.9852282125050277	0.3259984046693778	1	0.40485723810428487
ENSMUSG00000071203	Naip5	0.6594952716691839	0.14767999028204354	4.465705004514563	7.225288951426877e-6	0.15652865984371186	2.734182048608834e-4	-0.19125127289326327	0.12153964378645868	-1.573571115851596	0.11875210307342601	1	0.16859267820371354
ENSMUSG00000096464	Ighv2-2	1.9167137184190137	0.3821802317594689	5.015208948916351	7.460576097355327e-6	0.16161845999700844	2.8184257850976806e-4	-0.16727327892842117	0.31244340253967506	-0.5353714546978802	0.616686073769114	1	0.6871572045722819
ENSMUSG00000091618	H60c	1.4697147572246065	0.33799669023753753	4.348311092016077	7.502024227900136e-6	0.16250884882477276	2.829280357542474e-4	-0.2875587970923029	0.2765287020815782	-1.039887703980438	0.31421212355452566	1	0.3921659166037553
ENSMUSG00000001494	Sost	0.743338682499095	0.16443341640129136	4.520605961777348	7.592871284319636e-6	0.16446918488964762	2.8586967672994287e-4	0.10845843269737443	0.13524749655576826	0.801925621245436	0.42566358556903466	1	0.506765138710358
ENSMUSG00000094784	Gm8122	1.230186118393906	0.2621736742541404	4.692256466610046	7.648812289737459e-6	0.16567327419571334	2.8748939570768275e-4	-0.1592316457536204	0.21344044703655343	-0.7460237643071965	0.4622030521110891	1	0.5426020952054365
ENSMUSG00000029413	Naaa	0.25833516431664466	0.05772831164899008	4.475016797432427	7.774650042683393e-6	0.1683911452744796	2.9172637116315036e-4	-0.3200622458642087	0.04752314172645688	-6.734871353970798	1.9253179187189807e-11	3.286325155461428e-7	8.265531354315268e-11
ENSMUSG00000060771	Tsga10	-0.23871735517380213	0.053326408181286124	-4.476531671930145	7.791286150452766e-6	0.168743675446506	2.918584312015564e-4	0.411512919753411	0.04392148331032987	9.369285569110719	1.0328142012549735e-20	1.9940543783629774e-16	7.803446109380108e-20
ENSMUSG00000025437	Usp33	-0.09460970110864242	0.02111605471511427	-4.48046296455765	7.813973362521473e-6	0.16922722111212754	2.922163383016223e-4	-0.011272061989306123	0.017296416667004377	-0.6516992627038956	0.5145481741188473	1	0.5926399618157498
ENSMUSG00000031996	Aplp2	-0.08706198547402744	0.019525739325201397	-4.458831700250072	7.862584766695888e-6	0.17027213570756616	2.935408953754198e-4	-0.27187604469843063	0.015997980095925523	-16.99439823454174	5.911529630428514e-65	1.2874129229147216e-60	2.775051599296727e-63
ENSMUSG00000020120	Plek	0.7158235076891735	0.15967786914769025	4.482922470784536	7.942442750711456e-6	0.17199359776665657	2.960256174976225e-4	-0.1834403855892628	0.13139646809090388	-1.3960830778370192	0.16470173673518892	1	0.22473651463142752
ENSMUSG00000028211	Trp53inp1	0.274017381207309	0.06110062347764581	4.484690427218973	8.041230687866761e-6	0.17412480931506685	2.9920639470856737e-4	0.4960470472782858	0.05028128830247867	9.86544028653762	1.0983015114913152e-22	2.1520119816160832e-18	9.194246400373685e-22
ENSMUSG00000031497	Tnfsf13b	0.5186056060747414	0.11766404753280665	4.407511189262342	8.185700362592684e-6	0.17724496995121938	3.0407348709190286e-4	-0.09675159850767992	0.09631367986352413	-1.0045467958941692	0.318284711251021	1	0.3966926068473908
ENSMUSG00000030844	Rgs10	0.47616435450951045	0.10806115750577548	4.406433962953443	8.33353192031325e-6	0.1804376331386225	3.0904903126481684e-4	0.07582050760135943	0.08877463472289748	0.8540785083264688	0.3943680353506818	1	0.47494496398506286
ENSMUSG00000052384	Nrros	0.40752686992985576	0.09182028668221805	4.438309709707948	8.373334706674087e-6	0.18129106973420064	3.1000843686889367e-4	0.05450921486675111	0.0755686889057232	0.7213201083156923	0.471975152547166	1	0.55201152546348
ENSMUSG00000020159	Gabrp	1.1614370868306674	0.2514412772891111	4.619118624247319	8.4267831393552e-6	0.18243985496704007	3.110944746667697e-4	-0.7745345742230625	0.20633422485030928	-3.753786240673206	2.840144243846465e-4	1	6.372496679421972e-4
ENSMUSG00000024670	Cd6	1.107278261686393	0.250237152397057	4.424915529447239	8.430630903063329e-6	0.182514728420418	3.110944746667697e-4	-0.29548871318041103	0.2053390226593535	-1.439028536093751	0.16727274795983385	1	0.22781159963607928
ENSMUSG00000037411	Serpine1	0.7128787840374272	0.1597682928574608	4.461954066652202	8.512043652206723e-6	0.18426872098297115	3.1357861474379435e-4	-0.37875148320287966	0.1311854482929974	-2.8871455495349876	0.004092562055698311	1	0.007818631261384315
ENSMUSG00000022901	Cd86	0.5888920348870136	0.13245518506252804	4.44597193087621	8.563610119970033e-6	0.1853764682669913	3.1495684095777393e-4	-0.1997984508931751	0.10906204843981958	-1.8319704585727075	0.06929016989086925	1	0.10429382197400608
ENSMUSG00000038970	Lmtk2	-0.12322545285816053	0.02762120219510687	-4.46126319874629	8.72771246922081e-6	0.18892006410875364	3.204625910109443e-4	0.18415226608292073	0.02270840841725145	8.10943077556335	5.81951307830791e-16	1.0707904064086554e-11	3.3616299456238136e-15
ENSMUSG00000040797	Iqsec3	0.7804332215270576	0.17691599917298212	4.411320769038972	8.838793036444162e-6	0.1913156752738339	3.238739021746414e-4	-0.10822557914583748	0.14546220764598197	-0.7440116639040089	0.46087261540372193	1	0.541297258661822
ENSMUSG00000103442	Pcdha1	1.8442298105512696	0.39773289827359015	4.636855081780717	8.856843077184816e-6	0.19169751156258816	3.238739021746414e-4	-0.2600760534654002	0.3217514479767546	-0.8083135448210625	0.42847838609140204	1	0.5095164904296594
ENSMUSG00000025058	5430427O19Rik	0.800037558984736	0.17709249589232645	4.517625407861239	8.864285039969287e-6	0.1918497211200553	3.238739021746414e-4	-0.16605428257967084	0.14545504164273063	-1.1416192983364335	0.25853478191110896	1	0.33164172906169065
ENSMUSG00000019194	Scn1b	0.21750108835131707	0.04929954977475602	4.411827072357751	9.006704452905112e-6	0.19492309776977246	3.285380012812978e-4	-0.14595792563327736	0.04042613347560636	-3.610484433821756	3.027316281412266e-4	1	6.763133993745416e-4
ENSMUSG00000031093	Dock11	0.41732819106727304	0.09392564561416392	4.443176177692839	9.148683317236027e-6	0.19798665566830487	3.331707896756446e-4	-0.3018152068338309	0.07733743195432861	-3.9025760127652926	9.901828550742095e-5	1	2.3541573574373581e-4
ENSMUSG00000031933	Izumo1r	1.9806872025974966	0.44468170653626504	4.45416839389584	9.212266176070025e-6	0.19935344005015534	3.347825658973201e-4	-0.3036785388107965	0.3647174665079305	-0.8326405140900847	0.42563120640475327	1	0.5067537039816024
ENSMUSG00000040446	Rprd1a	-0.12684945441622827	0.028659573772695564	-4.426076096675233	9.223033252215956e-6	0.19957721654470106	3.347825658973201e-4	-0.039254419144583864	0.02351115087767787	-1.6696085763225263	0.09497297416799111	1	0.1383465563477558
ENSMUSG00000031886	Ces2e	0.4408311139295172	0.09959541809399099	4.426218819760288	9.255226335025338e-6	0.20026458743727826	3.3540397586424885e-4	0.2102399909734463	0.08194072795925252	2.565756934426973	0.011161777752517072	1	0.01976450077759489
ENSMUSG00000031430	Vsig1	0.7744246542796243	0.17594572041920065	4.401497532503283	9.270804652753058e-6	0.2005924002716179	3.354222346803387e-4	-0.20570955112060318	0.14498775279633555	-1.4188063967689988	0.15531589191266634	1	0.21356654992885546
ENSMUSG00000096452	Ighv1-77	2.6006273539375893	0.5006293750795201	5.19471585846217	9.294852894146189e-6	0.20110343721774693	3.355791240360986e-4	-0.29768988895808046	0.41057331674196695	-0.7250590255605179	0.5224994551111968	1	0.6000895724000846
ENSMUSG00000034557	Zfyve9	-0.09784070748810844	0.022053403944883105	-4.436535408893634	9.31291688560521e-6	0.20148495682006873	3.355791240360986e-4	-0.09777629195961418	0.018159289154107933	-5.384367809215459	7.004669948589849e-8	0.0010780187050879778	2.2713627371913834e-7
ENSMUSG00000024803	Ankrd1	0.5880265366821276	0.133447853491886	4.406414350590369	9.320385540169382e-6	0.20163722077602442	3.355791240360986e-4	-0.6248466813294049	0.10905870217211314	-5.729452752365335	1.4567858400693334e-8	2.3005561986374912e-4	5.0177928370561514e-8
ENSMUSG00000068129	Cst7	1.3858359914496754	0.305426649419988	4.537377449156479	9.37475348502106e-6	0.2028040421414606	3.369913405415245e-4	-0.3428557466675246	0.2510539489454344	-1.3656656193129348	0.18809203248894266	1	0.25216821202093526
ENSMUSG00000106683	Gm43263	0.6852082331872621	0.15771905462851354	4.344486053388919	9.450527823205191e-6	0.2044338178715747	3.39167249345385e-4	0.24682759692892553	0.12850918909646142	1.9206999800119513	0.055786611414789085	1	0.08568426110240021
ENSMUSG00000031103	Elf4	0.35515850683812406	0.0807129528106264	4.400266555374555	9.486313205520468e-6	0.20519844094861323	3.399033093978034e-4	-0.21861695036715362	0.06625310609096355	-3.2997237905646117	9.90293104665832e-4	1	0.002066686538352976
ENSMUSG00000023927	Satb1	0.22696539012031175	0.05131878685951995	4.422656964624023	9.532274609827778e-6	0.20618309981057484	3.404636678777244e-4	-0.23761778947447404	0.042283904375817596	-5.6195801447883555	1.8821477064815074e-8	2.9626887047725406e-4	6.43214077974505e-8
ENSMUSG00000018623	Mmp7	1.5639974947315782	0.3341676164018792	4.6802784529865145	9.532554271170839e-6	0.20618309981057484	3.404636678777244e-4	0.34206660548293477	0.2752650325172824	1.2426809259234852	0.24426857576895158	1	0.3159827963161992
ENSMUSG00000048215	A630023P12Rik	1.8413858382734978	0.4010971024552966	4.590872950718275	9.566742355453623e-6	0.20690950366375097	3.4113715408845926e-4	-0.24288513346540774	0.3286443420399318	-0.7390516202341803	0.4785275806071013	1	0.5579687258863183
ENSMUSG00000021998	Lcp1	0.4244471516762054	0.09617175745691149	4.413428254821832	9.6619574966827992e-06	0.2089591547807589	3.4398114601390234e-4	-0.2094622693368799	0.07914379424292524	-2.6466038347106915	0.008346712119197153	1	0.015120303782810051
ENSMUSG00000040204	Pclaf	0.6418859847565153	0.14411329741436313	4.454037179587436	9.69990124788711e-6	0.20977006438680665	3.4401408094428775e-4	-0.14431080093755766	0.11869387598753336	-1.215823476459012	0.2287724739139846	1	0.2984531142741599
ENSMUSG00000029095	Ablim2	0.2173671582057541	0.049148321389808236	4.422677154765025	9.705869790950354e-6	0.2098894342293014	3.4401408094428775e-4	-0.3776738916389012	0.040478569332102206	-9.330218381492564	8.652075765634425e-21	1.6719271209511962e-16	6.575045691978538e-20
ENSMUSG00000089911	Mfsd14a	-0.08277863643654648	0.018658524524012544	-4.436504951397133	9.709264430048658e-6	0.2099531340353722	3.4401408094428775e-4	0.07876077018289687	0.015307999713699718	5.145072619279633	2.7838299336190577e-7	0.004187158603156425	8.590070704889426e-7
ENSMUSG00000056069	Otulinl	0.41840507626911994	0.09464657395713579	4.420710214599106	9.850792177627577e-6	0.21300367925684108	3.4847373091318156e-4	-0.22943980848734344	0.07792479684548653	-2.9443748046246307	0.0034092572672357905	1	0.0065878752456155956
ENSMUSG00000031004	Mki67	0.8893143040329097	0.19742687455297822	4.50452506046368	9.879165101507549e-6	0.21360730782479623	3.489227026565785e-4	-0.25427240519673	0.16236446816995756	-1.5660594221302555	0.12566141777121953	1	0.17717264774638
ENSMUSG00000076522	Igkv16-104	1.8778535211622374	0.3753560849728276	5.002858875454696	9.900026641380167e-6	0.21404847601328061	3.491053768579241e-4	-0.7850429477625986	0.3063607386971753	-2.562478962222965	0.020572052266413447	1	0.03469633403926064
ENSMUSG00000020736	Nt5c	0.1570509659621182	0.035574530950339196	4.414702366177529	1.0046142391913236e-5	0.21719759851316417	3.536973328519959e-4	0.03521253402306312	0.029248394222538266	1.2039134099173552	0.22784231262051996	1	0.2974489144636933
ENSMUSG00000058755	Osm	1.140852761770335	0.25987714134634327	4.389969644347821	1.0090196226866705e-5	0.2181399522286313	3.546871346666841e-4	-0.2522359936880143	0.21325992177372607	-1.1827632289748413	0.24056750411584024	1	0.31177514905245274
ENSMUSG00000066363	Serpina3f	1.2135111862281183	0.2697359860208472	4.498885017642137	1.0140267651401039e-5	0.21921230608798764	3.558850086929409e-4	-0.536082182039973	0.2218540545016804	-2.4163731568670186	0.019963971802781234	1	0.03375519274952016
ENSMUSG00000000782	Tcf7	0.6479792060293764	0.1460398310718069	4.437003256397694	1.0199354668581782e-5	0.2204794498707324	3.567773100166188e-4	-0.19675042730891149	0.12011262660378447	-1.6380494946458222	0.10398278813816271	1	0.1497844901186158
ENSMUSG00000095200	Ighv1-7	1.8228516829282866	0.3713558830697875	4.908638225574374	1.0208062034796841e-5	0.22065746894416852	3.567773100166188e-4	0.1945219771208984	0.3032117554756726	0.6415383757655971	0.5525012521609903	1	0.6276900017101799
ENSMUSG00000025930	Msc	1.6173445473575006	0.36370636299468545	4.446841496092092	1.0213794727454325e-5	0.22077117303392524	3.567773100166188e-4	-0.6558664855069446	0.29862862820318775	-2.1962612541644573	0.038067367978847196	1	0.060863476675815834
ENSMUSG00000005312	Ubqln1	-0.09142617565889957	0.02072338069926766	-4.411740390511209	1.041231417296802e-5	0.22505175853453077	3.6314169696349753e-4	0.16437077227244873	0.01705408452711373	9.638205557801772	5.597270122066248e-22	1.0912437829980356e-17	4.5190441758380296e-21
ENSMUSG00000019823	Mical1	0.34065238926237995	0.07758936947730398	4.3904518306728315	1.048320795245026e-5	0.2265735734763075	3.65042034663491e-4	-0.058130563075580885	0.06385895606467733	-0.9102961692124337	0.36211753329575075	1	0.44223255946013995
ENSMUSG00000039747	Orai2	0.4216815671554708	0.09562002662436839	4.409971237636185	1.0562101254602205e-5	0.22826813231446286	3.672145547127401e-4	-0.42882944317527544	0.07870726644017782	-5.448409817424052	5.8913538333809245e-8	9.090948100290105e-4	1.921837181447866e-7
ENSMUSG00000002111	Spi1	0.6040640491992065	0.13765361277863822	4.388290557768406	1.0594441505932768e-5	0.22895647538471303	3.677643025717785e-4	-0.02487008803418565	0.11326822830303013	-0.21956808547980378	0.8277476584278656	1	0.8670215699187869
ENSMUSG00000028459	Cd72	0.6766807926175101	0.1519349529845512	4.453753262992191	1.0647348904092836e-5	0.23008920981744618	3.690251720638157e-4	0.006954101694194643	0.12479261509061418	0.05572526618778798	0.9556992950929896	1	0.9678993363453304
ENSMUSG00000030742	Lat	0.7680694355181229	0.17378034564137454	4.419771595478153	1.0775190755499329e-5	0.232841097035585	3.728752247287956e-4	-0.20681193301431122	0.14306211888755319	-1.445609324274481	0.1553036519890912	1	0.2135629170267146
ENSMUSG00000026686	Lmx1a	1.1133459888207553	0.2530378450168996	4.3999188688411355	1.08294673226707e-5	0.23400312990826846	3.741715487527108e-4	0.12620137707513693	0.20742232228375218	0.6084271725706281	0.5455203476194024	1	0.6211110502419956
ENSMUSG00000038608	Dock10	0.41703595827808104	0.09553650381835734	4.365200123619633	1.0872034579546725e-5	0.2349120511602661	3.750599091930143e-4	-0.1462482922214865	0.07847296702497142	-1.8636773626126284	0.06402363060908309	1	0.09710243369113951
ENSMUSG00000035580	Kcnh8	1.566441434995874	0.36617209251877486	4.27788317842807	1.0908486613062494e-5	0.23568876176182824	3.757348848719095e-4	0.1725185770210658	0.29786242789721296	0.5791887826839272	0.572489208577671	1	0.6460130673966129
ENSMUSG00000034009	Rxfp1	1.2049697495003244	0.2757670003773753	4.36952118219865	1.0986239432039195e-5	0.23735770292920683	3.772881845177676e-4	-1.0485107992963851	0.22957372928467265	-4.567207243456965	4.2388663145566164e-6	0.06006897454358181	1.1671700824798822e-5
ENSMUSG00000091199	Gm2619	1.3303161940383945	0.299600600954599	4.440298817157541	1.098749465495993e-5	0.23737383452575433	3.772881845177676e-4	-0.44479419434321665	0.2462530883057435	-1.8062481871941765	0.07614006225628783	1	0.11361269616849924
ENSMUSG00000006731	B4galnt1	0.5144880213166461	0.11790156247281683	4.363708253953509	1.117593101162083e-5	0.2414336376440448	3.8316739744156405e-4	-0.29059565860312725	0.09672481793906172	-3.004354671271725	0.002801447018123032	1	0.005480481589612765
ENSMUSG00000031740	Mmp2	0.4947651180603939	0.1159014758132156	4.268842260971267	1.1312975172405813e-5	0.24438288967431038	3.8726924701723347e-4	-0.28676756705239204	0.09361292317427787	-3.0633331096660754	0.0024179708276434327	1	0.004777752320921235
ENSMUSG00000040212	Emp3	0.3463205980449797	0.07953873651012301	4.354112389010642	1.1391274207921541e-5	0.2460629141653132	3.89350602765687e-4	-0.27823245558802695	0.06534321385522776	-4.258016084186943	2.000151562687648e-5	0.271880601916132	5.139782009627307e-5
ENSMUSG00000024087	Cyp1b1	0.2961855578857096	0.06828853358274098	4.337266336622091	1.1484181001430419e-5	0.24805830963089706	3.914225790997663e-4	-0.201749702098325	0.05581205172024723	-3.614805331106206	3.0571808581657034e-4	1	6.828481356659814e-4
ENSMUSG00000018865	Sult4a1	1.2929240064716259	0.2871443010632361	4.502697778379007	1.1487076722491008e-5	0.24810937012908327	3.914225790997663e-4	-0.21502252402418104	0.23510676838979094	-0.9145739422851851	0.36170012343199565	1	0.4418197983358221
ENSMUSG00000005763	Cd247	0.7483073028820206	0.16992824302898482	4.403666450869978	1.1627502913283379e-5	0.25113080792109443	3.9560178489826984e-4	-0.25301639774608337	0.13988239385868484	-1.808779437973383	0.07379977801192711	1	0.11037970427797204
ENSMUSG00000030786	Itgam	0.7926583859769564	0.18014089742324602	4.4002133736160065	1.1738027898546822e-5	0.2535061885249157	3.973799673686528e-4	-0.040983498508332356	0.1480800876270642	-0.27676576348028786	0.7847814072310335	1	0.831096620451084
ENSMUSG00000015355	Cd48	0.700375366328177	0.15983020979427257	4.381996164740532	1.1747640177588186e-5	0.25370203727519447	3.973799673686528e-4	-0.17588244913180762	0.13158922483713692	-1.336602213057268	0.18420575667548625	1	0.24768928521792632
ENSMUSG00000029622	Arpc1b	0.29326221873108543	0.0676409527920807	4.335571966771884	1.1766227219084341e-5	0.2540916767961264	3.973799673686528e-4	-0.19567738571841073	0.05516607515603443	-3.5470601300699247	3.9698586783719976e-4	1	8.732904147548721e-4
ENSMUSG00000026417	Pigr	0.801364744877515	0.17910361447873266	4.474308054641028	1.1778523634484917e-5	0.2543454393630673	3.973799673686528e-4	1.5601374707166615	0.14729784953952002	10.591719265379204	3.326101719368778e-24	6.581690082286938e-20	3.003615639516017e-23
ENSMUSG00000024678	Ms4a4d	0.8109236547736708	0.18589066908434818	4.362368798649667	1.1783413193630404e-5	0.25443924109006133	3.973799673686528e-4	-0.4536964527384089	0.15299872918369484	-2.9653609226628768	0.003511449550269767	1	0.0067735816162160884
ENSMUSG00000049588	Ccdc69	0.493083978525277	0.11226541223180346	4.392127269859097	1.1786920968195176e-5	0.25450319754527023	3.973799673686528e-4	-0.30732867295061533	0.09249276545804845	-3.322732015078618	8.973564637138907e-4	1	0.0018810248397642753
ENSMUSG00000076512	Igkv9-123	2.132674992824609	0.4500074001268648	4.739199826988115	1.2015343039605466e-5	0.2594232715681216	4.0446807560402603e-4	0.7766930895613323	0.3694185077199684	2.1024747632571015	0.04334679322241751	1	0.0683095464491796
ENSMUSG00000023267	Gabrr2	-0.4286039591950687	0.09790745139297802	-4.3776439187937894	1.2083328736960667e-5	0.26087906743098077	4.0614221710893024e-4	-0.35452311882478843	0.08068739977516104	-4.393785396637921	1.0508342088098895e-5	0.1454354544992887	2.779613882575945e-5
ENSMUSG00000099693	Gm29284	1.8934556053217735	0.41974702195349256	4.510944703096824	1.2180710796203709e-5	0.26296936537924187	4.087978822418231e-4	0.7081006651745706	0.34486010266680195	2.0532983076291824	0.05425682401849514	1	0.08359936114149655
ENSMUSG00000095197	Ighv1-59	2.350834292525109	0.4998659084609	4.7029298312489205	1.2242352317472996e-5	0.26428790182960704	4.099129387172305e-4	-0.7108490410107844	0.411130815552833	-1.7290093909767648	0.12821597979647584	1	0.18030296191944536
ENSMUSG00000015340	Cybb	0.6289309773175915	0.14355039504843412	4.381255635732589	1.2250779931102345e-5	0.26445758637270633	4.099129387172305e-4	-0.10441238367833015	0.11811010390526618	-0.8840258388230469	0.3783408238959784	1	0.4587967558182689
ENSMUSG00000027953	Slc50a1	0.1291334830481525	0.029623963171979812	4.3590886978382075	1.2411863912633964e-5	0.2679224944181168	4.146792551351626e-4	0.0166210742850786	0.024380831982277522	0.681727116497111	0.49477375867965445	1	0.5736952008536212
ENSMUSG00000057058	Skap1	0.49323317590877325	0.11166719676470574	4.416992547489718	1.25605133914366e-5	0.271118681554159	4.190164669757958e-4	-0.4910298205009716	0.09164883759826525	-5.357731023860426	9.132534125827003e-8	0.0013987389267116639	2.929758028168637e-7
ENSMUSG00000050010	Shisa3	0.4126632154128019	0.09511514354794268	4.3385648175445315	1.2730101516232298e-5	0.2747665111263579	4.24038156942642e-4	-0.5695907869829653	0.07818368101696177	-7.285289968112321	3.993926123727639e-13	7.026913622086408e-9	1.9078757015685635e-12
ENSMUSG00000099398	Ms4a14	1.0598083234485036	0.24208132170178848	4.377902086779105	1.27891286896638e-5	0.2760277645090138	4.2536756722527533e-4	-0.24179453971891496	0.19900814974531786	-1.2149981798652634	0.23027871733071725	1	0.3001190030648269
ENSMUSG00000004270	Lpcat3	-0.10984382294990992	0.025111971428741442	-4.374161672714799	1.291275453137231e-5	0.2786830682960772	4.2856287182407426e-4	0.09499335270364886	0.020569839834804	4.618089079280087	3.6933399142640663e-6	0.05252668026066355	1.023418510987419e-5
ENSMUSG00000040061	Plcb2	0.4623087455293794	0.1069310653641927	4.323427845358302	1.2942871134650634e-5	0.27932010195689533	4.2856287182407426e-4	-0.03004260927117665	0.08780041236691921	-0.3421693413651424	0.7344969843100605	1	0.7893784968065667
ENSMUSG00000040345	Arhgap9	0.5447855857621371	0.12541563631064684	4.343841021646907	1.2942980084750252e-5	0.27932010195689533	4.2856287182407426e-4	-0.07066280120278065	0.10321293808781035	-0.6846312343386926	0.49653910914115257	1	0.5752924612080076
ENSMUSG00000019916	P4ha1	-0.2307856054834907	0.05369097545289309	-4.298405896647851	1.3004182928874232e-5	0.2806172634221771	4.2994959041661295e-4	-0.15581146122570927	0.043610986580387694	-3.5727570835505764	3.620013205922036e-4	1	7.996516811771192e-4
ENSMUSG00000029283	Cdc7	0.4494682685920932	0.1021036969329532	4.4020763409501065	1.309721239187812e-5	0.2826116489919461	4.323828975247478e-4	-0.513656244588469	0.08398045845118302	-6.1163781915652695	9.28904225689047e-10	1.5218237929463657e-5	3.521732480117053e-9
ENSMUSG00000027194	Ttc17	-0.08429535828712954	0.019373935478900917	-4.350967224957003	1.3323545446354335e-5	0.2874821400959875	4.3920327366937827e-4	0.10020710016437827	0.015958386753450692	6.2792750741368275	3.454685256710072e-10	5.7244134703685895e-6	1.3528722570759559e-9
ENSMUSG00000026395	Ptprc	0.6617359388530524	0.15161218882457858	4.364661865140062	1.3382744726186554e-5	0.2887461002122011	4.405021492638713e-4	-0.13031244967275007	0.12474796054825994	-1.044605852472734	0.30087791271986786	1	0.37757793897297276
ENSMUSG00000028965	Tnfrsf9	1.0340200834536646	0.23995948739948747	4.309144408748529	1.3437815099174066e-5	0.2899208607646805	4.416614826761036e-4	0.15457807673123566	0.1973152477084973	0.7834066476180331	0.44364433162826566	1	0.5243379577935038
ENSMUSG00000031465	Angpt2	-0.24169171944632753	0.055823015880733004	-4.329606984379109	1.352143635724927e-5	0.29171146797129577	4.43754395848309e-4	-0.6059398396894489	0.04586894724839659	-13.210240828246398	1.063190023607995e-39	2.2369518096712217e-35	1.9519010903714107e-38
ENSMUSG00000033585	Ndn	0.5665543827739827	0.1282210870821682	4.418574164879108	1.3599944467782858e-5	0.2933916020034796	4.4567358520270455e-4	-0.13411740808300765	0.105331759199376	-1.2732855608074016	0.20506647364250807	1	0.2715708906689351
ENSMUSG00000095583	Ighv14-2	2.2870667582430815	0.47782887421024683	4.786372029156116	1.3621909890203264e-5	0.2938518401514648	4.457369367160482e-4	-0.8330448540905214	0.39318380519255053	-2.118716089241167	0.05876722762249912	1	0.08979122308784096
ENSMUSG00000050370	Ch25h	0.5585743659996878	0.12940670915531555	4.316425088356739	1.385830269866247e-5	0.2989374475128481	4.5280630447568077e-4	-0.08843866601230493	0.10603423408237667	-0.834057668050849	0.40668368217442635	1	0.48719277549602463
ENSMUSG00000049866	Arl4c	0.30643455258118113	0.07078754234308837	4.3289333467176245	1.3953740564626882e-5	0.30098218397900184	4.5525613094356704e-4	-0.384592466148603	0.05817790360454505	-6.61062778684513	5.051273560154802e-11	8.542713844933802e-7	2.1047919098689982e-10
ENSMUSG00000104346	Pcdhga3	0.48155297728832125	0.11064808594668415	4.352113036282958	1.4077109942025974e-5	0.3036291843395582	4.5858924566918814e-4	-0.29944960775219254	0.09124846153364255	-3.2816948660749525	0.0010665995329307975	1	0.002213684004033502
ENSMUSG00000062184	Hs6st2	-0.4090235779768732	0.09531580524659065	-4.291246104659055	1.409712120973101e-5	0.3040467102514784	4.5858924566918814e-4	-0.09923852798811056	0.07781164007883484	-1.275368670902799	0.20285223020715046	1	0.2690228259827932
ENSMUSG00000020167	Tcf3	0.09816179996931634	0.022719584523113068	4.320580768959681	1.4209114796292866e-5	0.30644797881164826	4.615576836968067e-4	-0.05487108632947057	0.018498932240348587	-2.9661758644528446	0.0030062474520232635	1	0.0058492490429319375
ENSMUSG00000035910	Dcdc2a	0.4400287156806914	0.10023538142257195	4.389954020583011	1.4243345001206818e-5	0.3071719782960262	4.6199514522135993e-4	-0.24055507476957652	0.0824849471624204	-2.916351201582291	0.0035751121425459482	1	0.00688504589612168
ENSMUSG00000046805	Mpeg1	0.6286546189205358	0.14566371521586138	4.315794211268897	1.4281506750031525e-5	0.3079806930644298	4.62558670589449e-4	-0.06334364515584047	0.11976558204541608	-0.5288969007124271	0.6000875540206454	1	0.672063024185292
ENSMUSG00000029484	Anxa3	0.29936938245665135	0.06924367391156325	4.323418523965098	1.4311658874012592e-5	0.30861661195920753	4.628615139617067e-4	-0.36995145645052074	0.05682747590593489	-6.510080740923496	7.192367887540673e-11	1.2119139890506035e-6	2.9625579019931044e-10
ENSMUSG00000005540	Fcer2a	1.123593771879524	0.24660239317961075	4.556297112093166	1.4416983311019154e-5	0.31087341113550604	4.6559114028082326e-4	0.4310916955429441	0.20240704653416752	2.1298255318901322	0.04238239677368561	1	0.06696376557631745
ENSMUSG00000050357	Carmil2	0.6689071549262403	0.15474635328045752	4.32260367204863	1.4467788039120873e-5	0.3119544456995243	4.6655471254851964e-4	-0.05947211821089616	0.12737742760790507	-0.4668968382213216	0.6429981168884713	1	0.710183576267257
ENSMUSG00000094561	Ighv1-22	1.7330300684351208	0.3744815879824912	4.6278111502671475	1.4492963677335001e-5	0.31248278984701994	4.666902095287715e-4	-0.07790612160843312	0.30779809272840547	-0.2531078763934247	0.8196688882338707	1	0.8602637815240723
ENSMUSG00000025017	Pik3ap1	0.7558780792576643	0.17528146754363733	4.312367358913652	1.4555594533578595e-5	0.3138186181439545	4.67398182315189e-4	-0.1474334548082825	0.1442338356667028	-1.0221835544121103	0.3104450823279824	1	0.38813921036578847
ENSMUSG00000076680	Ighv6-6	1.860007744390955	0.3836006169288039	4.848813224761241	1.4572232888896904e-5	0.31416276885172834	4.67398182315189e-4	0.476718272627389	0.31502498760292236	1.5132713003334046	0.14696198338524483	1	0.20343729577610317
ENSMUSG00000034266	Batf	0.9036401139183963	0.20782555464083757	4.348070262485573	1.4577966766740424e-5	0.3142718075573901	4.67398182315189e-4	-0.4323370448254252	0.17116102169265923	-2.525908297052233	0.013119780503493654	1	0.022935907918230462
ENSMUSG00000094689	Ighv1-81	2.0188611773035143	0.4495868319642947	4.490481112364626	1.4625208599096785e-5	0.3152756217707294	4.682381532928095e-4	-0.46206587023007684	0.3697828414383858	-1.2495600618804468	0.2182605026573456	1	0.28665532077845574
ENSMUSG00000031079	Zfp300	0.339143413947445	0.07865390504699998	4.311844577135597	1.4678433985105882e-5	0.3164083229829424	4.6901219261862004e-4	-0.2953455887664583	0.06473284383608391	-4.562530722647232	4.969234772956891e-6	0.07014074882028651	1.3588600581671842e-5
ENSMUSG00000062939	Stat4	0.7651215577252838	0.1744514153326404	4.385871884537971	1.469154187475521e-5	0.31667618511034856	4.6901219261862004e-4	-0.1019181301059048	0.14361256406610323	-0.7096741901982409	0.48284499440978584	1	0.562266274367393
ENSMUSG00000032038	St3gal4	0.200899866209762	0.0462180636011035	4.346782417015094	1.4727326951174737e-5	0.3174328051056203	4.6948102004382386e-4	-0.33555881995297676	0.03801494437401011	-8.8270238317747	1.0581459295682366e-18	2.0043400197881538e-14	7.113234162786354e-18
ENSMUSG00000051811	Cox6b2	0.5603657729115626	0.12805254267066346	4.376061273166278	1.4808974173646102e-5	0.3191778203645944	4.7140841822288903e-4	-0.5817027851737333	0.10531116447271187	-5.523657326232145	4.714172437822233e-8	7.302253106186639e-4	1.5512429889675024e-7
ENSMUSG00000020333	Acsl6	0.6089472350971121	0.14142649085613104	4.305750863298843	1.4946526783651187e-5	0.32212754524125037	4.7510738209003225e-4	-0.4712588080534772	0.11650373462811196	-4.045010312826178	5.241043247071595e-5	0.6901405747743876	1.283778657976553e-4
ENSMUSG00000004798	Ulk2	-0.10568101832130995	0.024339005288388137	-4.342043442988575	1.528055201577482e-5	0.3293111764919631	4.8503218673752566e-4	0.049162484837578166	0.0198662461390689	2.4746741026678096	0.013338791684640357	1	0.02328921431593052
ENSMUSG00000030717	Nupr1	0.34867359506612966	0.07988695875728151	4.364587167794128	1.5534234866781162e-5	0.334762761379134	4.923821367816917e-4	-0.40573381665687347	0.0656551063613064	-6.179775483480006	7.018854966882864e-10	1.153408436707861e-5	2.6839068889518924e-9
ENSMUSG00000020399	Havcr2	0.6560351587909881	0.1509585781179438	4.345795826709685	1.566188123286697e-5	0.33749787868705033	4.957219335882261e-4	-0.08530359011377725	0.12430508163720907	-0.6862437881883242	0.49336557515202606	1	0.5724501962094035
ENSMUSG00000026692	Fmo4	0.19534065057013306	0.04503836920547863	4.33720523225275	1.579695350032635e-5	0.34039275402503216	4.992869493405704e-4	0.20130028210455692	0.03693519505652107	5.450093922517852	4.96049976777802e-8	7.674389190729375e-4	1.6277257090816803e-7
ENSMUSG00000032269	Htr3a	0.6123066691106326	0.1389593665966603	4.406372050384321	1.5823981640561735e-5	0.3409593324091837	4.994317950129634e-4	-0.6165249306728292	0.11424563884411783	-5.396485475599161	6.596703773141198e-8	0.00101661801847879	2.145640339952709e-7
ENSMUSG00000028678	Kif2c	0.6700522177665191	0.15436584107189552	4.340676752795613	1.590259247033243e-5	0.34263725736578254	5.012019618376301e-4	-0.04097687618471557	0.12713017276043082	-0.3223221938188823	0.7485035121309146	1	0.8017068405568881
ENSMUSG00000074141	Il4i1	0.7904343613995165	0.1798644120654912	4.394612321150602	1.594523962342285e-5	0.3435401876866453	5.018352572288286e-4	0.01822388436333091	0.14795071096792445	0.12317537539432188	0.9040056600331748	1	0.928114702228495
ENSMUSG00000058488	Kl	-0.20136988039002063	0.04640378796680089	-4.339513846026722	1.597163242617007e-5	0.344092848989408	5.019559224784043e-4	0.3178934484810786	0.03814271758347912	8.334315660265613	1.0200291339775928e-16	1.8926640580954236e-12	6.139212404689049e-16
ENSMUSG00000043157	Arl11	0.7529549068369104	0.17397127765563236	4.328041484683165	1.599713700034754e-5	0.344626322398487	5.020483715017391e-4	0.058072249519517075	0.14332453439488363	0.4051801023788299	0.6858726492427744	1	0.7471640986366993
ENSMUSG00000046456	Tmem150b	0.5656453414580599	0.1329507527297935	4.2545478671163774	1.6160386997634786e-5	0.34812705670304855	5.063550233268615e-4	-0.014193046433035122	0.10885104285477108	-0.1303896229269155	0.8961958352246131	1	0.9217552708506457
ENSMUSG00000036067	Slc2a6	0.6888699391022928	0.1618172688618381	4.257085439320199	1.6179876031881648e-5	0.34853070960276256	5.063550233268615e-4	-0.13195064302881201	0.13273227777936208	-0.9941111931202645	0.324002218560677	1	0.4029158534171813
ENSMUSG00000025355	Mmp19	0.709402450904173	0.16585451761181882	4.277257328404667	1.6236521138843222e-5	0.349734665330683	5.074140896915738e-4	0.46298604238296376	0.1362321746315205	3.3985073176380256	7.660043070405807e-4	1	0.0016212652749890576
ENSMUSG00000015396	Cd83	0.5467731951099618	0.12855782232282373	4.253130499806931	1.7040982071716564e-5	0.3670457128427031	5.318077027738643e-4	0.08250784977232728	0.10554748990649361	0.781713045430284	0.43713032016058107	1	0.5179501972359066
ENSMUSG00000061728	Btnl7-ps	1.3873251108735076	0.3317762840376678	4.181507773822674	1.711742136684284e-5	0.3686750213990611	5.334450179742578e-4	-0.5359164336075617	0.27340391029728944	-1.960163748297622	0.048219433727318614	1	0.07523002523254567
ENSMUSG00000030047	Arhgap25	0.4690348305094669	0.11039501201374846	4.248695860018149	1.724611665742963e-5	0.371429614451062	5.364680883044199e-4	-0.14107249951757664	0.09068653110882294	-1.5556058633259557	0.12172435304011571	1	0.17228475157404838
ENSMUSG00000032446	Eomes	0.9054689843628838	0.20777299703905186	4.357972389418327	1.726264667772076e-5	0.3717683588513943	5.364680883044199e-4	-0.6352038051313846	0.17131227325702886	-3.7078709718500718	2.901769606647002e-4	1	6.500933902285788e-4
ENSMUSG00000037944	Ccr7	0.8906277590015144	0.203127594258754	4.3845729687862525	1.72934988892955e-5	0.3724154985809786	5.366024343894554e-4	-0.015037345129232766	0.1669604708917615	-0.0900653013789192	0.9295150106645436	1	0.9478752750823446
ENSMUSG00000017466	Timp2	0.19203661587762283	0.045017386320362	4.265832194499527	1.7315201469220663e-5	0.37286554843819775	5.366024343894554e-4	-0.3631253993447187	0.036876207077515356	-9.847146117316612	8.50315400833085e-23	1.6668732802530964e-18	7.142456770078134e-22
ENSMUSG00000013707	Tnfaip8l2	0.5147726414876374	0.11955249308130815	4.305829416184055	1.749180340297836e-5	0.376651002676333	5.408660151439013e-4	-0.37518723839192103	0.09846612228449311	-3.810318002651834	1.418959542359634e-4	1	3.3061014426224306e-4
ENSMUSG00000076677	Ighv6-3	1.5551389620331848	0.3423794154457851	4.542150876706071	1.7501394584675248e-5	0.37684002819722745	5.408660151439013e-4	0.6775606645361588	0.28090526535328114	2.412061104244604	0.02069890134017266	1	0.03489440516101082
ENSMUSG00000057135	Scimp	0.5833730461269087	0.13778719476693155	4.233869824505028	1.790820226923439e-5	0.38558150305888567	5.526704697541392e-4	-0.19542698748301615	0.11337845669250965	-1.7236694975750806	0.08592954857719015	1	0.12662373413185815
ENSMUSG00000044258	Ctla2a	0.26205465911846465	0.061617824031789	4.2529034940161	1.8115801600959674e-5	0.3900332084686618	5.583029105581076e-4	-0.2591272893382367	0.050364344634716104	-5.145054327970357	2.5444302066057595e-7	0.0038326752202102556	7.875381350283036e-7
ENSMUSG00000053318	Slamf8	0.7156277576137917	0.1674871113773836	4.272733297079393	1.818122979594572e-5	0.3914236962769154	5.594846362488831e-4	-0.3387492747232015	0.13783773405255206	-2.457594627854589	0.015419718646463444	1	0.026634385934052016
ENSMUSG00000094993	Igkv4-51	2.580170009254473	0.583128763981959	4.424700286838018	1.8204434706044284e-5	0.39190507035172134	5.594846362488831e-4	0.03544946010027937	0.4796152625903069	0.07391228525302525	0.9493857618252122	1	0.9629750005184299
ENSMUSG00000079845	Xlr4a	0.9888474521890178	0.23157913777945133	4.270019578062187	1.830683745262084e-5	0.39409128984256886	5.618557795286432e-4	0.44823371200566925	0.1909913071300968	2.3468801734539033	0.020633453912594652	1	0.03479198113133856
ENSMUSG00000044345	Marveld1	0.1752194002656543	0.041144565493617065	4.258628039050184	1.8457700059119818e-5	0.3973204514726132	5.657056253656681e-4	-0.22690835066400694	0.033753660541953355	-6.7224812663496545	1.785049797865686e-11	3.0490435597343785e-7	7.681133833360932e-11
ENSMUSG00000026109	Tmeff2	0.562648563849568	0.13263585458794902	4.242054801829497	1.854785999854467e-5	0.39924268646867406	5.67686977754632e-4	-0.4161020500172676	0.10898942572510106	-3.817820373389088	1.304768363440949e-4	1	3.0550774339602817e-4
ENSMUSG00000034987	Hrh2	0.7678554248500823	0.1803402294049604	4.257815504525259	1.8580432826982898e-5	0.3999252361679799	5.679027621335116e-4	-0.18105478022525448	0.14842177927662387	-1.2198666604569552	0.22482754782827846	1	0.29408252111733724
ENSMUSG00000004933	Matk	0.4094026668464108	0.09665267052108728	4.235813295578719	1.8794522614690784e-5	0.4045145102359898	5.736583301776195e-4	-0.07088169930184482	0.07913992290456416	-0.8956503456204015	0.3719891765283749	1	0.4523269668797677
ENSMUSG00000026247	Ecel1	1.9306434169678641	0.4362218512212892	4.425829223278583	1.9007615038991087e-5	0.4090818908691662	5.772763415002034e-4	-0.7035277354039208	0.3575869241072851	-1.9674313795457596	0.05972856843430072	1	0.091153660921236307
ENSMUSG00000005481	Ddx39	0.12447512205430022	0.029105844815371498	4.276636628961957	1.900847182138457e-5	0.4090818908691662	5.772763415002034e-4	0.1184314154196588	0.02396739440164692	4.941355469642573	7.704180854663153e-7	0.011369830105311882	2.2872441259560785e-6
ENSMUSG00000090246	Gm17017	0.7311670761149344	0.1688822783669331	4.329448200161751	1.9013410574976983e-5	0.40916859557350466	5.772763415002034e-4	-0.306317507567134	0.13914588357491126	-2.2014126447529683	0.028398026705460943	1	0.04659571508172048
ENSMUSG00000027569	Mrgbp	0.09184590226560051	0.021514867925325476	4.268950317723648	1.901683332522804e-5	0.40922323632558216	5.772763415002034e-4	-0.12413207907245317	0.017704527103736174	-7.011318537068277	2.2594798472172985e-12	3.9262981305095e-8	1.0312961247268126e-11
ENSMUSG00000016918	Sulf1	0.3326328002956704	0.07844004343634549	4.240599389336183	1.907820602945881e-5	0.41052483734189466	5.783503574407193e-4	-0.44616060580543804	0.0643782122058986	-6.930304376556747	5.858674935568399e-12	1.0103870793881261e-7	2.6041025967105966e-11
ENSMUSG00000070942	Il1rl2	0.37733426915671725	0.08867382710080654	4.255306007349323	1.9124394837941468e-5	0.41149960372798655	5.786284342828122e-4	-0.1858058007346757	0.07266452232702747	-2.557036016812368	0.010708049855787294	1	0.019027696641201332
ENSMUSG00000094940	Ighv1-84	2.3542715644177212	0.52294729641151	4.50192893351366	1.9139388235681533e-5	0.41180307727892385	5.786284342828122e-4	-0.215738033633065	0.4283153245446221	-0.5036897380742428	0.6709014299143221	1	0.7340788609866041
ENSMUSG00000068854	Hist2h2be	-0.24812762105240668	0.05869946584754493	-4.227084820445338	1.931926855443195e-5	0.4156540629486034	5.825104061166306e-4	-0.48495277022685596	0.047437903657619906	-10.22289630939369	1.641524360812794e-24	3.253665435567039e-20	1.50249109635728e-23
ENSMUSG00000021711	Trappc13	-0.08925240961753177	0.02084359275430997	-4.282006977855411	1.932015099159918e-5	0.4156540629486034	5.825104061166306e-4	0.18125776504160884	0.017165931061482172	10.559157227907354	4.76254191096265e-26	9.53127512640955e-22	4.7329754381790945e-25
ENSMUSG00000058290	Espl1	0.6125442989452905	0.14335703510284148	4.272858311458963	1.9637444597599234e-5	0.4224603456281523	5.912737141494634e-4	-0.16134929237216664	0.11806984398367516	-1.366558021322324	0.1745021480472017	1	0.23622603249974358
ENSMUSG00000026094	Stk17b	0.30785001695769226	0.07218981909952868	4.264451979485598	1.9663949866100534e-5	0.4230108895195547	5.912737141494634e-4	-0.2588175496962897	0.059410760061413645	-4.356408661137254	1.4381985243450016e-5	0.19743589342208182	3.7542650592680234e-5
ENSMUSG00000019122	Ccl9	0.7589186497146425	0.17650157080250115	4.299784111065192	2.009053222166297e-5	0.43216743862019213	6.028153158649704e-4	0.16126795456965576	0.14526332130542788	1.1101766992548439	0.26702068738520096	1	0.34106478685147384
ENSMUSG00000025422	Agap2	0.5427304946211152	0.12730520067681772	4.263223275527553	2.0118946799453044e-5	0.43275854565623495	6.028153158649704e-4	0.09305717402702136	0.1048382823136671	0.8876258936463908	0.37662140009806816	1	0.4572349832814336
ENSMUSG00000053137	Mapk11	0.2609811660517994	0.06145325072854521	4.246824422757068	2.0129062949425776e-5	0.432956014979199	6.028153158649704e-4	-0.1386096482770284	0.05053798267812343	-2.7426826503905724	0.0062254593351802195	1	0.011527227732969549
ENSMUSG00000023828	Slc22a3	0.6497938706295876	0.14947483109606818	4.347179159626961	2.0215395431128487e-5	0.4347927249327115	6.045870480349999e-4	-0.6311754020099477	0.12254535272134924	-5.1505453939583585	3.7076824007862324e-7	0.0055507713222170685	1.1330811852752982e-6
ENSMUSG00000029468	P2rx7	0.33712733578119114	0.07952610751198778	4.239203279632069	2.0311539944397013e-5	0.43684028958414656	6.059692423829048e-4	-0.29206824720205093	0.06542192646362013	-4.464378580543091	8.8983163052288e-6	0.12373998654051169	2.3723512593774985e-5
ENSMUSG00000025909	Sntg1	0.789714695705511	0.17864373248796894	4.42061238145422	2.031607814559557e-5	0.4369175765991783	6.059692423829048e-4	-0.6988083660482952	0.1448723375402744	-4.823614900629508	1.2731929706167548e-6	0.01857333905535722	3.696479226147366e-6
ENSMUSG00000031511	Arhgef7	-0.10878083701705833	0.025562827292877722	-4.255430581709039	2.0379929511872717e-5	0.43827038415282277	6.070599887130922e-4	-0.08806521480172416	0.020989964898656274	-4.195586568482631	2.8098590707103292e-5	0.3781789323269032	7.110448559351249e-5
ENSMUSG00000006360	Crip1	0.3151301257905496	0.07391827710675387	4.263223361326915	2.0771685049053855e-5	0.44667431529485413	6.179020909445151e-4	-0.2378279514598119	0.06076292515120712	-3.914030650565005	9.318501945942392e-5	1	2.2214054724572978e-4
ENSMUSG00000074203	G430095P16Rik	0.6855408409610175	0.1621239010844735	4.22849953878066	2.0908626277226504e-5	0.4495981908392015	6.211453181502896e-4	-0.3675840063319568	0.13291949338485756	-2.7654634920075063	0.005433044244027263	1	0.010161441327549016
ENSMUSG00000030427	Lilra6	0.9435485806970872	0.22331345329042498	4.225220499680231	2.093750287990862e-5	0.45019818692379515	6.21173835441129e-4	0.1650016097144373	0.18444975622636242	0.8945612783133324	0.3787185563629901	1	0.4591797404987409
ENSMUSG00000094707	A830019P07Rik	0.7952628331646493	0.1866137605753193	4.261544436556557	2.1023977959769893e-5	0.45203655011301247	6.229088329997868e-4	-0.33171467569381435	0.15366874182906115	-2.15863468227526	0.032416032972231924	1	0.052619119643919354
ENSMUSG00000024610	Cd74	0.6645029730559354	0.1534679105692209	4.329914772353761	2.111996152671027e-5	0.45407917282427085	6.249205637378062e-4	-0.14144574427884335	0.126136086683109	-1.1213741285172159	0.27658366520798927	1	0.3512707268574754
ENSMUSG00000021047	Nova1	0.3410800588027418	0.07969237050681544	4.279958754314781	2.1211965932694376e-5	0.4560360555869964	6.268093678198971e-4	0.020443250579748107	0.06571694651556861	0.3110803478202539	0.7558616512549979	1	0.8076971426823685
ENSMUSG00000025991	Cps1	-2.0821266022910883	0.4353808838829329	-4.7823105684422735	2.1404533728481706e-5	0.46015466609489974	6.31660848796348e-4	-0.7653051667407826	0.35459483547189596	-2.158252433999249	0.05424678913726048	1	0.0835903950895556
ENSMUSG00000037405	Icam1	0.3191204856482926	0.07557700411437793	4.222454824556646	2.169645366969799e-5	0.4664086645374977	6.394275372244371e-4	0.11770534415137397	0.06190348932950856	1.9014331086384402	0.05785644006636129	1	0.08857600439772981
ENSMUSG00000021624	Cd180	0.6736793106728365	0.15768006522604397	4.2724443936973024	2.1741074485934318e-5	0.46734613714964407	6.398950375483129e-4	-0.0034691637733971375	0.12973480907799106	-0.026740423777180906	0.9788915513302173	1	0.9844662557581318
ENSMUSG00000094787	Ighv1-54	2.2179456487808196	0.448616958738944	4.943963008031247	2.242401029805151e-5	0.4820041013566172	6.591237161716568e-4	-0.25378550591383836	0.36205252851247666	-0.7009632192227396	0.510138909951497	1	0.588505852619803
ENSMUSG00000022378	Fam49b	0.2181332867477724	0.05152987585381458	4.233142097345549	2.24898216181e-5	0.48339622585944136	6.601860433038827e-4	-0.21077587714147128	0.04242991289914435	-4.967624553990584	6.853143634959856e-7	0.010136484750469122	2.0438185098712203e-6
ENSMUSG00000024259	Slc25a46	-0.0785587515257916	0.018480744618795196	-4.250843412764666	2.2718370674519333e-5	0.48828594090744404	6.660164240826479e-4	0.15333858647713103	0.015124441653361673	10.138462628340983	3.625357757468369e-24	7.172045251599675e-20	3.265961971407344e-23
ENSMUSG00000022403	St13	-0.10786346473611547	0.025426180207746753	-4.242220571663062	2.3035423600472393e-5	0.4950773240213527	6.7442264543962e-4	0.16044818016968868	0.02088429918641588	7.682717946985343	1.8492311822092588e-14	3.328616127976666e-10	9.677150290531096e-14
ENSMUSG00000002475	Abhd3	-0.19944380094752812	0.04696436551158868	-4.246704895828187	2.3218817753069724e-5	0.4989956123312214	6.788987041045394e-4	0.4851478942121341	0.03855672899813711	12.582703637426667	4.036013690048661e-36	8.408227320478376e-32	6.328776646742266e-35
ENSMUSG00000034066	Farp2	-0.1735095999042343	0.04091069715970369	-4.241179250182473	2.3367497255890718e-5	0.5021675160290915	6.823493194761474e-4	-0.2778714559202193	0.03364110893401025	-8.25987801012406	1.774525095698318e-16	3.2839361420993072e-12	1.0540565377571616e-15
ENSMUSG00000030609	Aen	0.18413632036301916	0.04357606098482305	4.225630224520554	2.3543454974664576e-5	0.5059253039505671	6.857090014690593e-4	0.4451944965159883	0.03586588472710032	12.412756576435395	2.496543244392712e-35	5.191561676714645e-31	3.8126687529843675e-34
ENSMUSG00000046841	Ckap4	0.26422837208273925	0.06311363523823138	4.186549722344019	2.3583883220694244e-5	0.5067704826462779	6.857090014690593e-4	-0.2388798110571689	0.05170797627193398	-4.619786506454864	3.876166919274902e-6	0.055037694086784335	1.0710119225231075e-5
ENSMUSG00000022346	Myc	0.36625184146158724	0.08753562230741746	4.1840319610151715	2.3585671644334406e-5	0.5067853266218134	6.857090014690593e-4	-0.20157346112022753	0.07166042921688658	-2.812897764122341	0.004950314436128295	1	0.009327584598043077
ENSMUSG00000031320	Rps4x	0.12399591886330671	0.029324324253337974	4.228432266403967	2.3605819744069905e-5	0.507194643021086	6.857090014690593e-4	-0.1688810752704732	0.024122094700051756	-7.001094945129738	2.4695994258598227e-12	4.287224603292652e-8	1.1232840724613024e-11
ENSMUSG00000018654	Ikzf1	0.6540690904312065	0.15517266124254414	4.215105194392828	2.3826411787500906e-5	0.5119104572544569	6.912144572147101e-4	0.4253238869846998	0.1276320735630652	3.3324216641715845	9.686255681593375e-4	1	0.002024125424221771
ENSMUSG00000027070	Lrp2	-0.21764008677346408	0.051423715748961936	-4.232290172027436	2.3916601854097643e-5	0.5138242742334338	6.929274841868837e-4	-0.3238318046701689	0.042320170459048845	-7.651949440598901	2.162347826958436e-14	3.88725268852318e-10	1.1254830759684716e-13
ENSMUSG00000026069	Il1rl1	0.8215853679668278	0.19371132156149895	4.241287299802934	2.411943722986535e-5	0.5181578700091973	6.978954457759869e-4	-0.09090934330646114	0.15839890260424236	-0.5739265980497161	0.5890592979906066	1	0.6621449072790597
ENSMUSG00000002109	Ddb2	0.2016009167308295	0.047942480534245	4.205058113061699	2.432210262337625e-5	0.5224874085553686	7.023055944788383e-4	-0.2410876105102629	0.03945665080563328	-6.110189425298168	9.288278192782198e-10	1.5217914991054353e-5	3.521732480117053e-9
ENSMUSG00000038844	Kif16b	-0.13333644031676753	0.031373102152708464	-4.250024102422287	2.433497880289355e-5	0.5227396796649563	7.023055944788383e-4	0.07282854343893577	0.025731637275989715	2.8303112879215173	0.004636899484307131	1	0.008780906419175998
ENSMUSG00000084806	Gm15232	1.1092972262763903	0.2695391189404677	4.115533324576153	2.438879887884329e-5	0.5238713999175538	7.029471034367125e-4	0.1906004719306881	0.2215116800819978	0.8604533713984419	0.3924427249887604	1	0.4729590572347348
ENSMUSG00000076547	Igkv4-70	1.930361647346645	0.3985218595321866	4.84380367393809	2.4647645708862118e-5	0.5294067821806494	7.094886994409974e-4	-0.17389072742317505	0.32466257229220963	-0.5356044775825476	0.6310355204598517	1	0.6997493952831735
ENSMUSG00000034118	Tpst1	0.2462675727956698	0.058882992137734784	4.182320970028472	2.4816836493097724e-5	0.5330160141987529	7.134359545321931e-4	-0.26805967373016426	0.04832878165709944	-5.546584551460271	2.8622050396353966e-8	4.4719091539263434e-4	9.60876951371865e-8
ENSMUSG00000028655	Mfsd2a	-0.5920406213826169	0.14013606849258425	-4.224755466248482	2.493209044759915e-5	0.5354665065430869	7.15136035072251e-4	-0.11411704517467776	0.11522978004174676	-0.9903433394851064	0.32084248616761846	1	0.39934524474321426
ENSMUSG00000023393	Slc17a9	0.42301563582448387	0.10150737191134517	4.167339059806795	2.4940252717453902e-5	0.53561686736004	7.15136035072251e-4	-0.1206044875177405	0.08298186647904152	-1.4533836443435653	0.14553300463805008	1	0.2016599132022202
ENSMUSG00000021518	Ptdss1	-0.06633872034354575	0.015726946123709062	-4.21815652077152	2.5009590761462045e-5	0.5370809616023974	7.162012921921389e-4	0.04753066373695335	0.012863690369937673	3.6949477459463793	2.1970688509521567e-4	1	5.007372631623112e-4
ENSMUSG00000039621	Prex1	0.3419007691498196	0.08136278383286279	4.202176388803998	2.506174395190157e-5	0.5381758896231343	7.167723196320846e-4	-0.08996120441680966	0.06695970082160578	-1.3435126398859598	0.1804357028307418	1	0.2432520341524893
ENSMUSG00000027552	E2f5	-0.12087394999594572	0.028682348221474776	-4.214227826208669	2.520401669901225e-5	0.5412058505778901	7.196580257409785e-4	0.31234901018042177	0.023627030551167175	13.219985876091895	9.850759112367898e-40	2.072796732424453e-35	1.8114813306553564e-38
ENSMUSG00000046410	Kcnk6	0.37875719040636907	0.09067047261011325	4.177293660252997	2.5227327314635896e-5	0.541681172099862	7.196580257409785e-4	-0.3302931160890153	0.07462800280475294	-4.425860316175839	1.0020367443138755e-5	0.1389223742316757	2.6581210774592328e-5
ENSMUSG00000043289	Mei4	0.5186946053998294	0.12284058814970611	4.222501806713064	2.542672463546396e-5	0.5459372046480466	7.244174774183208e-4	-0.4751418958777207	0.10138585672177233	-4.686471182875405	2.8388327692801714e-6	0.040663440587169176	7.967566592993579e-6
ENSMUSG00000051590	Map3k19	1.1050983662927674	0.2598015257647947	4.25362538976481	2.5722626676004603e-5	0.5522647947338188	7.31910698424269e-4	0.1728107039370154	0.21246654071351756	0.8133549092326368	0.41582074344602865	1	0.4966412969628332
ENSMUSG00000002602	Axl	0.2869395415681639	0.068901765789375	4.164472975123831	2.5844747334860122e-5	0.5548608805321119	7.344463256040518e-4	-0.17755522474423904	0.05648531590486761	-3.1433873016356495	0.00168219996292167	1	0.003397533936186809
ENSMUSG00000028172	Tacr3	0.9576413376085694	0.22307757610161716	4.292862394973939	2.6207719203247285e-5	0.5626273158553127	7.438111734584889e-4	-0.7480150156790384	0.18350723226847457	-4.076215451741314	5.0834827333470234e-5	0.6700030242551377	1.2468317272895129e-4
ENSMUSG00000020676	Ccl11	0.8551073225698279	0.2028695575297761	4.215059829488315	2.6372047601166963e-5	0.5661287458542512	7.475215683739695e-4	-0.10066999509254844	0.1671241787381534	-0.6023664310732443	0.5588355068819698	1	0.6335803965979165
ENSMUSG00000020859	Spag9	-0.11940845907398243	0.028263165069677347	-4.224879229895309	2.6592139963146168e-5	0.5708268764488956	7.524100783511825e-4	0.31916535469562274	0.023156264519501042	13.78311058879284	6.144348977209007e-43	1.3019875482705887e-38	1.28736260915139e-41
ENSMUSG00000000486	Sept1	0.3262697171386718	0.07738111404235883	4.21639984350794	2.6612140203243928e-5	0.5712295894626309	7.524100783511825e-4	-0.2602445675516769	0.06370514606574888	-4.085141995955608	4.470714214692404e-5	0.5920119763095681	1.1040828189913503e-4
ENSMUSG00000035458	Tnni3	0.7069346115147426	0.17002432314639188	4.157843998038257	2.684576151865234e-5	0.5762174252363539	7.580520806491539e-4	-0.24054894463689008	0.1400166922292328	-1.718001909679938	0.08660171462772336	1	0.12746923270269414
ENSMUSG00000043903	Zfp469	1.1415020517114545	0.27827359089987724	4.102085462080972	2.6959979744719562e-5	0.578642045260916	7.603124325725665e-4	0.026781426301366377	0.22742404848684958	0.11775986963364153	0.9072205788410468	1	0.9304133184524345
ENSMUSG00000058427	Cxcl2	1.3102480972828536	0.3059182163370176	4.283001231412146	2.761921488128706e-5	0.5927635897821829	7.779179118019221e-4	-0.07007284394163613	0.25169738121010876	-0.27840116414696264	0.78753726989956	1	0.8330239490651792
ENSMUSG00000028437	Ubap1	-0.07564291491092602	0.018018534688144863	-4.19806139733963	2.7672155267100875e-5	0.5938721241872519	7.783272514485166e-4	0.19709459634789459	0.014785534545310817	13.330231365250334	1.6364185266175701e-40	3.4484247611412056e-36	3.0883756264433885e-39
ENSMUSG00000032560	Dnajc13	-0.13515506676025588	0.031947094232927076	-4.230590293277906	2.7703706941136363e-5	0.5945215509567864	7.783272514485166e-4	0.45630414724025514	0.025957782982027843	17.578702601689148	1.7633664763236273e-68	3.8483709979286845e-64	9.167445669317064e-67
ENSMUSG00000048388	Fam171b	0.5915493824528207	0.1392051188110375	4.249480101775662	2.7759780995456887e-5	0.5956971403815093	7.789191512357014e-4	0.961354512313401	0.11477148474932877	8.37624880790804	1.12601568760616e-16	2.0879708895281024e-12	6.755183355331536e-16
ENSMUSG00000029811	Aoc1	0.682496041990957	0.1634325103234554	4.176011496367543	2.8030003149017564e-5	0.6014678075716189	7.848085178711633e-4	-0.4143377236736381	0.1333787168155363	-3.1064755574659637	0.0024056552546913136	1	0.004755106606745707
ENSMUSG00000029299	Abcg3	0.7580217222327518	0.17716152830849616	4.2787039007294405	2.804021265145723e-5	0.6016588428623177	7.848085178711633e-4	0.553699561346271	0.1455526652599775	3.804118326224297	1.732640804292911e-4	1	3.9914059981697444e-4
ENSMUSG00000024300	Myo1f	0.6113449235644983	0.1463081591096139	4.178474579168749	2.820718962581563e-5	0.6052134606115002	7.884868899793032e-4	-0.13892436165820202	0.12030630025731366	-1.1547554979337544	0.25280875413973114	1	0.3251964150978817
ENSMUSG00000038023	Atp6v0a2	-0.1202137346530805	0.028643375606947692	-4.1969122739821785	2.82460449544832e-5	0.606018894498437	7.884868899793032e-4	0.14124710259400272	0.023562290463720013	5.994625302301898	2.052850456906278e-9	3.325823025233861e-5	7.548830857151147e-9
ENSMUSG00000104422	Ighv1-14	2.213760242631668	0.45302040908419683	4.886667792974038	2.829183428724007e-5	0.6069730127984484	7.884868899793032e-4	0.6061850064036532	0.3706606512473621	1.6354177449472858	0.14892233725176526	1	0.20573935962320586
ENSMUSG00000027636	Sla2	0.5919379439183714	0.14298209351014435	4.139944585972748	2.8313380301715122e-5	0.6074069476126945	7.884868899793032e-4	0.02039434795905035	0.11780141980602767	0.17312480607306577	0.8629725961853575	1	0.8956064726310354
ENSMUSG00000040528	Milr1	0.516823544531919	0.12434151904092003	4.156484081249125	2.848979621411273e-5	0.6111631083851463	7.924080694502779e-4	-0.00265400968846531	0.10242158785273643	-0.02591260049864968	0.9791595414124102	1	0.9846467644040104
ENSMUSG00000093938	Evi2b	0.6169891499307067	0.147849083705037	4.1731009382622695	2.880566940143271e-5	0.617910414330133	8.00193445507215e-4	0.12343366334957954	0.12172310508468295	1.0140528641929283	0.3127284793890188	1	0.39064889732911223
ENSMUSG00000070527	Mkrn3	0.22741843401483539	0.05458471012678124	4.166339502154022	3.031087044884901e-5	0.6501681711278112	8.409565814929417e-4	-0.1312187449229749	0.04508681636689544	-2.910357295027843	0.00360364041445549	1	0.006938184897642044
ENSMUSG00000076655	Ighv4-1	1.6866106607486582	0.37769915550516137	4.465486978632152	3.0425906840486307e-5	0.6526052758215908	8.430712768978974e-4	0.23770036962137506	0.3105736436782541	0.765359116782061	0.4839816475248153	1	0.563332337476366
ENSMUSG00000091971	Hspa1a	-0.5422053693457666	0.1293316622320221	-4.192363725852727	3.046286938231583e-5	0.6533676225119099	8.430712768978974e-4	-0.8309969622208011	0.10488645843161269	-7.922824115208559	2.4651260233014092e-14	4.426626800042341e-10	1.2771017262975474e-13
ENSMUSG00000037905	Bri3bp	-0.1522886216577632	0.036749439170673935	-4.143971312065343	3.0538837937995105e-5	0.654966457256181	8.431541549021116e-4	-0.06327497462326825	0.029752237688207925	-2.12672993831139	0.03329266350370811	1	0.05391129143592236
ENSMUSG00000043008	Klhl6	0.369941046151045	0.08780846839831541	4.213045198248126	3.0582346214202265e-5	0.6558689969097817	8.431541549021116e-4	0.18784039517470807	0.07214933947569017	2.6034943152597894	0.009438467552242378	1	0.016921709894846922
ENSMUSG00000042759	Apobr	0.48310234445536643	0.11645466819977643	4.148415447173065	3.0662779788129656e-5	0.6575633125564405	8.431541549021116e-4	-0.12682694177011983	0.09574048895750126	-1.324694945170143	0.18764144154106058	1	0.25165131259258455
ENSMUSG00000050541	Adra1b	0.38092714071403483	0.09189671678704697	4.145165943161609	3.068012491428332e-5	0.6579045986618915	8.431541549021116e-4	-0.8213079363487514	0.07566373855638198	-10.854709957752634	2.5799302861949658e-27	5.1988175197114757e-23	2.7323193145228073e-26
ENSMUSG00000022536	Glyr1	-0.05834889829444632	0.013966583439349362	-4.177750310076157	3.069031416959646e-5	0.6580924067386569	8.431541549021116e-4	0.08674700000548208	0.011413889320530092	7.600126264537258	2.9764501168143065e-14	5.33647741443637e-10	1.532014609050084e-13
ENSMUSG00000102692	Dchs2	0.95574951020675	0.2301825620428259	4.152136902659599	3.073611328315386e-5	0.659043741017385	8.431541549021116e-4	-0.15505810322943012	0.18885870604378519	-0.8210270337946788	0.4192313214352119	1	0.5002023392982241
ENSMUSG00000005057	Sh2b2	0.39755582354469027	0.09665403741533816	4.113183827348339	3.073756311786844e-5	0.6590440908102172	8.431541549021116e-4	-0.13704987649554448	0.07919429565153786	-1.7305523758753592	0.0842531024918034	1	0.1243922621952835
ENSMUSG00000036718	Micall2	0.2853338293438693	0.06951958199480635	4.104366297328801	3.0805938776846225e-5	0.660479327375583	8.431541549021116e-4	0.05547121355635854	0.056199621821723715	0.9870389116198001	0.3242625141951981	1	0.4032170114763246
ENSMUSG00000024672	Ms4a7	0.953642670899461	0.2240494065309122	4.2563945411204935	3.080689982182449e-5	0.660479327375583	8.431541549021116e-4	-0.24972073707039547	0.18431224041650376	-1.3548787454706392	0.18506014577990682	1	0.24872465330649482
ENSMUSG00000049037	Clec4a1	0.8299817186503649	0.1971623240516446	4.209636514697198	3.1045615390061844e-5	0.6655559027321458	8.486437199561009e-4	-0.1090546229089736	0.16223354310843338	-0.6722076139093125	0.5084841732770281	1	0.5869620948115352
ENSMUSG00000025197	Cyp2c23	1.1927899602666756	0.26743687348852135	4.460080409659258	3.150856330961951e-5	0.6754490716683134	8.602417695734277e-4	-1.6714475590127331	0.21925306646213327	-7.623371412693127	2.0937034454687429e-13	3.7031332840005655e-9	1.020525637790252e-12
ENSMUSG00000059263	Usp47	-0.0680801571192485	0.016309665233299176	-4.174221613099107	3.1685634427469224e-5	0.6792132595872303	8.640159946637472e-4	0.14186626438437933	0.01338735693483194	10.597033086886935	3.1742470918552945e-26	6.358969199113711e-22	3.1829730527657572e-25
ENSMUSG00000024669	Cd5	0.9940277382484739	0.2388687729737322	4.161396761383225	3.19368199045969e-5	0.6845657346550346	8.697994855534708e-4	-0.29068525980301074	0.19658484067139884	-1.4786758674281775	0.15544110005963865	1	0.21367269521387652
ENSMUSG00000096498	Ighv2-5	2.3253882820531104	0.4759163519211184	4.8861281455581	3.231386050854788e-5	0.6926152861402153	8.785679590110942e-4	-0.7406454683370517	0.38308065868544594	-1.9333930114837992	0.08190743021175809	1	0.1212508967894238
ENSMUSG00000085148	Mir22hg	0.2097896597531634	0.05021118729481022	4.178145769017636	3.23684616796735e-5	0.6937532391804422	8.785679590110942e-4	0.6368465845083721	0.041264441108106203	15.433302073325951	1.8593042865487993e-53	4.006614807084007e-49	5.884975772403604e-52
ENSMUSG00000012017	Scarf2	0.251403384967431	0.06127877650509267	4.102617566891821	3.237722917572681e-5	0.693908775694177	8.785679590110942e-4	-0.26768987754491075	0.05005121981750002	-5.3483187526893214	9.070881806862879e-8	0.0013900219280836676	2.913339940596217e-7
ENSMUSG00000042804	Gpr153	0.38200443219648333	0.09266912621877349	4.122240575514291	3.2601168745049314e-5	0.6986756473751519	8.828488918759325e-4	-0.32710405150817945	0.07623423450756552	-4.2907763634160645	1.8466193658590316e-5	0.25143569285536577	4.7578887806541585e-5
ENSMUSG00000021423	Ly86	0.5750660148183067	0.13891922269409496	4.139571210275358	3.261434493380147e-5	0.6989254119313655	8.828488918759325e-4	-0.02531494218558799	0.11429040072675474	-0.22149666135225918	0.8254646550912552	1	0.8651515913856747
ENSMUSG00000041642	Kif21b	0.5323706538871996	0.12898343135547458	4.127434417681148	3.304123876513966e-5	0.7080407054981779	8.93317866054827e-4	-0.07634693046412003	0.10561414552276524	-0.722885462796869	0.472900673945846	1	0.5529143448042152
ENSMUSG00000028884	Rpa2	0.15398126120049874	0.0370835080582027	4.152284108580682	3.316248991417615e-5	0.7106058338809665	8.953108534311323e-4	0.053286745448359346	0.030553166686006855	1.7440662042001793	0.08080321484252535	1	0.11971982510727339
ENSMUSG00000058325	Dock1	-0.1133100775272268	0.027333584148933356	-4.145452601818723	3.319542735520579e-5	0.7112784219399945	8.953108534311323e-4	-0.2119642270954922	0.022432337962055713	-9.449047506953113	2.942078471189248e-21	5.704984363483071e-17	2.288157569466339e-20
ENSMUSG00000024909	Efemp2	0.23449650057223118	0.056952278256000834	4.117420896108282	3.328593620662566e-5	0.7131844691631615	8.966650926557235e-4	-0.4300688075499812	0.04665141488038243	-9.21877307800221	3.41409210579215e-20	6.562909254964249e-16	2.5079882286556994e-19
ENSMUSG00000018395	Kif3a	-0.10767233562466341	0.025961207062322987	-4.147431795685889	3.347980169125919e-5	0.7173047512352282	9.007969376447501e-4	-0.0627386105734132	0.021379788352883154	-2.9344823034673606	0.0033826009826936915	1	0.006539773608994468
ENSMUSG00000073590	3222401L13Rik	0.3648145873121551	0.08871641062672983	4.112143229589117	3.396304040983889e-5	0.7276241777403885	9.12695183767301e-4	-0.2987972769270495	0.07280581284522195	-4.104030505946872	4.5937585422296934e-5	0.6076164423807215	1.1325841697856277e-4
ENSMUSG00000023224	Serping1	0.3282820954404648	0.08000291448818193	4.103376702469493	3.4075104214048796e-5	0.7299909575775674	9.146021035787693e-4	-0.1785443766818527	0.06565724300862784	-2.719340144367479	0.00665565259171358	1	0.012266621868484956
ENSMUSG00000022240	Ctnnd2	0.7943374479193732	0.19326382084724197	4.110119754629228	3.4297181585025215e-5	0.7347142239144101	9.194537198173446e-4	-0.20994137620807304	0.15849023006455312	-1.3246329197866888	0.19006996818298394	1	0.25437548791288195
ENSMUSG00000095519	Ighv1-66	1.6359086054450271	0.3727981085893847	4.388189123692375	3.449126623103184e-5	0.7388374139349331	9.235441214280259e-4	-0.6008847600092243	0.30600458171690254	-1.9636462847642182	0.05102145499225309	1	0.07916312635329639
ENSMUSG00000096446	Gm8104	1.203670210115209	0.29119214433684265	4.133594375825051	3.4773379426899554e-5	0.7448457873241885	9.29978925033584e-4	-0.34323534509474546	0.23918140006143299	-1.435041959812036	0.16196665506770722	1	0.22139820874256994
ENSMUSG00000105128	Gm42870	1.5909553967566232	0.36382070858672294	4.372910500165747	3.500317007186144e-5	0.7497328997692001	9.350006449807789e-4	0.47474219882080576	0.29784706882208695	1.5939126099118457	0.11410044964422121	1	0.16262164392989792
ENSMUSG00000006724	Cyp27b1	0.7670904521549503	0.1821379251389295	4.2115910322896015	3.561143227630596e-5	0.762725656493921	9.501078891847529e-4	0.3286424756656155	0.14949214412531675	2.198392949599546	0.03084764299767239	1	0.050292416789361694
ENSMUSG00000014355	Anapc1	-0.08009376626776736	0.019359380571868774	-4.137207074907762	3.575979472564601e-5	0.7658675236391606	9.524342145549525e-4	0.07781067364006947	0.015938891882512303	4.881811998827918	1.0845455393875354e-6	0.015871239423397195	3.1677898131940207e-6
ENSMUSG00000026196	Bard1	0.4179447192893891	0.10080720457373886	4.145980647481095	3.5784234567792024e-5	0.766355167503834	9.524342145549525e-4	-0.22845237082486688	0.08313029905616037	-2.7481240103627105	0.0059340477323206135	1	0.0110353945751664
ENSMUSG00000020423	Btg2	0.28222357089531236	0.06814413025571706	4.141568317568112	3.6180078580590354e-5	0.7747963828033424	9.618195083592783e-4	-0.33699215542034294	0.055988385585616224	-6.018965396046683	2.212732795105643e-9	3.581086755598973e-5	8.113961342105416e-9
ENSMUSG00000073628	Gm10552	1.4547652312167498	0.3408924956036773	4.267519085864725	3.633084753418931e-5	0.7779887690971298	9.646750459227283e-4	-0.45326868112062757	0.2803473994042575	-1.6168107215684198	0.11379591744557709	1	0.1622707612843845
ENSMUSG00000023349	Clec4n	1.3601008735651643	0.31129062582367195	4.369231710612392	3.645159070605237e-5	0.7805379117886995	9.667274669849479e-4	-0.12350710192743995	0.2561706774916276	-0.48212817773211586	0.6396896596422946	1	0.7073717630802454
ENSMUSG00000039323	Igfbp2	0.6297158746567258	0.15324606941799607	4.109181247181644	3.656952671708965e-5	0.7830267060663236	9.687006416451927e-4	-0.31464292365700336	0.1255376342076367	-2.506363335926742	0.013460657889841455	1	0.023489381123587345
ENSMUSG00000026353	Ubxn4	-0.08280598822373732	0.020085695557429853	-4.122634836666473	3.667051020486249e-5	0.7851522939963107	9.702205975842987e-4	0.18586792393095372	0.01652255407290184	11.249345779765992	2.794049096549689e-29	5.677787169098623e-25	3.219595362368054e-28
ENSMUSG00000042489	Clspn	0.8613376433766157	0.20882130225872766	4.124759466873865	3.685786223187383e-5	0.7891268303844187	9.740193497879151e-4	-0.3594194075122209	0.17148601900154736	-2.0959108480381587	0.039287727901675	1	0.06261666310007667
ENSMUSG00000032094	Cd3d	0.9532352626531977	0.2311314554267486	4.124212608332327	3.699684135425482e-5	0.7920653765532415	9.765322858523417e-4	-0.3049697714368999	0.1902743004379724	-1.6027901336907933	0.11631791584707027	1	0.16545355401861284
ENSMUSG00000025888	Casp1	0.5798983834779233	0.14033636050390372	4.132203381901103	3.7263277042030496e-5	0.7977322349157888	9.823994993628205e-4	-0.17496087925844964	0.11557030811234009	-1.513891259062656	0.13104005489525092	1	0.18387918657212765
ENSMUSG00000028111	Ctsk	0.4394577634347994	0.10803734795893334	4.067646714188542	3.740432916453926e-5	0.800714474425292	9.849511576806665e-4	-0.15329425483080278	0.08855942948675183	-1.730976088251958	0.0848464050704097	1	0.12521006494373832
ENSMUSG00000028136	Snx27	-0.11331718405033424	0.027361640879944988	-4.141461564660448	3.748127499769868e-5	0.802324172600738	9.853870589917966e-4	0.3751084797810359	0.022476958050606555	16.688578540587407	3.5933034577243165e-62	7.806451761906078e-58	1.5171649950251187e-60
ENSMUSG00000040552	C3ar1	0.5985122974102598	0.14604021755813867	4.0982703765967194	3.750945301182202e-5	0.8028898417180503	9.853870589917966e-4	-0.02003224936419082	0.12020489852501577	-0.1666508570781907	0.8687260533675683	1	0.8999079801434713
ENSMUSG00000032422	Snx14	-0.06542278192785178	0.015838752116025583	-4.1305515389471426	3.758275181509663e-5	0.8044212198503282	9.854086367992254e-4	-0.037463092256625495	0.012991208405551888	-2.8837265239017618	0.00391321225705393	1	0.007494008600714951
ENSMUSG00000060176	Kif27	-0.3633488830437642	0.08770910159974679	-4.142658816662799	3.7598846462745154e-5	0.8047281108421345	9.854086367992254e-4	-0.21573928034566428	0.0721585227174912	-2.989796246110914	0.0028313491269446878	1	0.005531684030524738
ENSMUSG00000052595	A1cf	-0.21679426841052904	0.05232760087825733	-4.143019453823448	3.7752184427029265e-5	0.8079722511072803	9.880364564431442e-4	0.09590092317316347	0.043029707327914994	2.2287142797029653	0.02629879397248532	1	0.04342345389446207
ENSMUSG00000071068	Treml2	1.0305447067762938	0.24786909972580634	4.15761669331226	3.778792074212915e-5	0.8086992918023059	9.880364564431442e-4	0.39103096846830937	0.2041578251795447	1.9153366672299768	0.058211246316982	1	0.0890579236660593
ENSMUSG00000073295	Nudt11	-0.46375426303988776	0.11307168183250835	-4.101418281960651	3.787593742746352e-5	0.8105450609477194	9.891754503503413e-4	-0.058229089568290884	0.09301894361831425	-0.625991731396381	0.5333266934495121	1	0.610005770327187
ENSMUSG00000063354	Slc39a4	0.5699154476265959	0.1374184960675557	4.147297954319208	3.802512077428743e-5	0.8136995594489768	9.919073415576433e-4	-0.15495164045619228	0.11314406077598721	-1.3695075056832147	0.17614096908883706	1	0.23816922114704142
ENSMUSG00000025728	Pigq	-0.09547137282055769	0.02315447467784421	-4.123236400258791	3.8184558462211424e-5	0.8170731819744	9.949000121108507e-4	0.2607967083650338	0.01905010920571544	13.690037445391086	1.3477336770006934e-42	2.8539608344166686e-38	2.7870280712771773e-41
ENSMUSG00000032565	Nudt16	0.2069681167499992	0.050123065519308015	4.129199094382457	3.831053888401495e-5	0.8197306005012679	9.970149715885575e-4	0.2786508470437218	0.04122371376985716	6.759479473377086	1.468048581923566e-11	2.511977928529414e-7	6.353929001435764e-11
ENSMUSG00000074607	Tox2	0.800144677686297	0.19211710581275535	4.1648799272780455	3.909323527670385e-5	0.8364388619803556	0.0010161957688574034	-0.4267006912460623	0.15762193146551862	-2.707114976188497	0.008269421430652818	1	0.014992495417050097
ENSMUSG00000067144	Slc22a7	-0.5614440016242424	0.13685301075007758	-4.102533064833753	3.921595821408548e-5	0.8390254259903589	0.0010169344038803857	-0.5281244522677276	0.11249530152803536	-4.694635643392732	2.7604387706621325e-6	0.03957088977744167	7.758307829481256e-6
ENSMUSG00000003452	Bicd1	-0.1551566026487228	0.03762011307525129	-4.124299210328368	3.925422059952677e-5	0.8398047955062757	0.0010169344038803857	-0.13125184107603166	0.030982298317790848	-4.236349406030456	2.2270577746456333e-5	0.3018108696199762	5.6958922463954004e-5
ENSMUSG00000029804	Herc3	0.2695904682758897	0.0650551247356871	4.144031225383252	3.925875928871742e-5	0.8398626374635317	0.0010169344038803857	0.43055091139765045	0.05339536312229169	8.063451322759194	1.0325338281238047e-15	1.8924280001853094e-11	5.854972020790718e-15
ENSMUSG00000004040	Stat3	0.20846633860182306	0.05085468253780901	4.099255529652245	3.933770546443593e-5	0.8415121952952135	0.0010177945166153068	-0.07100764279227013	0.04173723052148306	-1.701302216392172	0.08952613199133422	1	0.13108036078121985
ENSMUSG00000076594	Igkv6-13	1.7338086321066246	0.3637928487221455	4.765922799738314	3.9782088433755645e-5	0.850978653686467	0.0010280966895929117	0.11503335464063147	0.29268726668873357	0.39302480064145356	0.7130902456726824	1	0.770952386009565
ENSMUSG00000029189	Sel1l3	-0.15940658416080744	0.03863831188789268	-4.1256094371648135	3.993447067974564e-5	0.8541983278397592	0.0010308374792285617	0.10737876656940354	0.03174323613225219	3.382729036259259	7.279197226323875e-4	1	0.001544920044667422
ENSMUSG00000054717	Hmgb2	0.19360599061857248	0.04733896035291524	4.089781211400216	4.013255587313221e-5	0.8583952375704248	0.0010347502905365756	0.06478276448872874	0.03892146177685691	1.6644483925125655	0.095617290346039	1	0.13918489647322477
ENSMUSG00000017723	Wfdc2	0.310672920730802	0.07675501341451384	4.047591250528736	4.05199174958319e-5	0.8666399954008527	0.0010435285696756432	-1.075952194513596	0.06265388318687468	-17.1729530523177	6.373500223299916e-65	1.3878934086257896e-60	2.9793435602656814e-63
ENSMUSG00000020395	Itk	0.6471180845483139	0.15849343434469484	4.082933070533054	4.064120427228743e-5	0.8691934357714113	0.0010454421228470146	-0.2541099557628185	0.1303540669896849	-1.9493826439870614	0.05496689641593607	1	0.08457702870831849
ENSMUSG00000021484	Lman2	-0.12601622210378255	0.030743037797759887	-4.099016594676431	4.0774345426790666e-5	0.8720001512973452	0.0010476558430618003	0.07556952564860876	0.025302789630076983	2.986608463075573	0.0028212122670637683	1	0.005514949868118497
ENSMUSG00000036198	Arhgap36	2.11197809071268	0.4742687084245991	4.4531255239843635	4.092525779372653e-5	0.8751866379188419	0.0010503205434466078	-0.562446963283201	0.39131140041065754	-1.437338556180441	0.17057450101631907	1	0.2316625746612131
ENSMUSG00000055254	Ntrk2	0.47529004853356166	0.1165804468356233	4.076927661837783	4.187127211564443e-5	0.8953752829209405	0.0010733613777018482	-0.5811559732463415	0.09592085739917858	-6.0587028619629315	1.3767736925979037e-9	2.243452732088284e-5	5.142620687258008e-9
ENSMUSG00000027947	Il6ra	0.28459640460432717	0.06972518421727857	4.081687381670646	4.2051964363432345e-5	0.8991971539832738	0.0010767528872850784	-0.39196063405965287	0.05736864027552009	-6.832315219207092	9.760501372691962e-12	1.675780480677483e-7	4.27269163965707e-11
ENSMUSG00000021112	Mpp5	-0.10567894435761754	0.025736820524064164	-4.106138295474639	4.214452811601922e-5	0.9011343001767229	0.0010778826380569467	0.23905456074656892	0.021186410531422256	11.283391322565912	1.9889720210456316e-29	4.044972399200501e-25	2.311050466855684e-28
ENSMUSG00000030830	Itgal	0.6496442447505909	0.1603905569081888	4.050389606929678	4.253681025209487e-5	0.9094795400000404	0.001086666549850015	-0.43644518787934555	0.13155552627727687	-3.3175739570184155	0.001047732422643468	1	0.002177979646509698
ENSMUSG00000040990	Sh3kbp1	0.2623213973037349	0.06408490063584243	4.093341718579798	4.2661309939975645e-5	0.9120988065166793	0.0010877235675813034	-0.439862524593252	0.052762644924731456	-8.336627650504212	8.983850599127579e-17	1.6678518637280351e-12	5.421742871743634e-16
ENSMUSG00000022995	Enah	-0.15372252448805057	0.037648950198117086	-4.083049425790858	4.2715328387658964e-5	0.913211005599761	0.0010877235675813034	-0.6039998524690202	0.030971553860428484	-19.50176136434454	5.442031318546753e-85	1.1960496431902053e-80	4.4193663820797006e-83
ENSMUSG00000029075	Tnfrsf4	0.7297190794344524	0.17915049387567583	4.073218352056857	4.27248392461489e-5	0.9133716134041712	0.0010877235675813034	-0.17846754024766248	0.14752154087829328	-1.2097727503734519	0.23209238639903337	1	0.30211113196237815
ENSMUSG00000018451	6330403K07Rik	0.8375471602073523	0.20412454799383312	4.103118260096065	4.3060046908317526e-5	0.9204946227591038	0.0010950046900079695	-0.5297234414569032	0.16829285204000163	-3.1476288804648274	0.0016050745383220906	1	0.0032517994675593954
ENSMUSG00000019232	Etnppl	0.532478750845205	0.12804605837404348	4.158493885768412	4.3129032839442306e-5	0.9219262059759188	0.0010955069745552863	1.2615644190935351	0.10522757396797029	11.988914801718574	8.134043841442238e-32	1.6699192006480916e-27	1.0510488357487296e-30
ENSMUSG00000046589	Lrrc8e	0.24109353585198948	0.05916659451301976	4.0748252935013225	4.3200196044250013e-5	0.923404190445844	0.0010960633548239532	-0.36135910107514285	0.04848916348063775	-7.452368222838851	8.206585177225216e-14	1.4605259639907717e-9	4.098871532624877e-13
ENSMUSG00000027009	Itga4	0.5937115676722435	0.14591770740128204	4.068810963699579	4.351267960882003e-5	0.9300400139589193	0.0011027342072617934	-0.25822754294737876	0.11995844945530772	-2.1526415531369905	0.033025009199306336	1	0.053520719569829955
ENSMUSG00000028551	Cdkn2c	0.24798234056214064	0.06021701642196704	4.11814392836104	4.3972945870333845e-5	0.9398337720866453	0.001113130851605004	0.47054904740048864	0.04938662291626038	9.52786442187692	1.6940925519177618e-21	3.291113600610636e-17	1.3343452521317564e-20
ENSMUSG00000022391	Rangap1	-0.12993752504693618	0.03190737986187218	-4.072334538575053	4.403208734249397e-5	0.9410537706837812	0.0011133613357475378	0.4355282614295472	0.026140099415282135	16.661308532550066	6.558682038507533e-62	1.4246113255842212e-57	2.7483471570401345e-60
ENSMUSG00000105954	Gm42793	0.6266475873770835	0.15387400419297562	4.072472089510296	4.4364353686142566e-5	0.9481106026265528	0.0011204894822592034	-0.8273799823421867	0.1250926681873461	-6.61413649841615	6.152511566806532e-11	1.0383593771299385e-6	2.546968090660691e-10
ENSMUSG00000020788	Atp2a3	0.2000556658705446	0.04916079103709578	4.069415110094272	4.4475443314144946e-5	0.9504402236232775	0.0011220216430646703	-0.22547578961956086	0.04044311126847837	-5.5751346161960145	2.3435443959107483e-8	3.675557957455193e-4	7.938225963374952e-8
ENSMUSG00000052760	A630001G21Rik	0.5878171425862058	0.14622843157157045	4.019855347340595	4.5093912383249725e-5	0.9636118137176634	0.001136335950667825	-0.24799244742399068	0.120028630501545	-2.0661107803008596	0.039647217869870355	1	0.06311728159279424
ENSMUSG00000095210	Ighv5-9-1	1.6528974091695772	0.37879657184139115	4.363549018235768	4.53630032396962e-5	0.9693166532258285	0.001141823738785611	-0.2398697772396254	0.3096561654597313	-0.774632653877576	0.47400014604639784	1	0.5539669756646042
ENSMUSG00000037214	Thap1	-0.1471963564487608	0.036073857429203375	-4.080416316376493	4.556493370077762e-5	0.9735859383845155	0.0011456105534192124	-0.10295479144153019	0.029725941740465125	-3.463466097741173	5.428015838232314e-4	1	0.0011722680813016327
ENSMUSG00000027339	Rassf2	0.3875070580447837	0.09471336921946076	4.091365994455222	4.567904060716113e-5	0.9759783816126046	0.0011471832195823278	0.5635603250261888	0.07796601553750543	7.228281721734119	7.266136329003404e-13	1.2730270848413964e-8	3.4167117383063134e-12
ENSMUSG00000014550	Rbsn	-0.12954763770427538	0.03181134282197639	-4.072372500251054	4.59636977440546e-5	0.9820144023017265	0.0011530307085715432	0.06997914069903584	0.026157333159747335	2.6753163356394625	0.007516070951634404	1	0.013721701242600684
ENSMUSG00000019539	Rcn3	0.2787794171908302	0.06883965018053496	4.049692531262421	4.6068490947121796e-5	0.9842072405943101	0.001154044579438599	-0.20545428349494207	0.05664067481947207	-3.6273276077620196	2.933831240175859e-4	1	6.565491192311479e-4
ENSMUSG00000022148	Fyb	0.6076716719480784	0.14903960370014357	4.077249649500329	4.610784374279423e-5	0.9850018658773131	0.001154044579438599	-0.1334699506544032	0.12283238867778597	-1.0866022560590407	0.2808318736935527	1	0.35597527751824326
ENSMUSG00000074212	Dnajb14	-0.10466351467069222	0.02569679101078598	-4.073018869428511	4.718914422270614e-5	1	0.0011797816270780162	-0.005220824896595417	0.021146379215239063	-0.2468897792598483	0.8049544881531914	1	0.8477396022291112
ENSMUSG00000072812	Ahnak2	0.43350560528109455	0.10654073114950745	4.068919000309476	4.727373419259693e-5	1	0.0011805699882373448	-0.45070113209477475	0.08775237115948475	-5.136056452259871	3.163113064750278e-7	0.004745618531044842	9.709260422645666e-7
ENSMUSG00000026580	Selp	0.8318603289006515	0.20514750902651724	4.054937507396816	4.756183566235552e-5	1	0.0011864331898240725	0.07407857664227714	0.16820533290231676	0.44040563615957046	0.6591766509845481	1	0.7242184243324898
ENSMUSG00000008763	Man1a2	-0.08679156769408408	0.021277523394912956	-4.079025837886483	4.8369355735120266e-5	1	0.0012052256824884222	-0.28344072037493634	0.017443516355692086	-16.249058652812586	1.9604445642757202e-59	4.2496556819804786e-55	7.586409043425922e-58
ENSMUSG00000028843	Sh3bgrl3	0.33307407750610124	0.0830807742580541	4.009039160751587	4.845463236293621e-5	1	0.0012060000276372413	-0.2787544300909015	0.0680683186866084	-4.095215446326912	4.557954952250323e-5	0.6031541788312853	1.1245044422055876e-4
ENSMUSG00000002052	Supt6	-0.074870499944345	0.018444129994827557	-4.059313177978119	4.861770476529324e-5	1	0.0012087067583603798	0.09697375433692147	0.015149188496142852	6.4012507575314705	1.5939611777127818e-10	2.661118186191489e-6	6.382441994833023e-10
ENSMUSG00000006411	Nectin4	0.22006283268551138	0.0545629975960915	4.033188101477678	4.871260777206872e-5	1	0.0012097145485896218	-0.2687924242028749	0.044560132878583	-6.032127977160163	1.6200604570888051e-9	2.632922254860726e-5	6.007994205113834e-9
ENSMUSG00000061048	Cdh3	0.32744590586464206	0.08036083317963137	4.07469525773456	4.890139632555401e-5	1	0.0012130490185506158	-0.3072408212245994	0.0661330779642753	-4.645796486148265	3.579219385627482e-6	0.050935871076864696	9.92908746410636e-6
ENSMUSG00000031753	Cog4	-0.08521182350147771	0.021016086236891666	-4.054600011675664	4.98516285516636e-5	1	0.0012352434152595397	0.2060198838619468	0.017303716482460325	11.906106070957417	1.2466215220128543e-32	2.5665443895200646e-28	1.6669816998983184e-31
ENSMUSG00000028128	F3	0.22439867021148233	0.05542098919663893	4.048983489184838	5.0103628102713576e-5	1	0.0012401065950094325	0.46516857624310853	0.045582310195365634	10.205024147512434	2.9710012450031904e-24	5.880502764234815e-20	2.6883997032357055e-23
ENSMUSG00000029467	Atp2a2	-0.115972881571783	0.02852968170182032	-4.064990376825109	5.044893701755475e-5	1	0.0012472658861973453	0.08344248428258814	0.02345688283783981	3.5572707959295298	3.786795640502774e-4	1	8.351669124474896e-4
ENSMUSG00000048534	Jaml	0.6183915263235862	0.15251841680530434	4.054536752194241	5.05448255926707e-5	1	0.0012482496273723814	0.015923065778067617	0.12564472653483033	0.12673087217594875	0.8999676163719934	1	0.924822400216747
ENSMUSG00000054892	Txk	0.4572109996844322	0.11134236528524522	4.106352496761811	5.1156380108019194e-5	1	0.0012619518999817461	-0.24970796150527116	0.09084053949526853	-2.7488603974911148	0.006172282596688576	1	0.011443047830271412
ENSMUSG00000043832	Clec4a3	0.8296569243378076	0.20443504448456898	4.058291113588557	5.146734950939403e-5	1	0.0012664340059676431	-0.15213592222244862	0.1682291417832264	-0.9043375042505127	0.37293480622749525	1	0.453229142682178
ENSMUSG00000029787	Avl9	-0.09710284589996104	0.023862417031965004	-4.069279560820956	5.147566516327851e-5	1	0.0012664340059676431	0.08600161009412688	0.019578901494074877	4.392565646246975	1.123201353425081e-5	0.15513866940289917	2.9611793027324023e-5
ENSMUSG00000036768	Kif15	0.6539501315781543	0.1611755570745222	4.057377827307832	5.1508820969876284e-5	1	0.0012664340059676431	-0.196840805576532	0.13275599054473577	-1.4827263520752465	0.13910577657526324	1	0.19381606979187113
ENSMUSG00000026219	Trip12	-0.09066138337185638	0.022336664218124035	-4.058859572159994	5.160288315716576e-5	1	0.0012673463058831072	0.20573532140504985	0.018367476164869008	11.201066469793734	5.416508614795022e-29	1.0998762393202772e-24	6.1933573066703e-28
ENSMUSG00000066150	Slc31a1	-0.1112391473142585	0.02739902446422669	-4.059967443713077	5.204595580185055e-5	1	0.0012768187018158508	0.294904765864846	0.02250779866488745	13.10233711681909	6.213982689087549e-39	1.3045635257470401e-34	1.0991043625984662e-37
ENSMUSG00000026339	Ccdc93	-0.1776780242578098	0.04370686199091939	-4.065220337591944	5.211062646601956e-5	1	0.001276997301206389	-0.2515822994115096	0.03596531036865204	-6.995137726679898	2.6145431692501037e-12	4.53675530728278e-8	1.1872693889588584e-11
ENSMUSG00000050234	Gja4	0.2252459006592977	0.0554954229318711	4.058819426168183	5.2293216256266166e-5	1	0.0012785739137931836	-0.20698501725871973	0.04551527092230339	-4.547594973389315	5.320042665202828e-6	0.07490088068339061	1.4483821037982151e-5
ENSMUSG00000043822	Adamtsl5	0.3301727394295746	0.08219442667472684	4.016972351862589	5.230029027252046e-5	1	0.0012785739137931836	-0.26087983411956617	0.06753180432483805	-3.8630662504543087	1.120802714587466e-4	1	2.646326528256123e-4
ENSMUSG00000038884	A230050P20Rik	0.2761223778660444	0.06881460709237139	4.012554739946406	5.234734778057571e-5	1	0.0012785739137931836	-0.30224085518317867	0.05652487512831109	-5.3470415369710045	8.304258639084406e-8	0.0012750358714450198	2.678719324126807e-7
ENSMUSG00000038486	Sv2a	-0.22202129958765082	0.0547815375926016	-4.0528489951993505	5.241598488696924e-5	1	0.0012788465786402988	-0.4580961929650381	0.04507404090263263	-10.163193354565248	3.4010801761761626e-24	6.729377236582156e-20	3.06883353609472e-23
ENSMUSG00000024976	Shoc2	-0.0907558709288928	0.02235468774354115	-4.0598138506817	5.271748981377485e-5	1	0.0012847939384954044	0.10358580341213715	0.01830912234389546	5.657606163010551	1.5205251138179876e-8	2.39984478713893e-4	5.2300516783991406e-8
ENSMUSG00000032480	Dhx30	-0.0706014702265065	0.017490255898341647	-4.036617339212323	5.3034595739145854e-5	1	0.0012911080851113067	0.1345361714908223	0.014375417044998454	9.358766501847722	7.441483211552006e-21	1.4385875344572337e-16	5.670563114391906e-20
ENSMUSG00000049134	Nrap	0.4861591190379965	0.1163093488316099	4.179879983180432	5.324975513451552e-5	1	0.0012949292912547595	0.243765431883163	0.09406351613827894	2.591498190699286	0.009482538549784007	1	0.016995244886930643
ENSMUSG00000038267	Slc22a23	-0.18005994801211808	0.04460881814600486	-4.036420499256023	5.3317411669302906e-5	1	0.0012951590906699335	-0.4729092661313635	0.03670334446160811	-12.88463689258697	9.742969894833761e-38	2.038911309891861e-33	1.6361571556977058e-36
ENSMUSG00000020143	Dock2	0.6326418774010223	0.15780239784686373	4.009076452785954	5.364952634283986e-5	1	0.0013011319628814658	-1.2201203628659918	0.12965721958330065	-9.41035421542495	7.202303898286554e-20	1.3812578416133954e-15	5.21335276645329e-19
ENSMUSG00000047462	Gpr141b	0.7694511342914155	0.19214216398736653	4.004592840653171	5.368024546875132e-5	1	0.0013011319628814658	-0.08308054712385705	0.15834099043695557	-0.5246938704538171	0.606752415342924	1	0.678113126331546
ENSMUSG00000020732	Rab37	0.5547235879631522	0.13714275254552719	4.044862580536299	5.496664977498773e-5	1	0.0013308628119077825	-0.2554652387426643	0.11287850428422104	-2.263187666798089	0.024771515968455372	1	0.04113058740497728
ENSMUSG00000035314	Gdpd5	0.20322246648437065	0.05036972745294868	4.034615169879658	5.551583590995923e-5	1	0.0013424093671601282	-0.6073947737967084	0.04141489837242847	-14.66609354765615	1.1443207181041007e-48	2.4502195216045002e-44	3.031223845063612e-47
ENSMUSG00000096292	Gm2666	1.0938572706230512	0.2721148592364241	4.019836600222794	5.556420058219757e-5	1	0.0013424093671601282	-0.2795026533282561	0.22344911357884928	-1.2508559503845469	0.21557412959774191	1	0.283612603185677
ENSMUSG00000015947	Fcgr1	0.6646895967904508	0.1662388886872078	3.998400145955735	5.675999401879282e-5	1	0.0013698119597745759	-0.1056276783469283	0.13657891176823708	-0.7733820469017177	0.4425587311664858	1	0.523418528332012
ENSMUSG00000050359	Sprr1a	0.6318070990623473	0.15675419444765445	4.030559445561306	5.7801093297998746e-5	1	0.001393425923048505	-0.14605139016545965	0.12815730956923643	-1.1396259070697488	0.26348064050211245	1	0.33711159403211455
ENSMUSG00000051790	Nlgn2	0.2566319760100799	0.06467951018646739	3.9677476726435366	5.8372200719555054e-5	1	0.0014050162626816694	-0.3729524711579971	0.052649970237365604	-7.083621690128009	1.4774372787219606e-12	2.5751731768123773e-8	6.8168864954511396e-12
ENSMUSG00000071984	Fndc1	0.47938908440699285	0.12127538015447194	3.9528969836778183	5.840816336256996e-5	1	0.0014050162626816694	-0.39008788689765134	0.0990929323284719	-3.9365863713124702	9.472651649874357e-5	1	2.256460463134079e-4
ENSMUSG00000053687	Dpep2	0.625671456114644	0.15773586737446998	3.9665769525283685	5.857162997145105e-5	1	0.00140681822432188	0.11721982600607389	0.12958844798852623	0.9045545943759782	0.3665128852857153	1	0.4467511872150215
ENSMUSG00000028410	Dnaja1	-0.19736614271222563	0.04943490074298002	-3.992445412975822	5.8609522895437636e-5	1	0.00140681822432188	0.3131506409611516	0.040469619548713275	7.737919072459087	1.3620437494295668e-14	2.4569907195959954e-10	7.19364715607816e-14
ENSMUSG00000038156	Spon1	0.2891113719213468	0.07245134362125234	3.9904211222459782	5.921488366926758e-5	1	0.001419368861677135	-0.4677131197786978	0.05947385003900269	-7.864180971502157	3.97712291153573e-15	7.231602590045417e-11	2.1748577514028392e-14
ENSMUSG00000034786	Gpsm3	0.27641001014319705	0.06912823144652222	3.9985112357030075	5.93231041705904e-5	1	0.001419368861677135	-0.25494829938123126	0.05687355602012134	-4.482721271921751	7.6000586190068654e-06	0.1061728189075259	2.0418848627326946e-5
ENSMUSG00000078190	Dnm3os	0.3880343060750356	0.09756366809791242	3.977241873333567	5.932376258863582e-5	1	0.001419368861677135	-0.09843918186395388	0.08011567754567323	-1.2287130918643807	0.22030491091386192	1	0.28896513633248894
ENSMUSG00000060657	Marf1	-0.09679024070512528	0.02407434365147257	-4.020472670257195	5.9499253379205727e-5	1	0.001422038546660265	-0.13073800126361473	0.019817959879982507	-6.5969455007156945	4.609115409335038e-11	7.805076034167954e-7	1.9284961822699124e-10
ENSMUSG00000049734	Trex1	0.2952060926550315	0.07381793468835136	3.999110702586694	5.991513142271068e-5	1	0.0014304416194063684	-0.172442557126162	0.06075348606506374	-2.838397733119137	0.004649703098219697	1	0.008802905099845696
ENSMUSG00000100252	Mir124-2hg	1.7565687862391834	0.3598307736116029	4.8816524740466	6.0308081747251525e-5	1	0.0014382798788404006	3.392528155320883	0.29200260099458114	11.61814361846674	2.02012331997005e-23	3.9772187923570343e-19	1.7531109201502957e-22
ENSMUSG00000037818	Abhd18	-0.12226251422987182	0.03034944548788192	-4.028492523156293	6.0540632752578144e-5	1	0.0014422801064000175	0.15282598795841382	0.024974814375602037	6.119204157437499	9.692621078395431e-10	1.5868759229549e-5	3.6678658437989243e-9
ENSMUSG00000028460	Sit1	0.9695294915235223	0.24238714630415664	3.9999212264619004	6.0704207877601614e-5	1	0.001444630298913918	-0.1895599582391615	0.1996699625557178	-0.9493664235363638	0.35081728768813997	1	0.43036914038751806
ENSMUSG00000055653	Gpc3	0.3565002088529515	0.08905341348890859	4.00321778678762	6.083756637748138e-5	1	0.0014462571468646776	-0.16266526321423785	0.07327452727862781	-2.219942854024838	0.027278650131969756	1	0.04491469913322917
ENSMUSG00000079227	Ccr5	0.7020721327794495	0.17622728641959215	3.9839013982649414	6.0998518164415314e-5	1	0.0014485357819385327	-0.03146207942939519	0.14498245962170156	-0.21700610895613348	0.830300633455611	1	0.8688976580326192
ENSMUSG00000045136	Tubb2b	0.33901878615021613	0.08461040662140337	4.006821379161847	6.117476750514544e-5	1	0.0014511724432377303	-0.4355998145180958	0.06956968469393388	-6.261345245913956	4.6084263305208384e-10	7.611276927488216e-6	1.7876934149305992e-9
ENSMUSG00000032116	Stt3a	-0.06270596276624743	0.015657033704306874	-4.004970797820952	6.137765450785248e-5	1	0.0014544347076189835	0.0761283089846138	0.012886176126800392	5.9077501529940895	3.4743008965465823e-9	5.592234723081379e-5	1.255793847450585e-8
ENSMUSG00000036596	Cpz	0.7541359863900176	0.1910435571956848	3.947455739727252	6.200903750054131e-5	1	0.0014678330781112176	-0.21321783541032668	0.1566942588834496	-1.360725255217677	0.17658659266705334	1	0.23865575033009012
ENSMUSG00000031807	Pgls	0.13008764020784308	0.032510798847306455	4.00136707863827	6.239522072137171e-5	1	0.0014747817318437374	0.06216786414872564	0.02676089950971921	2.3230857440403705	0.01997668033452993	1	0.033771547950435
ENSMUSG00000060703	Cd302	0.14110533819717494	0.035389757094921655	3.987180183766314	6.244099862550743e-5	1	0.0014747817318437374	0.31278387643420924	0.02912066602490778	10.740958883518521	8.25736655837344e-27	1.6596481045674777e-22	8.53389053833569e-26
ENSMUSG00000073139	Tmem185a	-0.07530570333711033	0.018804330021984027	-4.004700154117211	6.250142344742459e-5	1	0.0014747817318437374	-0.07615154118074446	0.015488124365786525	-4.916769738042926	8.8186066025978e-7	0.012973052173081624	2.6020795055616452e-6
ENSMUSG00000031207	Msn	0.17174882364341834	0.04284963532091001	4.0081746870692125	6.257342899718342e-5	1	0.0014749167040427208	0.14185710988227995	0.035264398892059845	4.022671996096908	5.987674311929539e-5	0.7858223766976327	1.4594619122829434e-4
ENSMUSG00000076580	Igkv8-27	2.0153258768515627	0.4400746586411293	4.579509038476615	6.285063072294681e-5	1	0.0014798829462606237	0.2035268455861402	0.3588713475537369	0.5671303852299447	0.582518209253762	1	0.6556008437184138
ENSMUSG00000020303	Stc2	0.30112906304512194	0.0751621843392838	4.006390523269235	6.307272313634697e-5	1	0.0014832936645036718	-0.7585701824736126	0.061783638868531686	-12.277848899249213	1.9157022036078898e-34	3.9704843871977124e-30	2.7933348448544665e-33
ENSMUSG00000000628	Hk2	0.5836121855893591	0.14641270506861218	3.9860761080526843	6.312880770684361e-5	1	0.0014832936645036718	-0.196178866323733	0.12044379701292246	-1.6288000809430219	0.10375445608798928	1	0.1494846155409123
ENSMUSG00000032570	Atp2c1	-0.07721932333994636	0.019264219303934467	-4.0084325308825415	6.333377357231188e-5	1	0.0014865398689425226	-0.1334538883185839	0.01582043202275016	-8.43554007416953	3.0429621710040084e-17	5.67847170731058e-13	1.8855179968535282e-16
ENSMUSG00000030220	Arhgdib	0.26102991171904527	0.06551206280243482	3.984455694918888	6.355890952183116e-5	1	0.0014902521557115544	-0.2335851889133199	0.053886271764178095	-4.334781035428768	1.5111058917306748e-5	0.2071272845795236	3.934887910696226e-5
ENSMUSG00000070392	Gm20634	-0.41013525261990486	0.10460551637455355	-3.9207803453821946	6.366522304378648e-5	1	0.0014911735557339926	0.08973364449419127	0.08502299564681029	1.055404409260634	0.292196550958427	1	0.368241133630265
ENSMUSG00000037095	Lrg1	0.524404822346358	0.13057964769594585	4.01597669774261	6.426106192233012e-5	1	0.0015035466759555915	0.9461316622723952	0.10749167829695362	8.801906131362442	2.5836858291920387e-18	4.876190265434135e-14	1.7013789104868912e-17
ENSMUSG00000042677	Zc3h12a	0.22644290727177083	0.057072581661602166	3.967630352073581	6.46957498963303e-5	1	0.0015121272383857621	-0.002192641079032108	0.04673763806754024	-0.04691381870567651	0.9626285592555787	1	0.9725503120230603
ENSMUSG00000066319	Rtp3	-0.2906932831602882	0.07288443106172464	-3.9884139716217963	6.512877472930458e-5	1	0.001520650961701738	0.8114215587963644	0.06000061195507091	13.52355471647465	2.554501738711018e-41	5.394085871462186e-37	5.003540333455886e-40
ENSMUSG00000026430	Rassf5	0.2220218244075743	0.05587302313291804	3.9736855455163003	6.543144012896802e-5	1	0.0015261163252721882	-0.25556392771557196	0.045997396229127685	-5.556052052218926	2.977593889261989e-8	4.647428542360113e-4	9.972071286870639e-8
ENSMUSG00000096670	Ighv2-6	2.079257301466865	0.4967888809481007	4.185394201051138	6.585753497450156e-5	1	0.0015339114635376586	0.821329590465233	0.4086034729552931	2.0100895974398583	0.09903184338107666	1	0.143535535895801
ENSMUSG00000058952	Cfi	0.6785278870700285	0.16945542535574892	4.0041673829300555	6.590352609509693e-5	1	0.0015339114635376586	-0.4907707453459755	0.13941316271158247	-3.520261184815673	4.518215132055213e-4	1	9.865057884737567e-4
ENSMUSG00000038776	Ephx1	0.3460611307308408	0.08513490265549073	4.064856127588722	6.602162251836968e-5	1	0.0015350544646355734	-0.1782298950498252	0.07003864103492807	-2.544736625614173	0.01214655023046158	1	0.02135531678081547
ENSMUSG00000047090	Tmem198b	0.1435371571772012	0.03600913960510094	3.9861312642101616	6.642772678545045e-5	1	0.001542884497602357	0.026832250119437847	0.029675998171193898	0.9041734658645302	0.3650757427513312	1	0.4453075513627821
ENSMUSG00000103677	Pcdhga4	0.44080726686383154	0.11016140422907067	4.001467391857249	6.849557772110231e-5	1	0.0015892545358417596	-0.28730939719241777	0.09053067759431008	-3.173613683528592	0.0015055768335254034	1	0.0030608122542506856
ENSMUSG00000031028	Tub	0.48757768338604357	0.12189268697221078	4.000056898386382	6.863771084040405e-5	1	0.0015908934415727403	-0.748546256147212	0.10100786585781965	-7.410771921474692	9.392378914629906e-14	1.6694014282863196e-9	4.667034909098483e-13
ENSMUSG00000001227	Sema6b	0.2802069872670221	0.07075033836168075	3.9605038471276854	6.941167514796064e-5	1	0.0016071583597474215	-0.06440841814696387	0.05817409774962877	-1.1071666022937998	0.2681064112346837	1	0.34224288660334734
ENSMUSG00000042305	Tmem183a	-0.10825956450180649	0.027165329671168404	-3.9852107746259553	7.125457320040316e-5	1	0.0016481138339731504	0.3615930517957747	0.02230539643371487	16.211012114056064	7.599982747708167e-59	1.6465362622909744e-54	2.880872506290535e-57
ENSMUSG00000031934	Panx1	0.45239292870889947	0.1147777747068916	3.9414680225694987	7.142378172205956e-5	1	0.0016503121153660927	-0.1339935513717831	0.09440677453590313	-1.4193213572912082	0.1558502072771508	1	0.2141821358856082
ENSMUSG00000047804	Akap10	-0.09198403869484642	0.023131994949943523	-3.9764853353070184	7.160679038182793e-5	1	0.0016528243701100136	0.023526838952543747	0.01905216071851971	1.234864606704394	0.21733410064157682	1	0.285607197813355
ENSMUSG00000032333	Stoml1	0.11857571448896283	0.02993153690017529	3.961564515862478	7.184335567111037e-5	1	0.00165656632853666	-0.11022799385606338	0.02463378599174558	-4.474667186481168	7.735132377920872e-6	0.10802112365766497	2.0769208463993884e-5
ENSMUSG00000041915	Ammecr1l	-0.08053742961471498	0.020279652719007762	-3.971341656123562	7.31923136247769e-5	1	0.0016855116066533818	-0.03442122066535626	0.01669626092089889	-2.0616125268065764	0.03955238224314032	1	0.06298825170630562
ENSMUSG00000005465	Il27ra	0.5326434733710551	0.13584130176486875	3.921071621450018	7.325017858225789e-5	1	0.0016855116066533818	-0.16733915414680328	0.11138067610272309	-1.5024074193307226	0.13625097581434828	1	0.1902196299940434
ENSMUSG00000069089	Cdk7	-0.08225109131106255	0.02076860533658322	-3.9603569897002155	7.3500730802097e-5	1	0.0016895297118568805	-0.009987529307373729	0.017065812459045128	-0.5852360871386579	0.5584008042044923	1	0.633184339517615
ENSMUSG00000020914	Top2a	0.7909513159135884	0.19455504809480284	4.06543712773864	7.362656763421387e-5	1	0.0016906757032289915	-0.21073415000009485	0.16006105529863235	-1.3165860340413205	0.19634604890940666	1	0.2617515987228571
ENSMUSG00000036103	Colec12	0.22516932737680892	0.05723035200916171	3.934438972885624	7.402979454248593e-5	1	0.001697474894574745	-0.19781035711400735	0.04696308242543999	-4.212039476498525	2.6700827679282908e-5	0.35995385794441287	6.773687341143815e-5
ENSMUSG00000073421	H2-Ab1	0.6042497144782017	0.15012276353002196	4.025037244650524	7.407523808512326e-5	1	0.001697474894574745	-0.06433303652394902	0.12341895410636172	-0.5212573464891559	0.6116060210801307	1	0.6822600312080485
ENSMUSG00000032540	Abhd5	-0.12355113915948278	0.031147894634533185	-3.966596799210421	7.461459003026948e-5	1	0.0017068271881482437	0.3602596737159556	0.02564036393133443	14.05048987138952	1.5680494823604744e-44	3.3328891747571882e-40	3.4995656000002926e-43
ENSMUSG00000074582	Arfgef2	-0.08574652269777838	0.02161003876308079	-3.9679023086376963	7.463677381098562e-5	1	0.0017068271881482437	0.07634414425537611	0.017787483206188816	4.292014973136482	1.8036890276263346e-5	0.24573459312381182	4.651586063249139e-5
ENSMUSG00000005470	Asf1b	0.6314525338048022	0.158258896397637	3.98999707554027	7.5357379194658e-5	1	0.0017204965435455334	-0.23931167000683995	0.13037105219117864	-1.8356196869218226	0.06828899576175154	1	0.10290782292874238
ENSMUSG00000040329	Il7	0.2593355646981854	0.06527379733930364	3.973042403985135	7.538915688988787e-5	1	0.0017204965435455334	-0.06575332950607496	0.053764117503597615	-1.2229965367082438	0.22046121903035126	1	0.2890849540128674
ENSMUSG00000049550	Clip1	-0.07327261654320219	0.01850016648365158	-3.9606463329912467	7.670667139836587e-5	1	0.001748244447710661	0.0281630168942866	0.015217464178364544	1.8507036759992783	0.06406028593920156	1	0.09714478446351624
ENSMUSG00000095130	Ighv1-39	2.9947911473787423	0.6028240600169618	4.96793566483474	7.676216014620987e-5	1	0.001748244447710661	-0.5642783535510897	0.49470908000267794	-1.1406266356543024	0.3130112066452591	1	0.3909301952774843
ENSMUSG00000031799	Tpm4	0.18797736279926175	0.047873141856017556	3.92657251041971	7.728074612307964e-5	1	0.0017582555030517845	-0.23716929831569572	0.03904848183703058	-6.073713679971614	1.2176148799476754e-9	1.9871474840746062e-5	4.567287372507708e-9
ENSMUSG00000055013	Agap1	-0.09135376873808154	0.02319648422556062	-3.9382592572980175	7.826849850960017e-5	1	0.0017778607487703173	0.2449161402648503	0.018896765501549846	12.9607440090614	2.6622479306744227e-38	5.58007166269359e-34	4.584959652123574e-37
ENSMUSG00000030102	Itpr1	-0.12495882226813558	0.03161470051112317	-3.9525543575581445	7.830225759718264e-5	1	0.0017778607487703173	0.12223858713925155	0.02596915659430318	4.707068044176178	2.633506281557499e-6	0.037793448646631665	7.416548319318556e-6
ENSMUSG00000020523	Fam114a2	-0.07295483766115234	0.018427707287007874	-3.958975282431789	7.85298018346449e-5	1	0.0017812096030812268	0.00946034287493829	0.015059608655481109	0.6281931417583747	0.5298783344711168	1	0.606935180701988
ENSMUSG00000000078	Klf6	0.2574562000080938	0.06550957031603	3.9300547807912434	7.911834977834935e-5	1	0.001792731569162985	-0.31693610267426897	0.053594685179696386	-5.913573362948606	3.719581547908157e-9	5.979599296417153e-5	1.3400972963488408e-8
ENSMUSG00000037306	Man1c1	0.202567211468012	0.05169181875402908	3.9187480021144165	7.9572616185637e-5	1	0.0018011905216140476	-0.24394450610292764	0.04243704755059884	-5.74838543638235	1.0108730119657388e-8	1.6033456842788583e-4	3.519470409834088e-8
ENSMUSG00000021569	Trip13	0.48904725794502174	0.12436818147691198	3.93225383001849	7.98873260491631e-5	1	0.0018064765161787887	-0.3102483363677392	0.10271910377111709	-3.0203567299326055	0.002389264396217368	1	0.004724386570712934
ENSMUSG00000003282	Plag1	0.24803091020315712	0.06248477878134741	3.969461283860668	8.027793266962955e-5	1	0.0018126981680155572	-0.2550340748563603	0.051422717180015703	-4.959560459700361	6.711982008708365e-7	0.00993373337288838	2.0041373010704487e-6
ENSMUSG00000045382	Cxcr4	0.4058218865186049	0.10436055802408924	3.888651940946217	8.032539632660732e-5	1	0.0018126981680155572	-0.41486877627313234	0.08517107433029078	-4.871005555997616	1.4310066115051875e-6	0.02082400821062349	4.135237417221029e-6
ENSMUSG00000048458	Inka2	0.46813192297959266	0.11771505297231875	3.9768229394559764	8.063730277814345e-5	1	0.001817054615475142	-0.1592201133924205	0.09687109455871085	-1.6436287224557133	0.10040951813781335	1	0.14532406583091484
ENSMUSG00000045573	Penk	0.7606188302045097	0.1897931854664538	4.007619284829118	8.068176531793809e-5	1	0.001817054615475142	0.08793917039673815	0.15619728550558137	0.5630006316185042	0.5750778005972241	1	0.6486240947429458
ENSMUSG00000005696	Sh2d1a	1.4405308929351763	0.3597642617610014	4.004096698999385	8.122087340382043e-5	1	0.0018273464652258933	-0.6903972176573611	0.2961495248250343	-2.3312454006645766	0.02665948609929241	1	0.043976590199077424
ENSMUSG00000034792	Gna15	0.6007664967618058	0.15285954009749084	3.9301864730107696	8.130616785949971e-5	1	0.0018274177182239677	-0.14255098455393098	0.12592212913052775	-1.1320566570643527	0.26056886508707383	1	0.33392373535981573
ENSMUSG00000011256	Adam19	0.3987316650283571	0.10235536182355931	3.895562068508856	8.144570707978209e-5	1	0.0018287067893362576	-0.10479477156430136	0.0840614962555321	-1.2466441383073146	0.2165735482818207	1	0.284725437094168
ENSMUSG00000027368	Dusp2	0.6196675561739379	0.15600320872339815	3.97214622215009	8.1722879711527e-5	1	0.0018330804399810355	-0.3426993194789058	0.12850845835726862	-2.6667452388710586	0.008231871790350728	1	0.014926850232833024
ENSMUSG00000008461	Fut1	1.317511278038654	0.32113019522833364	4.102732466817273	8.2552162453191e-5	1	0.0018498168849405369	1.0872001128783968	0.26434838873176325	4.112754831207194	8.67441198197412e-5	1	2.077209868821633e-4
ENSMUSG00000043895	S1pr2	0.3292669027280272	0.08476720405744677	3.8843666768209424	8.276744616051861e-5	1	0.001852775095088229	-0.17157869870051495	0.0695363643641746	-2.4674672061070964	0.013574967405737172	1	0.02367400264480428
ENSMUSG00000098112	Bin2	0.6647731092758792	0.17026844361063267	3.904264907689368	8.288862909087549e-5	1	0.0018536230009055985	-0.09492093352340214	0.13997545524199345	-0.678125556793512	0.5027225293420421	1	0.5812822175525499
ENSMUSG00000027263	Tubgcp4	-0.10225545688299352	0.02601564987187702	-3.930536326656668	8.409334682464966e-5	1	0.0018782789839629703	0.05852027488198362	0.021397428342389974	2.734920942160624	0.006315921833752601	1	0.01168500679494713
ENSMUSG00000027763	Mbnl1	0.10080485928494698	0.025555071090327782	3.9446127513650366	8.415999941625461e-5	1	0.0018782789839629703	0.0635005660759344	0.02099310019537252	3.0248303244859347	0.002507173258423441	1	0.004940681476271771
ENSMUSG00000084796	Mir142hg	0.9496544296511644	0.2413391944713952	3.9349366012892797	8.450812113668668e-5	1	0.0018841585204533219	-0.09391782022154668	0.19877899986194095	-0.4724735524717195	0.6437157977518975	1	0.7107994747544771
ENSMUSG00000046591	Ticrr	0.6539347630609773	0.1659780790792131	3.93988631925838	8.588180627067707e-5	1	0.0019128689402691044	-0.1957548293115464	0.13686081375816653	-1.4303205127615692	0.1524104016245883	1	0.20988264924797093
ENSMUSG00000032125	Robo4	-0.1411440403775879	0.03619315912704101	-3.8997435919357173	8.608078845704441e-5	1	0.0019153836239576953	-0.2049043758934509	0.02950402739863999	-6.944962907094375	3.710123566651305e-12	6.418513770306758e-8	1.667083188238251e-11
ENSMUSG00000026288	Inpp5d	0.33941759261602517	0.08726996041084657	3.8892832197714595	8.620524950629256e-5	1	0.0019162367699945212	0.0016192443299005443	0.07161626248507068	0.022610008868280393	0.9820428646217984	1	0.9862981620717506
ENSMUSG00000005947	Itgae	0.37619177720614083	0.09672550000243724	3.8892719830516436	8.809034462763579e-5	1	0.001956185886536451	-0.3296136991047625	0.07957876619653526	-4.141980516394503	4.009239273815628e-5	0.5331486386320022	9.962565848215655e-5
ENSMUSG00000020149	Rab1a	-0.06650407625919513	0.016928136269346545	-3.9286118212328347	8.860145203253177e-5	1	0.0019655741866160164	0.10165250682409513	0.013855232332568917	7.3367594554978925	2.306620612129836e-13	4.076029283694633e-9	1.1203801624208902e-12
ENSMUSG00000035133	Arhgap5	-0.15430011176467068	0.039054038112376864	-3.9509387306039025	8.870445043325235e-5	1	0.001965899130070018	-0.0404837382645462	0.03198575879131886	-1.2656800962162496	0.20596450315458292	1	0.27253307324527976
ENSMUSG00000027692	Tnik	0.34422858733742956	0.08801505453075952	3.911019417901156	8.899688815724904e-5	1	0.0019704176700367643	-0.34178032605328534	0.0724245711090193	-4.719121160397485	2.6941908492117427e-6	0.03864816773194245	7.581692245581192e-6
ENSMUSG00000046179	E2f8	0.8388199890269472	0.21443727226604278	3.911726632981325	8.936118857568825e-5	1	0.0019765167067570966	-0.3412448467914087	0.1766890936426494	-1.9313294315809353	0.05817206961444494	1	0.08900410651110598
ENSMUSG00000000693	Loxl3	0.2845615786128334	0.07368768318946853	3.8617251390732155	8.967669245959315e-5	1	0.001980464067491283	-0.23950253897291185	0.060259023597402935	-3.974550609599224	7.287890831015867e-5	0.9500494487312284	1.7595796319545799e-4
ENSMUSG00000030352	Tspan9	-0.09891032488435439	0.025332951997149064	-3.9044137017859435	8.973602363610608e-5	1	0.001980464067491283	-0.22365507891103426	0.02075232643260461	-10.777349693171892	4.153780299623024e-27	8.361559743141148e-23	4.355596863662201e-26
ENSMUSG00000055633	Zfp580	0.22019139723485995	0.05632355389588261	3.9094016979449955	8.980667134504986e-5	1	0.001980464067491283	-0.18307481621198557	0.04639657884736746	-3.945868871372037	7.667522996580956e-5	0.9977747675450798	1.846629009599771e-4
ENSMUSG00000026770	Il2ra	0.6208181627068765	0.15975277177403108	3.8861182551813154	8.99684895565078e-5	1	0.001980730058083413	-0.10946600960434899	0.1314166154229918	-0.8329693262302472	0.40770408114384366	1	0.4882311775217515
ENSMUSG00000027706	Sec62	-0.08849963930174712	0.022480279369061756	-3.936767770935436	8.999676817771473e-5	1	0.001980730058083413	0.10561725198299633	0.018296309257666857	5.772598751780425	8.142845290766936e-9	1.2960966849313732e-4	2.8600860389085254e-8
ENSMUSG00000101493	2810405F17Rik	0.2187891811990668	0.05604185457860758	3.904031778466223	9.073255067226137e-5	1	0.0019949505780716284	-0.2441041092579084	0.04630156427042377	-5.272048862803448	1.3153835298918572e-7	0.0020037237310842663	4.1699100902726476e-7
ENSMUSG00000086652	Gm14029	1.3390558559060834	0.3421468359829605	3.913687677570021	9.102713427917215e-5	1	0.001997972460944309	-0.4089255029182557	0.2791413272220974	-1.4649407416225981	0.1429219736878063	1	0.198526095629826
ENSMUSG00000045875	Adra1a	-0.21904845250140323	0.05506422716557338	-3.9780536979615353	9.104957419430719e-5	1	0.001997972460944309	0.004027345193825036	0.04472684131440609	0.09004313909660923	0.9282943337860642	1	0.9470211004114307
ENSMUSG00000002068	Ccne1	0.5605026867685443	0.1425151528633894	3.9329339758406237	9.135603737534801e-5	1	0.002002722352353565	0.17720893906794452	0.11733990854481396	1.5102188272139792	0.13156512469627582	1	0.18448058121674776
ENSMUSG00000039899	Fgl2	0.5381478946431448	0.13849557033308146	3.8856686415955446	9.215464861347399e-5	1	0.0020182412266716633	-0.14647209426230554	0.1137067596122852	-1.2881564364488343	0.20031137407916075	1	0.2662084682933408
ENSMUSG00000047496	Rnf152	-0.15920080728161037	0.04057059095784334	-3.9240445732485134	9.239901902837826e-5	1	0.0020216033160279693	0.34212079073806184	0.03337304610068114	10.251410365896422	1.5744852670370684e-24	3.120944696320877e-20	1.4417231142733257e-23
ENSMUSG00000050751	Pgbd5	0.6029729578703017	0.15470239206279995	3.897631767875513	9.326340327376051e-5	1	0.0020385107919886495	-0.18390510592834314	0.12712956510886528	-1.4465958864160282	0.15117514950436511	1	0.208323419311428
ENSMUSG00000056145	AI504432	0.581302122118615	0.14869596263997883	3.909333594524404	9.365712472308412e-5	1	0.002045107637108287	-0.9926733713835537	0.122375780402826	-8.111681642527284	1.5726232427212928e-15	2.8753843369916116e-11	8.818659217185354e-15
ENSMUSG00000063297	Luzp2	0.7764250757563553	0.1935965540853671	4.010531486082071	9.466936727394208e-5	1	0.0020637656923210303	-0.5475820440054686	0.1593432290197646	-3.4364939594486796	5.901351884792685e-4	1	0.0012691956387833176
ENSMUSG00000076501	Igkv2-137	1.4481136877531373	0.3441510109854564	4.207785656670158	9.476142596813686e-5	1	0.0020637656923210303	-0.44795592999135214	0.2829547473599975	-1.5831362935976014	0.16031622481755722	1	0.2194252517940251
ENSMUSG00000082286	Pisd-ps1	0.2703081728595528	0.06924063076139764	3.9038952979939108	9.478983135823527e-5	1	0.0020637656923210303	0.02368011698960427	0.056985405730509364	0.41554704552934674	0.6781573676110676	1	0.740379745189827
ENSMUSG00000032737	Inppl1	-0.07593554418090644	0.019493217681111705	-3.8954853643524183	9.498852656258204e-5	1	0.002065414367710124	-0.024545868585205095	0.0159816830297521	-1.5358750727010155	0.12445431717976349	1	0.17570965478369924
ENSMUSG00000006333	Rps9	0.13798552198491232	0.035371294847506014	3.901059392363226	9.505120275651281e-5	1	0.002065414367710124	-0.12882757060288638	0.029111470016324432	-4.425320003787014	9.768460285562434e-6	0.13554715492246433	2.5950096682670693e-5
ENSMUSG00000005973	Rcn1	0.25599290210042497	0.06583358637396955	3.888484832745554	9.527950161181463e-5	1	0.002066729890166159	-0.2902279762568885	0.05410064514675792	-5.364593628589676	8.332220821839565e-8	0.0012792458627770285	2.6873495507573875e-7
ENSMUSG00000035095	Fam167a	0.47846189307869924	0.12327591081027824	3.8812278078809137	9.529750875513365e-5	1	0.002066729890166159	-0.25178886803711426	0.10137187624696531	-2.4838138284399354	0.013626192986352816	1	0.023755889692026678
ENSMUSG00000050666	Vstm4	0.2507447330463986	0.06502571457575695	3.856085775947503	9.60703904294234e-5	1	0.0020814627628481987	-0.15803613819961054	0.05318329995258315	-2.9715368986225275	0.002957553788921524	1	0.005761054832994207
ENSMUSG00000079033	Mef2b	1.5160248983422098	0.38380130518647404	3.9500253851550418	9.618760168896083e-5	1	0.0020819750244952017	-0.28931841623371973	0.31489553272667664	-0.9187758674393219	0.3903764093954854	1	0.470862736056553
ENSMUSG00000057246	BC051142	0.497336905271603	0.12480538471805505	3.984899420767183	9.719146613729293e-5	1	0.00210165919632741	-0.05453255230742492	0.102454778363956	-0.5322597264688407	0.5971640782961806	1	0.6693953605122576
ENSMUSG00000018507	Trpv2	0.4514731366333226	0.11628092507149669	3.8826070256641754	9.7919594749242e-5	1	0.0021153484492867805	0.05964694700732853	0.09577278340553227	0.6227964238521134	0.5346648335500633	1	0.6110651400340263
ENSMUSG00000027219	Slc28a2	0.7023010734513695	0.17702041408985641	3.9673451057168925	9.842761236652432e-5	1	0.0021242607204340763	-0.3613104377413324	0.1453407235200349	-2.4859545830699443	0.013702383240961402	1	0.023879364778714926
ENSMUSG00000003573	Homer3	0.17386895907940655	0.044905710337421745	3.871867470149214	9.879147765204538e-5	1	0.0021300476446081996	-0.39973713935917693	0.036844405068025984	-10.849330817559423	1.8233765697962177e-27	3.6772035283080324e-23	1.9458969810328842e-26
ENSMUSG00000000627	Sema4f	0.8634679216834469	0.22327133707813837	3.867347833283493	9.899793093127892e-5	1	0.0021324326826252537	-0.26186546277516426	0.1837731258156075	-1.4249388294015974	0.16246813376849478	1	0.22204277651758356
ENSMUSG00000026166	Ccl20	1.7181224871960377	0.4083970012165204	4.206990947725246	9.916455087735941e-5	1	0.0021339559202825185	-0.7708254162935544	0.3353585850257193	-2.29851105864619	0.030260852861889363	1	0.04939365001686475
ENSMUSG00000091575	2010016I18Rik	0.488761680462321	0.12549771092351608	3.894586418075739	9.942712721137293e-5	1	0.0021371301429614752	-0.14431224235429496	0.10334557495091097	-1.3964046590562114	0.16414908795727384	1	0.2240648644952641
ENSMUSG00000028972	Car6	-1.530745410764657	0.3813631509104586	-4.013878653745614	9.950414939140211e-5	1	0.0021371301429614752	-1.1203353657238846	0.3104793316871906	-3.6084056211916473	4.405688347699441e-4	1	9.633546720190671e-4
ENSMUSG00000060261	Gtf2i	-0.07997100687800657	0.02049373419352923	-3.9022174349883447	9.984868388014251e-5	1	0.002142461972051158	0.025193749468336836	0.01681627379832733	1.4981766930342673	0.13471859367877734	1	0.18828110218871144
ENSMUSG00000039055	Eme1	0.6915332393980723	0.17791839521164612	3.8868001174102664	1.0063430730830115e-4	1	0.002157238893947022	-0.24429663361320061	0.14644363400207952	-1.6681956527364759	0.09644087672154113	1	0.1402279974574997
ENSMUSG00000019838	Slc16a10	-0.21910685976304525	0.05595348989154527	-3.9158747772076485	1.0201157336094467e-4	1	0.0021846578622275073	-0.23774059572038497	0.04592539357415026	-5.176669751050333	2.3630784630085549e-7	0.0035639949379095022	7.333453121395168e-7
ENSMUSG00000059791	Nrm	0.34141857063308795	0.08823862748379166	3.8692642935295236	1.0228618320614926e-4	1	0.002188432560115411	-0.1959263092219666	0.07272921237138917	-2.6939149048043554	0.007044095739301189	1	0.012914078791727013
ENSMUSG00000001506	Col1a1	0.649517455464564	0.1682187377667685	3.8611480747472102	1.033202767544896e-4	1	0.002208433696507347	0.0647188940827344	0.13768022857752835	0.47006672455000253	0.6467956742053759	1	0.7136336860586017
ENSMUSG00000096929	A330023F24Rik	0.2327384382520542	0.059197457771378796	3.931561371282066	1.0371832113791136e-4	1	0.0022148141685601396	-0.09173716592462622	0.048461068682633626	-1.8930074886586414	0.05891077045619626	1	0.08998582779026726
ENSMUSG00000000903	Vpreb3	0.9974829856122676	0.24930361717478897	4.00107706785868	1.039914121127546e-4	1	0.002218516693116877	-0.02015017956855281	0.20268286045343625	-0.09941728434004439	0.9224231223308254	1	0.9421978009081525
ENSMUSG00000005580	Adcy9	-0.15393134380661103	0.0395043204600421	-3.8965698438556813	1.0423066926351338e-4	1	0.0022214910170329847	0.0022436519347676983	0.03251757843437239	0.0689981247925912	0.9449568008626615	1	0.9597952150451948
ENSMUSG00000090164	BC035044	0.8413022688671317	0.21073795156354502	3.9921725660954284	1.0519388846519189e-4	1	0.0022398748442478324	-0.23385022566501035	0.17338298506471855	-1.3487495648879342	0.18650535952436073	1	0.25038800258094307
ENSMUSG00000030365	Clec2i	0.8057327485043355	0.2089064673294815	3.8569066760080535	1.060748528845429e-4	1	0.002256473758636677	0.2234138574689731	0.17209403574724072	1.2982080203936133	0.1961865837878394	1	0.2616330641811936
ENSMUSG00000039087	Rreb1	-0.10976590107396955	0.02838914821565899	-3.8664739160234642	1.06513161417581e-4	1	0.002262443026894186	0.029197603269199755	0.02330575536869095	1.2528065624692835	0.2097633531506221	1	0.2769010661458527
ENSMUSG00000093894	Ighv1-53	1.95749309636617	0.44544448767985906	4.394471478504456	1.0655881947710696e-4	1	0.002262443026894186	-0.42528306696479445	0.36518875490291475	-1.1645568524634766	0.29482290687174156	1	0.3710796565627902
ENSMUSG00000038352	Arl5c	0.6119503644149555	0.15804760892312666	3.8719368713297286	1.0707007715822405e-4	1	0.0022711308740206325	-0.2330761608195487	0.13015333676443092	-1.7907812939241152	0.07503700041024822	1	0.11207949896814345
ENSMUSG00000059663	4930524N10Rik	1.083717277142737	0.27695923702774466	3.912912559887557	1.0761223280316229e-4	1	0.002279584972920886	2.9804926661450106	0.23090879736085415	12.907661813712656	2.8281437676502087e-34	5.8576513715571124e-30	4.086300452856155e-33
ENSMUSG00000056211	R3hdm1	-0.08646888148431475	0.022317323262005	-3.874518483653776	1.0767353406767567e-4	1	0.002279584972920886	0.1611586827451459	0.01836562068571282	8.775019668707206	1.9887000975975685e-18	3.7584443144496445e-14	1.31973056581102e-17
ENSMUSG00000076437	Selenoh	0.18893333445299768	0.048870878620781724	3.865969669157046	1.0800831275077088e-4	1	0.002283153528376222	-0.10174125568120107	0.04025759753080112	-2.52725601927335	0.011405209203132776	1	0.020161858264789653
ENSMUSG00000026663	Atf6	-0.07493032416846104	0.019330796072136166	-3.87621512786363	1.0804730867737009e-4	1	0.002283153528376222	-0.06562901530097358	0.015914532904970403	-4.1238417547571515	3.8226945692788554e-5	0.5092593705193291	9.525058998994827e-5
ENSMUSG00000021749	Oit1	0.506356047757857	0.13029532432258317	3.886218100230738	1.0822847879705369e-4	1	0.0022848120319859974	-0.4156802239223578	0.10712307134872417	-3.880398673122142	1.190102557841484e-4	1	2.799257083988463e-4
ENSMUSG00000022100	Xpo7	-0.07522621985388547	0.019393445652069043	-3.878950713735584	1.0910538352436124e-4	1	0.0023000969546982824	-0.0011267774392720305	0.015911967304515464	-0.07081320729915502	0.9435852823063555	1	0.9587960597588235
ENSMUSG00000035385	Ccl2	0.6904660730705433	0.17987531191634298	3.838581658119195	1.0918166911975912e-4	1	0.0023000969546982824	0.02237277684656966	0.14758997844653163	0.1515873711891271	0.8816044835522688	1	0.9101132673063717
ENSMUSG00000047798	Cd300lf	0.9171285796348982	0.23410485831817715	3.917597380180843	1.0926261656177631e-4	1	0.0023000969546982824	-0.07644848504596513	0.19267554584139943	-0.39677315931360374	0.6968425451459087	1	0.7568061046486535
ENSMUSG00000034796	Cpne7	0.5676152479088956	0.143512230419532	3.9551698572977037	1.0971072249248329e-4	1	0.002307347151399098	0.057522291526303324	0.117474206152103	0.48965890820172675	0.6268403916737171	1	0.6963467576201636
ENSMUSG00000024978	Gpam	-0.17090917827773006	0.04399362608237542	-3.8848622743147585	1.0986279798813893e-4	1	0.002308363661977412	0.44707026652121806	0.03620873521451586	12.347027971912985	1.3690870114401596e-34	2.838938826922315e-30	2.0094693332160286e-33
ENSMUSG00000032399	Rpl4	0.08665504350024872	0.022388270155435826	3.870555558720067	1.0999995477388878e-4	1	0.002309065088371509	-0.010513459902232368	0.01838795879644346	-0.5717578562480707	0.5675113393685122	1	0.6417163742396974
ENSMUSG00000038034	Igsf8	0.15054518627701946	0.03908533732397561	3.8517049252808286	1.1028449214864377e-4	1	0.0023128560177186354	-0.11300714866002233	0.032109004392420266	-3.5194846678802376	4.3042849818512294e-4	1	9.421074673536465e-4
ENSMUSG00000020689	Itgb3	0.4946289999918301	0.12661177625384312	3.90665872185658	1.1111558104225059e-4	1	0.002327539244111145	-0.06868523805121653	0.10422030730849256	-0.6590389130969257	0.5087221184421904	1	0.5871453839647895
ENSMUSG00000036955	Kif1bp	-0.07388029955252207	0.019126796532691063	-3.8626593547041517	1.1119384371444642e-4	1	0.002327539244111145	-0.0034344178142472594	0.015729738067196155	-0.21833916112116472	0.8272565948378314	1	0.8667028320499464
ENSMUSG00000055540	Epha6	0.8413880537590325	0.20852377021426344	4.034974300025771	1.1270187342449601e-4	1	0.0023568885202711097	-0.34696348969228324	0.17061443978369129	-2.0336115168925395	0.046308160783380535	1	0.07257380515502186
ENSMUSG00000062593	Gm49339	0.6398782117785573	0.1640408418391479	3.900724993876812	1.1280834253733752e-4	1	0.0023568999340829082	-0.2621438338864204	0.1350015260924389	-1.9417842262532943	0.05398972876881749	1	0.08325660304400097
ENSMUSG00000046203	Sprr2g	1.7433272313172712	0.43599706423500806	3.9984838759776493	1.1304797507565661e-4	1	0.002359690894379395	0.4975078641299426	0.35866404801580487	1.3871138378163272	0.18276388856528497	1	0.24597346425126448
ENSMUSG00000000732	Icosl	0.21232999438071204	0.05565861978819572	3.8148627326497904	1.1564282284781602e-4	1	0.0024115918005499105	-0.2733633302506685	0.04529036965489754	-6.035793753366019	1.6456973028301248e-9	2.67409354736867e-5	6.100018438326354e-9
ENSMUSG00000047415	Gpr68	0.38498014594462443	0.09960199838593552	3.865184957965525	1.1651837170793819e-4	1	0.0024275751768476897	0.4712228717538381	0.08207252034637423	5.741542598729949	1.051144690973006e-8	1.6663796785995066e-4	3.6551055663135426e-8
ENSMUSG00000090440	1700049E17Rik2	1.5380736588524593	0.38365161812674103	4.00903733017581	1.1783638298395607e-4	1	0.0024527384076482757	0.023761601430158465	0.3157393705687141	0.07525701146283639	0.9426017033809544	1	0.9581028962555213
ENSMUSG00000087651	1500009L16Rik	0.4577470815113797	0.12030588008125839	3.8048604208057233	1.1966961001628837e-4	1	0.0024885686845536755	-0.15662758548362754	0.09907584347163559	-1.5808857133622933	0.11536576051515011	1	0.16422516391930173
ENSMUSG00000006932	Ctnnb1	-0.06259413171878685	0.016296308995548806	-3.841000544103814	1.2061576148099471e-4	1	0.0025059022490323186	-0.029879522414832594	0.013400490790418789	-2.2297334390316617	0.025824722806039115	1	0.04270406563296495
ENSMUSG00000038508	Gdf15	0.515253378986308	0.13258096280627152	3.88633004377258	1.2138404982817995e-4	1	0.0025195116536630897	0.5938026673513808	0.10904990571050607	5.445237787988043	6.962957170626895e-8	0.001071807997274598	2.2588243184665264e-7
ENSMUSG00000036572	Upf3b	0.08193186397036602	0.021333678427960526	3.8404939985869375	1.2249757301729754e-4	1	0.0025402548902217032	-0.06278905759373861	0.017587949889533834	-3.570004348892469	3.488946392335681e-4	1	7.725400156817717e-4
ENSMUSG00000074129	Rpl13a	0.11622267138602253	0.030201314242349196	3.8482653586992446	1.2271017210515854e-4	1	0.0025422942639775443	-0.017586831182571875	0.024809128012312793	-0.7088855027005994	0.47814998860675734	1	0.5576407694480541
ENSMUSG00000025224	Gbf1	-0.10994929298798096	0.0286563219847473	-3.836825013569533	1.2315183536678885e-4	1	0.00254907115232225	0.31375364545631246	0.02354803991272668	13.323981385250772	2.5589756397697915e-40	5.3907380827390425e-36	4.8009921551869844e-39
ENSMUSG00000055022	Cntn1	0.37608304806603027	0.09876703333211537	3.8077791280963993	1.237707180136599e-4	1	0.002559500229109616	-0.45519369488660283	0.08105881402718428	-5.615597765024626	2.655031967503987e-8	4.1537975131599874e-4	8.941594719075406e-8
ENSMUSG00000022003	Slc25a30	-0.1826291373359799	0.04761384994873693	-3.835630547258962	1.2449128753174577e-4	1	0.0025720108067491874	0.0066212482807155165	0.03915933020420049	0.16908481953568444	0.8657106540116541	1	0.897620119404162
ENSMUSG00000027002	Nckap1	-0.07704432611856404	0.019987140208840307	-3.854694834455975	1.2517713317245882e-4	1	0.0025837814380523017	0.31475061653255915	0.01630644824337875	19.302217860984165	1.2324726540048257e-82	2.705647217336794e-78	9.171822416140928e-81
ENSMUSG00000037568	Vash2	0.557074804943947	0.14691582204568998	3.7917958541640253	1.2572206496874063e-4	1	0.00259262434441098	-0.30054479894591496	0.12073046714356755	-2.4893865323035635	0.01264483106126071	1	0.022175294447045402
ENSMUSG00000050382	Kif7	0.25199861056432626	0.0660421073262274	3.8157263716545535	1.2585336926339334e-4	1	0.0025927003813255717	-0.32036775142200236	0.054146621796586525	-5.916671082926151	3.258023892970714e-9	5.249653898743712e-5	1.180881082301537e-8
ENSMUSG00000005732	Ranbp1	0.10943170832582973	0.028531020470790182	3.8355343243984206	1.2607352859817246e-4	1	0.0025927003813255717	0.08195186277763276	0.023491487416558512	3.4885770034241053	4.8024644700146827e-4	1	0.0010435511418193037
ENSMUSG00000020541	Tom1l1	-0.0967718892270672	0.02514847335620425	-3.848022416962861	1.2607531403506668e-4	1	0.0025927003813255717	0.020147464500566196	0.020628441841980958	0.9766837774224942	0.3279849985746995	1	0.4067774484859059
ENSMUSG00000035439	Haus8	0.22670321543324856	0.05946480528420027	3.8123931348932434	1.2750820327098303e-4	1	0.0026189425012668245	-0.2800367007036315	0.0489398847513739	-5.722054764253812	9.98426012996876e-9	1.584002869619544e-4	3.478311760637778e-8
ENSMUSG00000037572	Wdhd1	0.28894421847900614	0.07619812194402206	3.792012337144939	1.2758679031833346e-4	1	0.0026189425012668245	-0.0936414192229856	0.06231504488446382	-1.5027096489556084	0.132284307250977	1	0.18535630482629026
ENSMUSG00000078763	Slfn1	0.8102981737100997	0.21399916194049906	3.7864548924513888	1.279309625069887e-4	1	0.0026235869555235073	0.06176103615988804	0.17611095880981972	0.35069388399947954	0.728657558983512	1	0.784314983791705
ENSMUSG00000013846	St3gal1	0.22078441273062616	0.05814737134831672	3.7969801146826483	1.2874516221147506e-4	1	0.0026378532268577642	-0.3388414796882233	0.04757082299289675	-7.122884540778681	1.1437051981237979e-12	1.997138016963776e-8	5.3128568608460595e-12
ENSMUSG00000032366	Tpm1	0.169411862526979	0.04456308198863006	3.8016190749599232	1.2896727370539707e-4	1	0.002639973143715538	-0.10344043020158424	0.03628999687072217	-2.850384103643649	0.004427078334963016	1	0.008408614599339484
ENSMUSG00000005583	Mef2c	0.1977054966944645	0.05168311691956159	3.825340042903542	1.299290371307559e-4	1	0.0026572159974232075	-0.16341803718511855	0.04255492303562485	-3.8401676122951307	1.2514534882318812e-4	1	2.934565451222214e-4
ENSMUSG00000056708	Ier5	0.22101881668080064	0.05810423572374101	3.803833127272231	1.3011307526148035e-4	1	0.0026585363063757568	-0.1658496526481109	0.04746932612218937	-3.4938278293903373	4.7320262015807684e-4	1	0.0010294516524381471
ENSMUSG00000020198	Ap3d1	-0.05371329048947817	0.014038893333649223	-3.8260345180296427	1.302894505423252e-4	1	0.002659697765153466	0.054947390091503394	0.011558774076955464	4.753738564806029	2.0219542892258524e-6	0.029192976027842855	5.757679151467167e-6
ENSMUSG00000059291	Rpl11	0.13425931225870646	0.03521092206085072	3.8130018869339053	1.3115549180834287e-4	1	0.0026749228673028755	-0.1338606342678448	0.028976045290707197	-4.619699925399232	3.990742481235289e-6	0.05662065432376628	1.1011658103914487e-5
ENSMUSG00000042385	Gzmk	1.5056985915081518	0.3969772202994907	3.7929093018793645	1.3143119262521664e-4	1	0.0026780910870912965	-0.23090210252684443	0.3261708569048061	-0.7079176377619595	0.5020276076053725	1	0.5806537216356764
ENSMUSG00000047959	Kcna3	0.7619813875457279	0.19905289670355616	3.8280346589506062	1.3167458594362462e-4	1	0.0026805958022246947	-1.0327613074684407	0.16414305206866583	-6.291836873097782	9.175355310002147e-10	1.5033819675438518e-5	3.4798164479778037e-9
ENSMUSG00000022436	Sh3bp1	0.19072446017620165	0.05006195827349021	3.809768270235601	1.3199216686513008e-4	1	0.0026836079049315396	-0.47855301075309203	0.041158759345962644	-11.62700281440904	3.7856435854127974e-31	7.751105241132703e-27	4.740256354474966e-30
ENSMUSG00000039396	Neil3	0.6857748776781681	0.1798104667074515	3.8138763011716774	1.322124175980506e-4	1	0.0026836079049315396	-0.13650364163342774	0.14825696279623432	-0.9207233107900609	0.35772731861612894	1	0.4376637469911192
ENSMUSG00000048264	Dip2c	-0.09730927390500234	0.025356467635960275	-3.8376510207202266	1.3227307767630527e-4	1	0.0026836079049315396	-0.1635091898069062	0.02084673869924934	-7.843394219393844	3.998560084016409e-15	7.270181944758635e-11	2.1860432537948184e-14
ENSMUSG00000056035	Cyp3a11	-1.1357739821379784	0.2825121003484022	-4.020266674373624	1.323049692917127e-4	1	0.0026836079049315396	-0.21291657817186224	0.23183166680760642	-0.9184102461229271	0.3779318322214491	1	0.458400719474487
ENSMUSG00000016763	Scube1	0.4664598589820168	0.12140690470950274	3.842119689140762	1.3279338077902e-4	1	0.0026910614897212876	-0.38667305291510723	0.09990742741971918	-3.8703133781101426	1.2102644225202667e-4	1	2.84427478511813e-4
ENSMUSG00000043458	Pcdhb12	0.5345130160669439	0.1387794524084055	3.851528499290792	1.3295541056169332e-4	1	0.0026918933943660033	-0.28708303709937905	0.11431733360806823	-2.5112817806233143	0.011679333985946984	1	0.020598990212532208
ENSMUSG00000057729	Prtn3	1.2850399022068446	0.33458287807099757	3.8407222438147675	1.341085125502367e-4	1	0.0027112605108507797	0.15354700040544822	0.2743615025551476	0.5596521340474316	0.5861344135424912	1	0.6592780326662852
ENSMUSG00000024798	Htr7	0.9326698269908754	0.24910773260154961	3.744042054618555	1.3415567041691196e-4	1	0.0027112605108507797	0.014832450315575696	0.2042229550600002	0.07262871263036008	0.9429574364041337	1	0.9583331468634501
ENSMUSG00000030741	Spns1	-0.09046090239813612	0.02371763761191241	-3.8140772651278416	1.343564700492971e-4	1	0.0027113944396129387	0.12782638015839073	0.019514522971030953	6.550320515041402	5.888877987311985e-11	9.943959369375018e-7	2.441919942148322e-10
ENSMUSG00000037408	Cnnm4	-0.15994218543052385	0.04189827577500002	-3.817393018496446	1.3440600723082428e-4	1	0.0027113944396129387	-0.6964298598257891	0.034480205472977116	-20.197961417938657	1.8590972713912154e-90	4.0937321916034564e-86	1.7830505769709453e-88
ENSMUSG00000052373	Mpp3	0.21288224882820292	0.05513207719087975	3.861313770042734	1.3465390097127218e-4	1	0.0027139347377824067	-0.342212428666844	0.04487645485374044	-7.625656478038854	2.5408787613601603e-14	4.5616396402698955e-10	1.3151219660159322e-13
ENSMUSG00000025290	Rps24	0.1202190514717374	0.031549747100080947	3.810460067726786	1.3623355159759535e-4	1	0.002740880336212927	-0.13997256001658373	0.025957335667314597	-5.392408597344479	6.617660395195438e-8	0.001019715290295665	2.151827582251844e-7
ENSMUSG00000038582	Pptc7	-0.09160241509002909	0.023908778176836114	-3.831329832604226	1.3623718717592454e-4	1	0.002740880336212927	-0.0013460106168579969	0.01961173259833269	-0.06863292725969705	0.9452836689985078	1	0.9599497504921739
ENSMUSG00000031673	Cdh11	0.36507769502870513	0.09708548615977464	3.760373558081512	1.377349003057963e-4	1	0.002768508822677754	-0.38209454791127284	0.07942005955342296	-4.811058441151783	1.6239248275847898e-6	0.023551781774462207	4.6630470174976326e-6
ENSMUSG00000024679	Ms4a6d	0.846457060988996	0.21561999612271296	3.925689065068265	1.389579615675614e-4	1	0.0027905718437182393	-0.16330984096358991	0.17731038159841375	-0.9210393632419486	0.35901935268366647	1	0.4389548665621333
ENSMUSG00000036545	Adamts2	0.41176771615289226	0.1102115366276592	3.736158017141312	1.393160231507012e-4	1	0.0027952397034501824	-0.052078212837224344	0.08968269266054775	-0.5806941260599999	0.5628912242287463	1	0.637204549771766
ENSMUSG00000090733	Rps27	0.1185236347630233	0.031114630232953782	3.8092573774987004	1.4011497452756815e-4	1	0.002808737205597224	-0.12262476783144649	0.02555452851177766	-4.798553327835055	1.5296897414927499e-6	0.022215684115699207	4.4038202145109565e-6
ENSMUSG00000022014	Epsti1	0.43341405363101154	0.11328943414630753	3.825723527502833	1.4082617262126587e-4	1	0.0028204528955857668	-0.6669945753898687	0.09319377130511541	-7.157072474362429	9.834414557348011e-13	1.7198424177890202e-8	4.59331566573364e-12
ENSMUSG00000058997	Vwa8	-0.14964294883680676	0.03896498974444125	-3.8404462523477205	1.4117558305647233e-4	1	0.0028245782678101828	0.40086060092837217	0.03156606765766808	12.6990984520365	9.560492128166635e-37	1.9959439415973484e-32	1.5471309843188059e-35
ENSMUSG00000053175	Bcl3	0.4244169101449963	0.11153916335618645	3.8050931831869104	1.4128603712519586e-4	1	0.0028245782678101828	0.8579502555850106	0.09165017881914807	9.361141098022198	2.7816817083781846e-20	5.35279011143214e-16	2.0570023161556328e-19
ENSMUSG00000091477	Gm5799	0.7158105042697285	0.18360260633564346	3.8986946784467595	1.4404757150011667e-4	1	0.0028772015381051132	0.09066930252868856	0.15029088181447897	0.6032921055091814	0.5497342930374576	1	0.6251092474640468
ENSMUSG00000041836	Ptpre	0.2977742968850907	0.07857129328125914	3.789861213295263	1.4455080867265948e-4	1	0.0028846637163904448	-0.30955999390733613	0.06470480310366893	-4.7841887937030645	1.7598835048480915e-6	0.02548839280071491	5.040438649295261e-6
ENSMUSG00000051599	Pcdhb2	0.8595540961171808	0.22818055164726167	3.7669910512178224	1.4484099451846137e-4	1	0.00288786466758986	-0.3038120215532915	0.1874379958797133	-1.6208667838524065	0.10681487748198237	1	0.1533676091405814
ENSMUSG00000076498	Trbc2	0.8313062675908137	0.21789407273910644	3.815185319823596	1.450048776674996e-4	1	0.0028885438970273356	-0.2410615998925981	0.17931399352187247	-1.344354643817543	0.19113398249550995	1	0.25561499245748237
ENSMUSG00000053063	Clec12a	0.7576803168050751	0.1987429304831537	3.812363614459732	1.4526270836412363e-4	1	0.0028910917028713012	0.17696616148038533	0.16356169664895243	1.0819535692406181	0.2908263729192352	1	0.36678442576806114
ENSMUSG00000047123	Ticam1	-0.08796314048818575	0.023101800808085573	-3.807631327917903	1.4542692627474821e-4	1	0.0028917734910986793	0.18327017667879064	0.01894124878324392	9.675717729916402	3.977253562979525e-22	7.761212602798245e-18	3.232208510951695e-21
ENSMUSG00000022347	A1bg	-1.8475305802518756	0.46211993891031317	-3.9979460410394427	1.4659535350630278e-4	1	0.0029124046525613777	-2.747446743920879	0.38355391994418087	-7.163130399816326	1.9626223310892778e-11	3.349215008003853e-7	8.419184401208312e-11
ENSMUSG00000031379	Pir	0.26810756475093317	0.07049201499593151	3.803374960503075	1.4768453404850768e-4	1	0.0029314260188343837	-0.11135465373735846	0.05810469729701842	-1.9164483925996205	0.055097881007640674	1	0.08474927072452734
ENSMUSG00000040018	Cox15	-0.09746757454873173	0.025642513381344278	-3.8010148654009246	1.4821840861496615e-4	1	0.0029394009002599035	0.23498275017963768	0.0210802302345219	11.147067539842128	9.413978312459956e-29	1.9095313608993773e-24	1.0643822735291995e-27
ENSMUSG00000005220	Corin	-0.5368854134966583	0.14118359452447998	-3.8027464543946508	1.4867150141934567e-4	1	0.002945760977811096	-0.013436634736641122	0.11615150132664444	-0.11568197210688004	0.9078950573952131	1	0.9307514840320612
ENSMUSG00000057092	Fxyd3	0.4478840801274639	0.11856340891976334	3.7775911152366173	1.492853853038523e-4	1	0.0029515661323824545	-0.027325230867729648	0.09746365183089528	-0.2803632980543393	0.7810786319086493	1	0.8280423383009842
ENSMUSG00000035184	Fam124a	0.34197021975722985	0.08995664953687114	3.801500183897625	1.4934407652229933e-4	1	0.0029515661323824545	-0.3128924318369028	0.07400948937604584	-4.227733963236538	2.6915838037637707e-5	0.3626909175571681	6.823565138150582e-5
ENSMUSG00000015452	Ager	0.3357299195563977	0.08923411310074793	3.762349485979076	1.4936243157892426e-4	1	0.0029515661323824545	-0.24351994694901077	0.07320063096949543	-3.326746555647748	8.554913983188971e-4	1	0.0017990302527165468
ENSMUSG00000003283	Hck	0.6375823467397506	0.16745789640071335	3.807418822544307	1.49780003256941e-4	1	0.002957191528367519	-0.16804747842640488	0.13781019951312032	-1.2194124892069822	0.22602580198695316	1	0.29530269038880247
ENSMUSG00000000290	Itgb2	0.5609949930397056	0.14843860848667823	3.779306467225827	1.5027331801498886e-4	1	0.00296086858696306	-0.24391276073897725	0.1221407233540946	-1.9969814656480862	0.047832915840632456	1	0.07467666153958273
ENSMUSG00000008540	Mgst1	0.24880292323569972	0.06568353846836263	3.787903773721616	1.5038664950482996e-4	1	0.00296086858696306	-0.7219494968211831	0.05404886628048204	-13.357347646751498	3.5535451298537388e-40	7.483766043471974e-36	6.633383614461035e-39
ENSMUSG00000009292	Trpm2	0.4389500401904287	0.11589250521602094	3.787561925356916	1.5046116274779732e-4	1	0.00296086858696306	-0.023779609396500305	0.095410485808388	-0.2492347585804843	0.8046815966072779	1	0.8475062585285669
ENSMUSG00000034563	Ccpg1	-0.07334858887050841	0.019308071814197046	-3.79885622843892	1.5049851116153074e-4	1	0.00296086858696306	0.05844263214454648	0.01584758307701902	3.6877946536399997	2.2605084300716716e-4	1	5.144055336216483e-4
ENSMUSG00000034586	Hid1	0.2365893044209735	0.06280254832537548	3.7671927450335514	1.5099463788898306e-4	1	0.002968005024441486	-0.48504550574257044	0.05154462432371759	-9.410205469659093	5.69418807994312e-21	1.1017684515881943e-16	4.364498069817925e-20
ENSMUSG00000025980	Hspd1	-0.13109573387189735	0.034603667809355795	-3.788492439418604	0.00015172233297909948	1	0.0029796766382329592	0.5096143730253581	0.028478267081071408	17.89485194357498	7.242307215068815e-71	1.5825889726368373e-66	4.0287144460624045e-69
ENSMUSG00000079105	C7	0.6324105770678954	0.16644606171054882	3.7994925837756557	1.5189502200975668e-4	1	0.0029804375085882677	0.4240424619236438	0.13677294355405825	3.1003387870792216	0.0021268562069324927	1	0.004238663453690542
ENSMUSG00000037016	Frem2	-0.2242622504449498	0.05942493980460871	-3.773874255192045	1.5221415541662316e-4	1	0.0029822438476293303	-0.5202459162364932	0.04884753052878586	-10.650403625417914	1.5403210798355886e-26	3.090500214582125e-22	1.566438955549437e-25
ENSMUSG00000043931	Gimap7	0.906860785913538	0.24088005718593	3.764781512043366	1.5225513509086868e-4	1	0.0029822438476293303	-0.307324521455789	0.19803506616401378	-1.5518692088665804	0.13278209839169458	1	0.18591331936279865
ENSMUSG00000031362	Xlr4c	0.8441241674513775	0.22647383698536672	3.727248050757931	1.53332305897737e-4	1	0.003000701089296874	-0.08726610831489931	0.18610089645921388	-0.4689182587254472	0.6457970640260664	1	0.7127085840513839
ENSMUSG00000029017	Pmpcb	-0.12374383351031214	0.03248715537862137	-3.8090079623205026	1.536404932389911e-4	1	0.0030040901714066706	0.445210590761161	0.026438452480589694	16.839510220502543	3.2291287972943477e-63	7.022709308355747e-59	1.425621921995963e-61
ENSMUSG00000000804	Usp32	-0.08616802901397548	0.02266843504989429	-3.8012341312629476	1.545317192589277e-4	1	0.0030188632881741877	0.08697431068465755	0.018561365792493525	4.685771061083833	2.8372404591745985e-6	0.040643469577676124	7.964102113926325e-6
ENSMUSG00000021339	Mrs2	-0.15239529626541037	0.039959002466262654	-3.8137913075802525	1.547673597070129e-4	1	0.0030208144919655643	0.43556754741001796	0.03268354554869787	13.326814459619458	1.936450959978211e-40	4.0802958177700886e-36	3.6484310169750355e-39
ENSMUSG00000050989	Selenon	0.20472969975069405	0.05440345791249926	3.7631743938036917	1.551938383719957e-4	1	0.003026483871704887	-0.18426262480822694	0.04470646614395789	-4.121610153996262	3.731894597316765e-5	0.49757350666024425	9.310279928791942e-5
ENSMUSG00000001323	Srr	-0.12018487727947769	0.03173362101584096	-3.7873042354505704	1.5546375816748325e-4	1	0.0030290928922807967	0.26230064228779204	0.02611859372123546	10.04267860235259	1.2041017713445467e-23	2.375090743977118e-19	1.060248061503265e-22
ENSMUSG00000030795	Fus	0.10105240736825712	0.02667732544848359	3.7879512158517827	1.556714171243594e-4	1	0.0030297929475205463	0.011156800707164575	0.02195231562058693	0.5082288766248287	0.6110613987643801	1	0.681882005210944
ENSMUSG00000001525	Tubb5	0.21729603797352676	0.05752149604304981	3.7776492776004935	1.5577201617740798e-4	1	0.0030297929475205463	-0.2647647424577777	0.04732547622400523	-5.594549988352346	2.2024075552256247e-8	3.4580001024597535e-4	7.480654939906178e-8
ENSMUSG00000046402	Rbp1	-0.46390200866143644	0.12500709399840612	-3.711005462356811	1.5606718148734243e-4	1	0.003032882843034809	0.30656512238181893	0.10164988052835058	3.015892599070164	0.0026932656606993084	1	0.005279056925318913
ENSMUSG00000015597	Zfp318	-0.09032617969137624	0.023882115599702516	-3.78216826370698	1.5670544967064554e-4	1	0.0030426291104899946	0.07862738620390644	0.01963446652900624	4.004559333850462	6.2631906201583e-5	0.8202900755221326	1.5222529163205062e-4
ENSMUSG00000025794	Rpl14	0.11585391101202659	0.030713229899650526	3.772117468288311	1.5835699769143748e-4	1	0.0030720153056950092	-0.16675012736011788	0.02527851377387595	-6.596516268786561	4.186741178687518e-11	7.095688949639606e-7	1.7563947580500748e-10
ENSMUSG00000040029	Ipo8	-0.08664875735609272	0.022895979020413154	-3.7844530377513053	1.60014825398773e-4	1	0.00309708153285759	0.16354745375222396	0.018850653115769205	8.67595688848632	4.574406892492862e-18	8.612235856496312e-14	2.9718285478790855e-17
ENSMUSG00000060036	Rpl3	0.11057719151552207	0.02923669877860746	3.7821367026714925	1.6007550405605644e-4	1	0.00309708153285759	-0.11844857555217153	0.023990259007170413	-4.937361264702003	8.002096781064792e-7	0.011799891913358142	2.372164341533076e-6
ENSMUSG00000028066	Pmf1	0.14777230954632117	0.03900336092609701	3.7887070764572814	1.6010076674092768e-4	1	0.00309708153285759	0.07382048233792815	0.032003022447619656	2.306672204437954	0.021087405530056957	1	0.035479460147394885
ENSMUSG00000036894	Rap2b	0.27977529503629134	0.07435030821633608	3.762933896954845	1.6020587139090763e-4	1	0.00309708153285759	-0.05422454504999368	0.06122160340739441	-0.8857093253366897	0.37708376234928126	1	0.4576079483094951
ENSMUSG00000027519	Rab22a	-0.07446987968959565	0.019692542058227982	-3.781628571334216	1.6066683606623933e-4	1	0.00310329667474817	-0.01091557332822303	0.016201427759262765	-0.6737414436812411	0.5010832789736206	1	0.5796988797792979
ENSMUSG00000089774	Slc5a3	-0.23003972189049723	0.06077142061922465	-3.7853273717568094	1.6107357028491184e-4	1	0.0031084544773717026	-0.620670176872433	0.05001161170148042	-12.410521392056241	7.750409348351592e-35	1.6086749643438565e-30	1.1527697754690591e-33
ENSMUSG00000020101	Vsir	0.3323523496237651	0.08876676745679006	3.744107836139778	1.6169155874275697e-4	1	0.0031176766668848228	-0.19898673462106234	0.07295503003545853	-2.727525909102474	0.00666587138030438	1	0.01228342062800437
ENSMUSG00000042763	Maneal	0.46110125451071476	0.12177101506692062	3.786625694606483	1.6274312296231887e-4	1	0.003135235696133816	-0.4446721872776688	0.10042917687447853	-4.427719126220088	9.413708953843051e-6	0.13076583107783382	2.5052558059079264e-5
ENSMUSG00000003549	Ercc1	0.16686325964699986	0.04435851244487573	3.7616964692934785	1.630190302734979e-4	1	0.003137834292920071	-0.18225691285207177	0.03651310465016711	-4.9915479551322575	5.540073920372654e-7	0.008230333816105615	1.66674127639551e-6
ENSMUSG00000025997	Ikzf2	0.22805288811712346	0.06037735962927403	3.7771258882038254	1.6370269942133156e-4	1	0.0031482703239620125	-0.44364875459180597	0.049724097223701934	-8.922208332830875	7.728645995649277e-19	1.4668970099742328e-14	5.255809964828608e-18
ENSMUSG00000021886	Gpr65	0.5294255770781889	0.14169068216865682	3.7364883066058265	1.6504406862150015e-4	1	0.0031713260543151985	-0.037887556672516996	0.11642390562859227	-0.32542763849018547	0.7460948964758233	1	0.7993675265039638
ENSMUSG00000028989	Angptl7	-0.656664658583438	0.1701654250022141	-3.8589781594874157	1.6542320566117585e-4	1	0.0031758686360369493	0.7483744368468424	0.1394334984292022	5.367249945513143	1.687814420803552e-7	0.0025605832578010686	5.30370832895069e-7
ENSMUSG00000047371	Zfp768	-0.08359086500574305	0.022191805951101533	-3.7667445898693908	1.6566874499151466e-4	1	0.0031778407282812005	-0.010078891329890812	0.018268878157667444	-0.5516973315441761	0.5804906603765478	1	0.6538674538847102
ENSMUSG00000073492	Gm10521	0.9685951891892232	0.25970895518857245	3.7295409720698096	1.6630889879187368e-4	1	0.0031873723574659617	-0.131255000771387	0.21417792327505628	-0.612831606378141	0.539947287242973	1	0.6158055914117577
ENSMUSG00000055639	Dach1	-0.11571411432793403	0.03074741986831629	-3.763376401125994	1.6776633754025082e-4	1	0.0032089036996261065	-0.1695110473758145	0.025310011546954773	-6.697391151376601	1.9617162763004915e-11	3.347864997134419e-7	8.41692033628273e-11
ENSMUSG00000017969	Ptgis	0.26736100732967605	0.07119364517624252	3.7554055094076713	1.6784348150724565e-4	1	0.0032089036996261065	-0.22737396070393537	0.05860465454194675	-3.8797935502066756	9.844831111118312e-5	1	2.3408563480817863e-4
ENSMUSG00000026577	Blzf1	-0.07766544139180523	0.020596580758311077	-3.770792943895111	1.6786499062355795e-4	1	0.0032089036996261065	9.304680447948903e-4	0.01697277400102024	0.05482121218010442	0.9563012581455781	1	0.9684002773857578
ENSMUSG00000037138	Aff3	0.6204088543391767	0.16286844139792603	3.8092637776484364	1.6917120729358597e-4	1	0.0032310974536391254	-0.2336716662745339	0.13403124794741808	-1.743411852482384	0.08165168677191166	1	0.12089643880501771
ENSMUSG00000037649	H2-DMa	0.5334753960624388	0.14081828790282241	3.788395697798754	1.7011625302846506e-4	1	0.0032463608457430327	-0.1703659892728781	0.11587853475505588	-1.4702118009430982	0.15074022362340297	1	0.20782704726713797
ENSMUSG00000025225	Nfkb2	0.20319951254662702	0.05421960580746535	3.747712834139584	1.7105853496053271e-4	1	0.0032615453825251186	-0.12538072435562433	0.0444889934881021	-2.818241423896351	0.004915986094587219	1	0.009270752317201475
ENSMUSG00000032374	Plod2	-0.3002241619674249	0.07976049040248061	-3.7640711642124973	1.712976290105044e-4	1	0.0032633078280074773	-0.06295924389190671	0.06564002042995357	-0.9591594195052454	0.3380569597941816	1	0.4172354995124257
ENSMUSG00000020642	Rnf144a	-0.16733584511443425	0.044868722044268596	-3.729454227587239	1.7280932559691077e-4	1	0.003289290251374561	-0.09785608188729136	0.03672893180102063	-2.6642779163147923	0.007640908846761716	1	0.01392447688364414
ENSMUSG00000028681	Ptch2	0.34546033318327257	0.09307469305252314	3.7116462257718674	1.7354969434602493e-4	1	0.003300559187088377	0.05253682338064461	0.07643873720063522	0.6873062704155717	0.49345570384568016	1	0.5724762618481124
ENSMUSG00000076536	Igkv4-86	2.209203307117132	0.48221256230137066	4.5813889554715415	1.7462848587605466e-4	1	0.0033182394869582343	0.4836756382814853	0.3946194726471983	1.2256760545466185	0.2814415248641307	1	0.3566464701720925
ENSMUSG00000056771	Gm10010	-0.6344143520690798	0.17036601233261273	-3.7238316691388302	1.7516354966226033e-4	1	0.0033255666753711217	0.5395475306067508	0.14048991897648258	3.840471505269134	1.2035827463070212e-4	1	2.829767507193315e-4
ENSMUSG00000031779	Ccl22	0.9384400889052392	0.2498683651725374	3.7557378992624133	1.7534599320594862e-4	1	0.0033261924082059356	-0.2624702019091965	0.20559236488858784	-1.276653449905259	0.21064452962095181	1	0.2779488482829745
ENSMUSG00000046387	Pcdhb17	0.3056092462513861	0.08223228260313804	3.7164144856137535	1.7597261083550063e-4	1	0.003335235573850702	-0.19293333963367393	0.06723271644995744	-2.869634752557972	0.004091553629684171	1	0.007817375907101364
ENSMUSG00000028343	Erp44	-0.09111716973166832	0.02426229486556591	-3.7555050021663745	1.7616099770228238e-4	1	0.0033359645615944553	0.12427899862977275	0.019939867563952753	6.23268927093799	4.688277509106422e-10	7.740346167534703e-6	1.8167687714233196e-9
ENSMUSG00000053007	Creb5	0.4443610239972018	0.11959576864258442	3.7155246296814077	1.7664320401598201e-4	1	0.0033422516433330067	-0.3748245637454301	0.09790060717500247	-3.8286234841772893	1.3483586304209412e-4	1	3.151505029989114e-4
ENSMUSG00000037331	Larp1	-0.060702675469232255	0.016170274734205046	-3.7539668599957454	1.7731652281391486e-4	1	0.003351589903377422	0.14396977041204154	0.013305653068651445	10.820195722015256	2.8724963964812173e-27	5.787505739630357e-23	3.0378287698718426e-26
ENSMUSG00000035042	Ccl5	0.9141886994675591	0.23810228349854126	3.839478924918248	1.7745975415401876e-4	1	0.003351589903377422	-0.3591737021177071	0.19586250539987332	-1.8338053083943622	0.08068866752367009	1	0.11957399540920301
ENSMUSG00000035356	Nfkbiz	0.2772399319269342	0.07422273908198528	3.7352425328941217	1.7758862505424386e-4	1	0.003351589903377422	-0.3003424833435811	0.06097001001584439	-4.926069116038041	8.791444681421885e-7	0.012933973415307876	2.5944089602959995e-6
ENSMUSG00000094094	Igkv5-45	2.2739349673819955	0.4910370194587297	4.630882962528069	1.7795967527140102e-4	1	0.003355746385138936	-0.581347851185677	0.40372336167798034	-1.439965843862596	0.24911093925955366	1	0.321219721225332
ENSMUSG00000029209	Gnpda2	0.12612424624574545	0.03351818246961648	3.762860541739529	1.7825483117477108e-4	1	0.0033584659174173	0.12743877986690907	0.027603825577193042	4.6167071846810295	3.8002314442514898e-6	0.053993688359925164	1.0512052444808542e-5
ENSMUSG00000025899	Alkbh8	-0.11865315016709513	0.03154737577234579	-3.7611099897287072	1.788034603358734e-4	1	0.003365952450028358	0.24178590915386772	0.02600012817280252	9.299412200851698	1.3828320473389386e-20	2.6674830193168124e-16	1.0388047226650479e-19
ENSMUSG00000016520	Lnx2	-0.10735200769692788	0.02859295618827694	-3.7544913855721576	1.80741716454452e-4	1	0.0033995637640135347	0.047325986718996356	0.023493171880555667	2.014457092452728	0.044237543146264664	1	0.06957867905192161
ENSMUSG00000034161	Scx	0.32087177951981494	0.08613115880248795	3.72538560935449	1.8156562033047597e-4	1	0.003412176197612686	-0.42721146557671297	0.07086946127890867	-6.02814608531326	1.6898565830069912e-9	2.745341004753158e-5	6.260572565515911e-9
ENSMUSG00000020630	Rnaseh1	0.10755100706619072	0.028762242009877818	3.7393123606029905	1.8265865710641576e-4	1	0.00342982091078047	-0.011690333324609243	0.02369246775239309	-0.49341982636774695	0.6214652106500167	1	0.6915494299946751
ENSMUSG00000034993	Vat1	0.16742738107145794	0.04469066472719799	3.7463613954608386	1.8353319631101022e-4	1	0.0034408317478041733	-0.007718377737495448	0.03677976402823606	-0.20985392216138202	0.8337857959384151	1	0.8716568376050289
ENSMUSG00000040325	Dcaf1	-0.07844418325519321	0.02090341164774132	-3.7526976254935573	1.8355432495813912e-4	1	0.0034408317478041733	-0.019517158836212654	0.01714652203525477	-1.13825758926992	0.2556527168206693	1	0.328323248411446
ENSMUSG00000064345	mt-Nd2	-0.1844517137708555	0.049309663640754835	-3.740680835194436	1.8417466259455984e-4	1	0.0034495542233935615	0.23831772880722024	0.04054756745583619	5.877485229336936	4.530008251928075e-9	7.268207444692537e-5	1.6236664564054705e-8
ENSMUSG00000051367	Six1	0.6739651031967838	0.1789471237005087	3.7662807272876435	1.8434449581992773e-4	1	0.003449831267022045	-0.16789184916999123	0.14706042965663152	-1.1416521056139886	0.2564739507967411	1	0.3292638979447431
ENSMUSG00000031963	Bmper	0.5037648606869908	0.13350773296314622	3.7733009879364157	1.8476988519708845e-4	1	0.003454886315563374	-0.15282024188074045	0.10945226621995531	-1.3962272976023433	0.1628262612120415	1	0.22250489088184827
ENSMUSG00000001157	Gmcl1	-0.07481229479714473	0.020008090004214253	-3.739102272200255	1.8524913208977045e-4	1	0.0034609390748358373	-0.05219803183284244	0.016487655244561184	-3.165885691967092	0.0015280069135906486	1	0.003103859944705635
ENSMUSG00000021130	Galnt16	0.5017259981989756	0.13558476404274197	3.7004600165901427	1.870366824287931e-4	1	0.0034873151450906174	-0.15056446338895096	0.11087868450713921	-1.3579207226187509	0.1745475045707054	1	0.23627305780525404
ENSMUSG00000038555	Reep2	0.3744455353632351	0.09976013672396439	3.753458522208358	1.8724174156830258e-4	1	0.0034873151450906174	-0.1859072861906617	0.08179450753154081	-2.272857821400464	0.02295140730678803	1	0.03836922962941272
ENSMUSG00000022575	Gsdmd	0.30429438273183923	0.08178660004671942	3.720589712226886	1.872713178890241e-4	1	0.0034873151450906174	-0.20322367495076665	0.06734284691050033	-3.0177470106194653	0.00260712116021166	1	0.005121936512084552
ENSMUSG00000097296	Gm26532	0.22455996587331262	0.06039018449540104	3.718484514489499	1.8729858775932832e-4	1	0.0034873151450906174	-0.19168892858991368	0.049742268490484146	-3.8536426746718315	1.1673806456634849e-4	1	2.750173292393669e-4
ENSMUSG00000030970	Ctbp2	-0.08949149103755717	0.024001524387599497	-3.7285753018168037	1.8751301916572686e-4	1	0.0034873151450906174	-0.507220073529249	0.01973530796726497	-25.701148133618027	1.5745250186262366e-145	3.4949731838446575e-141	6.369955670809525e-143
ENSMUSG00000021994	Wnt5a	-0.17003484366263225	0.04579308764099618	-3.713111572551156	1.8760128662412788e-4	1	0.0034873151450906174	-0.3996293337170367	0.03745359383423907	-10.669986316552253	1.4463852052831362e-26	2.9024611914416695e-22	1.4729298490963416e-25
ENSMUSG00000033597	Caskin1	0.37379063295210807	0.09983582712245792	3.7440530491485697	1.8826228851931732e-4	1	0.0034966812870144658	-0.5410909532571463	0.08227022198215493	-6.576996393354976	4.2585899937828075e-11	7.216606603464346e-7	1.785862909002285e-10
ENSMUSG00000029735	Tpk1	-0.14914873129056927	0.039842989942720036	-3.743412116033254	1.884783111990964e-4	1	0.00349777389699007	0.4029677102266794	0.03279313918289589	12.288171253725462	1.6298840741589897e-34	3.379401639361249e-30	2.3891008256990567e-33
ENSMUSG00000018920	Cxcl16	0.2744712098394501	0.07399201416357956	3.70947071710545	1.8872142506508075e-4	1	0.00349936702426926	0.06939539114291733	0.060644120890989486	1.1443053361703213	0.25444030979338905	1	0.32701157125932534
ENSMUSG00000033777	Tlr13	0.5348543760249033	0.1420530204210391	3.765174259861689	1.8922451407273972e-4	1	0.003505774073798943	-0.011659957818433896	0.116912294746544	-0.09973252037958627	0.9209315745805313	1	0.9410198597534626
ENSMUSG00000066154	Mup3	-2.3310404765851764	0.5205797098329626	-4.4777782010234946	1.8956562815368376e-4	1	0.0035091720399730592	1.6557794242289305	0.4241254215730665	3.9039853307724446	7.452984251123228e-4	1	0.0015801462846283271
ENSMUSG00000085468	Gm15343	0.3660412680652062	0.09808250040522365	3.7319732526487637	1.9300225860125337e-4	1	0.003569819830537397	1.3981907807341194	0.08088800917038885	17.28551357703539	3.755724704889608e-64	8.174710392662721e-60	1.7195191442077916e-62
ENSMUSG00000006179	Prss16	1.4915515554329466	0.38084072620098175	3.9164707259953273	1.9517208281234573e-4	1	0.003604448305102406	-0.12675866653075396	0.31124972111726024	-0.40725712484413407	0.690640756108842	1	0.7514105921848272
ENSMUSG00000032715	Trib3	0.5688910984066711	0.15033990850640377	3.784032490497618	1.9519842738071995e-4	1	0.003604448305102406	-0.2163062172202164	0.12358852782713095	-1.7502127505133325	0.08252125929247392	1	0.12207023936423594
ENSMUSG00000040998	Npnt	-0.20209197019035488	0.05418959961773338	-3.7293497574435093	1.9665141912407288e-4	1	0.003626117842890491	-0.9174321701231731	0.0445921997303817	-20.57382626715554	2.037439107247261e-93	4.4921457436587604e-89	2.2223067438901374e-91
ENSMUSG00000006310	Zbtb32	0.22742556223446442	0.06118623260319085	3.716940111501557	1.9669786689896284e-4	1	0.003626117842890491	-0.08747147784337486	0.0504352100620578	-1.7343335684682575	0.08362592118142347	1	0.12358929145907635
ENSMUSG00000024694	Keg1	-0.26033477955931006	0.07034643564012608	-3.700752954863478	1.9754013732837484e-4	1	0.0036386304600113145	0.335211753968897	0.05784349823674714	5.795150089244461	8.407460850587132e-9	1.3375429467199067e-4	2.9489549142823433e-8
ENSMUSG00000022770	Dlg1	-0.061383794030910196	0.01649323208990195	-3.7217565178442302	1.9901499799586844e-4	1	0.0036627648638594447	-0.07150427412213109	0.013579831948935849	-5.265475625251338	1.4246240485099063e-7	0.0021669956401884185	4.502103352278643e-7
ENSMUSG00000106981	Gm45495	-0.18755289821576	0.05059457127259763	-3.7069767269149674	1.9950571324924642e-4	1	0.0036687616739743655	-0.11117687698934393	0.04157333461600831	-2.6742352523854063	0.007521854120216955	1	0.013730006236993228
ENSMUSG00000026271	Gpr35	0.4470752584658006	0.12189180511273005	3.6678040665024927	1.997674415402791e-4	1	0.0036705411574836917	-0.16365738475462407	0.10018496282159295	-1.633552382966507	0.10445023877289847	1	0.15032160034511116
ENSMUSG00000036931	Nfkbid	0.4464347547793186	0.12129832916883976	3.6804691197181216	2.0023141124698486e-4	1	0.0036760306366804127	-0.25804227680950925	0.09963978349101171	-2.5897514804695123	0.010014085261664847	1	0.017870190966180487
ENSMUSG00000023886	Smoc2	0.41942981431143983	0.11430865046956586	3.6692744826264136	2.0049030882932298e-4	1	0.003677749267733937	-0.2556206606669021	0.09331439612755882	-2.739348602947331	0.0064177124808070625	1	0.011857553799754044
ENSMUSG00000032243	Itga11	0.5401612139083143	0.14765470397960195	3.658272979795726	2.012138790308788e-4	1	0.003685560041923046	0.1676746701534924	0.12117460123048009	1.3837443527836901	0.17226517297410499	1	0.23368117806784183
ENSMUSG00000028803	Nipal3	-0.13515368469681285	0.03623678278888944	-3.729737418583758	2.0137307885148635e-4	1	0.003685560041923046	-0.2654934252113922	0.029700387780468986	-8.93905585252934	3.5024110185279783e-19	6.6727934724995045e-15	2.4349189771247074e-18
ENSMUSG00000032042	Srpr	-0.06162642103106071	0.016543451325114415	-3.7251248134363824	2.0151946792304137e-4	1	0.003685560041923046	0.11195330817139959	0.013562668104329248	8.254519487626755	1.6586005069210309e-16	3.0708988385642885e-12	9.875707754749762e-16
ENSMUSG00000040829	Zmynd15	0.2808446844981406	0.07640211279241384	3.675875891825159	2.0166109555288855e-4	1	0.003685560041923046	0.00550600072275491	0.062373077526557	0.08827527742896098	0.9301451856414156	1	0.9483005968250694
ENSMUSG00000020679	Hnf1b	-0.2447146457124046	0.06594945899982574	-3.7106391685950175	2.0174428704607748e-4	1	0.003685560041923046	0.45656789973637746	0.05420693925263366	8.422683627432349	4.51280726190876e-17	8.40690864820983e-13	2.771583615366598e-16
ENSMUSG00000004730	Adgre1	0.5814469217989223	0.15724637975283448	3.6976808160090013	2.0200678429793906e-4	1	0.0036860919283410523	-0.2885112655841561	0.12930720550212696	-2.2312079552241997	0.026885767909075587	1	0.04432356981142779
ENSMUSG00000020737	Jpt1	0.20575516532193203	0.05548894452392592	3.7080389091418704	2.0210472125190256e-4	1	0.0036860919283410523	-0.22305052232196898	0.045676648596209325	-4.883250614417446	1.0543279097262028e-6	0.015443795221669419	3.0851986216882876e-6
ENSMUSG00000102748	Pcdhgb2	0.3330708602511067	0.08889315692406687	3.746867270510126	2.02887868742985e-4	1	0.003697344772645503	-0.41012822192141	0.07298057081842668	-5.619690519299937	2.1941123131958486e-8	3.4451951541801214e-4	7.453617264262721e-8
ENSMUSG00000025887	Casp12	0.375059597163936	0.10156840135044488	3.692679929753499	2.040057051847496e-4	1	0.0037146734419524247	-0.20875203026105096	0.08357428433073841	-2.497802187990409	0.012705358531381515	1	0.02226564800202962
ENSMUSG00000004591	Pkn2	-0.07331403276498778	0.019691913836509745	-3.7230526892241462	2.04836741833736e-4	1	0.0037265819296654693	0.05688023044695701	0.016199980450918226	3.5111295732293923	4.5529513061950044e-4	1	9.93407722241077e-4
ENSMUSG00000031780	Ccl17	0.7027030424670863	0.19043281314183771	3.690031307491638	2.049946645953231e-4	1	0.0037265819296654693	0.22861891399537182	0.15701921982722228	1.4559931850822785	0.14858799694182304	1	0.20539426725181736
ENSMUSG00000061132	Blnk	0.18227662378033366	0.049333489549650306	3.694784728270366	2.0551114383301109e-4	1	0.003732921193002718	-0.39217424523813516	0.04043315915404713	-9.699322374093558	3.0604874291971826e-22	5.976213802993339e-18	2.4990424142042757e-21
ENSMUSG00000028262	Clca3a2	0.5558328101372162	0.1464629168890325	3.7950412428174047	2.077895235933745e-4	1	0.003771227316049083	-0.13325656800317426	0.12044351096747288	-1.1063822943451198	0.2800805177296061	1	0.3551240298593348
ENSMUSG00000039236	Isg20	0.45332044868345867	0.12416254780320539	3.651024054386839	2.0810388933185955e-4	1	0.0037738546385682205	-0.2555343042936646	0.10208166286640288	-2.503234147234547	0.012972030636456296	1	0.022695443756234394
ENSMUSG00000049916	2610318N02Rik	1.1488608346835063	0.316136871740767	3.6340615011385795	2.0979328536462554e-4	1	0.003801392827889481	-0.42589940224623213	0.25840756182382807	-1.648169268887701	0.10366143512985405	1	0.1493790361142785
ENSMUSG00000059974	Ntm	0.47158288487101685	0.12866870793124013	3.665093809156988	2.116084481386628e-4	1	0.003831163205478752	-0.37494471084030134	0.1054568456864534	-3.5554326359722075	3.680348421352823e-4	1	8.124150071777942e-4
ENSMUSG00000028464	Tpm2	0.2018845128229805	0.055007368192527856	3.6701358282835335	2.127376633127656e-4	1	0.003848476216562884	-0.09624160868724511	0.04499548583477359	-2.1389169802644354	0.03262819526473336	1	0.05293161073458603
ENSMUSG00000031089	Slc6a14	0.5463791589416279	0.14756066268363227	3.7027426483781536	2.1342954473889378e-4	1	0.003857856051978168	-0.3242479064758039	0.12186564369826268	-2.660699903892818	0.007588972144900523	1	0.013840031079106757
ENSMUSG00000001119	Col6a1	0.4332167875146783	0.11994638349025478	3.6117536428255512	2.1397132085744568e-4	1	0.003864509626947259	-0.29116642325326714	0.09722961696347138	-2.9946268672708722	0.002961376783310616	1	0.0057669871175778506
ENSMUSG00000037552	Plekhg2	0.18178515051068295	0.049368153439449884	3.682235162667016	2.1433577792063694e-4	1	0.0038679524691906672	-0.17429283628018663	0.04047739820005834	-4.305929828264886	1.7522075573625248e-5	0.23896606667310114	4.526163264322445e-5
ENSMUSG00000021411	Pxdc1	0.24164676824611236	0.06564972494344877	3.6808496677521334	2.147169531278677e-4	1	0.0038688772948069433	-0.3916893160107209	0.053918940397466426	-7.264410485876792	3.7086230235534107e-13	6.5275473837563585e-9	1.774254373190431e-12
ENSMUSG00000028434	Epb41l4b	-0.15398731631072093	0.041490557707084506	-3.711382175140722	2.1473477412640218e-4	1	0.0038688772948069433	-0.8998994162690355	0.034098082526895584	-26.39149622443493	1.9170436152435024e-152	4.2564119389251484e-148	8.70533418015983e-150
ENSMUSG00000025026	Add3	-0.1388143223603972	0.03769621337986638	-3.6824473843449272	2.1509821133715334e-4	1	0.003872289887105986	-0.03409151184060806	0.030904272781076447	-1.103132634186534	0.2700338695272867	1	0.3443082706350155
ENSMUSG00000025421	Hdhd2	-0.14147380144096958	0.03824609765650535	-3.699038859116285	2.1673291760905116e-4	1	0.0038985643894252197	0.255974891531453	0.031470239668864045	8.133871690361127	4.0645316850874104e-16	7.491744801953114e-12	2.3675365058869104e-15
ENSMUSG00000087006	Gm13889	0.27976022758485936	0.07673208879638649	3.645935253075425	2.1707871736336844e-4	1	0.0039016304846949206	-0.13977332318296087	0.06276186394799961	-2.227042257680045	0.02593474396788897	1	0.042873253196842306
ENSMUSG00000096802	Gm15433	0.7946237947913047	0.2125189320439058	3.7390729717535836	2.1925172066620475e-4	1	0.003937506082763294	-0.22539819348837495	0.1748923240311983	-1.2887826537668234	0.1978692016859994	1	0.26334036764849406
ENSMUSG00000096833	Igkv4-55	1.3674328796602784	0.34297702212209397	3.986951869835454	2.197060299354349e-4	1	0.0039424829613656145	-0.4803213680500299	0.280477579814209	-1.712512523704031	0.09516758504309739	1	0.1385957302282802
ENSMUSG00000020474	Polm	0.10836910023735606	0.029443229335554207	3.6806118989976015	2.2036507574014008e-4	1	0.0039511227238467825	-0.2180079849421833	0.024073596305772833	-9.055896018739215	1.2996690362614346e-19	2.486656767079003e-15	9.27186140617287e-19
ENSMUSG00000030168	Adipor2	-0.07164892236394939	0.019389806019047304	-3.695185103634666	2.210924152377283e-4	1	0.003957441251639085	0.011402224328993812	0.01594833562316665	0.7149476032113891	0.4750973667151023	1	0.5550452329506322
ENSMUSG00000020817	Rabep1	-0.07426915232004022	0.020016418621738252	-3.710411623754829	2.2123323067115686e-4	1	0.003957441251639085	-0.03659768363366729	0.016263941937357976	-2.2502345233785594	0.024442110084436097	1	0.04062304985724437
ENSMUSG00000037708	Spag6	0.7666173671136229	0.20840140612940175	3.6785613943392046	2.2125104116844284e-4	1	0.003957441251639085	0.0422955586296742	0.17114844779378374	0.24712791249287866	0.8046948327685511	1	0.8475062585285669
ENSMUSG00000026627	Tmem206	-0.1498140933356692	0.04030923733084947	-3.716619396840174	2.216157202637698e-4	1	0.0039607802342081465	0.03814376258380839	0.03289876624048	1.1594283598658095	0.24586081974785728	1	0.31767313746063364
ENSMUSG00000039942	Ptger4	0.2555709639791477	0.06958755148942641	3.6726534920255216	2.2224205915036838e-4	1	0.003968786563527164	-0.37625373098959625	0.05725895703400328	-6.571089493756543	5.5390683844346286e-11	9.357148221825418e-7	2.2998658447854995e-10
ENSMUSG00000029838	Ptn	0.33551248182637816	0.09100220688053243	3.6868609380741555	2.2321583228742856e-4	1	0.003982979538273916	-0.29821654175657103	0.07490522439776719	-3.9812515636153734	6.889164608568518e-5	0.8992426563564487	1.666385495219677e-4
ENSMUSG00000002588	Pon1	-1.6271675836313924	0.3954202262131398	-4.115033768541508	2.2386978745543297e-4	1	0.00399144762874266	-0.9506803515923196	0.3190047587390692	-2.9801447331070414	0.005272912196652992	1	0.009895215424451861
ENSMUSG00000094686	Ccl21a	0.47010665785201783	0.1262409763868451	3.7238832533380593	2.244775181582298e-4	1	0.00399907866816555	-0.6084020452130967	0.10362324265621758	-5.8712893904656385	5.384623383346678e-9	8.618628187384693e-5	1.918239751886758e-8
ENSMUSG00000028643	Svbp	0.1990438733540712	0.05359706971986271	3.7137081261050153	2.2522053495061935e-4	1	0.004009105698548985	-0.15333991917887108	0.04381711356509246	-3.4995440526012094	4.613603857506397e-4	1	0.001005556856042461
ENSMUSG00000034040	Galnt17	0.48420160355670117	0.1320121418524376	3.6678565832068606	2.2707220095963065e-4	1	0.00403883576622921	-0.20701359740246056	0.10848309687762345	-1.9082567087477824	0.05701413241147957	1	0.08743083806256594
ENSMUSG00000047945	Marcksl1	0.24797393270186305	0.06792513380511953	3.6506947989725305	2.2794291617888747e-4	1	0.004051084527073822	-0.16830743575368023	0.05554661355421793	-3.0300215437868006	0.0025112353168769974	1	0.004947538253570929
ENSMUSG00000027312	Atrn	-0.08850648523122784	0.02399642673354691	-3.6883193574606725	2.2815389482613323e-4	1	0.004051598015783153	-0.002135569763786109	0.019752264474742164	-0.10811771817438595	0.9139232197813035	1	0.9358325073954786
ENSMUSG00000022504	Ciita	0.6060616140659311	0.1623858125412338	3.732232542864771	2.2892090954849866e-4	1	0.004060700062151649	0.05429544037869464	0.13359239947940577	0.40642611847887855	0.6920921450167846	1	0.7526020095185454
ENSMUSG00000031778	Cx3cl1	0.16832815503216733	0.046101508637566194	3.6512504689489433	2.2903144029483256e-4	1	0.004060700062151649	0.09474954950722453	0.03740648679497531	2.5329710867140807	0.011469466915288837	1	0.02026257311092433
ENSMUSG00000072664	Ugt3a1	-0.2712710685996129	0.0735045092477374	-3.690536422538773	2.2977799206179883e-4	1	0.004070692755865514	0.5474607757360205	0.060478212214642155	9.052198398210534	2.8212688186870165e-19	5.38015963723614e-15	1.9728489152924203e-18
ENSMUSG00000004633	Chn2	-0.13881773165175423	0.03773331079102353	-3.678917347607301	2.3062502006546904e-4	1	0.004079282125789609	0.455620573538377	0.03106514870632423	14.666614920971615	1.7928429251403614e-48	3.837938849847972e-44	4.72101158902937e-47
ENSMUSG00000045636	Mtus1	-0.13031805436793592	0.03540552167483206	-3.680726852856181	2.3078156642132033e-4	1	0.004079282125789609	0.2610710177020622	0.029141911255289046	8.958610003819832	4.351242320957098e-19	8.281719509477643e-15	3.0077506332282194e-18
ENSMUSG00000030413	Pglyrp1	0.662532136559765	0.18199831191073948	3.6403202293695	2.3081282622664675e-4	1	0.004079282125789609	-0.015958118920119977	0.14968786231726872	-0.10660930467626145	0.9160911438630677	1	0.9374099794774629
ENSMUSG00000027398	Il1b	0.6134965399672873	0.1682104735601843	3.647195843294403	2.321059516453307e-4	1	0.0040988805794129	-0.38943344497095067	0.1380913837026677	-2.820114003705413	0.00504541537238147	1	0.009496107838879437
ENSMUSG00000020091	Eif4ebp2	-0.11747306333168357	0.031808416065563845	-3.693144075126119	2.3343813461400984e-4	1	0.004119137139806767	0.14446610796843531	0.026123253323199903	5.530172914570937	3.502866589101462e-8	5.451160985959695e-4	1.1650565691195312e-7
ENSMUSG00000040711	Sh3pxd2b	0.21471468025839574	0.058660479972092935	3.6602953191065577	2.336936160429635e-4	1	0.004120377694589525	-0.3331629276227799	0.048105772020341477	-6.925633112839397	4.778538967897523e-12	8.253492505352602e-8	2.135085754511803e-11
ENSMUSG00000038866	Zcchc2	-0.09356351153269388	0.025473062323449442	-3.6730374363573555	2.3443159418757564e-4	1	0.004130116708050471	-0.09772703867939579	0.020928373052024375	-4.669595598112811	3.0817776397634305e-6	0.044023193584020605	8.607083502243767e-6
ENSMUSG00000062694	Cav3	1.103810084460041	0.3091650118223595	3.570294316144253	2.3544830592451364e-4	1	0.004144747037283507	-0.34445967030179736	0.2518171319423431	-1.3678960904878623	0.17313875978076848	1	0.23467171280902982
ENSMUSG00000091243	Vgll3	0.2750169561826337	0.07532274715061411	3.6511806404606353	2.37710514118314e-4	1	0.00418126217363368	-0.1270624293383817	0.061968761138631256	-2.0504271346352785	0.04064323409315235	1	0.06451827080022352
ENSMUSG00000024791	Cdca5	0.6339564479572077	0.16929164169276276	3.744759290052472	2.3793368574755728e-4	1	0.004181881865378275	0.07147937516780474	0.13945323947297006	0.5125687681257447	0.6104279997855511	1	0.6814485963891379
ENSMUSG00000020396	Nefh	0.6766577837061951	0.18675358346442913	3.6232653272491437	2.4206279380642906e-4	1	0.004251096468024351	-0.24357479529213114	0.15327741236125791	-1.5891108255275883	0.11126473003790598	1	0.1590691022920487
ENSMUSG00000022512	Cldn1	0.2764031133758469	0.07543275715542759	3.6642318774895655	2.429336057435651e-4	1	0.0042630249695584125	0.00417851286228189	0.061967782723553105	0.06743040784471532	0.946308566636391	1	0.9605981713606906
ENSMUSG00000031189	Aff2	0.3322456899283237	0.09105469074326264	3.6488585839594143	2.4313646176693035e-4	1	0.004263222545922748	-0.42658238946097443	0.07510325230707703	-5.679945626279853	1.3850525219607526e-8	2.188382984697989e-4	4.776627970574815e-8
ENSMUSG00000030894	Tpp1	-0.14660933724737074	0.039871324891120725	-3.6770620903049145	2.4389775902667859e-4	1	0.004270879517375045	0.13542002247227275	0.03277923791351112	4.131274278846325	3.6523769324962035e-5	0.48733665410296845	9.122128086763163e-5
ENSMUSG00000022780	Meltf	1.010386031775193	0.26862587185729586	3.7613131780245945	2.4395702964287813e-4	1	0.004270879517375045	1.3209400980720993	0.2212198204635624	5.971165220657406	1.869536596058759e-8	2.943211463175304e-4	6.391006114442072e-8
ENSMUSG00000028224	Nbn	-0.07985220564662497	0.021773436448707023	-3.667413999381198	2.4521527025410785e-4	1	0.0042895322157422595	0.011210828238371145	0.017942024155808423	0.6248363139530069	0.5316834374399261	1	0.608564206094434
ENSMUSG00000028217	Cdh17	1.444391629120368	0.3857041615984009	3.7448173313314763	2.462884468661657e-4	1	0.004304920841491793	-0.4584993858461431	0.3171584765285932	-1.4456475856000255	0.16397511710960047	1	0.22384112458930797
ENSMUSG00000030138	Bms1	-0.05747173972597306	0.0157074554330698	-3.658882877042868	2.4689709710803347e-4	1	0.004310002338578191	-0.06627537672266469	0.012878322120277218	-5.146274188802326	2.6435019074173575e-7	0.003979263421235348	8.170657166543078e-7
ENSMUSG00000032356	Rasgrf1	1.0198558306043468	0.2847601167571656	3.5814560066150256	2.469665624775153e-4	1	0.004310002338578191	-0.22143271163190895	0.2342894611355463	-0.9451245077720368	0.346206048378008	1	0.4257921060390812
ENSMUSG00000064147	Rab44	0.8482819324072353	0.23447585792266476	3.6177794162801065	2.5069729492638564e-4	1	0.004371681433704551	-0.4046771074968316	0.19271554771065771	-2.099867459082295	0.03643233210017118	1	0.058556473675304026
ENSMUSG00000024529	Lox	0.5129214324198056	0.1424732479408119	3.6001245134306905	2.5132222064316254e-4	1	0.004373383537808852	-0.1610202824506201	0.11651450995598521	-1.3819762234887956	0.17010325365255047	1	0.231100714191165
ENSMUSG00000042828	Trim72	0.614378057596113	0.17013967198007374	3.6110217590408142	2.5133778187448385e-4	1	0.004373383537808852	-0.3780439253945786	0.139452277028177	-2.710919702789744	0.006802874191040258	1	0.012507912214909666
ENSMUSG00000005360	Slc1a3	0.2335098250398962	0.06340321868688978	3.682933293860999	2.5138454653083107e-4	1	0.004373383537808852	-0.5501377290943953	0.05205456992126854	-10.568480921588003	6.177630083674437e-26	1.2352789115315403e-21	6.093016267368789e-25
ENSMUSG00000085887	Arhgap27os3	0.5331689090500794	0.14615234855697262	3.648035179142135	2.5201658644014485e-4	1	0.004380953956937237	-0.02825952837395036	0.12050368648895758	-0.23451173318701696	0.8157878579962171	1	0.8567967350266131
ENSMUSG00000033467	Crlf2	0.30067135529771444	0.08268674273895046	3.6362704024629577	2.5270115239056564e-4	1	0.0043894249350839	0.23456016522580891	0.06814353950035208	3.4421482497925866	5.990343441000994e-4	1	0.001286593937313833
ENSMUSG00000093896	Ighv1-76	2.253073134613017	0.5357525537051611	4.205436108575123	2.530974073709089e-4	1	0.004391215649537594	-0.23520289725559437	0.44104150933356884	-0.5332897069280287	0.6382218167218411	1	0.705994215455018
ENSMUSG00000027424	Mgme1	-0.12579136187494172	0.03445862241692229	-3.650504664782154	2.5319894289500393e-4	1	0.004391215649537594	-0.09157436864610992	0.028356684189856367	-3.229375057852057	0.0012738504712666511	1	0.0026148013686489164
ENSMUSG00000079414	Gm11110	0.6415550645295255	0.17619000078313796	3.6412682994375962	2.535630815287264e-4	1	0.004391769178381367	-0.18772491323829674	0.14544466758374627	-1.2906964301747654	0.19650317286464317	1	0.2619296770748922
ENSMUSG00000095442	Ighv1-4	1.8111498387545826	0.4619031374032267	3.9210598328833317	2.5362560757808897e-4	1	0.004391769178381367	-0.22986763037711627	0.3798045572972344	-0.605226098425202	0.5623049919126428	1	0.6366881580936015
ENSMUSG00000022479	Vdr	-0.16898515310892942	0.046017627409128715	-3.6721830877227517	2.539806664332684e-4	1	0.004394497518512173	0.2549555593404334	0.037871004281667786	6.732210148011568	1.8914845909673808e-11	3.228953345240416e-7	8.123417030228756e-11
ENSMUSG00000004359	Spic	0.7487829726949713	0.20345659884709902	3.68030811946136	2.5554363378415873e-4	1	0.004418105202277634	-0.17610117688510402	0.16767552083276324	-1.0502497681861647	0.2947818894062774	1	0.3710579748361758
ENSMUSG00000035835	Plppr3	0.1791353028411096	0.04913830783715931	3.645532594137157	2.561006416417465e-4	1	0.0044242976530826875	-0.15308745512431413	0.040351054346973635	-3.793889840100196	1.484957162131511e-4	1	3.4519203734421493e-4
ENSMUSG00000040046	Tph1	0.8459009003934616	0.2335269009094744	3.622284615173183	2.570712180477503e-4	1	0.0044376196065015455	-0.8044405417102805	0.19447667759162668	-4.13643708681352	3.028724645402269e-5	0.40666685813816267	7.636504485534945e-5
ENSMUSG00000055172	C1ra	0.2722969799530787	0.07513577960442433	3.6240654104698296	2.58303716568902e-4	1	0.004455438757654759	-0.21263709829040162	0.06170249543411744	-3.4461669142286784	6.038101240644047e-4	1	0.0012962256700971605
ENSMUSG00000096499	Ighv1-5	1.5980280674332434	0.4118467442368498	3.880152240597124	2.616047382550516e-4	1	0.0045088822857576715	0.21751305950109734	0.33892122254276025	0.6417805821341113	0.5570630675264472	1	0.6318606471698516
ENSMUSG00000027848	Olfml3	0.3042796216734955	0.08428759845679824	3.610016505921147	2.632628558092538e-4	1	0.0045339487651793395	-0.1487444289030064	0.0687750661552153	-2.162766787709254	0.031019032396947914	1	0.050557023869358925
ENSMUSG00000041859	Mcm3	0.29075492486230636	0.08032068316728654	3.619925944314262	2.636266051796068e-4	1	0.0045367019271859484	-0.18389618304770292	0.06601770995733205	-2.785558347397342	0.005410594490372083	1	0.010123708207641205
ENSMUSG00000000731	Aire	0.6263973721047745	0.17290639231330615	3.6227542760231985	2.6529041485673165e-4	1	0.00456180604403179	-0.4764039889347447	0.1421221975830597	-3.3520730542906403	7.569763144485348e-4	1	0.0016030722349666268
ENSMUSG00000036606	Plxnb2	-0.07257733764639054	0.01991375103855412	-3.6445839613981725	2.6553265573880285e-4	1	0.00456244565470587	0.11357031962165946	0.01638137552642434	6.932892749968544	4.315415024186171e-12	7.459194869305797e-8	1.9332051480403966e-11
ENSMUSG00000018363	Smurf2	-0.09595042998550068	0.026285829681635942	-3.6502720723529034	2.681794159095326e-4	1	0.004604367425465286	0.043776042830557325	0.02163933292727401	2.022984857143282	0.04338575119388731	1	0.06836458818888085
ENSMUSG00000027577	Chrna4	-0.23300654620864905	0.06398980868178827	-3.6413071238789865	2.690816002488699e-4	1	0.004616295055618815	0.12531619310152414	0.05265354403585887	2.3800144016170974	0.01754638457740078	1	0.029952021728557328
ENSMUSG00000073418	C4b	0.7128424126263703	0.19505155432305854	3.6546358992131327	2.7121908952802405e-4	1	0.004649380555537799	0.8582657010497473	0.16047245235586569	5.348367825441134	5.690566001044797e-7	0.008449352398351314	1.710167262145432e-6
ENSMUSG00000017499	Cdc6	0.5263267653856828	0.1450712550755727	3.6280568821955854	2.71711001567275e-4	1	0.00465422747950226	-0.2198127466494521	0.1193780722481694	-1.8413159344079022	0.06803505402757701	1	0.10257117603954305
ENSMUSG00000094151	Gm7233	0.8808527912679358	0.234779386804962	3.751831893145226	2.732478601533899e-4	1	0.0046769524125177524	-0.34409879972679797	0.19303735462203273	-1.782550327632409	0.08007402706038119	1	0.11879765142822656
ENSMUSG00000062960	Kdr	-0.15092050822742142	0.04163566856587278	-3.6247888751599247	2.7395033165142406e-4	1	0.00468504673683972	-0.032179524436799625	0.034210825615342534	-0.9406240234777634	0.34700803723616136	1	0.4265542951396661
ENSMUSG00000068040	Tm9sf4	-0.07425215379249203	0.02038788251832678	-3.641974772306362	2.741418745838531e-4	1	0.00468504673683972	0.040012628395929	0.016784738516524254	2.3838696299342006	0.01721872633483777	1	0.02942222996380479
ENSMUSG00000019872	Smpdl3a	-0.15264356609826846	0.04180321047008147	-3.6514795007793808	2.763271761635818e-4	1	0.004718768992184081	0.6014148806846672	0.03434152646176519	17.512759118446997	4.294797553441524e-68	9.370818781854062e-64	2.2070101700144886e-66
ENSMUSG00000063506	Arhgap22	0.17383790187086898	0.047862399038370224	3.6320348616772633	2.7838431291194707e-4	1	0.004750252566413907	0.1948507488738098	0.03940968392662477	4.944235260465275	8.093676420540753e-7	0.01193007904387707	2.397396086707299e-6
ENSMUSG00000025551	Fgf14	1.1942924745849959	0.3288131265550044	3.632131378384046	2.796079355725193e-4	1	0.0047674759957273	0.412345199383702	0.2709027640207545	1.522115142952588	0.12965692362101988	1	0.18210243771473397
ENSMUSG00000024135	Srbd1	-0.10064905128602798	0.02772848652709239	-3.629806884255577	2.804790804365564e-4	1	0.004778667701986076	-0.0562194363690514	0.02284157779835986	-2.4612763997891705	0.01391264006450887	1	0.024217331931110607
ENSMUSG00000031731	Ap1g1	-0.087815405753613	0.024088131255517738	-3.6455881455518724	2.8106273085099707e-4	1	0.004784947837923134	-0.01344514670375174	0.0197192028225353	-0.6818301340450992	0.49577098356537797	1	0.5745820175693122
ENSMUSG00000030172	Erc1	-0.1077551768577628	0.029665326116616368	-3.632361108526838	2.814099743036529e-4	1	0.0047871967417664986	0.2328353012345615	0.024394211582657026	9.54469466847188	1.4722230618064986e-21	2.8611182983147495e-17	1.1624710911375587e-20
ENSMUSG00000017405	Nek8	0.10944328883743012	0.030280052267251237	3.6143692181072042	2.837227760782408e-4	1	0.004819344530037888	0.0349342280309685	0.02480004750334033	1.408635528874015	0.15860377097898745	1	0.21744254516657116
ENSMUSG00000029188	Slc34a2	0.4540996009361995	0.1258564799158197	3.608074858282453	2.8373292590668436e-4	1	0.004819344530037888	-0.31675107210792874	0.10267406611645262	-3.085015370372793	0.002203159822236552	1	0.004380529819013986
ENSMUSG00000029659	Medag	0.595543621902728	0.1642366377572613	3.626131355556185	2.8450511455976266e-4	1	0.004828774450090983	-0.4062763517002917	0.1352016834253791	-3.0049651853967103	0.0028243449085545475	1	0.005518968873298256
ENSMUSG00000026944	Abca2	-0.12544780988798346	0.03459519324720017	-3.6261630045421436	2.8586782230668805e-4	1	0.004848204965050394	-0.13722427103188856	0.028450531018182842	-4.823258692225744	1.4089777697360264e-6	0.020514716327356543	4.075814398647468e-6
ENSMUSG00000108968	Gm45011	0.6592859578838821	0.183269481420472	3.597358124080101	2.8666416944256106e-4	1	0.004858007946889891	1.6177092615813675	0.15086734511251346	10.722726381742294	5.891101570130498e-25	1.1712688141733456e-20	5.530924094387076e-24
ENSMUSG00000034768	Asb16	0.5376078889193872	0.14801089927024635	3.6322182458860235	2.873341672104966e-4	1	0.004865656434247154	-0.31235659015463035	0.12138889640560387	-2.5731891417064614	0.009772753286877498	1	0.01748018757124688
ENSMUSG00000020375	Rufy1	-0.09008049414830797	0.024797324108275818	-3.632669950797016	2.8787824653411147e-4	1	0.0048711626339395546	0.046238625528805775	0.02038467164475741	2.2683036712390487	0.023317251375410044	1	0.038939669795425465
ENSMUSG00000108129	4930417O13Rik	1.2692292941851793	0.3399539661070165	3.7335328330472533	2.901240732245006e-4	1	0.004905433703129455	0.09901249260609313	0.2791016590688078	0.3547542244515403	0.727967141617167	1	0.7837258644864202
ENSMUSG00000025262	Fam120c	-0.1444254772338028	0.0395039581223073	-3.6559748465369064	2.90470057205503e-4	1	0.004907554474472018	0.12889296691548718	0.03229961917071523	3.9905413817494564	6.874065037300452e-5	0.897409190619574	1.6630947172444532e-4
ENSMUSG00000000567	Sox9	0.5492450740723356	0.15393079487959302	3.5681299151476695	2.9171730910495814e-4	1	0.004924887590966938	-0.27269322478620045	0.12602858078746118	-2.163741137782702	0.03343158329346926	1	0.05410868198014143
ENSMUSG00000029163	Emilin1	0.2424237486958335	0.0681937969218934	3.55492375609319	2.944871308333794e-4	1	0.004967879566469693	-0.22115470875194915	0.05517024201220349	-4.008586888254548	6.326719663501631e-5	0.8284206727389035	1.5371897710479885e-4
ENSMUSG00000041120	Nbl1	0.2907459529173691	0.08075591987508282	3.600305133878842	2.963409782395302e-4	1	0.0049922312841608595	-0.42245431524334964	0.06623390132249228	-6.3782188095251	1.8298438408745155e-10	3.0519965421946042e-6	7.3059133865599935e-10
ENSMUSG00000024737	Slc15a3	0.39555245599911976	0.11007765094401775	3.593394777294858	2.963793773932181e-4	1	0.0049922312841608595	-0.22105410962144578	0.09051105021785633	-2.442288638673154	0.015119867463962594	1	0.026152998362922238
ENSMUSG00000045625	Pigz	0.4307158836120494	0.11760919652391744	3.6622636353480864	2.985600277784223e-4	1	0.005024481960195368	0.6310645410107232	0.09655304129899084	6.5359364399153215	1.5551073754410513e-10	2.5968738062490117e-6	6.231351379603607e-10
ENSMUSG00000036188	Ankmy2	-0.10147179811136615	0.028161828598797914	-3.603167946121846	2.987456578732853e-4	1	0.005024481960195368	0.0410721984691229	0.02308441859409724	1.7792173669743276	0.07482572217811882	1	0.11177892878048486
ENSMUSG00000017697	Ada	0.3075645553399758	0.08507432875840083	3.615245160657288	2.9940515452714123e-4	1	0.005026841661728995	-0.3568650695738852	0.07009693081106552	-5.091022751563188	3.753341039594479e-7	0.005618000868065016	1.1465622113126955e-6
ENSMUSG00000095923	Ighv1-37	2.182197616531081	0.531735487958147	4.103915698594189	2.9950059393963783e-4	1	0.005026841661728995	-0.5891692887638023	0.4367093240443366	-1.3491108532044698	0.20158359440573245	1	0.2676115123872056
ENSMUSG00000032328	Tmem30a	-0.10561487529570532	0.029200373351505472	-3.61690153835859	2.9958034635607156e-4	1	0.005026841661728995	0.25362531189730925	0.024034298128624763	10.552640669595522	5.379676732812652e-26	1.076150533631843e-21	5.324874865739071e-25
ENSMUSG00000047248	C2cd3	-0.08248158840304745	0.022807955742060765	-3.6163516509697944	2.99973329589455e-4	1	0.005026841661728995	-0.0265151124122112	0.018774780443887713	-1.4122728354377863	0.15815376987851146	1	0.21692605424885772
ENSMUSG00000049659	Aftph	-0.06438123477264612	0.017728228522172932	-3.631566159705334	3.000155375837538e-4	1	0.005026841661728995	0.14092218866877929	0.014395821356458437	9.789103739159486	1.2715545444516201e-22	2.490466730762943e-18	1.0612663229029633e-21
ENSMUSG00000103472	Pcdhga7	0.21084027972017402	0.058061249810507774	3.631342425598574	3.024209235230783e-4	1	0.0050633318053514035	0.07151904218874848	0.04745550207465874	1.5070758723874018	0.13248386302853815	1	0.18555412829659484
ENSMUSG00000039103	Nexn	0.2118978357524264	0.05865578645538665	3.612564907191126	3.026631703779218e-4	1	0.005063577597051983	-0.31376770683629596	0.04833493938982309	-6.491529953223851	8.891570758643084e-11	1.4938728031596245e-6	3.62954211980494e-10
ENSMUSG00000024590	Lmnb1	0.2048988491353185	0.05713472879946273	3.586239988195153	3.03024471678048e-4	1	0.005065813312778547	-0.09120418578641823	0.04683823803197568	-1.9472164116027306	0.05153856272967149	1	0.0798949468935826
ENSMUSG00000020681	Ace	-0.36025713616566035	0.0990987753685105	-3.635333886074794	3.059433116153289e-4	1	0.005110769239303816	0.037959084570739834	0.0814373968019496	0.4661136782534176	0.642656839669083	1	0.7099546590006804
ENSMUSG00000086213	A330040F15Rik	-0.336458736925867	0.09225994533253737	-3.6468560187538706	3.080185858624116e-4	1	0.005141576559658305	0.523180150897676	0.07587796186515706	6.895021137065079	6.727359537260489e-12	1.1588549538884918e-7	2.9783222654911085e-11
ENSMUSG00000061527	Krt5	0.45922018293389844	0.12528203997132323	3.6654909437858203	3.094558157053438e-4	1	0.005161695168860274	-0.3888943801700062	0.1029504646322232	-3.7774902868022937	1.9284066481337935e-4	1	4.420179208816436e-4
ENSMUSG00000027995	Tlr2	0.3406074252095307	0.09557343384326458	3.5638295236740056	3.1044888580420544e-4	1	0.005173793571730417	-0.30026357501473344	0.07843560659008034	-3.828153922286456	1.3673703502636386e-4	1	3.193257521380796e-4
ENSMUSG00000036672	Cenpt	0.25600792899274055	0.07201524530010783	3.5549129621913154	3.1064618272580273e-4	1	0.005173793571730417	-0.08876330257252843	0.0583242790729525	-1.5218928374837268	0.1277951110663845	1	0.17979065606589031
ENSMUSG00000043154	Ppp2r3a	-0.1540060179465969	0.04231387068934964	-3.6396107337294494	3.1452086603006455e-4	1	0.005234408219921441	-0.07474846559891367	0.034661821134532866	-2.156507164144451	0.030936623708942193	1	0.050430096274554775
ENSMUSG00000074886	Grk6	0.11200442041254755	0.031207025549842074	3.589077088864509	3.1622869653703616e-4	1	0.005258897404069949	0.012995507204204232	0.025627159740186853	0.5070990049601758	0.6121493679833205	1	0.6827536635086149
ENSMUSG00000067577	A430093F15Rik	0.9063794039830232	0.25496085636734994	3.5549747396404388	3.171112927532471e-4	1	0.005269636575842047	-0.03322909613095642	0.21049499779488023	-0.1578616902019542	0.8763179521257949	1	0.9055380463823463
ENSMUSG00000027394	Ttl	-0.08915739245147855	0.024747521450321042	-3.6026796715968477	3.1818471766844095e-4	1	0.005283528472269015	-0.13928000147116787	0.02037903654444177	-6.834474297518027	7.793090278324695e-12	1.3409570441913302e-7	3.437146715223049e-11
ENSMUSG00000035047	Kri1	0.08379345303967782	0.023307186606160966	3.5951766489709254	3.186011573954251e-4	1	0.005286498399109324	0.035712327291501755	0.01919087597070983	1.8609013651074537	0.06292988438956079	1	0.09558692453765562
ENSMUSG00000020407	Upp1	0.2697998566153591	0.07457437057034672	3.6178630077856884	3.1943581291575437e-4	1	0.005296398117129992	-0.35258808798813435	0.06123952692154599	-5.757524685646825	9.009061841929193e-9	1.431900289156226e-4	3.1528882517264306e-8
ENSMUSG00000043939	A530064D06Rik	0.871512331179362	0.24004113409741934	3.6306791102964198	3.197828193915483e-4	1	0.005298203659181937	-0.19294733245715268	0.19776540511316618	-0.9756374343973028	0.3335403660461723	1	0.412861965114229
ENSMUSG00000056394	Lig1	0.20421864140713408	0.05682993539081431	3.593504726034633	3.207739713053243e-4	1	0.005310670859758015	-0.2719184768285373	0.046782316360659444	-5.812420119008924	5.763030386115236e-9	9.215085587398262e-5	2.0477992513805514e-8
ENSMUSG00000030357	Fkbp4	-0.13001875664802742	0.03637431934513986	-3.574465694171122	3.213115338632835e-4	1	0.005315615568767227	0.08410828258721671	0.029810748514829906	2.82140794101079	0.004835520563755416	1	0.009131389974040716
ENSMUSG00000040782	Cop1	-0.10240405715993736	0.028466941218121017	-3.5972975240048157	3.2291889085725727e-4	1	0.005335953953002638	0.09257529818393291	0.023430483752782737	3.951062178685839	7.863356895801821e-5	1	1.8909278535446486e-4
ENSMUSG00000042410	Agps	-0.2750736279363426	0.07605256022176898	-3.6168884667949235	3.2302053726549607e-4	1	0.005335953953002638	1.416497702697253	0.062483265155690346	22.670033314804336	3.907187909705275e-108	8.64387181264098e-104	6.739444820066053e-106
ENSMUSG00000026749	Nek6	0.16097805319904818	0.04474975072690821	3.5972949700086576	3.234492761120654e-4	1	0.0053390725836569486	0.3070587522073972	0.03680180089376176	8.34357951921441	8.79276087501045e-17	1.6328156944894407e-12	5.312887397592159e-16
ENSMUSG00000027454	Gins1	0.2750367651589882	0.07642745012809245	3.5986646773904716	3.246111055767229e-4	1	0.0053542785101465245	0.5461272737085962	0.06332014356507895	8.624858425143957	5.2976712917044126e-18	9.966509001083512e-14	3.4276965371245964e-17
ENSMUSG00000024742	Fen1	0.19193735212860893	0.05344893633601862	3.591041567636671	3.2771212440828903e-4	1	0.005401424059413956	0.15759646322569623	0.0440153296380701	3.5804903546465003	3.50502698107064e-4	1	7.75560415232725e-4
ENSMUSG00000014599	Csf1	0.30568257581937536	0.08558359546544415	3.5717426237695276	3.279884851667656e-4	1	0.005401977633934642	-0.3590558993718906	0.07022171341679045	-5.113174855771008	3.635209210185593e-7	0.005443362271331907	1.111391043361358e-6
ENSMUSG00000040952	Rps19	0.12074873617099145	0.03362878028649203	3.5906368040203254	3.2955315746422705e-4	1	0.005423733215041802	-0.07336453183724587	0.027660277186469205	-2.6523426118496807	0.007968509673206394	1	0.014489442570770244
ENSMUSG00000026787	Gad2	0.901016222585655	0.24523003726557538	3.6741674577567616	3.301497440053573e-4	1	0.005429535812167927	-0.308746203452017	0.20185865970845654	-1.5295167613712366	0.1315534249583179	1	0.18448058121674776
ENSMUSG00000042842	Serpinb6b	0.22159986635915024	0.06194563006158183	3.5773284756140473	3.3057852123249287e-4	1	0.005432572138806646	-0.3872132423800299	0.050898994543306146	-7.607483131136886	2.703039875232423e-14	4.849794144142013e-10	1.3954835328027063e-13
ENSMUSG00000027822	Slc33a1	-0.1475793484435647	0.0408934913853508	-3.6088713250938462	3.3098276030914936e-4	1	0.005435201032943825	0.23119144062722502	0.033488096103450986	6.9036901922710525	5.430663430278497e-12	9.372782014317659e-8	2.420142038596572e-11
ENSMUSG00000027322	Siglec1	0.6694048813759513	0.18744808375934635	3.5711481704734904	3.317318102143609e-4	1	0.00544348415123875	-0.06062697891799563	0.15418707553150854	-0.3932040264010737	0.6983018233962284	1	0.7580013490472275
ENSMUSG00000004612	Nkg7	0.810970220233725	0.21944841382763539	3.6954936519645902	3.323694487826995e-4	1	0.005447597941137483	-0.1547685486226547	0.18065236713540314	-0.8567202914460129	0.40207300104779575	1	0.48265679468679884
ENSMUSG00000060572	Mfap2	0.41983606139310603	0.11914411794357922	3.523766583188938	3.3269340249320414e-4	1	0.005447597941137483	-0.35423145715310234	0.09700723601756807	-3.6515982899353077	2.6587265654142393e-4	1	5.993245345662267e-4
ENSMUSG00000083563	Gm13340	-0.8390306572162518	0.23290338518649772	-3.602483736096823	3.3285340988650487e-4	1	0.005447597941137483	0.7846745072078398	0.18951397831741645	4.14045715347493	5.747559210643635e-5	0.7550568535022544	1.4030602303459299e-4
ENSMUSG00000038485	Socs7	-0.10843439168275909	0.03017262276830015	-3.5938006621248064	3.329618084556639e-4	1	0.005447597941137483	0.18628698906807467	0.02483427896690163	7.501203852801698	6.915722971951052e-14	1.2330042486691531e-9	3.479126200517361e-13
ENSMUSG00000044468	Tent5c	0.3260589556573564	0.0918495095595958	3.5499259301520354	3.334131587255182e-4	1	0.005450974426746147	-0.2602389033123327	0.07512212997657548	-3.4642109241774715	5.935647573024604e-4	1	0.0012757084337619092
ENSMUSG00000041552	Ptchd1	0.42970265797186075	0.12046835814030715	3.566933795772284	3.3443484836818553e-4	1	0.0054636635910723175	0.891324202505331	0.09903430947120749	9.000155675992955	4.618949349473881e-19	8.790322506983743e-15	3.1908178197809168e-18
ENSMUSG00000055737	Ghr	-0.16621511678444617	0.04630182456957197	-3.5898178598706294	3.358899149168718e-4	1	0.005483409021874771	0.22795712978739116	0.038104513327575855	5.982418088579047	2.2409801084611873e-9	3.626354011511893e-5	8.214834990670491e-9
ENSMUSG00000022947	Cbr3	0.33652405779374595	0.09505997767536621	3.540123467554239	3.3614233468791616e-4	1	0.005483506663592978	-0.7632648059517327	0.07774116127875118	-9.818026813555642	1.073851335809565e-22	2.1043190776524238e-18	8.996335117883521e-22
ENSMUSG00000020467	Efemp1	0.22489463555496259	0.0629314868569512	3.573642492607363	3.37588406530461e-4	1	0.0055030620027174265	-0.4359018979034213	0.051604616547891724	-8.446955467615616	3.4039860063847284e-17	6.347753104706241e-13	2.1016118931206044e-16
ENSMUSG00000037474	Dtl	0.6927701552404496	0.19290871600904566	3.5911812051455727	3.379279999295147e-4	1	0.0055045650998767435	-0.0760260862465158	0.15854149456540065	-0.479534310275812	0.636121188509442	1	0.7041255877785093
ENSMUSG00000048582	Gja3	-0.5528062098525721	0.15396904223475694	-3.5903724659773313	3.387333119943924e-4	1	0.005513646616815819	-0.49145630446711286	0.12681865037196416	-3.8752683696416255	1.1126358432992228e-4	1	2.629275716785366e-4
ENSMUSG00000033014	Trim33	-0.07169514682367335	0.019968979678471183	-3.590325994520833	3.393427271652605e-4	1	0.005519528524966529	-0.10120864075715522	0.016434210098708716	-6.158412247942934	7.491252562552651e-10	1.2301385832967709e-5	2.8586496444753737e-9
ENSMUSG00000071005	Ccl19	0.74093626324288	0.1984064971026407	3.734435485041475	3.4047884900455006e-4	1	0.005533962650986299	-0.4855028606746043	0.16144703050871106	-3.0071959771871333	0.0032801472828956255	1	0.006353839748560161
ENSMUSG00000001555	Fkbp10	0.25026463221897954	0.07066904350348288	3.5413615327430517	3.4149596180845307e-4	1	0.005546442807445175	-0.2588943593161945	0.05781878562003067	-4.477685868699799	7.434067729619592e-6	0.10386879431824493	1.997771027195236e-5
ENSMUSG00000022200	Golph3	-0.06399043896354249	0.017802778877413113	-3.594407334055526	3.427689708977581e-4	1	0.005563057893104315	0.12167542179609862	0.014502732124145068	8.389827568663815	5.001449907431011e-17	9.31370001761803e-13	3.065764790364943e-16
ENSMUSG00000043557	Mdga1	0.5654459588382731	0.1588035659443339	3.560662857133078	3.434604295971023e-4	1	0.005570217214989157	0.04096465468393163	0.13049687577673977	0.31391291508017327	0.7551276190506342	1	0.8069902815184508
ENSMUSG00000022546	Gpt	0.3283409756234399	0.09081970451473231	3.6153054821949797	3.444444888425807e-4	1	0.0055821080271203655	1.0195613159611667	0.07463531793297394	13.660574433095887	5.311063298260891e-41	1.1205281346670828e-36	1.024059527292921e-39
ENSMUSG00000057948	Unc13d	0.2591984711852314	0.07285255780056035	3.5578499782369724	3.4520763021617394e-4	1	0.005590403915531358	-0.13867395807515367	0.059901295074194554	-2.3150410671988015	0.021203598273913632	1	0.03565608110586852
ENSMUSG00000050721	Plekho2	0.28061258591453486	0.07903627070115941	3.5504279671234342	3.4552009683390004e-4	1	0.005591394672473535	-0.12572625814519087	0.06495683588364506	-1.9355354434196883	0.053873852597279455	1	0.08309629101220471
ENSMUSG00000035173	Ccdc186	-0.07894385540169152	0.022055501919500987	-3.5793270853605517	3.4613265951498486e-4	1	0.005597236778247041	-0.10426251761740603	0.01813556778589257	-5.749062772576138	9.206328142687782e-9	1.462609352028808e-4	3.218381893212032e-8
ENSMUSG00000043263	Ifi209	0.6859972641972089	0.19140347096962881	3.5840377435269204	3.4645919235553463e-4	1	0.005598448430721133	0.10870985848313139	0.15760668641525521	0.6897541021623118	0.49571578619103845	1	0.5745754325858847
ENSMUSG00000062797	Hikeshi	-0.10606411287340343	0.029646242107514636	-3.5776579199735616	3.488517327885318e-4	1	0.005633018799911191	0.05060621368902427	0.024415562787129075	2.0727031414447623	0.038225224206828265	1	0.0610749381846028
ENSMUSG00000022054	Nefm	0.5715087082787343	0.15741049391203885	3.630690013577456	3.504511189560828e-4	1	0.005654741006448005	-0.4608980800851324	0.1289390552209622	-3.5745420911863652	3.592795604022124e-4	1	7.938758191171428e-4
ENSMUSG00000066232	Ipo7	-0.06962046665845642	0.01942436112008337	-3.5841830898867473	3.532470349942974e-4	1	0.005695724475114574	0.06878017664148789	0.01593014292565172	4.317612024103922	1.592792666061616e-5	0.21784625293724721	4.133088001462043e-5
ENSMUSG00000102765	Ighv1-62	1.88447352125036	0.46377540402780537	4.063332175195254	3.537168425684721e-4	1	0.005697035392545555	0.6057571911650133	0.3815596752018644	1.5875817874216844	0.18020281450081824	1	0.24301168639137616
ENSMUSG00000007777	0610009B22Rik	-0.11371002408788039	0.03171759007342212	-3.5850776753421805	3.5431191757504183e-4	1	0.005697035392545555	0.27858688185197716	0.025992437098697883	10.717997731191327	9.033584531951963e-27	1.815298811695747e-22	9.318789495617206e-26
ENSMUSG00000000817	Fasl	0.7982691673168754	0.22425995322674439	3.559570738471361	3.5486564594267386e-4	1	0.005697035392545555	-0.03536054961135611	0.1850160777825786	-0.1911214962242904	0.8499847159322165	1	0.8849019751185022
ENSMUSG00000020372	Rack1	0.08362408578684034	0.02342592534047365	3.5697239093629567	3.548943675096122e-4	1	0.005697035392545555	-0.02556615008593687	0.01928080722564178	-1.3259896116764311	0.1848952994386073	1	0.24854137061610893
ENSMUSG00000014353	Tmem87b	-0.10450868860187532	0.0292875021291613	-3.568371523832241	3.548954755466905e-4	1	0.005697035392545555	0.27204065510319797	0.024088988106451496	11.293154112618796	1.5508900260153825e-29	3.1557510249361004e-25	1.8118008388409215e-28
ENSMUSG00000025134	Alyref	0.09272498420143892	0.02596771175067257	3.5707799397856963	3.5499138199397094e-4	1	0.005697035392545555	0.028443251476983466	0.0213914632296632	1.3296543191838164	0.1835843454017661	1	0.24696178788691814
ENSMUSG00000015127	Unkl	-0.13553547635199165	0.03799528546444252	-3.5671656284522735	3.55120582870913e-4	1	0.005697035392545555	0.13599256185011455	0.031231466557101652	4.3543444109956955	1.4131325241282488e-5	0.19403722688804984	3.690131650554825e-5
ENSMUSG00000055943	Emc7	-0.06337153432931189	0.017725202088625658	-3.57522210536475	3.558687731848636e-4	1	0.005704925124017579	0.07509932354650851	0.014554433843648297	5.1598931537472765	2.4892849277231683e-7	0.003751601314571587	7.713282123209611e-7
ENSMUSG00000000934	Top1mt	0.12942412405951084	0.036118446352749245	3.5833247863292828	3.6316145478176805e-4	1	0.005817642570445732	0.3274444114046827	0.02955726142749886	11.078306838672201	1.5053087869983874e-28	3.0497556024587328e-24	1.6814571194528673e-27
ENSMUSG00000030259	Rassf8	-0.10547445277217736	0.02949654642918909	-3.575823801114639	3.655665044807277e-4	1	0.005851957044029261	0.014828350657789492	0.024274794783114482	0.6108538008364164	0.5423203186341669	1	0.6180051935843924
ENSMUSG00000024053	Emilin2	0.39447250076671303	0.11228997434913661	3.512980593799077	3.662168949536886e-4	1	0.00585815393933467	-0.3199701970444175	0.09180010222637765	-3.485510247639767	4.972212299700257e-4	1	0.0010777001352097256
ENSMUSG00000004891	Nes	0.21640490745789948	0.06110902818735639	3.5412919150737565	3.6836093552774867e-4	1	0.005888217799158	-0.48770507751292436	0.04993014498034972	-9.767748074932756	2.0730791427597294e-22	4.0545281874094785e-18	1.7122525614531086e-21
ENSMUSG00000081665	Gm15922	0.9463100082025193	0.2704349485362627	3.499214925158345	3.7203733900545194e-4	1	0.005940169720170168	0.230784820147172	0.22201848185829504	1.0394847231433288	0.3128970670264073	1	0.39083151669499205
ENSMUSG00000026628	Atf3	0.5296854166444366	0.1477743827218552	3.584419754548556	3.7214491887632977e-4	1	0.005940169720170168	-0.4056040521286426	0.12114342391127658	-3.348130992448259	9.344798545756885e-4	1	0.0019557102374119307
ENSMUSG00000007207	Stx1a	0.26722400364423643	0.07520740320332589	3.553160889251645	3.7460518663355585e-4	1	0.005975154127443191	-0.3723634569003595	0.06197258632753171	-6.008518910803222	1.8536163063478966e-9	3.0065656488962883e-5	6.8376685067219906e-9
ENSMUSG00000070056	Mfhas1	-0.14322528961730602	0.04025017188222844	-3.5583770930564382	3.7504910930204796e-4	1	0.005977949664097327	0.13707636647621166	0.03311171982455338	4.139814156514009	3.371006675136112e-5	0.4511081132667145	8.456400172317206e-5
ENSMUSG00000059495	Arhgef12	-0.0934961930179753	0.026279772988629956	-3.557724530513516	3.7632541317209463e-4	1	0.005993999118462618	-0.02603740815384226	0.021612023208162096	-1.2047649543523002	0.22890789743111786	1	0.29860789823274025
ENSMUSG00000004931	Apba3	-0.10464769880589643	0.029495807211123982	-3.5478838757269147	3.773502109527301e-4	1	0.0060039788240687205	0.09769696280924815	0.024248809888648477	4.028938461634883	5.574512107539585e-5	0.7328811067782293	1.3623115750122276e-4
ENSMUSG00000024695	Zfp91	-0.06048117004453409	0.017002705269824055	-3.5571498232033965	3.7749163520166013e-4	1	0.0060039788240687205	0.1079882462809834	0.013991020895103049	7.718396469465642	1.2240705674776536e-14	2.2099370025241558e-10	6.488040542388107e-14
ENSMUSG00000086291	Gm15513	0.6767276393538902	0.1920716576901081	3.523308162653206	3.781416609418079e-4	1	0.006007585761421349	0.05011090578211705	0.15760374536323013	0.3179550439402706	0.7520400963526672	1	0.804734259110474
ENSMUSG00000035004	Igsf6	0.46765539660548633	0.1313093883248755	3.5614772300092485	3.7842309274585816e-4	1	0.006007585761421349	-0.16443858608274411	0.10813803138926392	-1.5206360238870575	0.12940500753924256	1	0.18180267854247292
ENSMUSG00000079685	Ulbp1	0.6243427138337858	0.17722757368568232	3.5228305666536617	3.7863071155499236e-4	1	0.006007585761421349	0.3827438279893982	0.1462271701093782	2.6174604056353217	0.009100263897603347	1	0.016380033326773343
ENSMUSG00000026073	Il1r2	0.9337972609639013	0.2608230856363493	3.580194056387483	3.787983831411691e-4	1	0.006007585761421349	-0.031510563744913365	0.21366035170788747	-0.14747969613002432	0.8844935225878551	1	0.9122854731732253
ENSMUSG00000079316	Rab9	-0.08088570697955884	0.02265439344225288	-3.5704203330687414	3.7945967819382793e-4	1	0.0060104401976574925	-0.052305320963500726	0.018370064502907617	-2.8473128635570024	0.004356233556906416	1	0.008281997479070588
ENSMUSG00000081723	Gm15931	0.6176444581672014	0.1708335559446485	3.6154750438334453	3.7951860490354486e-4	1	0.0060104401976574925	0.05153725298036648	0.1405411164389226	0.3667058743109098	0.7153416644706659	1	0.7729358216936234
ENSMUSG00000037035	Inhbb	0.43421362730890106	0.12196525043049089	3.5601421370127335	3.8057227037577854e-4	1	0.006022840389851671	0.04155607216632353	0.10032317546848439	0.4142220575880594	0.681880410056901	1	0.743350203526339
ENSMUSG00000027452	Acss1	-0.17411068634797913	0.04864497235487474	-3.579212360895327	3.8357601474811565e-4	1	0.006066062476304422	-0.6937355449075028	0.0398821976659199	-17.39461678412755	2.720208407418547e-67	5.933318578261336e-63	1.3756217562152293e-65
ENSMUSG00000028885	Smpdl3b	0.44869549004231385	0.12639813472766062	3.5498584770185104	3.864140256659684e-4	1	0.006103254853064564	-0.22605831567828688	0.10406756070804019	-2.1722265241950827	0.030304649016907582	1	0.04945425341219
ENSMUSG00000024660	Incenp	0.23460356067735785	0.06622591981502077	3.5424734202656887	3.8693856799693234e-4	1	0.006103254853064564	-0.054380215848662546	0.05450373013771561	-0.9977338378723625	0.3179831914847541	1	0.3964222165349914
ENSMUSG00000024817	Uhrf2	-0.09127275323907807	0.02571156813344865	-3.5498711228094906	3.871002184264826e-4	1	0.006103254853064564	-0.09717374953083475	0.021171992538989794	-4.589730954792379	4.489558576395156e-6	0.06350480606310949	1.2322334758032392e-5
ENSMUSG00000024883	Rin1	0.2711235473958094	0.07658826530312775	3.540014208739849	3.8718991378357563e-4	1	0.006103254853064564	-0.2012215355484458	0.06302887642155705	-3.1925293131137633	0.0014622136036880774	1	0.0029786427625801896
ENSMUSG00000031835	Mbtps1	-0.07520434943946616	0.021253215349352178	-3.5384927975972573	3.8729926082095925e-4	1	0.006103254853064564	-0.04015535258577959	0.01739393239896696	-2.3085839167780398	0.021084797406350556	1	0.03547775461953314
ENSMUSG00000035539	Ccdc180	-0.5290461259792534	0.14931267146140043	-3.5432098347796273	3.8826558880588133e-4	1	0.006112756376744414	-2.6272468462075405	0.12292020635378961	-21.373596124999857	1.1937843107634308e-95	2.633249432681976e-91	1.3692213762266545e-93
ENSMUSG00000027379	Bub1	0.8085461569699047	0.22416289511065504	3.606958040806783	3.8855147065460844e-4	1	0.006112756376744414	-0.22005478314028734	0.18457598128470526	-1.1922178693491903	0.23966345339373857	1	0.3107120842197796
ENSMUSG00000020695	Mrc2	0.21955217975049737	0.0628315132275476	3.494300367323284	3.8872636165086273e-4	1	0.006112756376744414	-0.2689334201941642	0.05090964581110348	-5.282563174609818	1.3429119812818425e-7	0.002045120656294118	4.253768409184888e-7
ENSMUSG00000024421	Lama3	-0.26875109631545807	0.07484232004569305	-3.5908974514870597	3.896914618590724e-4	1	0.0061181682277966255	0.9033958237045857	0.061357679020341574	14.723435405780062	1.4915960586194246e-47	3.188734054116606e-43	3.797426075553869e-46
ENSMUSG00000059146	Ntrk3	0.3163901540550909	0.08765681835514036	3.6094186395545487	3.898616351875383e-4	1	0.0061181682277966255	-0.39921520840891167	0.07175853914419726	-5.56331292651732	2.831104793979636e-8	4.424450572031375e-4	9.510101565646268e-8
ENSMUSG00000090877	Hspa1b	-0.41776023938369544	0.11723325479349833	-3.5634960414565247	3.8989540007260863e-4	1	0.0061181682277966255	-0.800498989026339	0.09549906461269254	-8.382270468018245	4.507028468425913e-16	8.30329854738106e-12	2.6191144019572993e-15
ENSMUSG00000005609	Ctr9	-0.06472998234181185	0.01824591000496443	-3.5476434074376026	3.924032222686957e-4	1	0.006153181183016735	0.0517843009654916	0.015021572347326267	3.447328932560701	5.644306485569785e-4	1	0.0012163822141444387
ENSMUSG00000022534	Mefv	0.988137619709637	0.2754780868848428	3.5869917309346815	3.9273640168329576e-4	1	0.006154068784404939	0.2535269605188326	0.22720822036985547	1.1158353342415817	0.27018101462372063	1	0.34447614923174463
ENSMUSG00000030017	Reg3g	1.2066384451238528	0.3139897241796422	3.8429233576876594	3.9375683846585836e-4	1	0.006165716687335549	0.12702783171683815	0.2572226468305827	0.49384388692844705	0.6346256648136541	1	0.7027498590508917
ENSMUSG00000063511	Snrnp70	0.06782516319085002	0.019222541980752465	3.5284180031321233	3.943966276936566e-4	1	0.00617139195697015	-0.029304373010958572	0.015527380412307407	-1.8872708874789441	0.05905512434624221	1	0.09017537550289839
ENSMUSG00000029616	Erp29	-0.11020525119390948	0.03124326424628235	-3.5273283330829575	3.983003249864536e-4	1	0.0062280959460812215	-0.0415627937210404	0.025598652387805943	-1.6236320995100142	0.10412909688236743	1	0.14995641283603378
ENSMUSG00000028967	Errfi1	-0.21851330721041667	0.06108206021444913	-3.577372905289248	3.9869499095961103e-4	1	0.006229889216181394	0.2561368600943084	0.04993262085521945	5.129649830257898	3.360477516787093e-7	0.005036683702160495	1.0293775499178083e-6
ENSMUSG00000074151	Nlrc5	0.5790829854264404	0.16039703382298295	3.6103098144915	3.9942050056903343e-4	1	0.006236846005727412	-0.4238640624598679	0.13179999663053035	-3.2159641372986454	0.0015637276579077149	1	0.0031709199048669066
ENSMUSG00000031146	Plp2	0.19163452286243213	0.05423699092013019	3.5332808773376567	4.024340350426684e-4	1	0.00627949489041684	-0.2518349225927674	0.04456214952840685	-5.651319006329155	1.6579024158757602e-8	2.6130199976617856e-4	5.6832516801188634e-8
ENSMUSG00000029328	Hnrnpdl	0.09407825379779343	0.026639082327064828	3.53158763664361	4.0381502739483507e-4	1	0.006296628013008041	-0.059977157475870034	0.02185901297954928	-2.743818192156393	0.005958601620070381	1	0.011075502852575896
ENSMUSG00000022996	Wnt10b	1.0149054705976166	0.2899254673761943	3.5005737156602414	4.05673133925674e-4	1	0.0063211715006863956	-0.44753856955901006	0.23807390878959478	-1.8798303931512974	0.06151540331802677	1	0.0936237509732841
ENSMUSG00000094840	Muc3a	0.6940080728551756	0.19759720067942055	3.512236359973168	4.066245522351771e-4	1	0.006331562569478605	-0.0496514922942942	0.16258133731959518	-0.3053947833919677	0.7624858337701549	1	0.8129406941648163
ENSMUSG00000050075	Gpr171	0.8290052312737554	0.23593932736104925	3.513637342896885	4.1226041909366083e-4	1	0.006414829779897236	-0.048351310622888076	0.19405085848853207	-0.24916823867463345	0.8075272270671522	1	0.8500065438039265
ENSMUSG00000024338	Psmb8	0.5036848526884965	0.1407938174595882	3.577464279161749	4.133683753486972e-4	1	0.006427574926543579	-0.3462118673257124	0.11566362315722113	-2.993264933911917	0.003259127136401149	1	0.006316971943559405
ENSMUSG00000067274	Rplp0	0.09620613001048132	0.02717000424668786	3.5408949198897997	4.1445768444875805e-4	1	0.006440012525607064	-0.027928260221324393	0.022243555548795667	-1.2555663666295702	0.2086475359961371	1	0.27562433646699397
ENSMUSG00000042644	Itpr3	0.2217304034162803	0.06259161805248595	3.542493552896319	4.1566193897991526e-4	1	0.0064542175884452855	-0.5673583525176628	0.05151557420112607	-11.01333647767554	6.33301393971083e-28	1.2797754569367646e-23	6.894123932118673e-27
ENSMUSG00000024155	Meiob	0.39636594504840134	0.11200127361874429	3.538941408806144	4.160179947159498e-4	1	0.006455241562360251	-0.11051159285570908	0.09237076362793775	-1.1963914610562405	0.23058734640775383	1	0.30043325008308525
ENSMUSG00000022201	Zfr	-0.07529064496667705	0.021255234672302226	-3.542216594050997	4.1763893433165687e-4	1	0.006475877301612333	0.010226485214786848	0.017410856406005627	0.5873625613992984	0.5571856356274756	1	0.6319674573527863
ENSMUSG00000070730	Rmdn3	-0.08709750396957752	0.02460965442375767	-3.5391599763991537	4.197023712307494e-4	1	0.006503340851152789	0.2155654441684486	0.0201930132910134	10.675248961698193	1.5033483911351583e-26	3.016468546812695e-22	1.529538411117897e-25
ENSMUSG00000017652	Cd40	0.35528036531590285	0.10207051933630987	3.4807343748815223	4.2241559853291495e-4	1	0.006540827754318643	-0.17002300653703975	0.08348766460054546	-2.036504522560677	0.04271520316324779	1	0.06744170762686628
ENSMUSG00000026955	Sapcd2	0.9681274289365399	0.2701128111723222	3.5841596136619733	4.2456505660586606e-4	1	0.00656953899481024	-0.5064572737222294	0.22289601071551612	-2.2721684075747084	0.024073367199096994	1	0.040106056719609706
ENSMUSG00000039428	Tmem135	-0.07480805124511958	0.021176448932060304	-3.5326060325375495	4.253796980822106e-4	1	0.006577570300227428	-0.0744129056695024	0.017344367002131874	-4.290321212665528	1.7668898338802565e-5	0.24095076664625056	4.563559569781728e-5
ENSMUSG00000051375	Pcdh1	-0.11312113445245407	0.03212677314209962	-3.5210861032357363	4.265831040194678e-4	1	0.006591597671900818	0.539250151787234	0.02640930644310039	20.41894409264643	6.186480900446924e-92	1.3631910664134797e-87	6.343566198886843e-90
ENSMUSG00000036944	Tmem71	0.28070615275977734	0.08002634229251897	3.507671908003952	4.2759848182292873e-4	1	0.0066027021644982555	-0.2874653346750174	0.06590527349786912	-4.361795641198755	1.2719967769465368e-5	0.17502675650784347	3.332925139406193e-5
ENSMUSG00000028552	Eps15	-0.06911200220004025	0.019597126201453572	-3.5266396455064943	4.307189772693724e-4	1	0.006646274593079615	0.05336805007728409	0.01612528769369207	3.309587468517584	9.429769295093694e-4	1	0.0019729364982146664
ENSMUSG00000028532	Cachd1	-0.10305958771893665	0.029153557985718868	-3.535060378202253	4.3147846857822424e-4	1	0.006653380044583553	-0.2589431027103975	0.02387312020120555	-10.846638417098127	2.3690814274939157e-27	4.775594341542235e-23	2.51740357417226e-26
ENSMUSG00000073795	6430531B16Rik	0.7190953617046387	0.20510126646111732	3.506050323882146	4.328560072686079e-4	1	0.006669631671615613	-0.2729267561642418	0.16865227756128406	-1.6182808801088793	0.10431413319450593	1	0.15019372186559798
ENSMUSG00000026009	Icos	0.7233748360025309	0.20203567586618845	3.5804311931603308	4.331318936445355e-4	1	0.006669631671615613	-0.044694410443089735	0.16637238810606067	-0.26864079401563623	0.7895011662772126	1	0.8346648192537776
ENSMUSG00000072663	Spef2	0.33606919222646314	0.09521600127120539	3.5295453257822857	4.3396097810225224e-4	1	0.006677777125693786	-0.43255200048963344	0.07860650787188421	-5.502750499928361	3.7276918057298884e-8	5.793951373645966e-4	1.2363224082470672e-7
ENSMUSG00000026547	Tagln2	0.16660738791659022	0.047414291281361085	3.513864352161789	4.3439727337160345e-4	1	0.006679871271452349	0.1458582169670721	0.03899473059797383	3.74045966545672	1.8747451034105175e-4	1	4.3040603895983724e-4
ENSMUSG00000091255	Speer4e	1.171339337431223	0.31823642312905415	3.6807205344820346	4.348264621058827e-4	1	0.0066818533206616	-0.6069795713264802	0.2610614309219004	-2.325044987239288	0.023865973631357545	1	0.03977938439781536
ENSMUSG00000047878	A4galt	0.17171249133605637	0.049161060202828955	3.492855740449943	4.355767814531937e-4	1	0.006688763950389933	-0.07533077920679501	0.040369944346045385	-1.8660114703421524	0.06271813638375173	1	0.09531083545109001
ENSMUSG00000020271	Fbxw11	-0.08857637275742902	0.025132868174307755	-3.5243240899968917	4.364359724987028e-4	1	0.00669733574073699	0.2857196117926939	0.020657121814123495	13.831530566729018	3.175061152387079e-43	6.732082161406324e-39	6.734822278528588e-42
ENSMUSG00000040867	Begain	0.6256382785066906	0.1774458163795662	3.5257989806218735	4.403288779535448e-4	1	0.006752417548824483	-0.49812179958545083	0.14616517717866104	-3.407937575833026	6.797064177802731e-4	1	0.0014479796555317242
ENSMUSG00000038014	Fam120a	-0.06115861970413566	0.017346737110599184	-3.5256555347672034	4.411205954978831e-4	1	0.0067598997041483444	0.20605994494049068	0.014210514460405367	14.50052674128257	1.388369466635337e-47	2.9683339196663506e-43	3.542730390149413e-46
ENSMUSG00000025964	Adam23	0.6693676909012246	0.1898330298048839	3.5260865382026556	4.4331748155913327e-4	1	0.0067846428275911514	-0.12475355110448441	0.15638897898745027	-0.7977131886927626	0.42904965266900696	1	0.5100050121020393
ENSMUSG00000051735	Rinl	0.30062257312555224	0.08593063243815903	3.498433150039932	4.4334504837164777e-4	1	0.0067846428275911514	-0.08867789461378933	0.07072126673732868	-1.2539070452902767	0.2112827239681827	1	0.2786752751046848
ENSMUSG00000059401	Mamld1	0.20269958190095982	0.057694965430975166	3.513297570885359	4.460664360926497e-4	1	0.006821597436080789	-0.264006677053022	0.04756812452753796	-5.550075385044543	2.7076750018257648e-8	4.2345329353553134e-4	9.11061189560337e-8
ENSMUSG00000057400	Ces1c	-1.5886463715936545	0.408627924238999	-3.887757731075873	4.475189916598153e-4	1	0.006839110634218784	-1.2356352630522665	0.3342801148052474	-3.6964067209685845	0.0010526949789476424	1	0.002187682448544316
ENSMUSG00000049327	Kmt5a	-0.11216140725108391	0.031880731523728875	-3.5181566385201046	4.51394479329401e-4	1	0.006891275943344912	0.17508101180763275	0.026232407628055787	6.674225800775606	2.839079237857841e-11	4.827570336053473e-7	1.2037414657312276e-10
ENSMUSG00000021910	Nisch	-0.07525730787852417	0.021434724432733476	-3.510999551904523	4.515518549906468e-4	1	0.006891275943344912	0.11390695152052054	0.017637205935651847	6.4583331359911735	1.0226456951424244e-10	1.7156926827404456e-6	4.156144175819925e-10
ENSMUSG00000058594	Fbxo18	-0.07109520364858198	0.020221052500426127	-3.5159002552950076	4.5233776987598916e-4	1	0.0068962794063382234	-0.0518174240640231	0.016584901822308193	-3.1243732775266704	0.0017750994992478983	1	0.003577369709063036
ENSMUSG00000062007	Hsh2d	0.9215511370380767	0.2644254844382947	3.4851071143754533	4.5249957005320243e-4	1	0.0068962794063382234	-0.1983708089068685	0.21794731076495216	-0.9101778233033755	0.3649607815113082	1	0.4452161375771994
ENSMUSG00000018398	Sept8	0.13797216680761126	0.039286760316400125	3.5119252821163585	4.5462955407351197e-4	1	0.006922327676945869	-0.0024374156051579286	0.03232498150558991	-0.07540346480125379	0.9398122364807533	1	0.9558788715972594
ENSMUSG00000029580	Actb	0.1720619148015699	0.04938192745767203	3.4843094156066234	4.5483093180957534e-4	1	0.006922327676945869	0.041012066517949294	0.0404258760517565	1.0145003775661485	0.31055936442494886	1	0.3882253837005537
ENSMUSG00000059070	Rpl18	0.104265355359451	0.029790074282399027	3.5000032014372806	4.5546139688255833e-4	1	0.0069271849227845565	-0.038963325132066864	0.024518138922461064	-1.5891632417651638	0.1120451872443446	1	0.15999983707957333
ENSMUSG00000025877	Hk3	0.719238752186054	0.20325154041218135	3.538663228467952	4.563819651621689e-4	1	0.006936444745097964	-0.39983822145330405	0.16736185425741212	-2.389064241833327	0.01872386382683069	1	0.03183743649784577
ENSMUSG00000034327	Kctd9	-0.10870529780108264	0.03101022253429782	-3.505466549969217	4.5931937713875477e-4	1	0.006976324546562752	0.09327311715360553	0.025484707638591387	3.6599641822989737	2.477133404544659e-4	1	5.607762273326199e-4
ENSMUSG00000027752	Exosc8	0.13376813419380626	0.03837331630182344	3.4859675182009173	4.5978798838071616e-4	1	0.006978678396629819	-0.113279660013904	0.03153580187627286	-3.5920970222461404	3.1615223545221316e-4	1	7.041040327341803e-4
ENSMUSG00000028293	Slc35a1	-0.08350346949641163	0.023819589454577985	-3.505663674667691	4.607581339975034e-4	1	0.006988636155131866	-0.16879542357737606	0.019570719981614495	-8.624895953544332	6.5066917063421125e-18	1.222932706207e-13	4.186928534235731e-17
ENSMUSG00000030589	Rasgrp4	0.3775328620639078	0.1097050037759645	3.4413458736566973	4.6130972748211174e-4	1	0.006989565734732036	-0.06052409268386245	0.08974247199937059	-0.6744197182832999	0.5045807163583564	1	0.583152003308045
ENSMUSG00000026384	Ptpn4	-0.12800586014169382	0.036239189461634284	-3.5322495354707395	4.614476681641886e-4	1	0.006989565734732036	0.16514628438235437	0.029734538344031006	5.554022143259752	2.8447214269247735e-8	4.445161701712651e-4	9.55295751139498e-8
ENSMUSG00000000085	Scmh1	-0.07512919559675287	0.02151895148906539	-3.4913037298740557	4.645700361636657e-4	1	0.007032073384134507	0.04872178609097682	0.017532527710251912	2.778936779463203	0.00548137412430002	1	0.01024838716408703
ENSMUSG00000105826	Gm42141	1.11693527764151	0.32006541717419706	3.489709345991644	4.6537376194316047e-4	1	0.007039450426238792	0.021471974709848424	0.2632335988776705	0.08157003817672548	0.9367800915893486	1	0.9535794783821125
ENSMUSG00000026080	Chst10	0.49810065691131006	0.1416571271280558	3.516241413402623	4.664307562761346e-4	1	0.007046734040342139	-0.3448706460198777	0.11680363210509846	-2.9525678251988547	0.0033478018628573525	1	0.00647643359854277
ENSMUSG00000001082	Mfsd10	0.12176787776842596	0.03506008457444257	3.4731199096190997	4.666456123228152e-4	1	0.007046734040342139	-0.019863225396309872	0.028358078648044613	-0.7004432720155217	0.48247113905879013	1	0.5618603294707248
ENSMUSG00000020634	Ubxn2a	-0.11289274781705574	0.03217085741982912	-3.509161920797055	4.6680535595992596e-4	1	0.007046734040342139	0.2804793014962507	0.026464786542074948	10.598207586157239	4.689357394537984e-26	9.386217760907228e-22	4.66649782584368e-25
ENSMUSG00000069792	Wfdc17	0.8492974129420091	0.24288066723290916	3.4967682797395305	4.6720193049555283e-4	1	0.007047939088445116	-0.0453550577367847	0.19994813778237397	-0.22683410928362688	0.8209136473745154	1	0.8612452057018408
ENSMUSG00000027184	Caprin1	-0.08574391172976077	0.024481925447762558	-3.502335300902448	4.717973513950885e-4	1	0.007112440966051569	0.25030663097024497	0.020128888299981055	12.435193997796716	2.4837840899903514e-35	5.165277393543935e-31	3.795788446866436e-34
ENSMUSG00000044726	Erich5	0.4641826097143471	0.13285144911014507	3.493997339310168	4.7266144760939506e-4	1	0.007120643108162931	-0.45416563966245327	0.10967743500769904	-4.140921417706132	3.774100724324831e-5	0.5029744035307702	9.409245402459587e-5
ENSMUSG00000097750	Gm4673	0.1329242466191079	0.03798389933712712	3.499489229353079	4.733468224432301e-4	1	0.007126143535983974	-0.11099153458736893	0.03133717844474692	-3.5418483761410418	4.020923980327574e-4	1	8.839994020973111e-4
ENSMUSG00000074748	Atxn7l3b	-0.08150233402654865	0.023351645185811624	-3.4902180714902764	4.744745313400733e-4	1	0.007138291275759277	-0.06948249706978497	0.019144654060096807	-3.6293420007315413	2.885820325094435e-4	1	6.469762020521538e-4
ENSMUSG00000033033	Calhm2	0.27074593272181613	0.07815192188268004	3.46435412206822	4.7642816295510057e-4	1	0.007162482106963816	-0.13966846409725545	0.0642756512407034	-2.1729606997557505	0.030741230099821316	1	0.05012994583738542
ENSMUSG00000027206	Cops2	-0.05863819637211355	0.016739895486336694	-3.5029009840578014	4.767262595125348e-4	1	0.007162482106963816	0.09615823128857827	0.0136568546482727	7.041023263782061	1.879603398904091e-12	3.2706978744330086e-8	8.62153272088537e-12
ENSMUSG00000087364	Gm13398	0.5480402486306196	0.15497078761203661	3.5364100362102904	4.780354008557857e-4	1	0.0071773047938205724	-0.16905329732479732	0.1276696267333966	-1.3241465621092423	0.18932550352967925	1	0.253562163177976
ENSMUSG00000028960	Ube4b	-0.06765875027717519	0.01937568407186159	-3.4919412406931665	4.854266370504752e-4	1	0.007278575326700411	0.20284863532519062	0.01595272213982116	12.715612642612271	6.359543245067718e-37	1.3282542021648434e-32	1.0359165208345666e-35
ENSMUSG00000024824	Rad9a	0.12267370297213584	0.03519859123832187	3.485187862819263	4.854346224809407e-4	1	0.007278575326700411	-0.16820422382883352	0.028924827063080617	-5.81521968867803	6.039129212511629e-9	9.648112829908578e-5	2.14111956831734e-8
ENSMUSG00000022367	Has2	1.2229428181211124	0.3572487183888339	3.423225207459097	4.890938070858579e-4	1	0.0073285025599107234	-0.17511507801045836	0.29318338990763576	-0.59728853693119	0.5627062364198147	1	0.6370275485412005
ENSMUSG00000024164	C3	0.6853693638553602	0.19599733560207763	3.4968300040916223	4.907055282747698e-4	1	0.00734770438064731	-0.4511899194779732	0.16117784422379608	-2.799329657564437	0.0075103941041222986	1	0.013712462395242904
ENSMUSG00000026482	Rgl1	-0.15503914464420762	0.044563078930613564	-3.4790940923451354	4.914690693090852e-4	1	0.007354188474241059	0.6251645158910851	0.036614255845867166	17.07434717566848	2.9092111235479794e-64	6.332479852626887e-60	1.334698076496208e-62
ENSMUSG00000023913	Pla2g7	0.43723402342067047	0.12696288777654333	3.4437939391407766	4.919280920009364e-4	1	0.007356110198328518	-0.4634475345935532	0.10419669119643438	-4.447814314178649	8.83367511460936e-6	0.1228852545193308	2.356529252789508e-5
ENSMUSG00000029570	Lfng	0.25476055644223605	0.0735500341075321	3.4637721047113232	4.932366091782391e-4	1	0.00737072383534251	-0.3901636687203181	0.06051034806936768	-6.447883397944487	1.3606061910138716e-10	2.2757499150898016e-6	5.47861895697605e-10
ENSMUSG00000009079	Ewsr1	0.047622952371602884	0.013673864522337327	3.482771991327475	4.939903197912626e-4	1	0.007376478474528859	2.2808907905390622e-4	0.011259180931819482	0.02025805255596395	0.9838433596330547	1	0.9877943594980191
ENSMUSG00000043144	Aqp6	0.18955927003362416	0.0542848168895886	3.4919390152715084	4.942847245302471e-4	1	0.007376478474528859	-0.42710992621188365	0.044675968328171355	-9.560171658161032	1.4524450740712315e-21	2.8228270014574386e-17	1.1472614605310249e-20
ENSMUSG00000020794	Ube2g1	-0.056481288271223506	0.016196135981328266	-3.487331073061996	4.948360518592795e-4	1	0.0073797566956573905	0.11708895006867501	0.013338157627749873	8.778495001818909	1.719598964771786e-18	3.2510738027975385e-14	1.1435384508409149e-17
ENSMUSG00000032757	Bet1	-0.0859468284635287	0.0246282907973203	-3.489760177465511	4.955234483645741e-4	1	0.007385058439089175	0.0691575544080333	0.020198073349009076	3.4239678811457623	6.174480117475168e-4	1	0.0013238423308338792
ENSMUSG00000027207	Galk2	-0.10030067654627156	0.0287344833054152	-3.490603101513548	4.973949840568676e-4	1	0.007407989150099974	0.07291859279265636	0.023608629025118736	3.0886415604681488	0.0020021457537786063	1	0.004004471475714855
ENSMUSG00000006369	Fbln1	0.34705461249244424	0.10221009027943548	3.3955024552235535	4.979260026619187e-4	1	0.007410937448314618	-0.4744477067660075	0.08291103663170668	-5.722370941681968	1.3096623251248313e-8	2.0712309671849208e-4	4.527154947390496e-8
ENSMUSG00000026811	St6galnac6	0.14531273291994273	0.04169363642249736	3.4852496780907747	4.996236232590106e-4	1	0.007429979235402817	-0.3700160745489819	0.034349443581713615	-10.772112615703763	5.056278808340065e-27	1.0171210450856874e-22	5.267193809193576e-26
ENSMUSG00000002395	Use1	0.10941496601361346	0.031467997664812786	3.4770234566262292	4.99873215378995e-4	1	0.007429979235402817	-0.02991909950062874	0.025902880009115625	-1.1550491485927337	0.24732110943818159	1	0.3192448083367548
ENSMUSG00000097819	Gm26813	0.45378345314313745	0.13104977234013676	3.462680209511182	5.018163698291751e-4	1	0.007450072491074147	0.06395457482530569	0.1080242054544318	0.5920392985652078	0.5554843708466938	1	0.6305842934396093
ENSMUSG00000042129	Rassf4	0.3581352299282216	0.1021604284013639	3.505615976091975	5.018946862666912e-4	1	0.007450072491074147	0.08845089001695314	0.08397474119671007	1.0533035143241196	0.2936845453184661	1	0.36984406689010074
ENSMUSG00000067878	Map7d3	0.29430914593935503	0.08443719189122678	3.4855392433998555	5.024102938086914e-4	1	0.007452754298358127	-0.3690085470631203	0.0696757869893948	-5.296080073258251	1.0821031227737852e-7	0.0016533453612860665	3.45301542877377e-7
ENSMUSG00000025140	Pycr1	0.41472030185565123	0.11930133552246461	3.476241904916134	5.033269178894774e-4	1	0.007461377248473526	0.06691987268072964	0.09828629485488903	0.6808667757751056	0.4971428675958926	1	0.5759020172259582
ENSMUSG00000032705	Exd2	-0.08580239592648786	0.024731646907507752	-3.469336120128779	5.039374398092511e-4	1	0.007465454043405889	-0.12007551147656038	0.020348701924304602	-5.9008929377033885	3.605907729485041e-9	5.800102582876688e-5	1.3010386393509267e-8
ENSMUSG00000020432	Tcn2	-0.12276810324814866	0.035225083626225784	-3.485246608662281	5.064006730227814e-4	1	0.0074922191440182995	0.2278626571937464	0.02893749501141205	7.87430484580246	3.772587612537593e-15	6.861582349683375e-11	2.0655474155160923e-14
ENSMUSG00000020897	Aurkb	0.6662480101841936	0.18993890250953546	3.5076964296492448	5.064175808998932e-4	1	0.0074922191440182995	-0.30398216686317714	0.15638931664517047	-1.9437527663918246	0.05380176701506995	1	0.08300812077744567
ENSMUSG00000091475	2810468N07Rik	0.4793656786010562	0.13978778872840777	3.4292385834388637	5.077048269264197e-4	1	0.007506272494312136	-0.3723451362635663	0.11489175454991779	-3.2408342767695397	0.0011677812601514751	1	0.0024101939355932168
ENSMUSG00000016552	Foxred2	0.24324650822089253	0.0693920293440726	3.505395511850244	5.098687614659616e-4	1	0.007533260166918401	0.7601056639660173	0.05700539575214603	13.333924866882487	4.757202477324536e-40	1.0015338375511346e-35	8.828399693323457e-39
ENSMUSG00000030870	Ubfd1	-0.0819988274772592	0.023595868944516332	-3.4751348920470964	5.106901584856536e-4	1	0.0075403893274480945	-0.016065173165539643	0.019428546438890765	-0.8268849764993975	0.4087270899247464	1	0.48932457107045796
ENSMUSG00000029373	Pf4	0.5350711017761914	0.15677762217641805	3.4129303299044103	5.122268231774415e-4	1	0.007558063025544596	0.1301158939223332	0.1284888312715617	1.0126630667791872	0.31273330673333677	1	0.39064889732911223
ENSMUSG00000096727	Psmb9	0.47873157303927183	0.13642732352447162	3.5090593340959257	5.127057301200203e-4	1	0.007560116103976523	-0.29674732424839495	0.11216199734330874	-2.6457029232468283	0.008956367928926033	1	0.0161471514168314
ENSMUSG00000097352	C920009B18Rik	0.9766902382300221	0.284671286673779	3.4309404704706554	5.146221519328799e-4	1	0.007583349339508947	0.007142430033079333	0.23462636150344765	0.030441720134565444	0.975984386751416	1	0.9826973433008623
ENSMUSG00000037234	Hook3	-0.09955870246586905	0.02856637346636554	-3.4851712130379764	5.156628778917293e-4	1	0.007593656317649814	-0.1159362430136564	0.023480159378025937	-4.9376258971289655	8.172922708922832e-7	0.012044436196139577	2.419902903476273e-6
ENSMUSG00000040522	Tlr8	0.7849708063807251	0.21998827046950564	3.5682393643325465	5.162922040995956e-4	1	0.007597895392473613	-0.3467080553626717	0.18113485452605999	-1.9140880217108662	0.06030189204425346	1	0.09193404589768303
ENSMUSG00000022186	Oxct1	-0.15190758707312427	0.04330503362262158	-3.5078505745293116	5.209992680319915e-4	1	0.0076620982901386935	0.17113207998320137	0.03505830055033891	4.8813569767159475	1.043709271171457e-6	0.015290340822661844	3.054929622840843e-6
ENSMUSG00000048138	Dmrt2	0.1958088520893895	0.05620480131003044	3.4838456417502717	5.270336443882082e-4	1	0.007741587919845183	-0.4515411580834616	0.04626043751237216	-9.760849277802416	1.9674303109211782e-22	3.848687174224009e-18	1.627408618896176e-21
ENSMUSG00000028718	Stil	0.60372465162923294	0.17267093789256305	3.4963883268235576	5.271001617260102e-4	1	0.007741587919845183	-0.20734346004638474	0.14225644261579298	-1.4575330033127507	0.14552813424493682	1	0.2016599132022202
ENSMUSG00000003812	Dnase2a	0.15404517737371076	0.04445425522776132	3.4652515621836533	5.274595104494786e-4	1	0.007741755651062894	-0.21618774631175036	0.03658804080120698	-5.908699716564728	3.2967530149897915e-9	5.3110691071485544e-5	1.1943349289569822e-8
ENSMUSG00000022125	Cln5	-0.1709645831127392	0.04879242429937895	-3.5039165519577455	5.289183660615301e-4	1	0.007758050470161573	0.005240871555153663	0.039861244698421235	0.13147787016699045	0.8953400542554475	1	0.9213009409562506
ENSMUSG00000024063	Lbh	0.2059908760017043	0.05986151148719852	3.441123868811027	5.320008586145979e-4	1	0.007798123257597772	-0.21139052760155097	0.049187137438268316	-4.297678999247597	1.945476714547958e-5	0.26460428794566776	5.0039073373490484e-5
ENSMUSG00000000861	Bcl11a	0.6340275216192123	0.18071666186659077	3.5084065579258326	5.330140440883152e-4	1	0.007807831135621529	-1.5649256972814802	0.149008984479658	-10.502223760172773	3.931260377713015e-24	7.775639901078572e-20	3.537180536372515e-23
ENSMUSG00000029923	Rab19	0.21340413105320832	0.061901098736655766	3.4475015049585465	5.339330956099135e-4	1	0.007816148230536965	-0.39913019816739004	0.051008788921200754	-7.824733866627831	5.097433346188273e-15	9.255409726674047e-11	2.7697921705991518e-14
ENSMUSG00000032827	Ppp1r9a	-0.19866553531230657	0.05734232429118153	-3.464553238258928	5.360893985560546e-4	1	0.00784255437690386	-0.25903248643739357	0.04712289578479356	-5.49695603641113	3.755419753120325e-8	5.836297838324297e-4	1.2451474434015848e-7
ENSMUSG00000006818	Sod2	-0.10113723142151379	0.029170147540320126	-3.4671484359726987	5.364893929711138e-4	1	0.00784324933180043	0.14797160827792707	0.023998006851508717	6.16599575096064	7.349490376171042e-10	1.2071537942860936e-5	2.8064786401266837e-9
ENSMUSG00000046031	Calhm6	0.7168790549532537	0.2107437537883158	3.4016621706061656	5.377006648235237e-4	1	0.007855796121463051	-0.4040976413024517	0.1733601697945223	-2.330971651570337	0.02113415393446013	1	0.03555273752140866
ENSMUSG00000073678	Pgap1	-0.13256442430743648	0.038020888354122484	-3.4866209088211098	5.422190849487209e-4	1	0.00791471796275508	-0.2666287872262748	0.03117454394019728	-8.552772664060583	1.249867885897753e-17	2.3432523124811077e-13	7.936875093924344e-17
ENSMUSG00000035949	Fbxw2	0.044923205946396295	0.012972478603043179	3.4629624238391794	5.426883977651894e-4	1	0.00791471796275508	0.07790779509846858	0.010642661006514412	7.320330418377597	2.499128364336249e-13	4.4139605170906835e-9	1.2115055606720234e-12
ENSMUSG00000034152	Exoc3	-0.05541487579377132	0.01597747775870612	-3.468311871914563	5.428007555239877e-4	1	0.00791471796275508	0.013398882758564884	0.012996257083443829	1.0309801254727384	0.3025879799245823	1	0.3795099003044857
ENSMUSG00000037148	Arhgap10	-0.15282454656053998	0.04436711072453065	-3.4445458373299713	5.452877202027626e-4	1	0.007945774107551849	0.4538603619728361	0.03651925811634002	12.42797322242871	2.0375814088302394e-35	4.237558055944249e-31	3.116029135936884e-34
ENSMUSG00000061436	Hipk2	-0.19889700036579164	0.057326252958962286	-3.469562200553637	5.460759513139355e-4	1	0.00795205235123454	-0.13238175758258006	0.04717400631754169	-2.8062436904654797	0.005120650396601652	1	0.009628969151929633
ENSMUSG00000020758	Itgb4	0.20176185494467858	0.058450245466946854	3.4518564179302427	5.467001250609385e-4	1	0.007955934913493095	-0.41595382752847254	0.04806675070989552	-8.653670601512907	5.279629416357162e-18	9.933622746876e-14	3.418010885753948e-17
ENSMUSG00000094065	Gm21541	0.7756466138185012	0.22151679788614215	3.501525036567102	5.475572858013331e-4	1	0.007963200762330367	-0.5215792931223111	0.18231488224387968	-2.8608706360274136	0.004905038748773738	1	0.009252459918528692
ENSMUSG00000021880	Rnase6	0.5330497905948156	0.15298183355375916	3.484399279392198	5.503614789360851e-4	1	0.00799806176678929	0.23601459273127193	0.1259875984425684	1.873316069588067	0.06344800078243942	1	0.09629503208580995
ENSMUSG00000079419	Ms4a6c	0.6835561350831246	0.19536185335381562	3.4989232716028287	5.506732563354993e-4	1	0.00799806176678929	0.0792429043374712	0.1607073259548485	0.4930883135952053	0.6269544296996492	1	0.6964039045151205
ENSMUSG00000026176	Ctdsp1	-0.06098324507814449	0.0176754771684785	-3.450161175105289	5.531570127233389e-4	1	0.008028895427336603	0.05898047062297412	0.014549600829983137	4.053751804752603	5.050740122312767e-5	0.6658390703244921	1.2392107008664833e-4
ENSMUSG00000037224	Zfyve28	0.4823182890503921	0.14149551425762605	3.40871787760153	5.543038006100198e-4	1	0.00803586911886991	-0.20928785006180795	0.1161867533059597	-1.8013056059039796	0.07278334248351151	1	0.10897666062853203
ENSMUSG00000031155	Pim2	0.14067328770265294	0.04076272054945179	3.4510279443196983	5.543597634922166e-4	1	0.00803586911886991	-0.13175644228902264	0.03357811984358019	-3.923877897356817	8.689058390893264e-5	1	2.080269402364601e-4
ENSMUSG00000043795	Prr33	0.43739040418613606	0.12710728344396113	3.441112045943237	5.553740800453548e-4	1	0.008045331155657023	-0.1833882596710944	0.10464219395196793	-1.7525268989990013	0.08055849864375324	1	0.11939699948858677
ENSMUSG00000018927	Ccl6	0.43197877216628927	0.1258500704733041	3.4324873283080333	5.566627338494635e-4	1	0.00805875243388706	-0.028164001086621326	0.10343415470379048	-0.27228917921044526	0.7855995211849415	1	0.8317255053473919
ENSMUSG00000003153	Slc2a3	0.29741805479432604	0.0869246034079887	3.4215635520172207	5.581613176724884e-4	1	0.008075193419720766	0.02742992842740058	0.07142497328520513	0.3840383435338628	0.7003371571094595	1	0.7599708404214868
ENSMUSG00000005447	Pafah1b3	0.16125254662653268	0.04657507182153688	3.4622071490175896	5.590341002251778e-4	1	0.008081642045185697	-0.28515546049897916	0.03825198607485122	-7.454657646820977	8.746284411059101e-14	1.555963996727414e-9	4.361577194766384e-13
ENSMUSG00000056429	Tgoln1	-0.13195396736086412	0.038038701983744885	-3.4689398028684613	5.595189271498769e-4	1	0.008081642045185697	-0.2823793631289546	0.03117575469196794	-9.057659258581037	1.4634034745881521e-19	2.7986128048023823e-15	1.0409907516963227e-18
ENSMUSG00000031951	Tmem231	-0.09226547114546937	0.026790259497358918	-3.443993185454782	5.596966604481219e-4	1	0.008081642045185697	-0.17464569010925293	0.02202943458963406	-7.9278335264869835	2.1109509696949388e-15	3.852274424596294e-11	1.1733892087604817e-14
ENSMUSG00000095209	Gm22398	1.0757708621744904	0.30610047974880894	3.5144370340656947	5.62712544718634e-4	1	0.008119920124860132	-0.17630867008785983	0.25074326564778243	-0.7031441886679404	0.48372672064183986	1	0.5631456736776843
ENSMUSG00000024989	Cep55	0.6919489474746205	0.1992226115683139	3.4732450399454264	5.637383682527711e-4	1	0.008129450701226448	-0.3058515375940434	0.16417375801537107	-1.8629745782234421	0.06515967433546122	1	0.0986237612161314
ENSMUSG00000033624	Pdpr	-0.1437390671578127	0.04143982316724038	-3.468621634260337	5.668346339500515e-4	1	0.008168806632138988	0.2651623714787075	0.03406972148267259	7.782933347828089	9.23079383157031e-15	1.669204448562859e-10	4.9267064894763967e-14
ENSMUSG00000041889	Shisa4	0.23990044174698288	0.06983686554151027	3.435154769430319	5.676328228253966e-4	1	0.008175014848341681	-0.2567128527098666	0.05739416363814467	-4.472804139605111	8.301000047135014e-6	0.11565783365673216	2.220285515672571e-5
ENSMUSG00000020275	Rel	0.30122005976303473	0.08790955205081558	3.426477017979984	5.711117855673369e-4	1	0.008219798409223036	-0.3431909988330623	0.072326275855935	-4.74503898855039	2.1288035945543623e-6	0.030699476637068457	6.048781609300104e-6
ENSMUSG00000097636	Mirt1	0.5111622680974045	0.14916419794341107	3.4268428694352373	5.717821476727906e-4	1	0.008224127063909027	0.33431895254585575	0.12301211548473188	2.7177725643402257	0.006926564475398971	1	0.01271536887567878
ENSMUSG00000023908	Pkmyt1	0.47358274890120033	0.13889881278994187	3.4095521724682016	5.728314480014222e-4	1	0.008233896995787885	-0.24998226536766108	0.11396343994839209	-2.193530359217523	0.02909889824391716	1	0.04766136067908728
ENSMUSG00000038037	Socs1	0.5080063668808048	0.14817353018271567	3.4284555834930317	5.787460707511748e-4	1	0.008313543460480561	-0.34269893447994776	0.12205123731297375	-2.8078284335714776	0.005482776151334791	1	0.010249286074380444
ENSMUSG00000050896	Rtn4rl2	0.5146162780229768	0.1496240068103293	3.4393964511011226	5.796649474415379e-4	1	0.00832137080356236	0.13336278577578714	0.12340407573892738	1.080700009114191	0.2826441311524156	1	0.3578850829267854
ENSMUSG00000089989	Gm45713	0.2307581813832827	0.06746403685833605	3.420462102910309	5.807123615787363e-4	1	0.008330205959394335	-0.2563830260196895	0.0555847254010239	-4.612472656291413	3.970036244225355e-6	0.056342754378046235	1.0959959859833544e-5
ENSMUSG00000041763	Tpp2	-0.0716020884507155	0.020789058681230613	-3.4442198441318266	5.811401441466188e-4	1	0.008330205959394335	0.13582204872805329	0.017126580580453816	7.930482567142676	2.2938247010999666e-15	4.183936254806339e-11	1.2721807932247098e-14
ENSMUSG00000039264	Gimap3	0.5289578047002921	0.1527754716661017	3.4623215293116907	5.814035259062245e-4	1	0.008330205959394335	-0.06760300024043579	0.12567840027560845	-0.5379046844341169	0.5937723828247379	1	0.6663319190151928
ENSMUSG00000074345	Tnfaip8l3	0.5770069925256472	0.16360612719206205	3.526805520237526	5.827285749694692e-4	1	0.008338819748825037	-0.06189838926710395	0.1340739831690957	-0.4616733821433273	0.6472671889317942	1	0.7140477055489021
ENSMUSG00000042379	Esm1	-0.3286256341163512	0.09545281761046773	-3.4428070573823777	5.827542451765284e-4	1	0.008338819748825037	0.05217356607556934	0.0785313249601868	0.6643663035358169	0.5059155763024251	1	0.584451871050582
ENSMUSG00000050982	Apol10a	0.9848114734481213	0.2839071180302729	3.4687804951164036	5.841928684889035e-4	1	0.008354033108448967	-2.734135886461234	0.2487016941680986	-10.993635952528813	2.59478691872358e-29	5.273904412305677e-25	2.9961911639085825e-28
ENSMUSG00000026991	Pkp4	-0.09761292830980556	0.028440086520990455	-3.4322303568859214	5.85488560080414e-4	1	0.008363504971804141	0.06024715264566807	0.02337350043171381	2.577583653834026	0.010086404368802303	1	0.01798770406429591
ENSMUSG00000020827	Mink1	-0.07456307685549149	0.02171273728625698	-3.4340707886096884	5.856069725437442e-4	1	0.008363504971804141	-0.09750717002842528	0.017834256569476223	-5.467408728172681	4.494986328010633e-8	6.965430813885277e-4	1.4804313319207312e-7
ENSMUSG00000039145	Camk1d	0.3290399528020555	0.09555920482171093	3.44330986654776	5.87500838567056e-4	1	0.008385170724153665	-0.2904665084601198	0.07866069731477685	-3.692651074497328	2.3165435294550504e-4	1	5.264124357869692e-4
ENSMUSG00000063838	Cdc42ep5	0.17867566514793431	0.05175162362389394	3.452561535971579	5.879989658396814e-4	1	0.008386900633909455	-0.2497996093235486	0.042359463410456995	-5.897138188532442	3.5440688774434797e-9	5.702052416918814e-5	1.2795566540969473e-8
ENSMUSG00000010830	Kdelr3	0.3910483626336977	0.1145509725263772	3.4137498269048088	5.904181932976869e-4	1	0.008416012312022313	-0.12029038747722601	0.09430824982144816	-1.2755022779552085	0.20354339865619003	1	0.2698268789692514
ENSMUSG00000047242	Taf9b	0.10376537723492331	0.030093097676795542	3.4481454302039385	5.914739833781095e-4	1	0.008425664279222993	0.02654931330177156	0.024663024320963935	1.0764824685026262	0.28182369402213236	1	0.3570494229736643
ENSMUSG00000021594	Srd5a1	0.2859892784541569	0.08331351216819124	3.4326878199158	5.928289606532169e-4	1	0.008439563150028617	0.6951687980547246	0.0682995738196461	10.178230392628922	8.352247502111608e-24	1.6489007018668736e-19	7.404217496792247e-23
ENSMUSG00000001143	Lman2l	-0.13914585520857678	0.040694716031974956	-3.4192609944555468	5.936894785709439e-4	1	0.008446409582916927	-0.11272292545584868	0.033465869426723444	-3.3682951432851835	7.520476012106487e-4	1	0.0015936963023369661
ENSMUSG00000090958	Lrrc32	0.25528214920489584	0.07481315913218549	3.4122626576140735	5.948400591838137e-4	1	0.008457371346261367	-0.08939355062691635	0.06142887482629332	-1.4552366599534938	0.14684899227466092	1	0.20330618013336738
ENSMUSG00000081058	Hist2h3c2	-0.4004558249974987	0.11892467418591664	-3.3673064714178693	6.006513458469822e-4	1	0.00853454220717829	0.20357654893738136	0.09696692822771524	2.099443105584475	0.03682610355563898	1	0.059112511197267556
ENSMUSG00000043740	B430306N03Rik	0.8703023222958495	0.24905305339000053	3.494445502472977	6.026438973790719e-4	1	0.008557389508986426	0.014327754950693602	0.2051815773782454	0.06982963643115415	0.945208615150868	1	0.9599195296997701
ENSMUSG00000026103	Gls	-0.17168191921222067	0.05011341341546107	-3.4258675973417745	6.042732536415999e-4	1	0.008572689053196947	0.13115395253011655	0.041193817509427945	3.1838261287655514	0.001469963943600236	1	0.0029930607347226257
ENSMUSG00000037989	Wnk2	-0.2849601485641869	0.08390321278818152	-3.396296030803792	6.044918935987601e-4	1	0.008572689053196947	0.4464223642457405	0.06836879295583655	6.529621848583917	6.154809159781864e-11	1.0386855938047874e-6	2.547445286724447e-10
ENSMUSG00000104846	Gm43020	1.2802859417551695	0.36542415320769106	3.5035613560757466	6.09081553386605e-4	1	0.008629183903322634	0.8115678462965242	0.2995921329685529	2.7089090699912055	0.008132562064903733	1	0.014755189049753176
ENSMUSG00000045284	Dcaf12l1	-0.22135436168550673	0.06479738129642856	-3.416100423455031	6.092511757727679e-4	1	0.008629183903322634	-0.0031543264928509352	0.05331481574178819	-0.059164163825076714	0.9527460798839983	1	0.9654436915947728
ENSMUSG00000001444	Tbx21	0.762449185883719	0.22326749168196341	3.414958353945234	6.097690068902922e-4	1	0.008631024282643696	-0.11826510067824707	0.1837597771918805	-0.6435853508613889	0.5241240403302853	1	0.6015207355781502
ENSMUSG00000042605	Atxn2	-0.08670928262559104	0.025267060182686884	-3.431712355876077	6.162264936732726e-4	1	0.008716882206436101	0.23253587612808393	0.020788368440439572	11.185864672079429	6.591165940252492e-29	1.338006685871256e-24	7.513321379946629e-28
ENSMUSG00000105843	Gm19439	1.041145135339145	0.3118895042222051	3.338185867894365	6.167799670101796e-4	1	0.008719168390053053	-0.015140297763496862	0.2547624508322559	-0.05942907879099396	0.9527741685195998	1	0.9654436915947728
ENSMUSG00000025330	Padi4	0.7462007080711811	0.21932970328102602	3.4021871953890255	6.182980904067271e-4	1	0.008735079879136562	-0.48992034368418164	0.18090366020767262	-2.7081836991123676	0.007035728659958657	1	0.012900865134960039
ENSMUSG00000100182	1810006J02Rik	0.7537139673616904	0.2197559187991173	3.4297777801865417	6.245085069592845e-4	1	0.008817220043369949	0.3088787711803386	0.1814858255309593	1.7019443269284278	0.08608477596666352	1	0.12681048328594702
ENSMUSG00000030865	Chp2	0.4903471257570787	0.14506197215805527	3.38025961223532	6.254872192714735e-4	1	0.008820546083007572	-0.5124266698827911	0.1196589751328598	-4.282392267808021	1.7096019555161554e-5	0.23333309905391808	4.4212404825883275e-5
ENSMUSG00000075590	Nrbp2	0.14688819063985378	0.04309196526985025	3.4087141238514285	6.255369070597253e-4	1	0.008820546083007572	-0.32684514399594644	0.03535530210770948	-9.244586370672689	1.958236006243931e-20	3.772541666028933e-16	1.4587448736167964e-19
ENSMUSG00000076535	Igkv1-88	1.9522270205242234	0.5271893320416565	3.7030852141180386	6.291127150165566e-4	1	0.008865349602174414	-0.019918665202731056	0.4349503553268754	-0.04579526136439574	1	1	1
ENSMUSG00000002012	Pnck	0.35081505498939025	0.10194984345503212	3.44105535722698	6.314548394429429e-4	1	0.008892722552180331	-0.1920994332578197	0.0837568407550994	-2.2935372385821995	0.021569378157971945	1	0.03621643777490445
ENSMUSG00000074221	Zfp568	-0.11352155180802287	0.03329705783545054	-3.409356837743163	6.328236904211585e-4	1	0.00890636302059532	-0.1862476525003342	0.027276218630461268	-6.828206468925219	8.996412454088002e-12	1.5457635878614006e-7	3.948307169939096e-11
ENSMUSG00000024937	Ehbp1l1	0.15963369439251454	0.04673592744162394	3.415652649493409	6.351949350228829e-4	1	0.00893408501845396	-0.18486632995411462	0.03840259366220986	-4.81390219577884	1.4541468339302835e-6	0.021149111552682044	4.197745355706115e-6
ENSMUSG00000025154	Arhgap19	0.24731127699187366	0.07231895524378025	3.4197296705713063	6.383548706989335e-4	1	0.00897072471019233	-0.40768908672026344	0.05956504276730717	-6.8444353899469945	8.682309271786966e-12	1.4924021407274617e-7	3.8157231603107206e-11
ENSMUSG00000031209	Heph	-0.177706494795623	0.052001682348814054	-3.4173220320760596	6.388237101937877e-4	1	0.00897072471019233	-0.5201057900188542	0.04275397174579858	-12.165087096731892	7.976013898284088e-34	1.648642072775321e-29	1.1218349257314743e-32
ENSMUSG00000078942	Naip6	0.5198238132578543	0.15365135919758477	3.383138398335922	6.394570915529359e-4	1	0.00897072471019233	-0.19915638026189864	0.12643813401119453	-1.5751290686104702	0.1178044897553159	1	0.1674075681150552
ENSMUSG00000029826	Zc3hav1	0.16992445488402608	0.04962542577220032	3.4241409970776737	6.395676831076575e-4	1	0.00897072471019233	-0.1887050067503572	0.04079338518109452	-4.625872697562043	3.962005829446138e-6	0.056232748737329044	1.0939147749225218e-5
ENSMUSG00000102439	Flg	0.7974765033466177	0.2248650484757281	3.5464671310743836	6.39815743790177e-4	1	0.00897072471019233	2.987591962554985	0.18472956622369333	16.172787191722417	1.3811534649297195e-48	2.9567733377215435e-44	3.641237647885212e-47
ENSMUSG00000018796	Acsl1	-0.20227398540388802	0.059116833463230996	-3.4215970909486675	6.411714583180915e-4	1	0.008984071863372705	-0.940605543355386	0.048568746899035904	-19.366477486246556	6.957474474951431e-83	1.5275135209755867e-78	5.212483654617652e-81
ENSMUSG00000072082	Ccnf	0.5918638907850623	0.17304900201964826	3.4202097895823815	6.423256945188766e-4	1	0.008993769965403032	-0.3257205768742484	0.1424212665163512	-2.2870220497361804	0.023348239126560127	1	0.038985567222353995
ENSMUSG00000040714	Klc3	0.2337996322721632	0.06870056120675302	3.403169175991848	6.428576290373765e-4	1	0.008993769965403032	-0.351618935809111	0.05651630960288874	-6.221548050107266	5.392266759193906e-10	8.888073299179315e-6	2.079794204521123e-9
ENSMUSG00000035246	Pcyt1b	0.6579623859278636	0.19385871947394107	3.394030393439736	6.430761770237843e-4	1	0.008993769965403032	-0.2779735707106049	0.1600197619271783	-1.7371202616655872	0.0861026416409688	1	0.12682840455138336
ENSMUSG00000042485	Mustn1	0.24868514779361187	0.07300356500568164	3.406479502394951	6.435950997071915e-4	1	0.00899537346958839	-0.4104656511970463	0.06019736392691872	-6.818664878670818	9.299006730256415e-12	1.5974763661907495e-7	4.0786950276943726e-11
ENSMUSG00000020493	Prr11	0.46616905529957003	0.13649511289940192	3.4152801913365254	6.455780190225051e-4	1	0.009017424043483843	-0.31866546839297166	0.11258004745508461	-2.830567898988564	0.0046513879728777826	1	0.008805345736302836
ENSMUSG00000051695	Pcbp1	-0.0667003269287511	0.019584608560075187	-3.4057523653919293	6.460144522089761e-4	1	0.009017859207090292	0.15670630702828867	0.01610835442773789	9.728262916691676	2.3072840502481366e-22	4.510278861425057e-18	1.8986456139819263e-21
ENSMUSG00000071647	Eml3	0.07375388859140862	0.021595858400651202	3.415186709558377	6.500052028156948e-4	1	0.009067878224358637	0.04320779317674763	0.01773861892012241	2.4358036762226956	0.014679466448825762	1	0.025452568218874934
ENSMUSG00000021555	Naa35	-0.05390819447254917	0.015811827166556096	-3.409358950404634	6.542251641026366e-4	1	0.009115719013807847	0.0685929918670326	0.013041849202485944	5.2594529197560345	1.4333188223996358e-07	0.002180077928869846	4.528937392390556e-7
ENSMUSG00000080972	Gm16061	0.5558941800112758	0.16294354391235746	3.41157536324529	6.542538881421568e-4	1	0.009115719013807847	0.11071085316894741	0.13462718967656975	0.8223513647942939	0.41377678395761486	1	0.49446547904623456
ENSMUSG00000083161	Gm11427	1.0849758271277405	0.3180128711939284	3.4117355786713053	6.551307781704321e-4	1	0.009122224621445735	0.2948518612846249	0.2617386537484973	1.1265124851140476	0.2773276153229213	1	0.35204424692776953
ENSMUSG00000020310	Madcam1	1.0389885427790502	0.31008534002370597	3.3506535416979717	6.575527321767248e-4	1	0.009150222541378551	-0.03358030189110053	0.2543215827744416	-0.13203874214986688	0.8959705959807674	1	0.921633641378997
ENSMUSG00000064267	Hvcn1	0.4200382708861619	0.12316912776679763	3.4102561128909	6.589663534911765e-4	1	0.009164162707207605	0.05072483038906347	0.10134165795146038	0.5005328649089118	0.6184430261923198	1	0.6887719993896246
ENSMUSG00000034807	Colgalt1	0.0970531006734726	0.02851134606967293	3.4040167881342667	6.617604997434683e-4	1	0.009192173242792336	-0.12033855679070611	0.0234722747090364	-5.126838292514442	2.794048462234597e-7	0.004202248887200834	8.620406590846093e-7
ENSMUSG00000026950	Neb	0.5259478779781912	0.1550302957690865	3.3925490199772086	6.618067293583805e-4	1	0.009192173242792336	0.2861693229094438	0.12726772230812697	2.248561675493817	0.02827357754670122	1	0.04641890164477598
ENSMUSG00000030978	Rrm1	0.12662332180488248	0.037257482104424866	3.398601157479832	6.628939966077154e-4	1	0.009196018721545431	-0.3211890235621524	0.030660241430949146	-10.47574998016607	8.965995376917123e-26	1.7911368964467335e-21	8.769334643155293e-25
[truncated: 20,656 more rows]
