# Supplementary material for: Proteomic and transcriptomic profiling reveal different aspects of aging in the kidney
Source: bioRxiv preprint, doi:10.1101/2020.08.27.270504, version 1 (2020-08-27)
Supplement: Supplemental Table 2 [file 270504_file03.csv]

gene.id	symbol	b.age.prot	se.age.prot	z.age.prot	p.age.prot	padj.age.prot	q.age.prot	b.sex.prot	se.sex.prot	z.sex.prot	p.sex.prot	padj.sex.prot	q.sex.prot
ENSMUSG00000035783	Acta2	0.14776144231644062	0.011404145145887718	12.95681880809126	1.4014513486428339e-27	9.221549874069847e-24	9.221549874069847e-24	-0.5030215719944543	0.09333198324657375	-5.389594804446849	2.1766761585191328e-7	0.0010519875874122969	8.193666546370649e-7
ENSMUSG00000024300	Myo1f	0.14059201945501537	0.011885603689838998	11.828765548964709	2.2160516448137153e-24	1.4579403771229433e-20	7.290809911437124e-21	-0.28402195525503515	0.09664548910569254	-2.938801985309689	0.0037235867889342214	1	0.007227492941353149
ENSMUSG00000051043	Gprc5c	0.14269533285296018	0.012813164333206353	11.136619272348959	2.2896377794253494e-22	1.5061237313059949e-18	5.021938862872933e-19	0.22880091062390268	0.10399714172918155	2.2000692213226594	0.029067591525165293	1	0.04666132037950418
ENSMUSG00000058773	Hist1h1b	-0.12127743592284945	0.011530544390436813	-10.51792801937733	1.6671076850872202e-20	1.0964567244818648e-16	2.7423921419684773e-17	-0.41032342748539996	0.09426014716817818	-4.353095553238467	2.2399251033707266e-5	0.0955776041608289	6.369363517795757e-5
ENSMUSG00000039043	Arpin	0.12935257596439081	0.012352963702946402	10.471379911327507	1.0389365986193732e-19	6.832047072520998e-16	1.3672405637830952e-16	-0.5461566176501015	0.10345521975390039	-5.279159610789099	3.6754732925971706e-7	0.0017598166124955252	1.348835151438337e-6
ENSMUSG00000032220	Myo1e	0.13040734326976786	0.012811371775359686	10.179030439236987	1.4200189412045108e-19	9.336624538419658e-16	1.5572874388542804e-16	-0.44585693185116343	0.1043954629150791	-4.27084587204568	3.138509850180867e-5	0.13197433920010546	8.691664484086745e-5
ENSMUSG00000028165	Cisd2	-0.12656775591722685	0.012568885529539102	-10.069926694755097	1.1991248980940317e-18	7.883047080070164e-15	1.1271774042083897e-15	0.6189385930375966	0.10516720380135687	5.885281443886892	1.880234325167863e-8	9.530907794275898e-5	8.182501229897182e-8
ENSMUSG00000030769	Slc5a11	0.13500750267738537	0.01373425907337825	9.82998077698102	1.5058852091537051e-18	9.898183479767305e-15	1.2385905845289224e-15	0.30162182188904774	0.11227370302850946	2.686486806375821	0.00789279081899281	1	0.014310984731047862
ENSMUSG00000028228	Cpne3	-0.11481864368261845	0.011672273400498768	-9.836870654324471	3.640998018271277e-18	2.3928638976078832e-14	2.6219657545826175e-15	-0.6558923071084636	0.09721727457935853	-6.746664211133159	1.9632227574244198e-10	1.0652446681784902e-6	1.118442055744821e-9
ENSMUSG00000013584	Aldh1a2	0.11360975873084317	0.011763511366291753	9.657810086909171	3.984750386903674e-18	2.618379479234404e-14	2.6219657545826175e-15	-0.3819456697909311	0.11557107344529038	-3.3048552583682493	0.0011411334515950386	1	0.002423711462716383
ENSMUSG00000042459	Bpifa2	0.11300953961344708	0.011801905869889216	9.57553304180928	6.790522695224735e-18	4.461373410762651e-14	3.692406404588371e-15	0.2615179276634	0.11594828173429438	2.255470488667449	0.02527499679191242	1	0.04119630391151442
ENSMUSG00000020238	Ncln	-0.11892097363037106	0.012344843036038111	-9.633251170809292	6.857896231610563e-18	4.504952034544979e-14	3.692406404588371e-15	0.7630687364852846	0.10167433929666506	7.505027736239378	2.665960914148765e-12	1.508933877408201e-8	1.9046713154287593e-11
ENSMUSG00000030781	Slc5a2	0.12547231672669126	0.01311781415911207	9.565032344930273	7.29502785101046e-18	4.7913742925436706e-14	3.692406404588371e-15	0.4900193033219118	0.10632777449157285	4.608572930873757	7.631098015355554e-6	0.033775239815963684	2.3300522014403502e-5
ENSMUSG00000022132	Cldn10	-0.09930814734594941	0.010396834675468307	-9.551767479795599	7.918735016834417e-18	5.200233285555162e-14	3.721805457912176e-15	-0.9173127013043555	0.10214410531537278	-8.980574047539276	3.0624077328905105e-16	1.8316260650418142e-12	3.35844048040326e-15
ENSMUSG00000021186	Fbln5	-0.1283188534576642	0.01324648418989192	-9.687012162486202	1.214770482411467e-17	7.976182987513692e-14	5.328793182844968e-15	0.01954331778948462	0.11082129680988095	0.17634983845218924	0.8602156435259349	1	0.8896917532852329
ENSMUSG00000004270	Lpcat3	-0.1267781853957059	0.013153864452579196	-9.63809425380291	1.506050648549465e-17	9.887222507727237e-14	6.1936332921596746e-15	0.556340443008457	0.10983592183016389	5.0651957368620275	9.983600092629215e-7	0.004649362563137425	3.41185788803406e-6
ENSMUSG00000021565	Slc6a19	0.12663856874516785	0.013430950590943262	9.428861188020644	1.7706623571515068e-17	1.162262771234249e-13	6.8535048882687735e-15	0.396243731602319	0.10901718769682509	3.634690455456125	3.6246726882786524e-4	1	8.412820560449218e-4
ENSMUSG00000030744	Rps3	-0.11221240846377711	0.011922292973297659	-9.411982134233664	2.4306660663841195e-17	1.5952461393678975e-13	8.616254851952875e-15	0.6777268709414401	0.09779685795895378	6.929945246562913	7.118317690871732e-11	3.9100919075958424e-7	4.305011985839706e-10
ENSMUSG00000043998	Mgat2	-0.1319658402540249	0.013816647631786711	-9.551219931991538	2.487976325031985e-17	1.6326100644859885e-13	8.616254851952875e-15	0.15219757476939297	0.11525247779425778	1.3205579409849	0.1883138869019711	1	0.24658813449054123
ENSMUSG00000031483	Erlin2	-0.12806763538826257	0.013449571587457678	-9.52206057683587	3.56396133263466e-17	2.3383150303416006e-13	1.1725432784368031e-14	0.43698249909161596	0.1125167853955149	3.88370941771533	1.4399807485244493e-4	0.5654870164122372	3.5687658475671853e-4
ENSMUSG00000025816	Sec61a2	-0.11721582925720024	0.01276571613037005	-9.18208019512043	1.2956793492803506e-16	8.4996565312791e-13	4.059795294411765e-14	0.6376897999457807	0.10538424905973003	6.051092128429446	8.052079142534127e-9	4.141184303005301e-5	3.6844701500608175e-8
ENSMUSG00000030835	Nomo1	-0.11262467372811635	0.012372767795286878	-9.102625668851406	1.6456796832587027e-16	1.079401304249383e-12	4.922078325382847e-14	0.8197613656700562	0.10133454922877919	8.089653251620154	8.332410695848032e-14	4.831964962522274e-10	7.007038070167657e-13
ENSMUSG00000031232	Magt1	-0.11638168845360897	0.012816357137039004	-9.08071515245688	2.8941381678798855e-16	1.897975810495629e-12	8.279751802021586e-14	0.7134759796998391	0.10622395001812404	6.716714823522427	2.3139185702918574e-10	1.2522927302419532e-6	1.3024451832780516e-9
ENSMUSG00000041231	Ublcp1	0.10842939257454445	0.01212198657239689	8.944853380835301	3.8386206624953227e-16	2.516983568398183e-12	1.0327121487422245e-13	0.19596321472658149	0.11909292700440777	1.6454647614742786	0.10157194282973918	1	0.14299173808722374
ENSMUSG00000035441	Myo1d	0.11280414830348402	0.012614606802556189	8.942343591765834	3.9236783766801845e-16	2.572363543751529e-12	1.0327121487422245e-13	-0.5545651353918888	0.10232412755361095	-5.419690826108769	1.8848761124999802e-7	9.151073526187404e-4	7.185680660631442e-7
ENSMUSG00000006216	Clcnkb	-0.09666604634761762	0.010853853444232318	-8.906149953497435	4.901343833408572e-16	3.212830882799319e-12	1.2404170163010926e-13	-0.8526507855374788	0.10663410392599611	-7.996042111717064	1.3539942571554678e-13	7.828794794872915e-10	1.1150540941280322e-12
ENSMUSG00000027282	Mtch2	-0.1131621641703157	0.01269277112936368	-8.915481341070144	6.652636430410845e-16	4.3601379164912685e-12	1.6212721374853098e-13	0.7176939784359724	0.1047333470488556	6.852583237898291	1.0927365202857748e-10	5.970712346841474e-7	6.437069206338762e-10
ENSMUSG00000024353	Mzb1	0.10723317537639929	0.012260302089987612	8.74637301669519	1.3385282925105861e-15	8.77137590082187e-12	3.043318467909468e-13	0.10946136914392919	0.12045181316895098	0.908756508217887	0.36466100603711127	1	0.43547539377934524
ENSMUSG00000020372	Rack1	-0.09983939428002801	0.01139774838590468	-8.75957170659224	1.3412801758263611e-15	8.788067712014317e-12	3.043318467909468e-13	0.920667737838946	0.0931010974028426	9.888903176460687	1.0331711175866456e-18	6.3488365175699375e-15	1.559235310486268e-17
ENSMUSG00000030057	Cnbp	0.12242305300787601	0.01364068512809592	8.974846340798486	1.5428961513046357e-15	1.0107512687196669e-11	3.322990712432538e-13	0.06802887880546307	0.11505924539882383	0.5912508687994444	0.5550875225744036	1	0.619588786859979
ENSMUSG00000032261	Sh3bgrl2	0.10224367218334444	0.011723368256292775	8.72135634982403	1.5655427368603144e-15	1.025430492643506e-11	3.322990712432538e-13	-0.6504503720471895	0.11517668590490782	-5.647413510267298	6.054716364451051e-8	3.0055612033135014e-4	2.4638239751445835e-7
ENSMUSG00000051627	Hist1h1e	-0.11151299809266588	0.012782526065701454	-8.723862366444273	1.6889334142489752e-15	1.1060824929916539e-11	3.4068705864982373e-13	0.030669409854438227	0.1044597533917104	0.29360025137558915	0.7693993393421276	1	0.8128178123123071
ENSMUSG00000025792	Slc25a10	-0.11413706944250031	0.01309131838946294	-8.718531323351511	1.708612908122216e-15	1.1187997322384271e-11	3.4068705864982373e-13	0.636249004958897	0.10685400067526415	5.954377009172513	1.325254008593061e-8	6.766746967876169e-5	5.911980594265994e-8
ENSMUSG00000060002	Chpt1	-0.117277296423698	0.013015151412970789	-9.010828433914371	1.7604481760016954e-15	1.1525654208283099e-11	3.4069849994385753e-13	0.6957617219085631	0.11022700635898573	6.31208035935056	2.0523284760465626e-9	1.078293381314864e-5	1.0176579783260272e-8
ENSMUSG00000061904	Slc25a3	-0.12032844897166177	0.013849650633911838	-8.68819381458108	2.7204606276362248e-15	1.7808135268506727e-11	4.994549343025202e-13	0.1665561735760387	0.11429239592015739	1.4572813198560632	0.1467678615853637	1	0.19830236739870494
ENSMUSG00000030057	Cnbp	0.12251955618978941	0.014137546676081312	8.66625299261256	2.7325801876733627e-15	1.788473732832216e-11	4.994549343025202e-13	-0.05308028151989687	0.1161516102389292	-0.45699135303168237	0.6482245056465978	1	0.7048946037274193
ENSMUSG00000005374	Tbl2	-0.11794430781478532	0.013555876803688353	-8.70060340048933	3.1156696949207187e-15	2.0388942483561185e-11	5.540839619615765e-13	0.4430628442424645	0.11250809367244681	3.9380530749404246	1.1699453290091176e-4	0.4645852901495206	2.949517342865898e-4
ENSMUSG00000003528	Slc25a1	-0.11905228714455417	0.013836612109398936	-8.604150076859083	3.737307876536858e-15	2.4453205436180666e-11	6.471443638845402e-13	0.33371213085662876	0.11336921252564239	2.9435869176664533	0.0036690041351615087	1	0.00712575183275169
ENSMUSG00000032796	Lama1	-0.11108816240469693	0.012566037183581768	-8.840349648960123	5.310681491096856e-15	3.4742478314755636e-11	8.960072874722388e-13	-0.6163942727424621	0.10685070502375708	-5.768743150598899	3.376534829071254e-8	1.6933322167792339e-4	1.4187483509124424e-7
ENSMUSG00000033770	Clcnka	-0.09405604193370616	0.011063300729074197	-8.50162571162223	6.1504449657306056e-15	4.023006052084389e-11	1.0117481968626847e-12	-0.8352172139453681	0.10869182689540978	-7.684268797405231	8.72632332743824e-13	4.981857987634491e-9	6.584771501667846e-12
ENSMUSG00000027962	Vcam1	0.10399220431921552	0.012246897228261245	8.491310278920324	6.556195525469438e-15	4.2877518736570124e-11	1.0521894282338758e-12	-0.36885285829951064	0.12032011658526415	-3.065595918352732	0.0024976371332550242	1	0.00500128299317614
ENSMUSG00000025935	Tram1	-0.11788475805813377	0.01385828755476945	-8.506444796461357	8.200690220399201e-15	5.362431335119037e-11	1.2847748011958747e-12	0.3950495690744115	0.11433421948288193	3.455217264447746	6.847013551218946e-4	1	0.0015143982913284257
ENSMUSG00000034993	Vat1	0.10449074223620644	0.01238161045436163	8.439188312486268	9.049616961248763e-15	5.916639569264441e-11	1.3848018512794618e-12	-0.22830761482005094	0.12164361189741323	-1.876856591635832	0.06211210814455366	1	0.09259122600615384
ENSMUSG00000022241	Tars	0.10286309471389882	0.012222375521154818	8.415965827253515	1.0444325276116487e-14	6.827455432997347e-11	1.56190137083742e-12	0.31197183514730586	0.12007920212318257	2.5980505335742596	0.01013049323609944	1	0.01795760923855989
ENSMUSG00000001247	Lsr	-0.10081132909345676	0.011986084090707982	-8.41069763323362	1.0789275683550494e-14	7.051870586768603e-11	1.577631866616939e-12	-0.46112806744099544	0.11775774780462626	-3.9159042698919504	1.2655815371496006e-4	0.500790614250097	3.173600043614471e-4
ENSMUSG00000031015	Swap70	0.10446862962267649	0.012447454088004049	8.392770833624184	1.20499403233777e-14	7.874636001327327e-11	1.7236653766918536e-12	-0.00934203813611013	0.12229049522864356	-0.07639218500704859	0.9391896375419204	1	0.9508951861864651
ENSMUSG00000021771	Vdac2	-0.11106531921842248	0.013251407337938614	-8.381398019547996	1.5755715324064848e-14	1.0294784392743972e-10	2.205800145369079e-12	0.4944251505280743	0.10893020923784129	4.538916742999478	1.0272032242953036e-5	0.045094221546563826	3.084891472324554e-5
ENSMUSG00000027822	Slc33a1	-0.11116758998602483	0.012744913362081367	-8.722506526938846	2.013669659549901e-14	1.3155303885839503e-10	2.7604054916329895e-12	0.7485242161737179	0.109275375301651	6.849889228084936	1.1031433643040963e-10	6.024265912464669e-7	6.480967265286566e-10
ENSMUSG00000028975	Pex14	-0.11125820650704192	0.013013282500424465	-8.549588199857562	2.0641724328178872e-14	1.3483174331166438e-10	2.7718886954983053e-12	0.7336209952115725	0.11011640799010455	6.662231438547272	3.1077284503774695e-10	1.6766194989786449e-6	1.7241866107490513e-9
ENSMUSG00000031482	Slc25a15	-0.11180135581771196	0.013464658456908396	-8.303319105754914	2.2200573987383104e-14	1.4499194871159905e-10	2.9215955367396165e-12	0.5766424410787161	0.10991073186461771	5.246461662988416	4.2982004436264e-7	0.002051531071742881	1.5642787012755374e-6
ENSMUSG00000004319	Clcn3	-0.10151561608829374	0.012293623178709814	-8.257583188664771	2.7637142009766855e-14	1.8047053732377756e-10	3.565733224005214e-12	0.4099873460872054	0.12077917749683573	3.3945201034172183	8.411610406709191e-4	1	0.0018290943977576494
ENSMUSG00000040018	Cox15	-0.11421170677665118	0.013784119168495161	-8.28574574701097	2.9788446652648136e-14	1.9448876819513967e-10	3.769384211046629e-12	0.49863698396601536	0.1135508734581336	4.391309100320251	1.911302358518244e-5	0.08199358979645191	5.487072215990421e-5
ENSMUSG00000002844	Adprh	0.09658478195737548	0.011725516678525874	8.23714507474634	3.131670306151772e-14	2.044354375855877e-10	3.887998229146917e-12	-0.7314512025977422	0.11519779316242316	-6.349524435476228	1.626991314169613e-9	8.5774982083022e-6	8.1784590124034e-9
ENSMUSG00000003316	Glg1	-0.10985862533661422	0.012813183887396534	-8.573874089536384	3.942263888639396e-14	2.573115640114934e-10	4.80372155319393e-12	0.7928962947427242	0.10947224524517343	7.242897895872676	1.2062317274934736e-11	6.741629124961024e-8	8.001012869865984e-11
ENSMUSG00000030884	Uqcrc2	-0.11620359059839212	0.014150600463937922	-8.21191940897003	4.862764556749203e-14	3.17344014973453e-10	5.817634687892683e-12	0.04780237821165757	0.1167590988832537	0.40941030436912423	0.6827216938209484	1	0.7357203972063282
ENSMUSG00000014313	Cox6c	-0.11464878788812596	0.014065849367094315	-8.150861344806922	5.89010626481065e-14	3.843294337788949e-10	6.920874861152514e-12	0.2605631360750024	0.11517874305295256	2.2622502136111216	0.024868803999789326	1	0.040614725817476736
ENSMUSG00000037089	Slc35b2	-0.11850267453538983	0.014379818232506433	-8.240902118464021	7.917096888652127e-14	5.165114010156648e-10	9.077351449277351e-12	0.1376496152204125	0.12054707707610174	1.1418743495001034	0.2550116884786979	1	0.3215747240685765
ENSMUSG00000023272	Creld2	0.11826986171449293	0.013185328962583218	8.969807431434912	8.001312827630492e-14	5.219256357463369e-10	9.077351449277351e-12	0.13940243994390444	0.11627082379120603	1.198946007248019	0.2321074472888897	1	0.29696033504975583
ENSMUSG00000036123	Slc9a3	0.10871566258118708	0.013489376080794799	8.05935440824195	9.262191194772588e-14	6.040801097230682e-10	1.0329697976542988e-11	0.6084831531126002	0.10936670833377707	5.563696323890135	9.375630219935494e-8	4.610934942164276e-4	3.709660062969065e-7
ENSMUSG00000019802	Sec63	-0.1065119307021708	0.013116499180621634	-8.120454187923247	9.63102884964593e-14	6.280393912854112e-10	1.0562028305111705e-11	0.7754335343205833	0.10873082095022991	7.131681040792726	2.2790920607655348e-11	1.2651240029309482e-7	1.4559636660036133e-10
ENSMUSG00000033720	Sfxn5	-0.11226798696211877	0.01389557844544171	-8.079403632091836	1.0260249712199394e-13	6.689682812354005e-10	1.1049626200968817e-11	0.5638593831575486	0.11444830567457101	4.926760425452337	1.8760590126113906e-6	0.008611110867886284	6.200134757902034e-6
ENSMUSG00000059534	Uqcr10	-0.1137990090023604	0.014112651834252378	-8.063616274169137	1.0411501891490375e-13	6.787258083062576e-10	1.1049626200968817e-11	0.24543237810943416	0.11584062993716511	2.118707212163495	0.03547690465860652	1	0.0559803435620218
ENSMUSG00000022337	Emc2	-0.10756450337345459	0.013185111824572592	-8.158027387601727	1.1488217394749537e-13	7.488020097897748e-10	1.1998804834516183e-11	0.7274280941123403	0.11040374892992742	6.588798851151644	4.6489849644034074e-10	2.49696982438107e-6	2.5281257079152416e-9
ENSMUSG00000041084	Ostc	-0.11283480666402974	0.013764906284123723	-8.197281139078443	1.8002613816625262e-13	1.1732303424294683e-9	1.8508937330217848e-11	0.3878524355282588	0.11685664339011387	3.3190448080341777	0.0010912590643240773	1	0.0023283024135059755
ENSMUSG00000001211	Agpat3	-0.11437501847273275	0.013797472188569991	-8.289563255469544	1.9735728602252368e-13	1.2859800757227643e-9	1.9978629877357012e-11	0.38350012194100686	0.11813521769959244	3.2462810786552594	0.0013921760666675462	1	0.0029164337849960057
ENSMUSG00000028544	Slc5a9	0.11636175640979586	0.014572052753002152	7.985268677113653	2.375005066418318e-13	1.5473158007715342e-9	2.3678080813685658e-11	-0.16530311469375591	0.12108207884011184	-1.3652153669416074	0.17387737596205866	1	0.23029652452301652
ENSMUSG00000015112	Slc25a13	-0.11097156232548483	0.014019086572972666	-7.9157484154086335	2.4128957324030354e-13	1.5717602800873372e-9	2.3696796894346226e-11	0.4409322074054799	0.11478361875308353	3.841421033727731	1.6899582776239893e-4	0.6590837282733558	4.147678279286031e-4
ENSMUSG00000021474	Sfxn1	-0.11074858825943515	0.013978192451098421	-7.92295489183456	2.4835991300536683e-13	1.6175681134039542e-9	2.4032473934931084e-11	0.4855250443461515	0.1148949446010435	4.225817297985293	3.766931263101001e-5	0.15700569504604972	1.0272029718692327e-4
ENSMUSG00000054808	Actn4	0.10644263330445645	0.012962565290307303	8.211540765318144	3.14357930008207e-13	2.0470988402134443e-9	2.997790115150728e-11	-0.7243873067935479	0.11121579118281871	-6.513349400201503	6.968130922022556e-10	3.715407407622427e-6	3.670960886061522e-9
ENSMUSG00000039428	Tmem135	-0.11465165863872165	0.013561685222983507	-8.45408640250823	4.117953070169358e-13	2.681199243987269e-9	3.870875885959197e-11	0.2798970614009574	0.11849447717679769	2.362110606921719	0.01922803794016213	1	0.03216895236365797
ENSMUSG00000024248	Cox7a2l	-0.11305474417384705	0.014333289463004223	-7.887564432829856	4.357926125610683e-13	2.8370099077725545e-9	4.0387540713406046e-11	0.27746352015636294	0.11931972230680661	2.325378527473618	0.021157637351804957	1	0.03509948615343577
ENSMUSG00000006442	Srm	0.09776888794823041	0.01254618821235234	7.792716504282322	4.582265948224715e-13	2.982596905699467e-9	4.1876819360164753e-11	0.247422239657622	0.12326051246085455	2.007311463484294	0.046172008959601496	1	0.07075243112528333
ENSMUSG00000032114	Slc37a4	-0.09941964069155548	0.012304255283698294	-8.080102240992588	5.003366498260472e-13	3.256190917067915e-9	4.50988377514437e-11	1.0114663317345245	0.10511409853632334	9.622556306136243	5.644411355799285e-18	3.445348691579884e-14	7.786211052653941e-17
ENSMUSG00000047879	Usp14	0.10676428622848541	0.01294337607137155	8.248565570510545	5.597422120225674e-13	3.642242573630846e-9	4.977167236633099e-11	0.5306103405436575	0.11221045626369772	4.728706737424794	4.516000486936038e-6	0.020276842186342812	1.4210798742676205e-5
ENSMUSG00000044894	Uqcrq	-0.11178942888515644	0.014429732178835935	-7.747158956222197	6.84193166686063e-13	4.451360742459526e-9	5.925436330484309e-11	0.16084442548167568	0.11844411684863793	1.3579773294035529	0.17615863992431857	1	0.23280254081181284
ENSMUSG00000052428	Tmco1	-0.09688437647474868	0.012333003969958227	-7.8556997719896815	6.867391625142368e-13	4.467238252155111e-9	5.925436330484309e-11	1.0019813847733132	0.10344282999813736	9.686329973680683	3.769561622075662e-18	2.3065947565480974e-14	5.3687695829562454e-17
ENSMUSG00000036918	Ttc7	-0.09781721718877774	0.012668486660510122	-7.721302457829555	7.006667824660255e-13	4.55713675315903e-9	5.925436330484309e-11	0.23049022734670946	0.12446203830583222	1.8518917935470516	0.06563492071144744	1	0.09716035506891432
ENSMUSG00000038462	Uqcrfs1	-0.11138698901999053	0.01431821104482665	-7.779392877452805	7.024073461668328e-13	4.567754972122914e-9	5.925436330484309e-11	0.21872056410228355	0.11862989817538662	1.8437220925446582	0.06685486436123612	1	0.0987219496178038
ENSMUSG00000025885	Myo5b	0.10831041002862013	0.014114186721266811	7.673868297733473	1.0146636729302036e-12	6.5973432013921835e-9	8.451249326431316e-11	-0.031200546680379672	0.11560140913240484	-0.26989763286227697	0.7875459324120558	1	0.8281532883041152
ENSMUSG00000062929	Cfl2	0.09745251555804232	0.012740932448604024	7.648774212653473	1.0764176976344707e-12	6.997791452321694e-9	8.853535563043521e-11	0.031881489410885186	0.1251737847594119	0.25469781449975687	0.7992394050645525	1	0.8378198638401713
ENSMUSG00000027593	Raly	0.10914412087225506	0.014121531425831897	7.728915340768389	1.2102048391659153e-12	7.86633145457845e-9	9.83104671816262e-11	0.07870541060780815	0.11795477108162554	0.6672507596436558	0.505459176193981	1	0.5712678425552035
ENSMUSG00000005481	Ddx39	0.11157752149714158	0.013263384126694248	8.412447413973151	1.315609646928024e-12	8.550147095385228e-9	1.0556965215593168e-10	-0.31492124713154473	0.11746088614846042	-2.6810733126388255	0.008012488705980217	1	0.014500048318303033
ENSMUSG00000028234	Rps20	-0.10881075229283663	0.013514115096472362	-8.05163723381636	1.4642536445001816e-12	9.51472018196218e-9	1.1608179494953247e-10	0.17633994008341183	0.11706123194200703	1.506390605651339	0.13370170563786052	1	0.18282569058543688
ENSMUSG00000032231	Anxa2	-0.09663473296953239	0.012541193820791462	-7.705385496022409	1.5280226595786011e-12	9.927563219282172e-9	1.1969510833365708e-10	-0.7111418406897136	0.10497274846723727	-6.774537687861589	1.683079660765478e-10	9.159319513885731e-7	9.723146767196528e-10
ENSMUSG00000011034	Slc5a1	0.11132605240973704	0.014652285761584885	7.597862491981272	1.8358241105639253e-12	1.1925513422223258e-8	1.4211438408836032e-10	-0.44573133536754217	0.12089117442885018	-3.6870461179105742	2.9966495349358074e-4	1	7.057249083707091e-4
ENSMUSG00000000154	Slc22a18	-0.09712602882526387	0.012464292023338206	-7.792342207917192	2.367720587490169e-12	1.5378345215748647e-8	1.8115815657773618e-10	0.9717445581626655	0.10656623093834483	9.118691255252143	1.4080919679072257e-16	8.464040819090334e-13	1.6254816050578149e-15
ENSMUSG00000000876	Pxmp4	-0.10442975967836057	0.012565245672377894	-8.311000230415543	2.6178312453298593e-12	1.7000196107172107e-8	1.9799229418701693e-10	0.7420844129530625	0.11190609104450519	6.631313863495907	3.6546958826978105e-10	1.968053732832771e-6	2.0106938886414377e-9
ENSMUSG00000016256	Ctsz	0.0957605154212487	0.012781485999486236	7.492126926798487	2.702465060254e-12	1.7547105636229223e-8	2.0207068291444682e-10	-0.18927545346194496	0.12557220469216304	-1.507303737526539	0.13343853540601538	1	0.1825037545149826
ENSMUSG00000024807	Syvn1	-0.10738133184243734	0.01408158666895514	-7.625655713867441	3.0064242371197757e-12	1.9517706147381584e-8	2.2227271326121488e-10	0.43313330768825664	0.11866158017369015	3.6501562431096946	3.424607823128021e-4	1	7.979433242274213e-4
ENSMUSG00000006273	Atp6v1b2	0.11089734326973527	0.014829002452866804	7.478408856038468	3.132638395460433e-12	2.033395582493367e-8	2.288616806691232e-10	0.25805592554079226	0.12128525577663664	2.1276776298022364	0.034716578098181176	1	0.05488589233205962
ENSMUSG00000006342	Susd2	0.10990645022940913	0.014326774541289635	7.671402234512711	3.1651083496793636e-12	2.054155318941907e-8	2.288616806691232e-10	0.15897475300847885	0.12133521580209385	1.3102111531064295	0.19178048903138004	1	0.2505789550886578
ENSMUSG00000033918	Parl	-0.10775532529265446	0.014367033808093866	-7.500179002289882	3.287267170146556e-12	2.1331076667081e-8	2.3511106499526456e-10	0.17946499763808377	0.11871495149959264	1.5117303706997647	0.13234255690012023	1	0.18123080632732386
ENSMUSG00000028648	Ndufs5	-0.10787810257040281	0.014420871078103015	-7.48069253141077	3.3280713052920704e-12	2.1592526628734952e-8	2.35469991277654e-10	0.034337361935960965	0.11856305629966303	0.289612658509534	0.7724434487321754	1	0.815315670942848
ENSMUSG00000042569	Dhrs7b	-0.10103090464991593	0.01294616570562819	-7.803924879935219	4.108557509939616e-12	2.6652212566978286e-8	2.8597514478672674e-10	0.8234936821108714	0.11171096994995253	7.371645617971123	5.737457739267505e-12	3.229041215659752e-8	3.961434619557207e-11
ENSMUSG00000042842	Serpinb6b	0.08994917268841182	0.012123425510496715	7.419451920625235	4.1288204794436236e-12	2.6779529629671344e-8	2.8597514478672674e-10	-0.6904899560343556	0.11910706390755171	-5.7972208648371915	2.862411513414989e-8	1.439506750096398e-4	1.2135739534968188e-7
ENSMUSG00000058076	Sdhc	-0.1056117780153798	0.013949886737431952	-7.570798243973554	4.318229632163031e-12	2.8003719164577258e-8	2.9597865603784113e-10	-0.37154903615375073	0.11773599187404139	-3.1557812546502224	0.0018739448310364163	1	0.0038400987194704512
ENSMUSG00000028127	Abcd3	-0.10229967925937573	0.012727745761873932	-8.03753321077604	4.3789052453605266e-12	2.8392821610917653e-8	2.9704326303579657e-10	0.8052425383460029	0.1119671059219223	7.191777725393031	1.603955932294583e-11	8.9420543225423e-8	1.0491083533298564e-10
ENSMUSG00000024965	Fermt3	0.10805105482498774	0.012733260640750518	8.485733377607124	4.7384652630864e-12	3.071947030058913e-8	3.172147273132246e-10	0.3476780243215906	0.11534158439994555	3.0143336952613837	0.0029419707408852177	1	0.005802807996110531
ENSMUSG00000037720	Tmem33	-0.10302058087698794	0.013699088890913178	-7.520250558073473	4.772683587235446e-12	3.093653501246016e-8	3.172147273132246e-10	0.7284708473834269	0.11501079736747609	6.333934413617336	1.8283522849538761e-9	9.624446427997205e-6	9.134820072130982e-9
ENSMUSG00000015143	Actn1	0.0936244059537233	0.012608329569918843	7.425599516140023	4.934158907340891e-12	3.197828387847632e-8	3.2466765610303064e-10	-0.9122008479482359	0.10408452458400794	-8.764039146011442	1.3257158835606319e-15	7.876078064233714e-12	1.3630016427857747e-14
ENSMUSG00000026623	Lpgat1	-0.10749687224568014	0.01385036699729815	-7.761301362386282	5.205636324283619e-12	3.373252338135785e-8	3.3913947538402193e-10	0.28966596013488394	0.11978694224667347	2.4181764280983478	0.016584168148704663	1	0.028117450764874177
ENSMUSG00000078439	Smim24	0.1028214672843103	0.013853942466172105	7.421820000723609	5.26607515856157e-12	3.411890095232041e-8	3.3971347591505033e-10	-0.6630908614375168	0.11455513776126677	-5.7883991446931	3.071865367306389e-8	1.5426907874612687e-4	1.2965281665731906e-7
ENSMUSG00000027222	Pex16	-0.08897695297661429	0.011329321441655988	-7.853687745981076	5.615834661599864e-12	3.637937693784392e-8	3.587591463429816e-10	1.1897549024766232	0.09881675203143903	12.040012224831038	6.172219156120862e-25	3.929234714786541e-21	1.8889861417337336e-23
ENSMUSG00000030562	Nox4	-0.10517318504102538	0.013878970883619404	-7.57788066009675	5.7587588295006135e-12	3.7299480938675476e-8	3.643522413280196e-10	-0.35544100848227317	0.11806450172125385	-3.01056628622765	0.0029783835297056485	1	0.0058658376610186075
ENSMUSG00000067847	Romo1	-0.10317621919424834	0.013916480771820113	-7.413959095403837	5.8508462464609806e-12	3.789008029208131e-8	3.666530314448881e-10	0.4182022163033013	0.11541487121346039	3.623469072107997	3.7724773833970474e-4	1	8.718967749474034e-4
ENSMUSG00000029209	Gnpda2	0.09397937164940652	0.012799285504842278	7.342548270671192	6.4506897884044304e-12	4.1768216379918685e-8	4.004296113934071e-10	-0.2580595750622237	0.12574707662255347	-2.052211327638445	0.04155765446618796	1	0.06450798923980108
ENSMUSG00000020810	Cygb	0.0939370776991389	0.012810932178484568	7.3325716185510945	6.833908030672412e-12	4.424272059057319e-8	4.1674883989790465e-10	0.15097516414980872	0.12586149981924993	1.1995341257384076	0.2318543400261527	1	0.2966941962995109
ENSMUSG00000025289	Prdx4	0.10494986384573139	0.013637233789884427	7.695832267947122	6.840254515041597e-12	4.4276967475864254e-8	4.1674883989790465e-10	0.011652996685718817	0.11756651761077702	0.09911832826670897	0.9211535445006986	1	0.9381195361112207
ENSMUSG00000023175	Bsg	-0.09622607234849141	0.012899943428118349	-7.459418166032022	7.174756527763497e-12	4.643502424768535e-8	4.331183298411359e-10	-0.7192183894457537	0.10863523702670823	-6.620488978810182	3.903528134178706e-10	2.1008788418149794e-6	2.1422197767219253e-9
ENSMUSG00000053768	Chchd3	-0.10317877069672288	0.014072846578671843	-7.331762633801172	7.659912706765472e-12	4.956729512547937e-8	4.5820205100469824e-10	0.3517774836286805	0.11553680722157018	3.044722215268255	0.0026757240764624067	1	0.005332000128141319
ENSMUSG00000029810	Tmem176b	-0.09565672301409812	0.012206470309097418	-7.836558857051876	7.884887081840237e-12	5.101521941950633e-8	4.659283513156777e-10	0.9608830244772727	0.10695917338226446	8.983642955458764	3.2754376434226844e-16	1.9580566232380806e-12	3.57419232068346e-15
ENSMUSG00000002981	Clptm1	-0.09078920442864523	0.01201217614998499	-7.558097991158635	7.93069534154345e-12	5.130366816444457e-8	4.659283513156777e-10	1.1064070657836247	0.10264771329530914	10.778682059877763	2.9135012400593136e-21	1.825017176773154e-17	6.047583015643622e-20
ENSMUSG00000032349	Elovl5	-0.10664180042222302	0.01436584426499336	-7.423288075180335	8.034614263305538e-12	5.196788505506022e-8	4.678562995800923e-10	-0.13885769122322622	0.1206071423117027	-1.1513222895569148	0.25111324411405866	1	0.317877096242883
ENSMUSG00000022295	Atp6v1c1	0.11086468265003828	0.015087755687435745	7.347990313917948	8.48024550437117e-12	5.484174767676836e-8	4.858106532618205e-10	0.05688613326273838	0.12498634351946326	0.45513879085421755	0.6495543718427694	1	0.7061073462292125
ENSMUSG00000006728	Cdk4	0.09163103490746421	0.012560828699538286	7.294983245080988	8.49061172114124e-12	5.4900295388899256e-8	4.858106532618205e-10	0.3926575216244767	0.1234043484947696	3.1818775141551776	0.0017163844147089326	1	0.00353926964863202
ENSMUSG00000024487	Yipf5	-0.10871336318294415	0.013737990183865203	-7.913338248750844	9.275504815191127e-12	5.996613863021064e-8	5.26145014516876e-10	0.3141494817658797	0.12105805107784395	2.595031713866533	0.010229164245487235	1	0.01812763284010396
ENSMUSG00000022354	Ndufb9	-0.10692306044074129	0.014662606142534732	-7.292227548182471	1.0010371783067717e-11	6.470704320574972e-8	5.629764643810733e-10	0.19253786331999986	0.12067864143121383	1.5954593210244696	0.112351044355562	1	0.15632689191363883
ENSMUSG00000026032	Ndufb3	-0.10502134689037469	0.014432610418618949	-7.27667025189641	1.0630345485869306e-11	6.870392287517333e-8	5.927768923476275e-10	0.34571343268097476	0.11858503522241406	2.9153209090216685	0.004001468680868044	1	0.007714522097893855
ENSMUSG00000071528	Usmg5	-0.10345518470939304	0.014221655487316243	-7.274482552446922	1.1363066814520897e-11	7.342813775543403e-8	6.283107532735084e-10	0.10282531808543395	0.1172458779252401	0.8770058266014163	0.38164329371549255	1	0.4525523288246424
ENSMUSG00000023277	Twf2	0.10493919252333331	0.013484605765271034	7.782147609654206	1.2089590959387597e-11	7.811084718860326e-8	6.629125709397533e-10	0.12079717044239699	0.11844869505989972	1.0198269417937416	0.30916313250617766	1	0.37868455172945814
ENSMUSG00000076613	Ighg2b	0.09217629109838012	0.012770465707704735	7.217927145974629	1.322520630297573e-11	8.543483271722321e-8	7.191889047403331e-10	-0.3463408438499431	0.12546393540834036	-2.7604812707550357	0.006352783194391166	1	0.011741941971655583
ENSMUSG00000031246	Sh3bgrl	0.07966402139313604	0.011044061020112564	7.213290586502399	1.3581541078548093e-11	8.772317382634213e-8	7.325126253839873e-10	-1.0549282830066424	0.10850280562886495	-9.722589908089901	2.6163744698467887e-18	1.6022677253341735e-14	3.767121227919446e-17
ENSMUSG00000024037	Wdr4	0.10459001111007378	0.01383051822555051	7.562262628514824	1.372357039632288e-11	8.862681761945316e-8	7.341552293317443e-10	0.06145466960423318	0.11944554882376907	0.514499453595411	0.6075273328833652	1	0.6684832525706593
ENSMUSG00000029299	Abcg3	0.10639999048990857	0.014728973016647369	7.223856705396253	1.509643812592636e-11	9.747770097910651e-8	8.010851844241569e-10	0.4704342317862086	0.12129418813827991	3.8784564949632703	1.4698253985602128e-4	0.5763185387754595	3.6358838806489476e-4
ENSMUSG00000021669	Col4a3bp	0.08949579512482606	0.012452785827759263	7.186809149590088	1.5805993814986967e-11	1.0204349606955587e-7	8.31436359030968e-10	0.48262505587021703	0.1223428771125602	3.944856188286166	1.1325198996637944e-4	0.4506296680762238	2.863943481855406e-4
ENSMUSG00000032120	C2cd2l	-0.09226353243870543	0.012840165437561009	-7.185540785075032	1.592112176867811e-11	1.0277084101681721e-7	8.31436359030968e-10	-0.18999531495387068	0.1261487031063101	-1.5061218250793647	0.13374145413693686	1	0.18284204617100447
ENSMUSG00000061518	Cox5b	-0.10350459641754804	0.014407254829252291	-7.184199741327109	1.7969568628528122e-11	1.159755959285205e-7	9.310217446906696e-10	0.3008350991463402	0.11837778398753362	2.541313826064029	0.011881088401725817	1	0.020780851058839946
ENSMUSG00000034361	Cpne2	-0.10380351608724471	0.012764170214391813	-8.132413963753361	1.9947718369994115e-11	1.2872262664157203e-7	1.024102753979475e-9	-0.5104659176834422	0.11580322680921609	-4.408045714688299	1.776699513223289e-5	0.07645138005399812	5.1319942041304835e-5
ENSMUSG00000021520	Uqcrb	-0.10578575009034864	0.014595055048666148	-7.248054203126591	2.0077394416922837e-11	1.2953934877798615e-7	1.024102753979475e-9	-0.10620486981590534	0.12233130217997447	-0.8681741134387351	0.38644519429347335	1	0.4574385063706033
ENSMUSG00000057604	Lmcd1	0.10163224171076002	0.013270001447535878	7.658796580586072	2.4346121235112998e-11	1.5705682808771395e-7	1.2322882902080272e-9	-0.5460683791327994	0.11706850042987865	-4.664520149550236	5.967320031123868e-6	0.026626181978874702	1.852995082812414e-5
ENSMUSG00000022536	Glyr1	-0.14642976826514442	0.015385605909140452	-9.517322173067736	2.584287021232327e-11	1.6668651286948508e-7	1.298061725168604e-9	-0.3105908649039625	0.10136824375241119	-3.063985854017271	0.0025123839079012602	1	0.00502629556521444
ENSMUSG00000004980	Hnrnpa2b1	0.10200350480825718	0.014068832410725597	7.250317711546069	2.6832880597940596e-11	1.730452469761189e-7	1.3375784419276449e-9	0.20320639862285686	0.11896247203892818	1.7081554808003778	0.08931570284399121	1	0.12798286688010935
ENSMUSG00000038845	Phb	-0.10388651523548421	0.014600253341230367	-7.11539127489754	2.7408613836021693e-11	1.7673074201466787e-7	1.3560051055715996e-9	0.34151483623207635	0.12020704403128603	2.8410551060817286	0.005011101491802689	1	0.009467788520325069
ENSMUSG00000051256	Jagn1	-0.10212928643950911	0.014008816312214482	-7.290358026213903	2.933369260680219e-11	1.8911431623605375e-7	1.440415651886257e-9	0.5625060071456967	0.11929325052353963	4.715321316814146	4.792958921488056e-6	0.02147724892718798	1.5017937953995909e-5
ENSMUSG00000024191	Bnip1	-0.10453759704265606	0.013947920863923859	-7.494851602796326	2.9907678662478297e-11	1.927848966583351e-7	1.4577224118452385e-9	0.4899291931327161	0.12116347377281811	4.043538682716664	7.769611464229507e-5	0.3145138720720104	2.0183199145136266e-4
ENSMUSG00000028102	Pex11b	-0.10205361393342324	0.013270588803246214	-7.6902099406816955	3.196917402960768e-11	2.060413266208215e-7	1.5467438611383715e-9	0.6363056659658209	0.1174187465841719	5.41911478768583	1.8798861158369318e-7	9.128726978504141e-4	7.170811966496817e-7
ENSMUSG00000041028	Ghitm	-0.09919869562769128	0.013998602963999247	-7.086328248812001	3.374101743115943e-11	2.174271163263914e-7	1.6205539758907232e-9	0.6535461918373437	0.11556542888806706	5.655205004866528	5.964744733206405e-8	2.9614957600369797e-4	2.4287141302288455e-7
ENSMUSG00000024935	Slc1a1	0.1063209493691194	0.01508377757757347	7.048695117806376	3.7331341115478744e-11	2.4052583080702955e-7	1.7800016271003631e-9	0.19335304819419463	0.12356145839564342	1.5648330046014733	0.11936771476038543	1	0.16504298447643123
ENSMUSG00000047260	Emc6	-0.09865024073730169	0.013413294636573142	-7.354661431824409	4.351742515588812e-11	2.8033925285423127e-7	2.0600335073794522e-9	0.6946977706265524	0.11626492529442346	5.975127656662872	1.1839911934041151e-8	6.0549309630686446e-5	5.3106080794813067e-8
ENSMUSG00000022451	Twf1	0.07350632605062304	0.010511358647003314	6.993037581452802	4.7520536208587667e-11	3.0607977371951317e-07	2.2334652018036204e-9	1.1130984358946796	0.10326925051338273	10.778604767257727	2.4727777294763447e-21	1.550431636381668e-17	5.2317933954837133e-20
ENSMUSG00000020022	Ndufa12	-0.10359058635293301	0.014751327346033103	-7.022458652223618	4.8672980408374396e-11	3.134539938299311e-7	2.271405752390805e-9	0.23602806412583235	0.12184107005134953	1.9371798362108859	0.054276964816785844	1	0.08193219281818098
ENSMUSG00000022551	Cyc1	-0.10308597489748982	0.014757023489130272	-6.985553351827411	5.5609742497325246e-11	3.5807113194027725e-7	2.576845814312677e-9	0.10496767300269524	0.12133800816227372	0.8650848533982419	0.3881353987080407	1	0.4590662177336554
ENSMUSG00000040659	Efhd2	0.1461510570877996	0.014471553984368812	10.099195790974628	6.743861896486015e-11	4.341698288957697e-7	3.103119669851607e-9	-0.05427331615785099	0.0939016040989391	-0.5779807137337728	0.5640301957758667	1	0.6277602652579842
ENSMUSG00000060373	Hnrnpc	0.10145140465300827	0.01426954219754208	7.109646774125887	7.016458175305461e-11	4.5164941274441256e-7	3.2061315828826342e-9	0.30132543818724894	0.12135929541172472	2.4829201353301316	0.013937735471959476	1	0.024083587028753507
ENSMUSG00000035203	Epn1	0.0998755642273805	0.013815369318002247	7.2293083107982286	7.151423837198188e-11	4.6026563816207534e-7	3.2452668171561433e-9	-0.7531168866957356	0.1183350785590022	-6.3642741938116805	1.5650187476428927e-9	8.260168950059188e-6	7.90316451227186e-9
ENSMUSG00000002658	Gtf2f1	0.10179778878493413	0.01405045918260855	7.245157433070794	7.431222868059178e-11	4.781991915596082e-7	3.329678183398048e-9	-0.42138908534670344	0.12168535319438081	-3.4629400686668865	6.660318603273755e-4	1	0.0014780740778934675
ENSMUSG00000026822	Lcn2	0.10418823122038658	0.013710382567720818	7.5992212985860235	7.438642750144575e-11	4.786022745443019e-7	3.329678183398048e-9	0.15490143103799733	0.12258936173759458	1.2635797172153282	0.20799335201158178	1	0.2694617555101808
ENSMUSG00000029569	Tmem168	-0.1053473167564883	0.014827416931196926	-7.10490014851051	7.734788156478828e-11	4.97578922106283e-7	3.4388450047047763e-9	0.3047420521292784	0.12573309020451334	2.4237219624014243	0.016346486244813073	1	0.027778894496608992
ENSMUSG00000022404	Slc25a17	-0.10224136863011137	0.013726670010007273	-7.448373753836397	8.224470869666666e-11	5.289979663369599e-7	3.6320146525105142e-9	0.4167385777101618	0.12125792674326362	3.4367945164732365	7.29232640053762e-4	1	0.0016031910362692128
ENSMUSG00000020402	Vdac1	-0.0895093943446789	0.012946790386686205	-6.913635864277654	8.899134902269644e-11	5.723033655649609e-7	3.9037538437956175e-9	0.9193304845854627	0.10696319920055722	8.594829730753542	3.7892601239343384e-15	2.236042399133653e-11	3.666666414042345e-14
ENSMUSG00000038429	Usp5	0.08288286808043123	0.012046915382489056	6.88000749145351	8.962970273822145e-11	5.76318988606764e-7	3.905718172301305e-9	0.7099638471711133	0.11835538718893016	5.998576524766053	1.0253730669884775e-8	5.255036968315947e-5	4.63389751427485e-8
ENSMUSG00000006649	Nphs1	0.07911186250282369	0.0115050261453393	6.8762870682281765	9.15124763660709e-11	5.883337105574698e-7	3.961526937425964e-9	-0.9617119120706957	0.11303157537154174	-8.50834741451218	5.8995615296651874e-15	3.473071872513896e-11	5.593532401325207e-14
ENSMUSG00000046841	Ckap4	-0.1037382128034008	0.014963217768983074	-6.932881309689782	9.696181579122946e-11	6.23270551906023e-7	4.16999181638098e-9	-0.03509553178391248	0.12472315458046584	-0.2813874609086351	0.7787339159121563	1	0.8210333547030907
ENSMUSG00000019927	Ube2d1	0.08809992948107921	0.01284848355827875	6.856834822683272	1.0200956668796755e-10	6.556154851035674e-7	4.358590576667705e-9	0.307245247908185	0.12623042480576385	2.434003120729067	0.01588290861072469	1	0.027046982054494944
ENSMUSG00000017697	Ada	0.10674828289414495	0.011591986108409526	9.208800105160867	1.0295279994956065e-10	6.615746924758767e-7	4.3705124107619945e-9	-0.6459722615926553	0.11320603417479248	-5.706164572422532	4.569677235120996e-8	2.2811828757724012e-4	1.8918879044384491e-7
ENSMUSG00000016382	Pls3	0.09026711249700928	0.012915442829740244	6.9890838190350095	1.293482165174809e-10	8.310622911248148e-7	5.4558414402886185e-9	-0.8636188039920375	0.10987140790677703	-7.860268840140786	3.2618811332558983e-13	1.875907839735467e-9	2.5859250429908205e-12
ENSMUSG00000026192	Atic	0.08857486792619455	0.0130178823554605	6.80409190278485	1.368160978299793e-10	8.78906612459787e-7	5.734075947269195e-9	-0.24169796733408125	0.12789468985563113	-1.8898201919635012	0.060345908865363576	1	0.09022405824451088
ENSMUSG00000068823	Csde1	0.07851269621548093	0.011551864706211402	6.796538759085786	1.4267582846462217e-10	9.164068462282682e-7	5.94181614745072e-9	0.8774465665160729	0.1134917426285848	7.731369227342124	6.600286414209567e-13	3.777343914852135e-9	5.061758112529015e-12
ENSMUSG00000031059	Ndufb11	-0.1012565487822614	0.014848867608100088	-6.819142809720099	1.4988429683923897e-10	9.625569543015927e-7	6.202758950957185e-9	0.21925441929928777	0.12266854993985958	1.7873727162078716	0.0755470941864689	1	0.11039304458071628
ENSMUSG00000025968	Ndufs1	-0.10110104656661242	0.014887458788453017	-6.7910210871601695	1.6041642186204475e-10	1.0300338447761893e-6	6.557771526773236e-9	0.3129946146603586	0.12221995474428062	2.56091253932497	0.011254329866395765	1	0.019795105725978115
ENSMUSG00000020900	Myh10	-0.09999353456185656	0.014747164356197525	-6.780526218237615	1.6045611182530257e-10	1.0301282379184424e-6	6.557771526773236e-9	-0.13316334954518355	0.12031937077204898	-1.1067490520497163	0.26986998706775067	1	0.33719112726682077
ENSMUSG00000015714	Cers2	-0.09345812825031193	0.013240235956501005	-7.058645220323558	1.718559330834633e-10	1.103143234462751e-6	6.980321232649313e-9	0.8345613090291645	0.11441120239389332	7.294402047764066	8.934762038672325e-12	5.009721075083572e-8	6.036009672942905e-11
ENSMUSG00000055044	Pdlim1	0.0911849548112316	0.013100103113171722	6.960628784635148	1.7482219442714248e-10	1.1220088438334004e-6	7.05723950509569e-9	-0.9797830395736248	0.11131849496351676	-8.801619532268527	1.0608361120715395e-15	6.3087923584894455e-12	1.100993945966992e-14
ENSMUSG00000028766	Alpl	0.09808030956147777	0.014508969328045627	6.759977731284465	1.7687835797830715e-10	1.135028423146797e-6	7.0967048505930554e-9	-0.22922289249933148	0.1180414706340884	-1.9418844179762	0.053702086080218626	1	0.08115749343312782
ENSMUSG00000019809	Pex3	-0.09433282321220669	0.012573309055039726	-7.502625028881758	1.9213313029341295e-10	1.2327261639625375e-6	7.662036347458527e-9	0.8533318134427943	0.11310448253462344	7.544633018249946	2.0807003815574537e-12	1.179965186381232e-8	1.5045064297415435e-11
ENSMUSG00000030096	Slc6a6	0.10091686977304593	0.014947571396846757	6.751389044666794	2.0921007460008112e-10	1.3420826285595204e-6	8.292784884750204e-9	0.343892197209829	0.1231337660186869	2.7928342349054733	0.005786173332814844	1	0.010810056936377533
ENSMUSG00000024327	Slc39a7	-0.09332678095038284	0.01356725038567929	-6.878827934722318	2.1360388514513518e-10	1.370055319320897e-6	8.416248887754427e-9	0.8159496454923725	0.11509932960240064	7.089091207663768	2.891868207134479e-11	1.6015166131110745e-7	1.824400076984168e-10
ENSMUSG00000031711	Zfp330	0.10283520206537716	0.014935117993702781	6.885462981192143	2.1541170810140835e-10	1.3814352840543318e-6	8.43695856730516e-9	0.1554603326759062	0.12653689177096686	1.2285771406278185	0.22082278042517395	1	0.284227231236139
ENSMUSG00000046865	Fbl	-0.09972849234896329	0.014376189118784436	-6.937060407660784	2.1848170518307112e-10	1.400904693633852e-6	8.50656579943555e-9	0.07873519488206411	0.12296234908139761	0.6403195406582842	0.5227715979595762	1	0.5886100469839171
ENSMUSG00000032463	Faim	0.09701090077819591	0.013954405451972641	6.951990976045642	2.2045274678647094e-10	1.4133225596480652e-6	8.532818081499875e-9	-0.5294918578193818	0.11982937576382906	-4.4187149807318855	1.702456625615903e-5	0.07332480686527694	4.926193753980933e-5
ENSMUSG00000037254	Itih2	0.08601158102558898	0.012811269464221115	6.713743807028589	2.2555288543202875e-10	1.4457939956193042e-6	8.67916950960672e-9	-0.46429703215254936	0.12586481349604395	-3.688854885302338	2.960489688307641e-4	1	6.98208679177931e-4
ENSMUSG00000021576	Pdcd6	-0.1443632084708829	0.012960840808715618	-11.13841382681012	2.348845132996108e-10	1.5053748457372055e-6	8.985698241345576e-9	-0.2438684336286855	0.09654411384256435	-2.5259793054433612	0.01250820247817551	1	0.021779299366603562
ENSMUSG00000031903	Pla2g15	0.0844278395425164	0.012592901483790327	6.704399272176672	2.374706396681436e-10	1.521711858993464e-6	9.032120283331703e-9	-0.5916905827693072	0.12371944880699515	-4.782518742807823	3.524239049646019e-6	0.015933084743449653	1.1257035411005245e-5
ENSMUSG00000010097	Nxf1	-0.09332842335638936	0.013462700191156472	-6.932370329222363	2.417129780054296e-10	1.5486550500807873e-6	9.140640202734062e-9	-0.5423801672063275	0.11550667291615985	-4.695660895713034	5.219760345300155e-6	0.023363647305563492	1.6316400509299297e-5
ENSMUSG00000032330	Cox7a2	-0.09491610987425793	0.014174252940770411	-6.6963747769199164	2.7239029638710604e-10	1.7449322386558014e-06	1.0241875144155187e-8	0.5742947027464402	0.1165006549332255	4.92954055130083	1.852140503446163e-6	0.00850502919182478	6.127242087820891e-6
ENSMUSG00000033658	Ddx19b	0.10140375062321948	0.013771447218704993	7.363332917217908	2.8504994725936436e-10	1.8257449121962288e-6	1.0656980982764871e-8	-0.15211844365433722	0.12406651562066032	-1.2261039402399847	0.22173871915959606	1	0.2850245696562106
ENSMUSG00000069516	Lyz2	0.09828001491981783	0.014030607206124526	7.004687215312923	2.997655456089889e-10	1.919698554079965e-6	1.1143826497780492e-8	0.3320353107902179	0.12188371378492091	2.724197519745221	0.007074565789230097	1	0.01296675289502341
ENSMUSG00000024650	Slc22a6	-0.13146720459466538	0.011536412676549396	-11.395847936499784	3.2304615387793557e-10	2.0684645232804216e-6	1.1941818497285485e-8	0.9021675663037304	0.08832740227314333	10.21390353487212	7.43435410563286e-19	4.572871210374772e-15	1.1373027326633078e-17
ENSMUSG00000039046	Usp6nl	0.10173272122546634	0.015198044393366037	6.693803399460577	3.3036673448382617e-10	2.115007834165455e-6	1.214420733465685e-8	-0.06325165334918728	0.12627593714352564	-0.5009002885268256	0.617048774215256	1	0.6772612067283376
ENSMUSG00000062825	Actg1	0.14434633802193106	0.011678407792509376	12.360104269908776	3.4650968203949026e-10	2.218008474734777e-6	1.2666853932332478e-8	-0.4467286438958291	0.09318739244572548	-4.793874280321926	4.436893726217463e-6	0.019930526618168843	1.3975471861422168e-5
ENSMUSG00000030805	Stx4a	-0.0991383621708664	0.01411403595263907	-7.0240973243609535	3.926225015688837e-10	2.5127840100408555e-6	1.4209966831610671e-8	-0.34608141611036847	0.12351178097905796	-2.802011381967266	0.0056284962882670415	1	0.010530425242194236
ENSMUSG00000021577	Sdha	-0.09133656091285253	0.013425691789619134	-6.803117660087712	3.9304163576795475e-10	2.5150734272791424e-6	1.4209966831610671e-8	-0.6721998065548626	0.11477813029404213	-5.856514693459464	2.1696167999811666e-8	1.097392177430474e-4	9.373656299327693e-8
ENSMUSG00000055723	Rras2	0.0776610853188572	0.011754905992110752	6.606695567874303	4.0583263954989237e-10	2.5965172278402113e-6	1.4592233706220173e-8	-0.9173937491362686	0.1154865296130511	-7.943729473992214	1.855432448837651e-13	1.071141152713976e-9	1.5109833556128395e-12
ENSMUSG00000026175	Vil1	0.09384407253514875	0.013898916499387907	6.751898433182294	4.388694929370633e-10	2.8074481463183937e-6	1.5694354693075413e-8	0.41465784854045357	0.11825460248863538	3.5064838054003302	5.719810093465145e-4	1	0.0012827658628152914
ENSMUSG00000033220	Rac2	0.08671240400469163	0.01316658350399236	6.585793799765806	4.5486330793809105e-10	2.9093057175720303e-6	1.6178381439095345e-8	-0.07044498988069885	0.12935561005396745	-0.5445839562065306	0.5866955190165357	1	0.6496897534716939
ENSMUSG00000028049	Scamp3	-0.0856295227647361	0.013018312300766733	-6.577620876378331	4.755812795591238e-10	3.041342282780597e-6	1.6775572758272904e-8	0.3400228160276752	0.12789891386995958	2.6585277836947956	0.008535901094629704	1	0.015379580833149905
ENSMUSG00000038843	Gcnt1	-0.09930728481147168	0.014458347841855191	-6.868508483658758	4.767525996652026e-10	3.0483561222593053e-6	1.6775572758272904e-8	0.12281350445124588	0.12520514874246205	0.980898195359876	0.32794542585594477	1	0.39798614941573524
ENSMUSG00000031960	Aars	0.09429832591148284	0.012190324661833608	7.73550570041167	5.134533313450557e-10	3.2825071472889413e-6	1.797086659707695e-8	0.8083325180444058	0.11103510992417696	7.279972241180248	9.735514719044127e-12	5.451888242664711e-8	6.530039434384339e-11
ENSMUSG00000001270	Ckb	0.08502203619918489	0.012988021860108452	6.5461882582999396	5.642741309494281e-10	3.6068402450287446e-6	1.9645099373794905e-8	-0.37778036552751393	0.12760132426146567	-2.960630445757841	0.003472366716524811	1	0.006773843164759341
ENSMUSG00000029047	Pex10	-0.09130018585249247	0.012998822745631062	-7.023727274316338	5.715757738209302e-10	3.6529407704895652e-6	1.979121861911035e-8	0.7957954283315879	0.11504102866203286	6.9174922858997805	7.529128991280274e-11	4.1327389033137424e-7	4.536782853720165e-10
ENSMUSG00000024858	Grk2	0.09504567640062159	0.014348422339970178	6.624120349165797	5.744867410714402e-10	3.670970275446503e-6	1.979121861911035e-8	-0.12610988416722993	0.12031539685851451	-1.0481608128303768	0.2959575453802382	1	0.36536597534746107
ENSMUSG00000033308	Dpyd	0.08275791987731758	0.012657665501270307	6.5381661309514065	5.894008367296819e-10	3.7656819458659373e-6	2.019925784209014e-8	0.5047630105126834	0.12435572540738495	4.059025098033063	7.264853151919416e-5	0.29524363209400506	1.8991948247767086e-4
ENSMUSG00000026255	Efhd1	0.1369476747568352	0.012884882339010632	10.628554545834584	6.204090919263404e-10	3.963173279225462e-6	2.1151771113343626e-8	-0.5672533513523603	0.09978174175501826	-5.684941366778975	6.836086595338426e-8	3.3838628646925206e-4	2.757906180093614e-7
ENSMUSG00000031168	Ebp	-0.09594838607380533	0.014287929759764026	-6.715345587994407	6.319769226977527e-10	4.036436605270547e-6	2.1435093563666048e-8	0.36885470343427096	0.12217556007187509	3.019054737439109	0.002900133599190081	1	0.00573059431912034
ENSMUSG00000071253	Slc25a16	-0.09777961255574073	0.014901111766359023	-6.561900486948193	6.872256077501904e-10	4.388622731092716e-6	2.3123017269687512e-8	0.3260861959840147	0.12405111521569061	2.6286438087802835	0.009307443130788923	1	0.016642112989291066
ENSMUSG00000004264	Phb2	-0.09714747595029437	0.014865973765654097	-6.5348881601514055	6.887707271821813e-10	4.397801093058228e-6	2.3123017269687512e-8	0.33220608297515053	0.12268374611767077	2.7078247403410614	0.007420603161101882	1	0.013540645812548636
ENSMUSG00000046985	Tapt1	-0.09918318282532604	0.013834666946169104	-7.169177488063087	7.028154966879781e-10	4.486774130856052e-6	2.347475110764922e-8	0.39618076792779194	0.12386038085249132	3.19860770006524	0.0016288095886639506	1	0.0033756116829634004
ENSMUSG00000025036	Sfxn2	-0.09322124770150712	0.014290467505409568	-6.523316866031066	7.725349764068346e-10	4.931090754404825e-6	2.567313204422713e-8	-0.5119615783315639	0.11837261978701358	-4.32499998101529	2.513585502559699e-5	0.10672684043868483	7.083251651752813e-5
ENSMUSG00000032026	Rexo2	0.09826376347165013	0.013404903010738222	7.330434497954539	7.77116379450031e-10	4.959556733650097e-6	2.5695606918498514e-8	0.2428609986108729	0.12312968668021491	1.9724000373818624	0.050071552476039484	1	0.07610783444036494
ENSMUSG00000013593	Ndufs2	-0.09806912356309799	0.015098248680623835	-6.495397289948859	8.547274576823021e-10	5.45401590747077e-6	2.8120533357747738e-8	0.2087269452958284	0.12463659099427557	1.6746843252910777	0.09572006680812561	1	0.13585807584069598
ENSMUSG00000033161	Atp1a1	-0.1296587450026254	0.012555114069872909	-10.327165829082578	8.790507684826283e-10	5.608343902919168e-6	2.8776885853809423e-8	-0.7641000325473043	0.09465519676542503	-8.07245728346961	1.2822845428151072e-13	7.415451511099765e-10	1.0573223423212288e-12
ENSMUSG00000027957	Slc35a3	-0.0755389639862463	0.011494794610476883	-6.571580140927147	1.023758314128887e-9	6.53055428582817e-6	3.3348166866178594e-8	1.242500421760809	0.09756280622359531	12.735390358834447	5.729341470556976e-27	3.666205607009409e-23	2.071377300893676e-25
ENSMUSG00000038859	Baiap2l1	0.07503124919471271	0.01127762583777674	6.653106804038491	1.046301773889026e-9	6.673312713864208e-6	3.3914609222609815e-8	-1.3363405886626665	0.09649721625414677	-13.848488490518916	3.207852494677378e-30	2.0706687853142475e-26	1.6752118583315195e-28
ENSMUSG00000048351	Coa7	0.0969123631509654	0.014948053446135146	6.483276468082359	1.0600983670467674e-9	6.760247286657236e-6	3.419336889788103e-8	-0.4004593538412777	0.12444353107942911	-3.2180005691551354	0.0015293962678223358	1	0.003185637050418161
ENSMUSG00000020189	Osbpl8	-0.09548794095813916	0.013797222319017354	-6.920809040419947	1.079063046763079e-9	6.880105986161392e-6	3.4635291940005165e-8	0.544974811098581	0.12227034098746953	4.457130050487313	1.4484531983623107e-5	0.06286165452144532	4.2504314194572044e-5
ENSMUSG00000030108	Slc6a13	-0.1298461446232909	0.014099409034082872	-9.209332413111103	1.0863755473688162e-9	6.925644114476203e-6	3.467839569676434e-8	-0.7885667175850802	0.09524057465445619	-8.27973498108439	3.494582923906333e-14	2.038390219514564e-10	3.074111716484448e-13
ENSMUSG00000073481	Marc2	-0.09234607668511838	0.014067455675700983	-6.564518759751967	1.0909464907644707e-9	6.953692932132736e-6	3.467839569676434e-8	0.5547503535872563	0.11955299852043365	4.640204431948564	6.641629638239451e-6	0.0295286853716126	2.0469284786705194e-5
ENSMUSG00000048022	Tmem229a	-0.07006784518312177	0.010916304051322018	-6.418641772316356	1.1238307153685907e-9	7.1621731490440285e-6	3.555195243810253e-8	1.1388052637713377	0.10724765233632437	10.618463331953317	7.190509621525802e-21	4.4883161057564056e-17	1.395680038632442e-19
ENSMUSG00000036199	Ndufa13	-0.09641006541592692	0.014976943412660235	-6.437232401801695	1.1621498791973507e-9	7.405219030245519e-6	3.6588259354634295e-8	0.22894424698470692	0.12362770549421363	1.8518846246436451	0.06566797882502459	1	0.09718742705098106
ENSMUSG00000023032	Slc4a8	-0.1405475712313161	0.014847831762267434	-9.465865015287111	1.2005850597774965e-9	7.64892741584243e-6	3.761833187302822e-8	-0.3917136793330323	0.10393380787733084	-3.768876435234214	2.237728042054303e-4	0.8604064321698794	5.381670510496094e-4
ENSMUSG00000033577	Myo6	0.1423312931331378	0.01357877905016273	10.481891826013037	1.2591594670495178e-9	8.020845805105429e-6	3.917574449878136e-8	-0.08455706353871163	0.1085522910947772	-0.7789523619071725	0.4373476422778312	1	0.5067688993997952
ENSMUSG00000023021	Cers5	-0.09233286884225735	0.014192619967064671	-6.505695851542884	1.2621972391704633e-9	8.038934216276681e-6	3.917574449878136e-8	0.5190862028980667	0.11984475293804474	4.331321899144094	2.447523340747734e-5	0.10406869244859365	6.912967984545879e-5
ENSMUSG00000028434	Epb41l4b	-0.09788170017582	0.013276545321132833	-7.3725278533126835	1.329169688897654e-9	8.464152578900261e-6	4.106073499035945e-8	0.35251132734829155	0.12155176226718847	2.9000922798093236	0.004189450787568795	1	0.008043941109484292
ENSMUSG00000027130	Slc12a6	-0.13197607413870993	0.013654397090888776	-9.665463312677067	1.39267562363326e-9	8.867165695672967e-6	4.2821521511714256e-8	0.7244494942846377	0.1005153548034676	7.207351510633532	1.96225485419913e-11	1.0919948263618159e-7	1.27083040754235e-10
ENSMUSG00000070934	Rraga	0.10261572223687337	0.01242225679328528	8.260634435792795	1.4595122066282462e-9	9.291254707395415e-6	4.466786195169237e-8	-0.3228154114178396	0.121522225217582	-2.6564310424685527	0.008593337506666712	1	0.015474592444955382
ENSMUSG00000000563	Atp5f1	-0.09560289907054138	0.014927398078206333	-6.404525327834559	1.4945086114455377e-9	9.512547311850847e-6	4.5527160478294616e-8	-0.26254683532003503	0.12387009196103291	-2.1195337079642043	0.03540574600032147	1	0.055881460465846786
ENSMUSG00000022450	Ndufa6	-0.09653979499426331	0.015166124459203125	-6.365488774271592	1.6449062873148426e-9	1.0468183612471658e-5	4.9877803550837164e-8	0.18734719021468468	0.12483963379812021	1.500702817805812	0.13517192485772855	1	0.1845158818732342
ENSMUSG00000048970	C1galt1c1	-0.09873812022222599	0.01267800371318217	-7.788144131836887	1.690569228541363e-9	1.0757092001208693e-5	5.102727304496408e-8	0.646287726460503	0.11818804735770873	5.468300229247754	1.4818876502018164e-7	7.225684182384056e-4	5.718956444767127e-7
ENSMUSG00000021583	Erap1	0.08345825471875365	0.013173257966626085	6.335430075854565	1.7539787487475695e-9	1.1158812799532038e-5	5.2699452816251174e-8	-0.2681413667056802	0.12942118357085636	-2.0718506762756994	0.03966655362531435	1	0.06190842572451813
ENSMUSG00000019838	Slc16a10	-0.12919858237217124	0.013486276958742102	-9.580003641288256	1.7985906748878609e-9	1.1440835282961683e-5	5.3680802390940333e-8	-0.7341426116307158	0.09891074745775727	-7.422273418207186	5.599636651476442e-12	3.1520354711160896e-8	3.8703370973440116e-11
ENSMUSG00000030605	Mfge8	0.13568779567979747	0.012661212229179396	10.716809198339433	1.8029570407899411e-9	1.1466806779424026e-5	5.3680802390940333e-8	-0.18725171075896363	0.10652017912042504	-1.7578989474592281	0.08102542587257619	1	0.11743332648492319
ENSMUSG00000069053	Uba1y	0.08086220592391322	0.012778990008526416	6.327746235810515	1.8272581823197696e-9	1.1619534781371415e-5	5.415927405254092e-8	-0.5648786274982963	0.12554768273221809	-4.499315440995686	1.2023530701129821e-5	0.05242259385692602	3.562126610240172e-5
ENSMUSG00000027035	Cers6	-0.07919332167038413	0.011945004377020209	-6.629827764880203	1.8481311210280562e-9	1.175041766749638e-5	5.453229944558121e-8	1.1424816297747482	0.10410140438046404	10.97469949203826	7.829976642556378e-22	4.9219233175109395e-18	1.746482925695626e-20
ENSMUSG00000026395	Ptprc	0.08389471517882827	0.013266323834218378	6.323885669248866	1.86520238310444e-9	1.1857091549394923e-5	5.479032000369292e-8	-0.03992110949425725	0.130335512794831	-0.30629495091717235	0.7597245149640282	1	0.8044717264987616
ENSMUSG00000000290	Itgb2	0.10206779307977787	0.012703798024448371	8.034431347487509	1.8805410502569526e-9	1.1952718915433191e-5	5.4995378269736655e-8	0.07637986279690828	0.12279538110538674	0.62200924912116	0.534709191485226	1	0.6002024019059684
ENSMUSG00000025198	Erlin1	-0.09420901647273078	0.013841009638505795	-6.806513320432967	2.1676346196312944e-9	1.3775318007756876e-5	6.299640297331148e-8	0.4829347870863995	0.12336889630534424	3.914558706038121	1.2782507910331933e-4	0.5054203627745246	3.201692827520055e-4
ENSMUSG00000022912	Pros1	0.08350864099856636	0.013265600387975598	6.295127137574678	2.173280163365001e-9	1.3809022158021216e-5	6.299640297331148e-8	-0.013596698288208788	0.1303284052691735	-0.10432643797126862	0.9170233146986133	1	0.9344917780264638
ENSMUSG00000030759	Far1	-0.07344302546893348	0.011063163110157575	-6.638519629300433	2.2347196280738125e-9	1.419717379715293e-5	6.449322435406002e-8	1.3083443871362241	0.09694722886405258	13.495428414677978	3.2198896773116283e-29	2.0758628749628066e-25	1.5811100057246651e-27
ENSMUSG00000039886	Tmem120a	-0.07713962252022799	0.011945275452111584	-6.45775167173662	2.280075210229608e-9	1.4483037735378472e-5	6.55148248179512e-8	1.193321615741216	0.10223286895762901	11.67258268214888	7.413658871334174e-24	4.697294260877333e-20	1.991096954015464e-22
ENSMUSG00000071454	Dtnb	-0.1217751967457404	0.01470056036324086	-8.283711214862429	2.304415106815775e-9	1.4635340343386987e-5	6.573065145149671e-8	-0.7061561804069797	0.10103663207813743	-6.989110443238731	5.0162283225316855e-11	2.7654466742117184e-7	3.0905226930953643e-10
ENSMUSG00000018509	Cenpv	-0.13445568084297155	0.014491473563052784	-9.278261472717135	2.307565423297225e-9	1.4653040437937379e-5	6.573065145149671e-8	0.26036955260017514	0.1010988738177562	2.5753951826360097	0.010882748616509352	1	0.019208284843517043
ENSMUSG00000095079	Igha	0.10321813094994359	0.012513660337764267	8.248436361857085	2.318482517986869e-9	1.4720045506698632e-5	6.575696107048965e-8	-0.0839406081834613	0.1228586872367485	-0.6832289199192555	0.4953245675458904	1	0.5616336305977295
ENSMUSG00000021823	Vcl	0.08826754149945389	0.013675121671031755	6.45460739749267	2.4208462491848433e-9	1.5367531989825385e-5	6.836552926882519e-8	-0.6897970114051365	0.11719505839306403	-5.885888200947907	1.8693462238289604e-8	9.481324047260487e-5	8.151291022395334e-8
ENSMUSG00000026866	Kynu	0.05423642362053471	0.008646646086919386	6.272538863662221	2.4498155354072456e-9	1.5548979203229786e-5	6.888797531187895e-8	-1.5099623223850218	0.08494930967893527	-17.77486277512911	7.067284941534247e-42	4.643206206588e-38	4.22752135593594e-39
ENSMUSG00000007107	Atp1a4	-0.1299081622268188	0.013534943337272943	-9.59798345583566	2.6320434799475747e-9	1.670294792374731e-5	7.369721743853209e-8	-0.7919440956913043	0.09749771705140849	-8.122693737266985	9.154963160286614e-14	5.305301151386093e-10	7.664078574387522e-13
ENSMUSG00000068328	Aup1	-0.08790282009113602	0.013238742646244195	-6.639816366252416	2.7334417870613767e-9	1.7343688138904437e-5	7.621206338501635e-8	0.814518101406508	0.11655863737997194	6.988054422352618	5.0808236729238305e-11	2.800041926148323e-7	3.1244691371811965e-10
ENSMUSG00000046959	Slc26a1	-0.13582454881435982	0.015253298208975077	-8.904601939431062	2.7686874478201478e-9	1.7564553168971017e-5	7.686904390994335e-8	0.20389506486822873	0.10919158806009754	1.8673147674709858	0.06353912842911077	1	0.09446169567635537
ENSMUSG00000003617	Cp	0.09188000274692214	0.014058891023656272	6.535366309641332	2.919412669412588e-9	1.8517834562084047e-5	8.071317380140685e-8	0.12078585067486038	0.12223748676535401	0.9881244605979164	0.3244047521048201	1	0.39441671634325876
ENSMUSG00000016528	Mapkapk2	0.09373745829092689	0.01438530724494332	6.516194384647377	3.2519244776207843e-9	2.0623705037071014e-5	8.952997097382746e-8	-0.2539957950828522	0.12569260840976462	-2.020769544815335	0.0447674615135713	1	0.06876048010254415
ENSMUSG00000052146	Rps10	0.13278789203680408	0.015515562202911181	8.558368062994786	3.3577649083680574e-9	2.1291587283961852e-5	9.205872123775758e-8	0.2978130247071144	0.10465368363924145	2.8457003552185047	0.004981319139307375	1	0.009418701131219117
ENSMUSG00000027690	Slc2a2	-0.14446209513229732	0.01691210042229379	-8.54193692829929	3.540646469200635e-9	2.2447698614732027e-5	9.666993264456504e-8	-0.03801115944870476	0.1121506714356907	-0.3389293970522599	0.7350696188343973	1	0.7826352809021421
ENSMUSG00000071014	Ndufb6	-0.09368563446285183	0.01503134646227774	-6.232684124337282	3.6092623362325117e-9	2.287911394937789e-5	9.774998392228603e-8	0.05631735390732635	0.12463883230418488	0.4518443639610015	0.6519207997046099	1	0.7079780264162954
ENSMUSG00000060961	Slc4a4	-0.13246451205795523	0.014040712874980023	-9.434315282808866	3.609915819622417e-9	2.287964646476688e-5	9.774998392228603e-8	-0.32954099727140973	0.10735013158551901	-3.0697773016597134	0.0024820403315184455	1	0.004975513822811167
ENSMUSG00000036676	Tmtc3	-0.09379275942588085	0.014781393640311743	-6.345325867656329	3.659464109190913e-9	2.3190024059942816e-5	9.868554851834512e-8	0.24185507773893156	0.1260128338910363	1.9192892523000034	0.05651435868247288	1	0.08501702792196422
ENSMUSG00000026576	Atp1b1	-0.12943736255370067	0.012794058360635777	-10.116990160991303	3.91402239241748e-9	2.4799245878357155e-5	1.0511945853921233e-7	-0.6364830038190473	0.10019958241487938	-6.3521522593145185	1.9175493931657156e-9	1.0088227357444829e-5	9.558693187144248e-9
ENSMUSG00000036333	Kidins220	-0.13192889341930064	0.01500059194165853	-8.794912489614328	4.167142727897337e-9	2.639884918122963e-5	1.1146259816896128e-7	0.3991577616131404	0.10748196147163798	3.713718619830631	2.751329044321867e-4	1	6.521522014278777e-4
ENSMUSG00000006333	Rps9	-0.0745678672245017	0.012047658741423257	-6.189407321782472	4.3080120584672856e-9	2.7286948378331788e-5	1.1476404593001919e-7	1.1378233047730582	0.09953389887805882	11.431515469589216	3.859317334137585e-23	2.437158896507885e-19	9.546732352866658e-22
ENSMUSG00000071074	Yipf3	-0.09587020003572495	0.015341399304630026	-6.249117054582588	4.381755626893525e-9	2.7749658385116694e-5	1.1625787106838465e-7	0.23382623015581877	0.1289480309114477	1.8133369583316394	0.07143420535296661	1	0.10494241375809786
ENSMUSG00000009907	Vps4b	0.09548108367300207	0.014743613241600435	6.476097962444753	4.561944486694464e-9	2.8886232489749346e-5	1.2055258924678546e-7	0.1330863231101558	0.12808003730180725	1.0390871670075468	0.3001476011917623	1	0.3696371356619495
ENSMUSG00000040966	Slc22a2	-0.12900416115751223	0.014741118324389468	-8.751314406321013	4.661204037770467e-9	2.9510082763124828e-5	1.226828902741187e-7	0.6897920697850741	0.10285994020954808	6.7061294064513115	2.8585497040039307e-10	1.5430451302213218e-6	1.589962557256624e-9
ENSMUSG00000022820	Ndufb4	-0.09274628655344773	0.015028442235840152	-6.171383906461336	4.7422530239075024e-9	3.001846164133449e-5	1.2431882429207717e-7	0.3634197657462896	0.12417240336759909	2.926735376703826	0.0038639174071631232	1	0.007473420499451309
ENSMUSG00000023022	Lima1	0.08510420146530212	0.013879336806048704	6.131719595435796	5.153230093189784e-9	3.261479325979814e-5	1.3455656354439992e-7	-0.46191685670898636	0.11265844278736868	-4.1001530402901745	6.226319574579307e-5	0.25440741781731047	1.6420514148589915e-4
ENSMUSG00000020869	Lrrc59	-0.09377009907502065	0.013587237838709442	-6.901336400241244	5.222199327975633e-9	3.304607734742981e-5	1.3581846473549276e-7	0.40075532067404374	0.12430354180481734	3.224005646623599	0.0014976730140562344	1	0.0031264874468559713
ENSMUSG00000031634	Ufsp2	-0.08860665210585301	0.014357907629981856	-6.171278879161099	5.646466945728983e-9	3.572519636562728e-5	1.4627461615313666e-7	0.4334801718791114	0.12006962060186988	3.610240206525319	3.9561115171005953e-4	1	9.114570652143528e-4
ENSMUSG00000038178	Slc43a2	-0.1228266088367134	0.012485731505568849	-9.837357849792832	5.757386694654823e-9	3.6421228230386415e-5	1.485631547091323e-7	-0.7043947280795884	0.10080720584442757	-6.987543421912294	6.034979305401354e-11	3.3216526096929056e-7	3.687108990672322e-10
ENSMUSG00000027099	Mtx2	-0.09005203733298073	0.014751343064511528	-6.10466700822829	6.126693926707233e-9	3.875133908642325e-5	1.5747517983489683e-7	0.21385324917965376	0.1206901769825033	1.771919260758533	0.07808787691764621	1	0.11355099008135072
ENSMUSG00000047676	Rpsa-ps10	-0.08540376469518571	0.013826426273883677	-6.176850257864704	6.163190265730988e-9	3.8976015240482766e-5	1.5779685583077783e-7	0.5974544633560533	0.11623940026198411	5.1398618885635265	7.068201703680035e-7	0.0033262957217518245	2.48046758454478e-6
ENSMUSG00000070544	Top1	-0.1315536364448319	0.016148811587472434	-8.146335458324726	6.344577435194074e-9	4.0116763122732134e-5	1.618113159828566e-7	0.12164661215151915	0.10724585973553163	1.1342779334465665	0.2582287922686598	1	0.3248223003494134
ENSMUSG00000026456	Cyb5r1	-0.08844712804938752	0.014218928299575408	-6.220379355315312	6.394894055052574e-9	4.0428520216042376e-5	1.6246487599322757e-7	-0.43749868013333737	0.12097966576810383	-3.616299295882858	3.869857916983981e-4	1	8.92835381968955e-4
ENSMUSG00000059412	Fxyd2	-0.12733338714211923	0.014859679416677415	-8.569053448031292	6.505233928096138e-9	4.1119583659495684e-5	1.6463245864181762e-7	-0.4238235165342052	0.10438922221399378	-4.060031366699751	7.482040106730304e-5	0.30354636713004846	1.9502370497770407e-4
ENSMUSG00000035699	Slc51a	-0.13360219175203397	0.017096830743976558	-7.814441971890247	6.6506497184659695e-9	4.203210622070493e-5	1.676677208716708e-7	0.37963651847650753	0.1090570397975214	3.481082185811683	6.281878535210994e-4	1	0.0014011783309046894
ENSMUSG00000002504	Slc9a3r2	0.13686785753007794	0.016138753638055822	8.480695634843702	6.722996919613424e-9	4.248261753503723e-5	1.6884473179792492e-7	-0.42769050170923856	0.10954593736086608	-3.904211438716719	1.3637756477360657e-4	0.5373276052080099	3.397820432451084e-4
ENSMUSG00000029397	Rchy1	0.07946986523493789	0.013075152931822525	6.077930074647372	6.800717684110352e-9	4.2966934328209204e-5	1.7014723331348334e-7	-0.4396705674651038	0.128457346853265	-3.422696935873456	7.633102100211805e-4	1	0.0016722151939173198
ENSMUSG00000089774	Slc5a3	-0.11607424146201817	0.012195290694477067	-9.517956100430242	7.368284262399339e-9	4.6545451685576625e-5	1.836489032067714e-7	-0.9530825061705825	0.09551263039715441	-9.978601805934323	8.210831332728631e-19	5.0480191033615624e-15	1.2477429600312793e-17
ENSMUSG00000020048	Hsp90b1	0.095254216885029	0.013501386206891269	7.05514348122344	7.4155869136907075e-9	4.683684694687051e-5	1.8413042223428247e-7	-0.12491725552938042	0.12618319348912918	-0.9899674598118503	0.3234985317131742	1	0.3936786274593465
ENSMUSG00000069520	Tmem19	-0.09161203780831598	0.014626501758904625	-6.2634278051170025	7.570875253628075e-9	4.7810077226661296e-5	1.8727954574764185e-7	0.20817843660106314	0.1262087436133272	1.649477133207752	0.10077559833853375	1	0.14196177201189297
ENSMUSG00000041308	Sntb2	-0.12126696540948194	0.01509407347351728	-8.034078118292333	7.637915795430548e-9	4.822580033234848e-5	1.8823028439675284e-7	-0.4782545026027715	0.10561675909659772	-4.528206571509708	1.073654920911118e-5	0.04703682208511608	3.2112042634523435e-5
ENSMUSG00000052459	Atp6v1a	0.09360190688529432	0.015451890530068796	6.057634611321414	7.739372980973688e-9	4.8858661628886896e-5	1.9001893363733906e-7	-0.24048083194611575	0.1261768415923198	-1.9059030873756908	0.058246567885917575	1	0.0874030596782982
ENSMUSG00000028048	Gba	0.06946900676687437	0.011490728380945517	6.045657373824208	8.039989461604749e-9	5.074841348164918e-5	1.9598732012438895e-7	-1.0333741294912488	0.1128911064309844	-9.153724878434057	1.0196741688274441e-16	6.142517193016523e-13	1.2045702030313433e-15
ENSMUSG00000006360	Crip1	0.1265614984295109	0.014308741707567092	8.845047385444076	8.0420328926421e-9	5.07532695854643e-5	1.9598732012438895e-7	-0.2798199052528225	0.10503765475932865	-2.663996124951286	0.008538464138249364	1	0.015379987415735236
ENSMUSG00000037710	Cisd1	-0.12962590466894616	0.012417785866759531	-10.43872925977363	8.079535188206442e-9	5.0981867037582645e-5	1.961746920236103e-7	0.40163046023444315	0.10043515233067855	3.998903281513345	1.0653126417007549e-4	0.42484668151026106	2.703338674273416e-4
ENSMUSG00000039952	Dag1	-0.12190087446779843	0.0131551417490889	-9.266405242363964	8.151651448497137e-9	5.1428768988568436e-5	1.9719803871732043e-7	-0.26270855184991665	0.10878020168353437	-2.415040124803168	0.017093253814748	1	0.028906093575184234
ENSMUSG00000021252	Erg28	-0.08850700567211624	0.014442237362797762	-6.128344483528872	8.21354140447658e-9	5.1811019179438266e-5	1.9796740821046115e-7	0.47190161930869934	0.12182987904518698	3.873447326773344	1.496261817042308e-4	0.586085753735472	3.695721755307202e-4
ENSMUSG00000000320	Alox12	0.09139323555458162	0.014194237352039538	6.438756326802547	8.29776650823988e-9	5.233401336746892e-5	1.9926753147524967e-7	0.10126586574965006	0.12604583693132285	0.8034050803663245	0.4227865890170558	1	0.4929014450269715
ENSMUSG00000023307	March5	-0.08598994674288261	0.013802635190046385	-6.2299659129506875	8.366296538702246e-9	5.275786597305636e-5	2.0018265899876645e-7	0.6364351893379324	0.11891280174876152	5.352116676912466	2.594898787896831e-7	0.0012502222360086931	9.68487465930865e-7
ENSMUSG00000041644	Slc5a12	0.13275065685739015	0.014277247000498306	9.29805703107587	8.755376103367913e-9	5.520264633173469e-5	2.087332418846408e-7	-0.12862323834158615	0.11430234095750651	-1.1252896245528659	0.2624803477288214	1	0.3294774299991692
ENSMUSG00000054469	Lclat1	-0.09041446709801135	0.014474370085638484	-6.246521718255695	8.969091924858561e-9	5.654115549430837e-5	2.13056407456929e-7	0.4411092612915066	0.12519564272898864	3.5233595329381955	5.389059628090081e-4	1	0.0012148000120874524
ENSMUSG00000021866	Anxa11	-0.07585550520051572	0.012127116236721696	-6.255032418244687	9.526275791441563e-9	6.004411631345617e-5	2.2547803851685427e-7	-0.9961351891573446	0.1050509219918778	-9.482403107650617	1.392230861302033e-17	8.450841328103341e-14	1.792735629621796e-16
ENSMUSG00000020120	Plek	0.09023399168896687	0.013982635024862527	6.453289492897568	9.641476836242238e-9	6.0760587021998584e-5	2.273868013708743e-7	0.26464783226636546	0.12511978119602699	2.115155810988335	0.03577354931170486	1	0.0564348967803927
ENSMUSG00000020744	Slc25a19	-0.09161618797925104	0.014978672157096942	-6.116442567029749	9.718103747342767e-9	6.123377171200677e-5	2.2837543806255503e-7	0.20853015937297878	0.12698193300432611	1.6422033783804064	0.10227719789504869	1	0.1437999919122693
ENSMUSG00000027359	Slc27a2	-0.08506455123545961	0.013832480685698673	-6.149623713077539	9.951374108633245e-9	6.269365688438944e-5	2.3302505919860055e-7	0.754576069687539	0.11819361969433421	6.3842369126098495	1.3948377957543824e-9	7.378691939540683e-6	7.10924298688136e-9
ENSMUSG00000029310	Nudt9	0.08011013645630287	0.013349548508127952	6.000962235354052	1.012842562489187e-8	6.379895301119389e-5	2.3632993124747694e-7	0.10159975347890113	0.13115315682996356	0.7746649484817387	0.43952662424312494	1	0.5084537952742197
ENSMUSG00000016319	Slc25a5	-0.09185448066072488	0.01515189481550249	-6.062243816974298	1.0443375035831216e-8	6.5772375975665e-5	2.4281769517939713e-7	0.3040147995344409	0.12712593814562487	2.3914458683182884	0.017804183625989536	1	0.029985034107758164
ENSMUSG00000092329	Gm20388	-0.13400879388694092	0.01508204665276136	-8.885318880936186	1.061879882406087e-8	6.68665761951113e-5	2.4602709951521314e-7	-0.35695757016724244	0.11182432833160319	-3.1921280055331307	0.001715074480499634	1	0.003537677141594856
ENSMUSG00000025314	Ptprj	0.0891718227143375	0.014340937885717648	6.217991000654499	1.0782734440523103e-8	6.788809603753346e-5	2.4894874603032285e-7	-0.3462473054886271	0.12451954179438485	-2.7806663958045577	0.005995129516840181	1	0.011143489327911975
ENSMUSG00000035878	Hykk	0.048740103490088	0.008149511612674394	5.980739191080574	1.1239973016127621e-8	7.075563013652337e-5	2.5859798058083826e-7	1.5243946625395552	0.08006519276467879	19.03941787812757	1.8579035766937764e-45	1.2225005534645048e-41	1.2225005534645048e-41
ENSMUSG00000005103	Wdr1	0.07747011688816731	0.012957429611869612	5.978818269419813	1.1351569464805003e-8	7.144677821148269e-5	2.6025549504674885e-7	-0.5335836530679742	0.12730076953269662	-4.191519462346421	4.289088753838946e-5	0.1778256197341627	1.1590227515507295e-4
ENSMUSG00000017756	Slc12a7	-0.12839048437245082	0.01614760870618697	-7.951052487620529	1.2077237165922578e-8	7.600205348515078e-5	2.7593132136031446e-7	0.40545538980802054	0.10978669628060755	3.6931195085031367	2.96926061914608e-4	1	6.997756043689544e-4
ENSMUSG00000045659	Plekha7	-0.11855717070098279	0.014749257264856338	-8.038179046715378	1.2224715190103099e-8	7.69179079761287e-5	2.783343458507903e-7	-0.6308630651420367	0.10304019795971354	-6.122494692689647	6.201334511917855e-9	3.199888608149613e-5	2.8715539119225534e-8
ENSMUSG00000004552	Ctse	0.0796910234352345	0.013370506117698784	5.960209937733474	1.2490372327129488e-8	7.857693230997162e-5	2.834022410776277e-7	0.03356868153890144	0.13135905567764009	0.2555490473476013	0.7985829666761624	1	0.8373985531042468
ENSMUSG00000041685	Fcho2	0.08697900475684006	0.014562663015687361	5.972740333491445	1.2618739785635332e-8	7.937187325164624e-5	2.844729732341391e-7	-0.007942869022550314	0.11985499656501677	-0.06627065412530891	0.9472353394087956	1	0.9572736190001344
ENSMUSG00000059173	Pde1a	0.08724413343120713	0.014157358882026535	6.162458277579433	1.262402859944812e-8	7.939251586192922e-5	2.844729732341391e-7	-0.42064200049940326	0.12229594418495107	-3.439541706005036	7.225325600618563e-4	1	0.0015905869003703626
ENSMUSG00000029263	Pigg	-0.09619146442720038	0.013490194495141269	-7.130472763891242	1.3681596407527886e-8	8.602987821053535e-5	3.0725223331581396e-7	0.29448896144934217	0.12495422994002335	2.356774649331148	0.0194982660311249	1	0.03257136087453715
ENSMUSG00000028180	Zranb2	0.13134683968956673	0.01645733544314425	7.981051376350406	1.3751841960365805e-8	8.645783040481982e-5	3.077793200653299e-7	-0.0840066297550603	0.10954845360768994	-0.7668445056823998	0.444224051251774	1	0.5131661266216069
ENSMUSG00000004665	Cnn2	0.08569652908130772	0.013907124904188545	6.162059352432914	1.384748242789419e-8	8.704527454174287e-5	3.088692690696399e-7	-0.7578647336615448	0.12033398520271439	-6.298010760508325	2.2060025430185113e-9	1.157268934067511e-5	1.0873031260720451e-8
ENSMUSG00000068323	Slc4a5	-0.1309822893476852	0.010502908552540215	-12.47104920436597	1.4456812696913999e-8	9.086106780010449e-5	3.213710390057234e-7	-0.41030409126038764	0.10255265663685333	-4.000911382659791	1.0414625136331443e-4	0.4162725666991678	2.652021416294926e-4
ENSMUSG00000024388	Myo7b	-0.08857949862526843	0.01470802861383705	-6.022526944361151	1.4512247527612317e-8	9.11949634635158e-5	3.215171337767308e-7	0.27706097483386594	0.12433693496315293	2.228307903166284	0.02708650072631532	1	0.04387719713913215
ENSMUSG00000036181	Hist1h1c	-0.11793833112404299	0.014301075494011673	-8.2468155051295	1.459254119970249e-8	9.168493635773074e-5	3.2221114461088047e-7	0.27047011226323736	0.10070787091866541	2.6856899048305456	0.007980378540433933	1	0.014449887395722423
ENSMUSG00000031207	Msn	0.12424640470191134	0.014425886812958677	8.612739467101713	1.465190193385423e-8	9.204324794847227e-5	3.224398485777954e-7	0.6470978833960837	0.10626608798928441	6.089410983693455	8.460712997415006e-9	4.348806480671313e-5	3.86339288847958e-8
ENSMUSG00000031827	Cotl1	0.06625846210929152	0.008578477935027745	7.723801659353131	1.5334426805255155e-8	9.631553476380763e-5	3.363350945952631e-7	-1.4757791915786818	0.08425961871564155	-17.514667335003324	5.40317780503462e-41	3.545565275663718e-37	1.8712057872172528e-38
ENSMUSG00000053862	Slc51b	-0.08527399219730167	0.01396559571676314	-6.106004636447113	1.53875626827691e-8	9.663389364778994e-5	3.363792772512315e-7	0.62159646950141	0.12053697721364685	5.156894455712588	6.512036671221377e-7	0.0030730301051493675	2.30124604170981e-6
ENSMUSG00000017774	Myo1c	0.12644873990170571	0.013293082613993455	9.512371477221903	1.5490601596243176e-8	9.72654874228109e-5	3.3751045862013276e-7	-0.051418073582666396	0.10852526673039552	-0.473788962992388	0.6364693498056098	1	0.6942918305240239
ENSMUSG00000023829	Slc22a1	-0.12290300288210992	0.016468450454971643	-7.462936675077822	1.6224058661943303e-8	1.0185464027968006e-4	3.5232444222965984e-7	-0.5053011275768378	0.10640791984666595	-4.748717278798212	4.202510978322436e-6	0.018902894380494317	1.3275334727489979e-5
ENSMUSG00000074364	Ehd2	0.09737276113346291	0.012905712739615355	7.54493479732953	1.689859521221092e-8	1.0607248214704795e-4	3.6576564636956535e-7	-0.20059437286828535	0.12445465633551625	-1.6117868047259292	0.10873336800048969	1	0.15193577435617375
ENSMUSG00000021696	Elovl7	-0.0889129987444466	0.014468918708960596	-6.1451032059073505	1.7285745419800902e-8	1.0848533825467046e-4	3.729187044665244e-7	0.2936813286071462	0.1263032222672228	2.3252085206963087	0.021162427410392294	1	0.03509948615343577
ENSMUSG00000060961	Slc4a4	-0.13566312273020592	0.014588319382237524	-9.299434648749664	1.8635349931456943e-8	1.1693682081989231e-4	4.005396428857771e-7	-0.11121366650363665	0.11243760376518575	-0.9891145202266569	0.32398326848366	1	0.3940498903183887
ENSMUSG00000000958	Slc7a7	-0.12105805921317887	0.01687813739503244	-7.172477411447581	1.8737104457922903e-8	1.1755659336900829e-4	4.005396428857771e-7	-0.5498623344861061	0.10737558312519503	-5.1209252465245445	7.772260738997215e-7	0.0036436358344418946	2.701609913502466e-6
ENSMUSG00000020674	Pxdn	-0.07470903050752835	0.012704017365231373	-5.880740584627476	1.8748664135078928e-8	1.1761037011935012e-4	4.005396428857771e-7	0.6682818986469973	0.12481111109175813	5.354346202043602	2.5254494118588904e-7	0.0012174335083916838	9.43637542875156e-7
ENSMUSG00000040808	S100g	0.09165807081046214	0.014845945300411808	6.1739464180781845	1.950350549001773e-8	1.223259864333912e-4	4.153173660981122e-7	-0.10835623928327882	0.12975998838800096	-0.8350512405972028	0.4047853160795315	1	0.47562274639344954
ENSMUSG00000025823	Pdia4	0.08865302917678311	0.014074029155701374	6.299051124309336	1.9579414951098498e-8	1.2278251115833868e-4	4.1558887218783264e-7	-0.417161973600383	0.12580946858318748	-3.3158233501681793	0.0011025200923381337	1	0.002350042827205999
ENSMUSG00000018459	Slc13a3	-0.12933162806168305	0.01578454833637603	-8.193558998684422	1.9872073827442866e-8	1.2459790289806678e-4	4.2044452020763367e-7	-0.3026680238089569	0.11004444220869176	-2.75041626577531	0.006612631191386864	1	0.01218591376794004
ENSMUSG00000031871	Cdh5	0.12804480110994687	0.013218929845988334	9.686472551241033	2.071444926367234e-8	1.298588824339619e-4	4.3686242357360257e-7	-0.34808070257244217	0.10901128084838915	-3.1930704773256107	0.0017694842349375896	1	0.0036441960143628604
ENSMUSG00000049940	Pgrmc2	-0.12351188228690248	0.014833444717303015	-8.326581225116747	2.1092789155792594e-8	1.3220960242850798e-4	4.434202959907836e-7	-0.33199486060875627	0.10616696285979361	-3.127101422757999	0.002095481159938259	1	0.004259581721468565
ENSMUSG00000030846	Tial1	0.09308412747463211	0.012624552163702505	7.37326174169275	2.1452438368300414e-8	1.344424312541387e-4	4.495447275904991e-7	-0.4352533554807259	0.12380115128893643	-3.5157456206921607	5.525720840939571e-4	1	0.0012432040131637404
ENSMUSG00000023073	Slc10a2	0.08648131110528351	0.014607093038832081	5.920501147995575	2.263763673379167e-8	1.418474317739386e-4	4.728750784392038e-7	0.5265497581530534	0.12305616867189687	4.278938340401175	3.03422221576573e-5	0.12771041306157957	8.417024527714377e-5
ENSMUSG00000004591	Pkn2	0.08750053228172494	0.014655836420860751	5.970354046608959	2.3434506081872133e-8	1.4681718060292892e-4	4.879716772744261e-7	-0.5357644008851687	0.1249563416097924	-4.287612729238087	2.92878083275209e-5	0.12350668771715564	8.150176202150992e-5
ENSMUSG00000006529	Itih1	0.07578405875150675	0.013006013944834825	5.826847416352605	2.46455838334428e-8	1.543799371326857e-4	5.115707937667307e-7	0.45775025482768555	0.12777808819534547	3.582384595767961	4.3520981843985445e-4	1	9.957164830786656e-4
ENSMUSG00000001773	Folh1	0.0703857144822769	0.012098146187601385	5.817892542446769	2.578731453243067e-8	1.6150595091661327e-4	5.327376503339799e-7	-0.8893474619863634	0.11885870621978215	-7.482392247664779	2.860670376930985e-12	1.617709098154472e-8	2.032744177128065e-11
ENSMUSG00000020923	Ubtf	-0.12722059224481883	0.014929365562146616	-8.521500241603464	2.5867186131950242e-8	1.619803195582724e-4	5.327376503339799e-7	-0.17982830845779513	0.11187224035181287	-1.6074435256885515	0.10981030899822508	1	0.15324325096456998
ENSMUSG00000090231	Cfb	0.07595978366767966	0.013058314099266749	5.81696711307817	2.5908213998005103e-8	1.6221132784150996e-4	5.327376503339799e-7	0.4298471785859552	0.12829191309004248	3.3505399384313828	9.776527532017714e-4	1	0.0021008997766386855
ENSMUSG00000044708	Kcnj10	-0.11573066852920362	0.013752153088484789	-8.415458131142344	2.625818214911641e-8	1.6437622025346872e-4	5.382518334616385e-7	-0.9139772293520326	0.10078338063701028	-9.06872962164157	2.1652629517274584e-16	1.2976420869702658e-12	2.423032350742632e-15
ENSMUSG00000024127	Prepl	0.07724289690584733	0.013289143958718863	5.812481010499484	2.650218853917994e-8	1.6587719806672723e-4	5.415664614528074e-7	0.26399679053760994	0.13055970999263652	2.0220387327185327	0.044612737528052795	1	0.06853883094433513
ENSMUSG00000019889	Ptprk	-0.12804036654262183	0.015493165550043354	-8.264312811287525	2.662392255067133e-8	1.666125073221012e-4	5.423696915895275e-7	0.134323659822151	0.11695603197542472	1.1484970681150986	0.25249537519300275	1	0.3188520102761011
ENSMUSG00000064105	Cnnm2	-0.11060542761970465	0.014369525168852836	-7.6972221642682594	2.6859793169039322e-8	1.6806172585867905e-4	5.443757621907585e-7	-0.7584085961773983	0.10191240184589331	-7.441769425905836	3.870749346395919e-12	2.184263856171217e-8	2.715301780307585e-11
ENSMUSG00000018417	Myo1b	0.13043129458895547	0.014544920335065832	8.967480851339095	2.6887860594528347e-8	1.6821045587936935e-4	5.443757621907585e-7	-0.05570333753947421	0.11456196594558256	-0.48622889001340586	0.627589899221163	1	0.6864712839264655
ENSMUSG00000019210	Atp6v1e1	0.09039639021566734	0.01555562722978005	5.8111697381517615	2.764779913625291e-8	1.7293698359726193e-4	5.580445347133256e-7	-0.24257227687364985	0.12738535468818077	-1.9042399141363502	0.05846404209140009	1	0.08768939980884718
ENSMUSG00000030231	Plekha5	-0.12154649337285849	0.017461959585475858	-6.9606445243382575	2.7870189147245205e-8	1.7430016292687152e-4	5.607867346200641e-7	-0.5348353011137522	0.10816245131847102	-4.944740939154527	1.756438296070649e-6	0.008076103285332844	5.828221880052885e-6
ENSMUSG00000029777	Gars	0.0841286420550342	0.012528190240381555	6.7151472352220605	2.795411078349255e-8	1.7479705472917893e-4	5.607867346200641e-7	0.742908666356507	0.11696283308617254	6.351664428384424	1.6453010754969205e-9	8.672381968944268e-6	8.264184028068503e-9
ENSMUSG00000021114	Atp6v1d	0.08905020250300233	0.015335165942436921	5.806927870051552	2.8442725407348087e-8	1.7782391924674025e-4	5.688545081469617e-7	-0.4653843883654181	0.12572434220347367	-3.7016251603228505	2.841078378330736e-4	1	6.717317904928582e-4
ENSMUSG00000031591	Asah1	0.09330531319866159	0.012944052757202213	7.208353901891004	2.9193029551512146e-8	1.8248562772650242e-4	5.820913165119694e-7	-0.382455478963498	0.12465214353083899	-3.068182127721521	0.0024809656830352116	1	0.004975513822811167
ENSMUSG00000092232	Gm20521	0.12519145177695418	0.014680200315972478	8.527911682563506	3.019455541787334e-8	1.8871597136170838e-4	6.002422194852163e-7	0.02761927958230003	0.1091299763406615	0.2530860952089217	0.8005364718014382	1	0.838778659944819
ENSMUSG00000028356	Ambp	0.08923067111749738	0.012907553947094004	6.913058158287744	3.0391074041258625e-8	1.8991382168382514e-4	6.010058878953855e-7	0.42451913132721625	0.12382548981210909	3.428366259413753	7.499761053952338e-4	1	0.001644399458014208
ENSMUSG00000027195	Hsd17b12	-0.08257144434188	0.013919296090937632	-5.93215661211772	3.045981418176837e-8	1.9031291900768879e-4	6.010058878953855e-7	0.7692987352800307	0.11932510983495831	6.447081727760971	9.963062372283461e-10	5.2913824259197464e-6	5.160754955482214e-9
ENSMUSG00000032380	Dapk2	0.09034947177180107	0.013306531229413183	6.789859071016923	3.05690340538544e-8	1.9096475573442844e-4	6.010058878953855e-7	-0.28918562169621204	0.1265930228539227	-2.2843725126139613	0.023496870213727736	1	0.038662017005833584
ENSMUSG00000068040	Tm9sf4	-0.1249958805437791	0.014076314929770602	-8.87987240747363	3.0598324079780264e-8	1.9111713220230754e-4	6.010058878953855e-7	0.6536248678420007	0.11029454150606278	5.92617602754232	2.3424766427769794e-8	1.1822479616095415e-4	1.0047911544636587e-7
ENSMUSG00000001924	Uba1	0.08449572266707352	0.014040873856444773	6.017839311923589	3.0867204559225426e-8	1.9276569247236278e-4	6.0448275595149785e-07	-0.5820775295212699	0.122557352941202	-4.749429679674355	4.119401547647947e-6	0.018537306964415762	1.3025306191025224e-5
ENSMUSG00000052151	Plpp2	-0.12108248933392657	0.015327317992256569	-7.89978321028493	3.128233007987695e-8	1.9532686901875166e-4	6.107944567524935e-7	-0.16588066253796405	0.10838792339599967	-1.530434916922546	0.12780981968286853	1	0.17557173559776093
ENSMUSG00000031078	Cttn	0.12034805600743526	0.014781542265655548	8.141779378939383	3.206964352888189e-8	2.0021078455080964e-4	6.243143621894758e-7	-0.581367463080773	0.11058430150580324	-5.257233216328305	4.828046565409032e-7	0.0022952533371954536	1.7388366940553603e-6
ENSMUSG00000028995	Fam126a	-0.07751120172346836	0.013429131452462176	-5.771870057110581	3.252194462612474e-8	2.0300197835627063e-4	6.312519045424803e-7	0.0174570160622475	0.1319350225517071	0.13231525431699429	0.8948787409927278	1	0.9176098045398393
ENSMUSG00000015653	Steap2	0.0854386850494932	0.01458079077203827	5.859674306097296	3.3777981939212417e-08	2.108083852826247e-4	6.537032975294638e-7	-0.6673728563203893	0.12347309463148888	-5.405006315847142	2.0184659849731172e-7	9.7835046291647e-4	7.659461465468922e-7
ENSMUSG00000022708	Zbtb20	-0.1096541162107202	0.012532680139308344	-8.749454625175794	3.429326102782834e-8	2.1398994881364887e-4	6.617292010648402e-7	1.0330376484006372	0.09956166141131817	10.375857872970382	2.323336003346732e-19	1.4358216500682803e-15	3.8123568334218194e-18
ENSMUSG00000020142	Slc1a4	-0.12125817477620233	0.014268946818097475	-8.498046584798336	3.4590677422447195e-8	2.1581123643864806e-4	6.655165422213525e-7	0.4881388141987089	0.11004652792783974	4.435749345211452	1.7572152904171892e-5	0.07566569040536417	5.0824073015143316e-5
ENSMUSG00000029499	Pxmp2	-0.0884407507569743	0.014793649838703325	-5.978291477847106	3.5256824679733365e-8	2.1993207235217673e-4	6.763554122234564e-7	0.15537183635232815	0.12861021772723816	1.208083145320904	0.22858292991520293	1	0.29296370838372326
ENSMUSG00000018209	Stk4	0.0841017559618224	0.01422493019798179	5.912278991270877	3.5722421970713964e-8	2.22800745831343e-4	6.832951644398194e-7	-0.48639223162859324	0.12234446922577212	-3.975596401754904	1.0116843602052526e-4	0.40487608095414207	2.5811877045950224e-4
ENSMUSG00000028973	Abcb8	-0.1259163270409527	0.015221325056071421	-8.272363054931786	3.603213833053613e-8	2.2469641462922332e-4	6.87221652796892e-7	6.292592886970815e-4	0.11234586125050743	0.005601090077488185	0.9955380638421041	1	0.9960679359875364
ENSMUSG00000021704	Mtx3	0.12159015118298594	0.013802196909560494	8.809478083794254	3.6669251768273e-8	2.2863278477518214e-4	6.973516665758275e-7	0.08164590409253294	0.10221360439076309	0.7987772721564566	0.4256563782072932	1	0.4958079250493873
ENSMUSG00000031517	Gpm6a	0.08856474538984657	0.014877996139340759	5.952733456870682	3.702026115425871e-8	2.3078430803564882e-4	7.019980357205255e-7	-0.4244752558892283	0.12836552506169313	-3.3067699110428856	0.0011377639540559362	1	0.002418115897186066
ENSMUSG00000072889	Nfxl1	-0.08956088764430323	0.015318790274323367	-5.846472602632399	4.101884004432553e-8	2.5567042999628104e-4	7.755861134817873e-7	0.16357314867486517	0.13024225439294385	1.2559145988164582	0.21076305440098092	1	0.2726741836331999
ENSMUSG00000024597	Slc12a2	-0.12325688691660597	0.013676720135338341	-9.012167076383388	4.228008837718617e-8	2.634895107666242e-4	7.971432135297563e-7	-0.0029285433824383146	0.1159973712297412	-0.02524663577623774	0.9798938256808194	1	0.9834809903873996
ENSMUSG00000061981	Flot2	-0.12516448806560818	0.01701129675165635	-7.357727626109468	4.5625828308172476e-8	2.842945361882227e-4	8.577655721936425e-7	0.0647991606747607	0.11598105656847953	0.558704693610899	0.5770851562365238	1	0.6404676101843726
ENSMUSG00000051497	Kcnj16	-0.1216787512491384	0.014409751808557046	-8.444194797087418	4.7440500495607e-8	2.955543180876316e-4	8.893404366412936e-7	-0.1911119444331632	0.11449249746296217	-1.669209325222267	0.09689244888181725	1	0.13725561111783802
ENSMUSG00000059119	Nap1l4	0.07625298032564173	0.01339467129909021	5.69278473677969	4.832097087138545e-8	3.0099132755786e-4	9.032726941298757e-7	-0.27742806388516583	0.1315964674390135	-2.1081725770012474	0.03636266096602634	1	0.057227053134765206
ENSMUSG00000010095	Slc3a2	-0.1104578192440565	0.014637429539977419	-7.54625796437664	5.040054491499105e-8	3.138945937305643e-4	9.39477579435244e-7	-0.7784030839423263	0.10256666627481593	-7.589240366423552	1.877393946837482e-12	1.0652333254355873e-8	1.3619903164488016e-11
ENSMUSG00000001435	Col18a1	-0.12596514200236036	0.01664504178742663	-7.567727591859349	5.059202712155798e-8	3.1503655288594155e-4	9.403828770052303e-7	-0.08151549835074534	0.1157090570356183	-0.704486757036251	0.4820919340482701	1	0.5492926278853018
ENSMUSG00000002395	Use1	-0.07486345141214755	0.013180175431644636	-5.680004169929779	5.1496876558360064e-8	3.206195534523498e-4	9.545054866310117e-7	0.45995887920810097	0.1294891444740952	3.5521037773179316	4.8485649909547055e-4	1	0.001100881906158798
ENSMUSG00000032320	Rcn2	0.09428050690605941	0.013031506603604382	7.234812502798593	5.289652853347305e-8	3.2928089012086974e-4	9.776942633434064e-7	-0.21267450164618348	0.12529529607855439	-1.697386161351551	0.0913275657503033	1	0.1304396315686989
ENSMUSG00000026991	Pkp4	-0.11384264172627342	0.015766407480835933	-7.22058223248696	5.3109438437226254e-8	3.305531448332962e-4	9.788798457057386e-7	-0.6486229827315705	0.10561403556281936	-6.141446818834687	5.169810914515947e-9	2.676411110444906e-5	2.4228885909910917e-8
ENSMUSG00000059714	Flot1	-0.12531899211611366	0.01638978416047401	-7.646164884729592	5.34242894794943e-8	3.32459353430893e-4	9.8193247143875e-7	-0.030584483066136335	0.11632636466337434	-0.26291961546844367	0.7929397970312145	1	0.8330742239286909
ENSMUSG00000064225	Paqr9	-0.08604298232433533	0.014930086277527241	-5.763059953233303	5.6007299142184525e-8	3.484774152626721e-4	1.026540468957031e-6	0.312940847254167	0.12694285542829942	2.4652103987917933	0.014621281842103933	1	0.02511127788582269
ENSMUSG00000033149	Phldb2	-0.12311573527757924	0.017008633055847912	-7.238426208227802	5.65239176011166e-8	3.5163529139654637e-4	1.0329708029471508e-6	-0.3873194263698286	0.1137032931282126	-3.406404649450958	8.19397806769677e-4	1	0.0017847194864430568
ENSMUSG00000011254	Thg1l	0.08946932436931614	0.013302465644542733	6.72577000084345	5.6672106362298094e-8	3.5250050157349417e-4	1.0329708029471508e-6	-0.20536549343635777	0.127635323144699	-1.6090020252742792	0.10933801239823658	1	0.1527157974061551
ENSMUSG00000092511	Gm20547	0.07258718845403198	0.012834572346428971	5.655598526757947	5.8137955113521364e-8	3.6155994285098935e-4	1.0567617255441176e-6	0.5720419865608977	0.12609375356566024	4.5366401616636844	1.0259527709336677e-5	0.045049586171697346	3.082543028650015e-5
ENSMUSG00000053644	Aldh7a1	0.07623923808701696	0.013498707310793206	5.647891781908488	6.040374394318258e-8	3.7559047983870927e-4	1.0949218599067256e-6	0.046223386915083625	0.13261857326907503	0.34854384099954977	0.7278281219779652	1	0.7772004288567042
ENSMUSG00000028992	Nmnat1	-0.12653166820959175	0.012802834678769083	-9.883097875146273	6.107208350800926e-8	3.796851431692935e-4	1.1039953557217059e-6	0.12105792258803272	0.11163125741182912	1.0844446743211609	0.2800245807080517	1	0.3480471743594598
ENSMUSG00000001763	Tspan33	-0.07458094236277867	0.013214193989923177	-5.644002382563195	6.157975095093855e-8	3.8277973191103403e-4	1.110122633581303e-6	-0.29693722879576884	0.12982336111867449	-2.287240341315241	0.02331375876609492	1	0.038379918108807747
ENSMUSG00000017390	Aldoc	0.07230133418488807	0.012819328846567054	5.6400249225410874	6.280550432728057e-8	3.903362093940488e-4	1.1291262799822574e-6	-0.6549598020720448	0.1259439932103336	-5.200405238685937	5.238744306442292e-7	0.0024836886756842906	1.8734205182820806e-6
ENSMUSG00000002763	Pex6	-0.08272153713076505	0.014191061718610934	-5.829129544428625	6.304227815938311e-8	3.9174471648240663e-4	1.1302947964270867e-6	0.7283857906196582	0.12249200765328666	5.946394418494246	1.3770309615665743e-8	7.022857903989529e-5	6.118071388999364e-8
ENSMUSG00000032492	Pth1r	-0.0726182106861307	0.012886301849895813	-5.6353026284820285	6.42917595172435e-8	3.994447018806339e-4	1.1495646131072344e-6	-0.5508324241106741	0.1266019720778288	-4.350899240116488	2.238342151854069e-5	0.09553244304113166	6.367614076610365e-5
ENSMUSG00000027131	Emc4	-0.12188650956967104	0.013756760261358063	-8.860117298986676	6.611851269215389e-8	4.1072820084365997e-4	1.1790238848627982e-6	0.5785999073631982	0.10862533744330251	5.326564878707061	3.944938965926432e-7	0.0018856808257128345	1.4412936366349762e-6
ENSMUSG00000026709	Dars2	-0.08749543385155616	0.015287158376119379	-5.723459631859112	6.67484661640996e-8	4.1457472334522266e-4	1.187040290161555e-6	0.22536554133629869	0.12970331333745874	1.7375465247364068	0.08398596446318973	1	0.12116370229506435
ENSMUSG00000004768	Rab23	0.07957418036346747	0.013882155643766856	5.732119881482283	6.775930461556408e-8	4.207852816626529e-4	1.2017687988420797e-6	-0.8528206951688192	0.11820589431747544	-7.214705324916602	1.414758064039265e-11	7.895764755403137e-8	9.309108061378363e-11
ENSMUSG00000002804	Nudt14	0.08696922711290242	0.014177789862710526	6.1341879062295215	6.843178495134038e-8	4.248929527628724e-4	1.2104331854296228e-6	-0.36771797404361045	0.12803308015952405	-2.8720544220716135	0.004561916552685929	1	0.008713326826320294
ENSMUSG00000021457	Syk	0.08909647546529781	0.013264153516627752	6.717087174361165	6.959478013075276e-8	4.3204439505171316e-4	1.2277041642368717e-6	0.04419633609418815	0.1278623239671415	0.3456556608930859	0.7299980544855598	1	0.7787592734297962
ENSMUSG00000025790	Slco3a1	-0.06355985117791743	0.011015005717509768	-5.7702967032400965	7.049292261204216e-8	4.375495706529457e-4	1.240223076971223e-6	1.3623342816404556	0.09486824226144915	14.360277466572779	9.323663857943692e-32	6.043598912719101e-28	6.196940220734292e-30
ENSMUSG00000069622	Gm10273	-0.08533485033198332	0.014500935797815351	-5.884782301073252	7.107641392319606e-8	4.4110022480735474e-4	1.2469741972090113e-6	0.4101844122108998	0.12760489424387672	3.214488085597728	0.0015458376334812464	1	0.0032158114537801457
ENSMUSG00000074698	Csnk2a1	-0.13284730795959837	0.01499987810763808	-8.856559167100915	7.12556684119435e-8	4.4214142249610945e-4	1.2469741972090113e-6	0.4716871162093755	0.10858068592869702	4.3441161950213125	2.385684539123359e-5	0.1015585908304814	6.754648996313124e-5
ENSMUSG00000025401	Myo1a	0.12297218959963281	0.015511095997574768	7.9280142176194435	7.246025276321555e-8	4.4954340814298924e-4	1.2646908837717726e-6	-0.05649212104838691	0.1134437726069782	-0.49797463316123836	0.6192026253412404	1	0.6790588791242269
ENSMUSG00000062762	Ei24	-0.08546146678548272	0.012876397269613826	-6.6370635354003635	7.307344534439388e-8	4.532745814712752e-4	1.2720192337727823e-6	0.616290529690375	0.12237396130060434	5.03612470447446	1.1333466344839385e-6	0.0052655284638123785	3.853964266100421e-6
ENSMUSG00000061273	Mmgt1	-0.07862492438301374	0.013916062250226647	-5.649940548500579	7.556891080887821e-8	4.686783848366627e-4	1.3119879501910782e-6	0.8320748020511256	0.1165353697742621	7.140105220096851	2.1661297342580775e-11	1.2035016803537878e-7	1.3899762839960127e-10
ENSMUSG00000026893	Gca	-0.06952144707991906	0.011192899025290417	-6.2112100647772275	7.639036357637128e-8	4.736966445370783e-4	1.3227594535066393e-6	-1.1255863111452407	0.10330679364487091	-10.895569124084657	1.2731210573357393e-21	7.991380876896435e-18	2.755637025417488e-20
ENSMUSG00000052609	Plekhg3	0.11284868186039738	0.013721657385511017	8.224129104080141	8.057433346705454e-8	4.995608674957381e-4	1.391546231530758e-6	-0.21164333981399505	0.11032095364052635	-1.9184328346509867	0.05723661796126035	1	0.08600524005140285
ENSMUSG00000002393	Nr2f6	-0.08664240918587968	0.014970201297092218	-5.787658259659403	8.303060026212356e-8	5.147066910249039e-4	1.428382778401164e-6	0.3946250389273834	0.12916384252493332	3.055228392196573	0.002588552592072442	1	0.005166113453392984
ENSMUSG00000021192	Golga5	-0.12301508130852887	0.014173841175702749	-8.679022135467783	8.314142919873036e-8	5.153105781737308e-4	1.428382778401164e-6	-0.12637408002682593	0.11703957640378583	-1.079755104297679	0.2823048931407313	1	0.3507489042420718
ENSMUSG00000025232	Hexa	0.08334592803242617	0.014194877686662173	5.871549573881843	8.446559071798501e-8	5.234332656793531e-4	1.4443142751960666e-6	-0.5520596782090968	0.1252750343828322	-4.406781294683497	1.7881488235681848e-5	0.07689039941343194	5.158272362594764e-5
ENSMUSG00000020407	Upp1	0.08429372621528955	0.013917567201655682	6.05664229918442	8.450775014445071e-8	5.236100198950166e-4	1.4443142751960666e-6	-0.6178719606064517	0.12491549763808212	-4.9463194902894525	1.7128152271665195e-6	0.007880662860193156	5.692082926644292e-6
ENSMUSG00000022766	Serpind1	0.11244673528022299	0.01474656157793013	7.6252850324452615	8.999195760600741e-8	5.575001773692159e-4	1.5319126756540249e-6	0.5754590555626559	0.1080769254169572	5.324532071416298	3.011520088247916e-7	0.0014461319463766494	1.1138730849168795e-6
ENSMUSG00000022180	Slc7a8	-0.10242897668349336	0.014074738741870575	-7.277504652983722	9.018453102666887e-8	5.58602985179187e-4	1.5319126756540249e-6	-0.9934809610370401	0.09832083012319587	-10.104481011726708	3.195881004826775e-19	1.972178168078603e-15	5.128999271161019e-18
ENSMUSG00000015165	Hnrnpl	0.12347123532472414	0.014158816017579826	8.720449165482492	9.033162889874797e-8	5.594237777699462e-4	1.5319126756540249e-6	-0.02162862015520999	0.11498011016253269	-0.18810749202306704	0.8510735677844148	1	0.8816221782149637
ENSMUSG00000040249	Lrp1	0.11823609167140507	0.0141446072093414	8.359093322387874	9.093588537253467e-8	5.630750022267347e-4	1.5381956960187097e-6	-0.38012189970596266	0.11420994346710765	-3.328273249828176	0.0011078308006538117	1	0.002360598014346529
ENSMUSG00000031751	Amfr	-0.07480655836064098	0.013466889209776244	-5.554850655958126	9.557620215349844e-8	5.917122675323088e-4	1.612542077359025e-6	0.23813818651228716	0.13230597510216563	1.7999050029932415	0.07350497626223641	1	0.10774398391746838
ENSMUSG00000026621	Marc1	-0.08407681051462482	0.014613389981579327	-5.753409073500843	9.709858871138012e-8	6.010402641234429e-4	1.6340376309996963e-6	0.21331743023703992	0.1272925951427699	1.6758039224338666	0.09549251912738248	1	0.13562287413299734
ENSMUSG00000005262	Ufd1	0.11877670480314295	0.015250064627835435	7.788603373283008	9.760897903159977e-8	6.04101971226571e-4	1.6384364337447103e-6	0.49673365060358754	0.1115608799201984	4.452579174338805	1.578390230102112e-5	0.06821802574501327	4.5975244418202284e-5
ENSMUSG00000030286	Emc3	-0.11700299032775759	0.01333085332228814	-8.776856777213036	1.0053567962112469e-7	6.221147854955195e-4	1.6832691397124693e-6	0.693028508468662	0.10731246059990315	6.458043218788029	1.8575984208498837e-9	9.774682890512087e-6	9.266867027439146e-9
ENSMUSG00000016921	Srsf6	-0.0872712665375253	0.013439146117892146	-6.49381037842405	1.0147506624992553e-7	6.278262348882892e-4	1.6946851165596699e-6	-0.11594274688106823	0.12835893666949283	-0.9032697674927408	0.3675694217375155	1	0.43831221367032475
ENSMUSG00000002014	Ssr4	-0.11311074961294988	0.012869931154807848	-8.78876104715563	1.0299670290571498e-7	6.371376041747528e-4	1.7157425446065939e-6	0.741030539950513	0.10697953935148548	6.926843623020549	1.8068825933213275e-10	9.820406894701414e-7	1.0362343625095663e-9
ENSMUSG00000026275	Ppp1r7	0.08595689701654635	0.012691971099740264	6.772541186948135	1.0455752953500057e-7	6.466883201739786e-4	1.737344808940161e-6	-0.5799506772725384	0.12352606437897422	-4.6949660396632344	5.21071316916833e-6	0.023328362858366612	1.6295861527151908e-5
ENSMUSG00000004266	Ptpn6	0.08540363017378456	0.013762804891764293	6.205394237979089	1.0577433155938655e-7	6.541084663632464e-4	1.7492452640194585e-6	0.22185606010847841	0.12810763518179888	1.7317942040975167	0.08499641113673422	1	0.12243353443075988
ENSMUSG00000038671	Arfrp1	-0.12450633202335346	0.015277861944766324	-8.149460472511016	1.0580541262610097e-7	6.541948662671823e-4	1.7492452640194585e-6	0.03610457945469844	0.12072224735384052	0.29907146566676185	0.7653412997954442	1	0.8096375808125439
ENSMUSG00000078517	Emc1	-0.12291878114268634	0.013469490594447082	-9.125718621709472	1.0889505839140664e-7	6.731892509756758e-4	1.7958132436477586e-6	0.6874084377061943	0.10616980968462353	6.474613072662887	1.7742413560604168e-9	9.343154981014155e-6	8.877952945154024e-9
ENSMUSG00000022817	Itgb5	0.070449736670578	0.01194667204214455	5.897017715230722	1.1019466515513075e-7	6.811132253238632e-4	1.812702241801901e-6	-1.1375620645621067	0.10693835371975847	-10.637549812513384	7.228750367658577e-21	4.511463104455718e-17	1.3989758064468656e-19
ENSMUSG00000031881	Cdh16	-0.11435539352401893	0.0119130771570192	-9.599148231541552	1.1255676866869827e-7	6.956008303725553e-4	1.8469414908729043e-6	-0.5080627222699823	0.11131633452147285	-4.564134495211728	1.0582880624798494e-5	0.04641651442036619	3.172453508481735e-5
ENSMUSG00000035704	Alg8	-0.08441545460888174	0.013719188312628538	-6.153093950257769	1.1390602306836591e-7	7.03825316539433e-4	1.864431919875243e-6	0.40256171393432943	0.1271661124816359	3.165636709956542	0.001813128253724205	1	0.003724753015768114
ENSMUSG00000078622	Ccdc47	-0.11691603786187484	0.013703678505269193	-8.531726559180408	1.2094140854503597e-7	7.471760219912322e-4	1.9746760998172124e-6	0.6472855877011212	0.10888170827642185	5.944851508554902	2.2344680863458064e-8	1.1295236176478051e-4	9.634862390665404e-8
ENSMUSG00000005698	Ctcf	-0.11826215071525166	0.014750979465556868	-8.017240549442194	1.2135328865374215e-7	7.495992640141652e-4	1.976496632033721e-6	-0.3854017411563061	0.11212970187420576	-3.4371066248679973	7.412796271516571e-4	1	0.0016275008163690033
ENSMUSG00000040774	Cept1	-0.12042009529306792	0.01642423600062042	-7.331853687959617	1.221022299017681e-7	7.541033718733199e-4	1.980800749070714e-6	0.33817338447771683	0.11502979066912361	2.9398765529396864	0.0037436289944476	1	0.007262110490408375
ENSMUSG00000043207	Zmpste24	-0.11710271303112196	0.012707677972794248	-9.215114931447436	1.2221962068734192e-7	7.547061577443363e-4	1.980800749070714e-6	0.8906427745129926	0.10424215516760892	8.543978902594114	5.826151952174117e-14	3.387324744994032e-10	4.998185116728252e-13
ENSMUSG00000041959	S100a10	-0.11830791049133571	0.013527950383661459	-8.745442371981456	1.2305924551398913e-7	7.597677818033688e-4	1.9895081952875884e-6	-0.3785924239982728	0.10997612666220684	-3.442496435259305	7.634246873142294e-4	1	0.0016722151939173198
ENSMUSG00000028645	Slc2a1	-0.09552689699876532	0.011164112981968741	-8.556604286704342	1.236991086541773e-7	7.635945977222365e-4	1.994951311138448e-6	-1.1447568442266605	0.09389310292602952	-12.192129225173419	8.982515689901347e-25	5.7110834756392766e-21	2.650446333612146e-23
ENSMUSG00000025243	Slc6a20b	0.08081546236547905	0.014631022163745419	5.523569130100407	1.2509602326766712e-7	7.720926556080415e-4	2.0125472691962093e-6	0.6614464743743659	0.12124684174598253	5.455370753162589	1.5861955841607133e-7	7.727944886030995e-4	6.107177848904325e-7
ENSMUSG00000025016	Tm9sf3	-0.12523077849555067	0.016753703213237783	-7.47481180140524	1.2764128032707778e-7	7.87674340898397e-4	2.0484868891516385e-6	0.2174958774527488	0.11857982452568304	1.8341727045281777	0.06847594814839274	1	0.10095714515268299
ENSMUSG00000031774	Fam192a	0.08588107586043339	0.014765083525232203	5.816497801293866	1.3327741010879046e-7	8.223216203712371e-4	2.133735665488665e-6	-0.051577389700794944	0.1306653051666782	-0.3947290341150791	0.6935053597254236	1	0.7457534347104572
ENSMUSG00000050029	Rap2c	0.08481899777249305	0.014693072102618427	5.772720448120417	1.3553207607901868e-7	8.360973773314663e-4	2.1645656810678227e-6	-0.06686019862126698	0.1299319960169339	-0.5145784000159065	0.6074713346353142	1	0.6684832525706593
ENSMUSG00000024812	Tjp2	-0.06798681156128952	0.012401559465077356	-5.4821179346629405	1.3633792909167813e-7	8.409323466374706e-4	2.172163616036906e-6	-0.7576614907909155	0.1218396017265381	-6.218515819605539	3.258978154647625e-9	1.6966240273095538e-5	1.5595691823695542e-8
ENSMUSG00000026775	Yme1l1	-0.12049688395029183	0.01448761545469286	-8.317233731604894	1.3909447180084805e-7	8.577956075958299e-4	2.2103627022538347e-6	0.5166938728424532	0.11284730534410148	4.578699254420972	1.049736444940628e-5	0.04605193783954535	3.14825241919295e-5
ENSMUSG00000074217	2210011C24Rik	0.09362405050829224	0.011872729085022224	7.885638578783169	1.3940737407831937e-7	8.595858685669172e-4	2.2103627022538347e-6	1.0059709491592561	0.09669050836789488	10.404029993633571	7.754829160870147e-19	4.7684444510190535e-15	1.1811753675584623e-17
ENSMUSG00000072582	Ptrh2	-0.1155075203702256	0.013951899635758366	-8.278981600052708	1.397487210980859e-7	8.615508655696996e-4	2.210448521214916e-6	0.2873923763542459	0.1169475840814	2.457446031157085	0.015289702381931893	1	0.0261331143957237
ENSMUSG00000027706	Sec62	-0.11758455472489367	0.015048425909886386	-7.813744469289906	1.427553750697547e-7	8.799441319299679e-4	2.2525908104532034e-6	0.5983857248938224	0.11361412515463808	5.26682508956849	4.69628881319836e-7	0.002235903103963739	1.6978890324640225e-6
ENSMUSG00000024576	Csnk1a1	-0.1144000895795549	0.017366264678908484	-6.587489693076891	1.4390989498685861e-7	8.869166828040096e-4	2.265375858884042e-6	-0.1620425879135097	0.11667250240871614	-1.3888669958055526	0.16655692118502058	1	0.22167163054155248
ENSMUSG00000030695	Aldoa	0.08588559603922732	0.012975594782796395	6.619010340327378	1.457245794924013e-7	8.979548588321768e-4	2.287238937796722e-6	-0.43875402212922265	0.12646781398605267	-3.469293951563123	6.504401916608454e-4	1	0.0014468885940258154
ENSMUSG00000067995	Gtf2f2	0.11904030838575853	0.015097359614963585	7.8848428746290855	1.4599397475298226e-7	8.994688784531237e-4	2.287238937796722e-6	-0.5097597549598504	0.11348685665497685	-4.49179552579929	1.3284819716754444e-5	0.05778896576788183	3.918158392480692e-5
ENSMUSG00000004530	Coro1c	0.11916537598050952	0.013763035755563726	8.658364193549142	1.5022142482678696e-7	9.253639769330077e-4	2.3478788013307796e-6	0.5278502472779188	0.1095278815043153	4.819323080371293	3.3063514676088604e-6	0.014977772148268138	1.060740743874515e-5
ENSMUSG00000021065	Fut8	-0.12504778008864034	0.016758580161168362	-7.461716857039657	1.5091367141736598e-7	9.294773022595571e-4	2.35310890503855e-6	0.4023245157589262	0.12020262390939815	3.3470526904818265	0.0010208353102523235	1	0.002187266799563754
ENSMUSG00000022651	Retnlg	0.08421184435701652	0.01409833210629492	5.973177800189275	1.5216214898579755e-7	9.370145134545414e-4	2.3669667620012954e-6	-0.09682563595876609	0.12956123120498902	-0.7473349477944573	0.45582144177959794	1	0.5241707596836341
ENSMUSG00000029705	Cux1	-0.13232597044356056	0.015005682994500119	-8.818390371971784	1.5728485414879668e-7	9.684028469941412e-4	2.4408828780638728e-6	0.34641753188414603	0.11794435435612331	2.937126866099641	0.003937790714062795	1	0.007598434867605042
ENSMUSG00000014867	Surf4	-0.11313248434974098	0.012875297325340365	-8.786786160431465	1.651198226345081e-7	0.0010164776281380318	2.5564433716119136e-6	0.768738546784197	0.10964117174713144	7.011403969278627	1.761770184066747e-10	9.578744490770903e-7	1.0133258576188107e-9
ENSMUSG00000032449	Slc25a36	-0.08274715482661647	0.015180897497870147	-5.450741949757961	1.670154099502907e-7	0.0010279798482440393	2.579721590312002e-6	0.09681273856587665	0.12486862349866536	0.7753167757704273	0.4391622650158118	1	0.5082109925789732
ENSMUSG00000026814	Eng	0.06371280587616003	0.011721472391797157	5.435563361540407	1.7086414437667926e-7	0.0010514979444940843	2.632988454329156e-6	-1.019559073798676	0.11515805991067507	-8.853562439220665	6.827354554595847e-16	4.068420579083665e-12	7.22250690823805e-15
ENSMUSG00000021131	Erh	-0.11975807204819042	0.016743946269765976	-7.152320612998732	1.7341442104536376e-7	0.0010670189326921233	2.666044136631994e-6	-0.06906015030981355	0.11893567309090057	-0.5806512757281158	0.5622708242736392	1	0.6261198212422653
ENSMUSG00000029154	Cwh43	-0.07185021651094242	0.01322821325975345	-5.431588915303107	1.7417847958394748e-7	0.0010715460064004449	2.6715487078377024e-6	-0.37065959634204376	0.12996109397859645	-2.852081226733044	0.004837518069816525	1	0.00918904991321961
ENSMUSG00000031012	Cask	-0.08089701383271178	0.010900259804811017	-7.421567493006588	1.763527191498333e-7	0.0010847455754906246	2.6986067255951237e-6	-1.357663535825043	0.08269842800342342	-16.417041636738738	2.239457123617288e-37	1.4643810131333445e-33	3.5084828270004173e-35
ENSMUSG00000031568	Rwdd4a	0.08503825152534096	0.014799217653207155	5.746131553576565	1.7824760780760838e-7	0.0010962227880167916	2.7212743836985223e-6	0.022017854852622837	0.13055157472330564	0.16865254133692406	0.8662576161189708	1	0.894713342110414
ENSMUSG00000020834	Dhrs13	-0.08406987460524236	0.014427901440767076	-5.826895543359956	1.7911636657382367e-7	0.0011013865380624418	2.7282076204994438e-6	0.20701751527020174	0.12964648625343964	1.5967846198740259	0.11204597646102356	1	0.15606742699270426
ENSMUSG00000060147	Serpinb6a	0.07339518561407686	0.012121770619659378	6.0548238303604585	1.799045782112794e-7	0.0011060533468429457	2.7338848143884954e-6	-1.0160954801789297	0.11096393754105008	-9.156988321571003	1.0946023338903998e-16	6.591695254687988e-13	1.2868513008793156e-15
ENSMUSG00000032902	Slc16a1	-0.11254128532963499	0.014919870120517355	-7.543047253130683	1.8122504963592103e-7	0.0011139903801120066	2.7476055912542867e-6	-0.6126810806149547	0.11190372969602691	-5.4750729245506795	1.663854358742977e-7	8.101306872719555e-4	6.39495425264532e-7
ENSMUSG00000001436	Slc19a1	-0.11508284534707856	0.0160907168295105	-7.1521266930765774	1.8189739985221078e-7	0.0011179414194916874	2.751459519603556e-6	-0.6647927406251876	0.10998880245126473	-6.044185642622598	8.80177160363723e-9	4.5214700727884454e-5	4.0107795811587935e-8
ENSMUSG00000040584	Abcb1a	0.057389009045913354	0.010593576994139944	5.417340061591969	1.865836799356659e-7	0.001146556713204667	2.815872967836426e-6	-1.2524787583707355	0.1040770078521231	-12.034154173132158	5.202720323098799e-25	3.3125720297170055e-21	1.5997149404668268e-23
ENSMUSG00000025372	Baiap2	0.08548731350004346	0.015700054732044996	5.445032833265059	1.8868491109390895e-7	0.0011592800937609766	2.8410679977069126e-6	-0.39345105811396486	0.13042093292518853	-3.0167784364773294	0.002922703169904807	1	0.005768262404911106
ENSMUSG00000059316	Slc27a4	-0.11684320079395247	0.014746585013326851	-7.9234073982795605	1.896540980305708e-7	0.0011650451242017964	2.841457012293292e-6	0.0034411194240548033	0.11911596269121785	0.028888818478302145	0.9769927921981444	1	0.9810182470111078
ENSMUSG00000000194	Gpr107	-0.12028500627833369	0.016777076044894482	-7.169604879685709	1.8982286657496113e-7	0.0011658920465034113	2.841457012293292e-6	0.2952680616616102	0.1203093062985588	2.4542412448865334	0.01516690279512655	1	0.02594183009928066
ENSMUSG00000021484	Lman2	-0.11705309877940644	0.015012212887292084	-7.797191503891641	1.900628257289028e-7	0.0011671758128011921	2.841457012293292e-6	0.552372367869398	0.11309900466497207	4.8839719633754965	2.5721192918863485e-6	0.011716003374542318	8.353674699216275e-6
ENSMUSG00000022378	Fam49b	0.08564886811389667	0.01337379973931882	6.404228400556199	1.90438076355827e-7	0.0011692897888247779	2.841457012293292e-6	-0.35968749759627133	0.12681916091443993	-2.8362236037733983	0.005080268331868381	1	0.009586511506651548
ENSMUSG00000026854	Usp20	-0.07245447748505458	0.013409066579306664	-5.403394565649248	1.995565145111295e-7	0.001225077442583824	2.9707734513195296e-6	0.34014217412696385	0.13173789442755102	2.5819615199180546	0.010597484827181687	1	0.018750053821687415
ENSMUSG00000037905	Bri3bp	-0.08387529661974051	0.014614809073313771	-5.739062084149593	2.0068687089448194e-7	0.00123181601355033	2.9808569085455782e-6	-0.08120716875505261	0.13019611497914618	-0.6237295849270138	0.5335854484353155	1	0.5990432094701205
ENSMUSG00000028656	Cap1	0.08230799321033726	0.014507825825352302	5.673351348518724	2.0422360749926112e-7	0.0012533202792229655	3.0265570660926534e-6	-0.22869766155647958	0.12847905569897428	-1.7800384686225976	0.07673539553024745	1	0.11188098882983122
ENSMUSG00000028936	Rpl22	-0.06685057861380984	0.012337784508158757	-5.418361665305691	2.0621747129872183e-7	0.0012653504038889572	3.0492381149339092e-6	1.0981260593581237	0.10221455141418871	10.743343723227351	3.79343362988182e-21	2.3746894523060193e-17	7.775948063745289e-20
ENSMUSG00000006373	Pgrmc1	-0.10357568984582534	0.014887288511239615	-6.957324012873647	2.076044289559227e-7	0.0012736531716445857	3.0628635482734784e-6	-0.7059039669554996	0.10238259595554215	-6.894765271062536	1.0380994752809726e-10	5.674251731885796e-7	6.12618345053704e-10
ENSMUSG00000020705	Ddx42	0.08209245497603047	0.014633442618200515	5.609920858535846	2.1246483578685324e-7	0.0013032593027165577	3.126110315457243e-6	0.06819386893889172	0.12833795570156892	0.5313616581011043	0.5958153868601512	1	0.6580169932090962
ENSMUSG00000032116	Stt3a	-0.12094426300126543	0.014919635688693929	-8.106381786045672	2.1284155339283357e-7	0.0013053572469582482	3.126110315457243e-6	0.5098749112793117	0.11121903961721903	4.584421094033368	9.602850527733646e-6	0.04231015942519445	2.90513822862011e-5
ENSMUSG00000046324	Ermp1	-0.11806274679980043	0.01737485157484166	-6.795036279374741	2.1350412271544182e-7	0.0013092072804910893	3.12885774491672e-6	-0.31363957464088427	0.116689809496565	-2.6878060388822287	0.007904357498445074	1	0.01432800890902716
ENSMUSG00000038717	Atp5l	-0.11980636467953538	0.01602743501966095	-7.475080356436835	2.1400852712989502e-7	0.0013120862798333863	3.1292802411437983e-6	-0.11071231531115863	0.11822479462045374	-0.9364559749635176	0.35048407794693603	1	0.42137845228667437
ENSMUSG00000022565	Plec	-0.1171177658578993	0.0160299578629755	-7.3061805189399145	2.1449372197809857e-7	0.0013148465157257442	3.1294206000352296e-6	-0.3602213602857403	0.11527898679454697	-3.1247790278356247	0.002096529537926019	1	0.004260396652116493
ENSMUSG00000021922	Itih4	0.08538875829129722	0.013624723325495145	6.267192092738812	2.2021650857505676e-7	0.001349706981056523	3.200438511952735e-6	0.14986904533417422	0.12795399871887084	1.1712728545784112	0.2430161340991781	1	0.3089347299792488
ENSMUSG00000015668	Pdzd11	-0.11787542568730222	0.01673106706326146	-7.045302325404955	2.2091783090110556e-7	0.0013537844677619748	3.200438511952735e-6	-0.44709475834696294	0.11794198293254539	-3.7908024541411183	2.0877746318872422e-4	0.8056722304452868	5.046861527486427e-4
ENSMUSG00000031862	Atp13a1	-0.11677249363418109	0.013756008057033966	-8.488835798149369	2.2112477397095187e-7	0.0013548314901200222	3.200438511952735e-6	0.7209068800457008	0.11177061243998153	6.449878588907372	2.237610624948015e-9	1.173403011722739e-5	1.1012324541628973e-8
ENSMUSG00000007029	Vars	0.08251757997126612	0.014003276144107287	5.892733894702941	2.213069183797104e-7	0.0013557261819941058	3.200438511952735e-6	0.21384890390522193	0.12899289834775252	1.6578347075255704	0.09906537794644145	1	0.13989266309862602
ENSMUSG00000009863	Sdhb	-0.1088144088902616	0.01308574210303715	-8.31549391952377	2.2398658773074603e-7	0.0013719178498508196	3.232087165062081e-6	-0.6139188071604388	0.10966450435190125	-5.598154213969192	1.2953991753695276e-7	6.33709276590773e-4	5.044192830101364e-7
ENSMUSG00000027642	Rpn2	-0.11932374710044996	0.013118462958912152	-9.095863400626996	2.2458176675725208e-7	0.0013753387396214117	3.2335843003560584e-6	0.6921352665633579	0.10685874947701128	6.477104307797072	2.3891250651257573e-9	1.250706971593334e-5	1.1679378104403777e-8
ENSMUSG00000026365	Cfh	0.08315770852612703	0.01345891993024714	6.178631640362247	2.2756177676388297e-7	0.0013933607591252554	3.2693373168260918e-6	0.2862681480549999	0.12811637464708675	2.2344384068278766	0.026663417467352672	1	0.04327708113842639
ENSMUSG00000034664	Itga2b	0.08324588786849549	0.014265895899282045	5.835307397181062	2.3045700607826535e-7	0.0014108577912111404	3.303719172102366e-6	0.3168858723393413	0.12866074870803837	2.4629568498659227	0.014709314354169875	1	0.025244467514459513
ENSMUSG00000073563	Csnk1g3	-0.0816299899171174	0.014913369256420958	-5.4736115302698325	2.3458686545705574e-7	0.0014359062034626383	3.3556121189291886e-6	-0.12337407651546611	0.1273311391686912	-0.9689230562212854	0.3338710588091469	1	0.40428258501365233
ENSMUSG00000000171	Sdhd	-0.11819140376374714	0.015504451827913532	-7.623062400114046	2.3973111449160485e-7	0.0014671544206886218	3.4217586406827766e-6	-0.1289673261435993	0.1157027933949324	-1.1146431504327696	0.2667477737636122	1	0.334132943339914
ENSMUSG00000032180	Tmed1	-0.11236060610660734	0.014333086839334283	-7.839246867482599	2.442181632394431e-7	0.0014943709408621524	3.4782586885617652e-6	0.517469363413881	0.11850186659555079	4.36676128638559	2.553625913289932e-5	0.10835034750089181	7.186851372732145e-5
ENSMUSG00000024091	Vapa	-0.1138513000886373	0.014360629192925349	-7.9280161446355875	2.4953842142374256e-7	0.001526676062270457	3.539717712124491e-6	0.6744617495405821	0.11311857438823852	5.962431485617353	1.8218261592476642e-8	9.245767758181895e-5	7.959904467363631e-8
ENSMUSG00000067038	Rps12-ps3	-0.10417947807767214	0.014285872694660919	-7.292482601822939	2.496092733169854e-7	0.0015268599248799996	3.539717712124491e-6	0.7274712021753226	0.1038039200848624	7.008128417314066	6.595499680197954e-11	3.626865274140855e-7	4.010941580009477e-10
ENSMUSG00000040407	Akap9	-0.11738082063472402	0.018373255828086056	-6.388678290501526	2.5366784137649293e-7	0.0015514325178586307	3.589536336037255e-6	0.6454499773825123	0.11637942014891658	5.546083461806293	1.0569185812794502e-7	5.1894702340821e-4	4.159876528876282e-7
ENSMUSG00000010608	Rbm25	-0.08278823637747162	0.015027818027797043	-5.508999125777125	2.573099596940587e-7	0.0015734504035291692	3.6332608042637476e-6	-0.21972557236533202	0.12939184525920003	-1.6981408057453224	0.09119608205360377	1	0.13030840823294523
ENSMUSG00000029390	Tmed2	-0.12023103811524241	0.015004245687428029	-8.01313445673469	2.5971996496192384e-7	0.0015879278657772024	3.659437621947449e-6	0.02027294907121576	0.1190252821500638	0.17032473021703223	0.8650084215231808	1	0.893805812440724
ENSMUSG00000024387	Csnk2b	-0.11758673185164406	0.013668209632149417	-8.602935937934745	2.618688745921952e-7	0.0016008044303820893	3.6818316128560775e-6	0.5073690155441477	0.1138993854008177	4.454536903414276	1.5569959880475973e-5	0.06734007648305858	4.5412382984721585e-5
ENSMUSG00000061787	Rps17	-0.07245296752138547	0.013493001383345568	-5.36967020627555	2.625017061946718e-7	0.001604410428261834	3.682859758552112e-6	0.8572530459986837	0.11195804735635707	7.656913158462728	1.09525230754982e-12	6.247319162264173e-9	8.217514462574476e-12
ENSMUSG00000026568	Mpc2	-0.11947388150297518	0.014558611308269537	-8.206406433497678	2.638716950062626e-7	0.0016125199281832707	3.6942037300876763e-6	0.28493430384123586	0.11531716925393182	2.4708749415605418	0.01473096258365788	1	0.025275028370396045
ENSMUSG00000057113	Npm1	0.11704532459494492	0.013592028486041772	8.611321313455434	2.758148549083627e-7	0.001685228763490096	3.853209650312158e-6	-0.2727658701685199	0.11812044916023637	-2.309218023701376	0.022225965116540226	1	0.0366993351234215
ENSMUSG00000008683	Rps15a	-0.06648673051541745	0.01230665918861807	-5.402500345252783	2.8208202777637795e-7	0.0017232391076858929	3.932414709255439e-6	1.1636144685475078	0.10415261983886749	11.172205464900578	2.145071268115143e-22	1.351823913166163e-18	5.058985284658653e-21
ENSMUSG00000054640	Slc8a1	-0.09836468067973848	0.011425609549194587	-8.609140742663694	2.8357578574311165e-7	0.001732080899318926	3.936752359036017e-6	-1.0333938337546718	0.09985330025443423	-10.34912047094589	1.8088321679875315e-19	1.1191244623338857e-15	3.0208415394309534e-18
ENSMUSG00000089945	Pakap	0.10857297101568236	0.015012999195892664	7.231930782050953	2.835897596022906e-7	0.001732080899318926	3.936752359036017e-6	-0.6887817120306298	0.11244766803258509	-6.12535345624984	7.090233729819004e-9	3.652179394229769e-5	3.2624991567978356e-8
ENSMUSG00000020152	Actr2	0.07314055741454584	0.013707837660293066	5.335674322027398	2.842423297343602e-7	0.0017355836653580032	3.937504272951769e-6	-0.47742157519819867	0.11231712520246905	-4.250657006556856	3.4077487295558464e-5	0.1427505942810944	9.374158294513992e-5
ENSMUSG00000022770	Dlg1	-0.1065343297814927	0.011651624500364574	-9.143302702396502	2.866863944154076e-7	0.0017502204379060634	3.963017805154164e-6	-1.0187652704865784	0.09354730331374533	-10.890375611040051	3.213197956124997e-21	2.0121045601254733e-17	6.627850329561906e-20
ENSMUSG00000017309	Cd300lg	0.068907983775664	0.012936305415250924	5.326712810477303	2.8819208002079727e-7	0.0017591244564469466	3.9754798459891955e-6	-0.6471068829105505	0.12709323404411055	-5.091591915002789	8.697740330560664e-7	0.004063584282437942	2.997963927453597e-6
ENSMUSG00000036371	Serbp1	0.11257886351644052	0.01615746898915199	6.9676051114209265	2.9051171127990583e-7	0.0017729929739412652	3.999094268246403e-6	0.4957497685997621	0.11418682267716442	4.341567240218029	2.4611930651488625e-5	0.10457609333817516	6.944532748147305e-5
ENSMUSG00000037949	Ano10	-0.1183152733722264	0.015110099800126117	-7.830211245278399	2.941432428094753e-7	0.0017948620676234183	4.040631602685486e-6	0.3982623536874036	0.11815472311339466	3.370685006854833	9.688282338272804e-4	1	0.002083297313262583
ENSMUSG00000046519	Golph3l	0.07779688759478276	0.01316321156084603	5.910175281706296	2.9617922266465853e-7	0.0018069894374770816	4.060123510694694e-6	-0.6811470869495948	0.12221500048770025	-5.573350932630775	8.846287772138226e-8	4.3550274702236486e-4	3.51077041861698e-7
ENSMUSG00000047557	Lxn	0.06770913965076537	0.01152164048944532	5.876692621401612	2.9788108486427344e-7	0.001817074617672068	4.074963697311683e-6	-1.1594969271917785	0.10602406945432741	-10.936166977549014	9.850626313461819e-22	6.187178387485368e-18	2.1605707047526255e-20
ENSMUSG00000002320	Tm9sf1	-0.08170002687696694	0.014816341752282011	-5.514183476794027	3.0336077338177626e-7	0.0018501973568554534	4.141315122099767e-6	0.4477253666707905	0.12913352269885162	3.46715056875601	6.564298936407993e-4	1	0.0014582406145025183
ENSMUSG00000031393	Mecp2	-0.11271307730112204	0.015686703809805726	-7.185262032592553	3.1022381222417277e-7	0.0018917448069430056	4.2221620940952005e-6	-0.2955710507400755	0.11347881638659538	-2.6046363555038776	0.01002560565851666	1	0.017790853622718344
ENSMUSG00000041936	Agrn	-0.10922802986244919	0.014446684465274638	-7.560768017395244	3.1056633032554365e-7	0.0018935229159948396	4.2221620940952005e-6	0.6049230237326947	0.11097673954165543	5.450899226550399	2.0555573561101223e-7	9.955064275641323e-4	7.78225972566433e-7
ENSMUSG00000028716	Pdzk1ip1	0.10578445065060067	0.014347574202286065	7.372985088569576	3.2203567066941083e-7	0.0019631294484007285	4.364044145468692e-6	0.4580590918025647	0.11445589945625728	4.002057508425991	1.0238959241363899e-4	0.4096607592469696	2.6113314654331186e-4
ENSMUSG00000030016	Zfp638	-0.11851150567865591	0.017643949997282294	-6.716835271971996	3.223290964586298e-7	0.0019645958429153486	4.364044145468692e-6	-0.061366135594328505	0.12104573702029624	-0.5069665161693302	0.6128395146090879	1	0.6734275227334333
ENSMUSG00000031021	Tmem9b	-0.11273532847207486	0.013546168101375407	-8.322303962891787	3.2744357971620774e-7	0.00199544117479057	4.424186354276482e-6	0.10351899872719039	0.11982682165136682	0.8639050698380064	0.38929442289241933	1	0.46004980291525127
ENSMUSG00000045103	Dmd	-0.10994951738084373	0.015601614717236352	-7.047316535728427	3.301282172724284e-7	0.0020114712278409062	4.4513189951897104e-6	-0.44496787374829405	0.11653159853300711	-3.8184310465994225	1.8534206216472358e-4	0.7185711750126333	4.509150345702557e-4
ENSMUSG00000030287	Itpr2	-0.11441743748216877	0.017627084790020328	-6.491001708175071	3.398349536578655e-7	0.0020702745376837165	4.572830255764325e-6	-0.2873963137893544	0.11691072051995088	-2.4582545767503845	0.014935468228050301	1	0.02559254711994036
ENSMUSG00000028010	Gar1	-0.11818208082930699	0.015563380617215976	-7.593599599985094	3.417727483215087e-7	0.0020817378100263097	4.589519763174545e-6	-0.13937924454231615	0.1145240705892432	-1.2170301302179483	0.2252570422623755	1	0.2891516461346919
ENSMUSG00000064341	mt-Nd1	-0.08256922346697629	0.015417940683708716	-5.355398957671604	3.434603017429796e-7	0.002091673237614746	4.6027877504456325e-6	-0.09457839991374559	0.13031101348229207	-0.7257897654721089	0.46890153297765913	1	0.5363066377529979
ENSMUSG00000079563	Pglyrp2	0.08113614703642659	0.015099422565103625	5.373460255622018	3.458279490644606e-7	0.0021057463818535006	4.624163571977585e-6	0.31646690206192807	0.12826229167387743	2.4673417099593378	0.014538641583188183	1	0.024990663954383034
ENSMUSG00000033629	Hacd3	-0.11005794993333617	0.013772448274881423	-7.991168145032205	3.4646088768768226e-7	0.0021092538842426094	4.624163571977585e-6	0.6883843383830482	0.11341587093685113	6.069559160431207	1.3225205111858835e-8	6.754112250626308e-5	5.903788984805369e-8
ENSMUSG00000055373	Fut9	-0.0771032567503539	0.01447146231987875	-5.327952009690194	3.540873997252566e-7	0.002155330002127637	4.7163868222513936e-6	0.7100294989748805	0.12137731487184518	5.849771019605739	2.249545714038725e-8	1.136470494732364e-4	9.674901489271599e-8
ENSMUSG00000021998	Lcp1	0.10904812179426539	0.013405269951087317	8.134720314634198	3.5669183968837584e-7	0.002170826536343455	4.7336185909504935e-6	-0.524915298893897	0.11482220551945241	-4.5715486522767526	1.1091498628834404e-5	0.048525306501150514	3.308343652662302e-5
ENSMUSG00000030739	Myh14	-0.07377932297622415	0.013968280776113142	-5.281918666926612	3.568198816278792e-7	0.002171248979705645	4.7336185909504935e-6	0.6368028046512658	0.11322653869730666	5.6241479425036385	6.966866091309909e-8	3.4466516322225995e-4	2.8055066634528275e-7
ENSMUSG00000028757	Ddost	-0.12089486675627538	0.012931779508880088	-9.348664402548653	3.6673450289240985e-7	0.0022312127155974214	4.8553582073079615e-6	0.6896126710259547	0.10641302791277411	6.480528602110867	2.7785837607021576e-9	1.4515321565908071e-5	1.347316222949167e-8
ENSMUSG00000034484	Snx2	0.11727681862917318	0.015762576146663015	7.440206317671051	3.722260831821341e-7	0.0022642512639969217	4.918167926382415e-6	0.15340215369790808	0.11511747343306705	1.3325705396679068	0.18452888203981815	1	0.2425005080531263
ENSMUSG00000041459	Tardbp	0.11446638739330002	0.014526563318222727	7.879798193541663	3.759244870697005e-7	0.0022863727303579183	4.957080410658576e-6	-0.09376604763971871	0.11885739127152838	-0.7888953866193414	0.43143606481716024	1	0.5013863134046121
ENSMUSG00000071649	B3gat3	-0.12058033914177282	0.01846302386531552	-6.530909563968772	3.7692571480212643e-7	0.002292085271711731	4.958448686548254e-6	0.09317983049238984	0.12419494061201135	0.7502707439869581	0.45412607039803343	1	0.5224951115962685
ENSMUSG00000071035	Gm5499	-0.1075432912060265	0.013814537510087804	-7.78479128436222	3.775353787174279e-7	0.0022954151026019615	4.958448686548254e-6	0.8439817882058008	0.10970907803118629	7.692907490899591	2.268884420783164e-12	1.2855499128157409e-8	1.6316130588801332e-11
ENSMUSG00000014353	Tmem87b	-0.11548820444151257	0.014098144039400214	-8.191731061816125	3.7914923050079914e-7	0.002304848172214358	4.969724973496531e-6	0.45598401237348024	0.11873217035365341	3.8404419881763707	2.0190947953955204e-4	0.7799763194612895	4.888021984438014e-4
ENSMUSG00000002900	Lamb1	-0.10991075945806726	0.012695870767513594	-8.657205281209126	3.802466938701868e-7	0.0023111394053429955	4.9742012836298785e-6	-0.7306696208311035	0.10576252861407599	-6.908586910750716	1.261787434697012e-10	6.879265093968109e-7	7.350584619099913e-10
ENSMUSG00000034066	Farp2	-0.10201852549959307	0.014662000194402638	-6.958022380775827	3.878698423571408e-7	0.0023570850320043446	5.063856275218227e-6	-0.7911298773904604	0.10977659263459942	-7.2067264833387785	1.5761824136928188e-11	8.788793138751158e-8	1.0319681872735072e-10
ENSMUSG00000005447	Pafah1b3	0.06939744628939401	0.011347688127477622	6.115558121601264	4.076717356585341e-7	0.0024770134658612534	5.311841625016147e-6	-1.099443617694024	0.10958639996615557	-10.032664801778084	3.707050558697143e-19	2.2857673744926585e-15	5.877684982223422e-18
ENSMUSG00000021282	Eif5	0.07872101285806231	0.01327943944092293	5.928037339849576	4.287116823709768e-7	0.002604423470403684	5.57494638340124e-6	0.6370858203998234	0.12270485594683361	5.192017997037251	5.524116661479449e-7	0.0026173264742089626	1.9722565183144205e-6
ENSMUSG00000055943	Emc7	-0.10994888168709467	0.01361807798438295	-8.073744460355034	4.3643877516526535e-7	0.0026509291203538217	5.664234991296738e-6	0.7787052340020624	0.1093108898698644	7.123766304794683	6.455723264078425e-11	3.5506477952431337e-7	3.92957068248252e-10
ENSMUSG00000057363	Uxs1	-0.08122723826303795	0.014739338329839875	-5.5109148352062	4.4926499350015696e-7	0.0027283863055264533	5.818344452818627e-6	0.16697764678547575	0.13066621858670585	1.2778945361051741	0.2029131890455756	1	0.2637109982065746
ENSMUSG00000000959	Oxa1l	-0.10932383470673557	0.014481509044889746	-7.549201838555209	4.5021893392663606e-7	0.002733729366802534	5.818344452818627e-6	0.6254720441927935	0.11366510080305207	5.502762411450733	1.7616027662477953e-7	8.566674252263028e-4	6.74700011752648e-7
ENSMUSG00000021785	Ngly1	0.08100790382008102	0.01352821464845263	5.988070556623433	4.5096590743731e-7	0.0027378140240519088	5.818344452818627e-6	0.29533789037006725	0.12898620117858414	2.2896859328476977	0.02317990850338759	1	0.03817867282910897
ENSMUSG00000029500	Pgam5	-0.0622273364605077	0.01177385685009166	-5.285212590301135	4.5846994957496986e-7	0.002782912593920067	5.897015285355737e-6	1.2984027777030762	0.0993051125799942	13.07488349763625	5.768740910975406e-28	3.7023779166640155e-24	2.3287309935103173e-26
ENSMUSG00000022365	Derl1	-0.06544446659662069	0.012516840941111515	-5.228513081257476	4.5902403322273103e-7	0.0027858168576287545	5.897015285355737e-6	0.8118470457684256	0.12297218905686558	6.601875204425337	4.166568536348201e-10	2.239530588287158e-6	2.2733019045747234e-9
ENSMUSG00000024338	Psmb8	0.08181288099047158	0.013918074846493907	5.878175099128815	4.597521035543302e-7	0.002789775764367676	5.897015285355737e-6	-0.17166323234000916	0.1306109325084928	-1.3143098287645025	0.19038772742869084	1	0.2490559138132775
ENSMUSG00000015002	Efr3a	-0.11309766591149416	0.013729012174874036	-8.237858956704715	4.720175858605613e-7	0.0028637306934160256	6.042559756736369e-6	-0.04259746876515679	0.12115438986884741	-0.35159657698965424	0.7256147903996826	1	0.7754661882134012
ENSMUSG00000041958	Pigs	-0.104695780905268	0.013901185995198125	-7.531427961717293	4.860944425900071e-7	0.002948648888750983	6.210682392703392e-6	0.7755871076810594	0.11291809393584797	6.868581293284076	2.0497903431784808e-10	1.1111913450370544e-6	1.1627259015615866e-9
ENSMUSG00000020334	Slc22a4	0.08194934278590713	0.015676937421440808	5.22738214632584	4.909368111946925e-7	0.0029775317598958097	6.260395770661001e-6	0.25744296945776113	0.12928521341426452	1.9912793014684886	0.047952889525308275	1	0.07320881973933376
ENSMUSG00000030062	Rpn1	-0.1161854402296045	0.013218686338587325	-8.789484616973004	4.9434220070058e-7	0.0029976911050483166	6.291628008916472e-6	0.6751691609093365	0.10786712762445562	6.25926707958674	6.922516020157174e-9	3.5664802535849756e-5	3.187554612500644e-8
ENSMUSG00000019428	Fkbp8	-0.11072639298191381	0.015324543233016054	-7.225428601575456	4.991595916180234e-7	0.003026404603980076	6.340675893526244e-6	0.273040954763234	0.11770346766638765	2.3197358597550117	0.02171879472932587	1	0.03597021628969651
ENSMUSG00000021693	Kif2a	-0.10927855386046093	0.01330579368237978	-8.212854976488417	5.006806562622171e-7	0.00303512613826156	6.347743195000749e-6	-0.08672229381108726	0.12129884763162625	-0.7149473841207058	0.4757422066226489	1	0.5431864861317074
ENSMUSG00000010122	Slc47a1	0.057488301086680724	0.010997483849701072	5.227404911191876	5.086284129485976e-7	0.00308279681088145	6.436105686926485e-6	1.3876199736425148	0.0911192751017844	15.228610764215142	2.9678065820557167e-34	1.9320420849182717e-30	2.7504460999896646e-32
ENSMUSG00000039515	Ptpa	0.07101450865593366	0.013643852313604809	5.204872276807216	5.130034798617375e-7	0.003108801087962129	6.479007480787394e-6	-0.14187824263294005	0.1340445559759243	-1.0584409161564365	0.29123452100594427	1	0.36027883967270413
ENSMUSG00000049401	Ogfr	0.11299740892318182	0.013743796747808302	8.22170256128106	5.193954431659454e-7	0.0031470169901424636	6.547168613087971e-6	-0.33031779577861986	0.11504036382841322	-2.8713208545767515	0.004828784718090031	1	0.00917510928242345
ENSMUSG00000041729	Coro2b	0.104421956825909	0.015013360051487396	6.955268938318959	5.274520448152628e-7	0.003195304487490862	6.636012342035237e-6	-0.3540004407000315	0.11072467843117086	-3.1971232223545067	0.001683148712842556	1	0.0034783663726457347
ENSMUSG00000046079	Lrrc8d	-0.11577168284223027	0.0159764555229381	-7.246393461679393	5.284862438595826e-7	0.0032010411790574914	6.636334894267277e-6	0.22995484927742302	0.11684936739994863	1.967959727931947	0.050848696800964224	1	0.07719991346339285
ENSMUSG00000062609	Kcnj15	-0.10006380364107327	0.01352285419545213	-7.399606783804985	5.300219443049161e-7	0.003209812894710572	6.642941701954948e-6	1.0048131738298687	0.10298682374329511	9.756715833226057	5.108866684422628e-18	3.120495770845341e-14	7.107049214270802e-17
ENSMUSG00000028293	Slc35a1	-0.11427430867267961	0.017434314797130437	-6.554562654305654	5.383937907217273e-7	0.0032599744028200587	6.735040195720467e-6	-0.23744999134827172	0.12061857228953518	-1.9686022379562917	0.05064364955618452	1	0.07694186425298871
ENSMUSG00000004880	Lbr	-0.10941460635931965	0.015020578858722565	-7.284313566636066	5.460891982833537e-7	0.0033060240064074235	6.818343310634663e-6	0.6789001246807863	0.1150570151037067	5.9005539477002715	2.249635148721208e-8	1.136470494732364e-4	9.674901489271599e-8
ENSMUSG00000022707	Gbe1	0.07066926485910788	0.013616523686139428	5.189963788705024	5.50165339383452e-7	0.003330150799288035	6.856227146104384e-6	-0.20676372440779744	0.1337760648159624	-1.5455958036457804	0.12391111228320577	1	0.17085815566292833
ENSMUSG00000030061	Uba3	0.08047904247022168	0.015141340712856064	5.315186019286212	5.549902309618055e-7	0.003358800877780847	6.888709738086977e-6	-0.22679085795230078	0.13067977444212434	-1.7354702280477403	0.08434970804389907	1	0.1215552078249794
ENSMUSG00000020859	Spag9	0.07106049799883178	0.013504044466067726	5.2621641003470465	5.552575289239854e-7	0.0033598633075190352	6.888709738086977e-6	0.8377853529369385	0.11472220765728286	7.302730395842009	8.526656489599819e-12	4.7834542906654985e-8	5.7781050156093517e-11
ENSMUSG00000062611	Rps3a2	-0.09199501883568711	0.012635960610895046	-7.280413548960154	5.559125943653776e-7	0.0033632711959105345	6.888709738086977e-6	0.9690714235805689	0.09804494930025914	9.883950478803579	6.718559564208354e-18	4.095633910341412e-14	9.11507668711154e-17
ENSMUSG00000033554	Dph5	0.07054883660511024	0.01360104019193554	5.187017728757301	5.57812400833302e-7	0.0033742072126406435	6.8899158784907905e-6	0.0421133829378037	0.1336239466269194	0.315163441889537	0.7529927700847081	1	0.7983713224552659
ENSMUSG00000054889	Dsp	-0.0680808497529508	0.013125518286747587	-5.186907538858091	5.581041281513056e-7	0.0033754137670590966	6.8899158784907905e-6	-0.5054631054584752	0.12895216299075002	-3.919772214249194	1.2469817615810177e-4	0.4936800794099249	3.1293440088493886e-4
ENSMUSG00000057322	Rpl38	0.10240351049528047	0.013388930289133882	7.648371324958543	5.629306009184432e-7	0.003404041343753826	6.9364856817291315e-6	0.8289915429545028	0.10669679706623492	7.7696010166067495	8.009577123085792e-13	4.57747332584353e-9	6.085798784053639e-12
ENSMUSG00000054408	Spcs3	-0.10501711936298906	0.013347175521882061	-7.868115556794655	5.652446527105645e-7	0.003417469170288073	6.951980962309373e-6	0.8887884285942267	0.10981932762631562	8.093187672925156	4.445698362078334e-13	2.551386289996756e-9	3.4741918316479145e-12
ENSMUSG00000029102	Hgfac	0.0699305474337797	0.013491636204463574	5.183251784586652	5.677381778125448e-7	0.0034319772848768336	6.9696216604599715e-6	-0.3411368060770213	0.13254910291081934	-2.5736636354796176	0.010845801752709853	1	0.019153348237474728
ENSMUSG00000019373	Cops3	0.08192724103842823	0.013722427067404792	5.970317104692941	5.832614322735115e-7	0.0035252320966611037	7.146853304208018e-6	-0.21320740069273517	0.12974500997058871	-1.6432801596074187	0.1020444743477712	1	0.14350344971325804
ENSMUSG00000048578	Mlec	-0.10412917102185458	0.013271872020141197	-7.8458540636791625	5.877391537730998e-7	0.0035517077062508424	7.188333888154269e-6	0.931005605952675	0.10535633484342545	8.836731149923564	2.589674246318715e-15	1.5317923166975197e-11	2.5585670481647364e-14
ENSMUSG00000096188	Cmtm4	-0.1051825730195902	0.014183823769447558	-7.415671170855709	5.903874402245258e-7	0.003567120913836585	7.207327192351354e-6	-0.505137612183452	0.11711687263960004	-4.313107076705298	2.74111955927257e-5	0.11589453496604427	7.665349213775397e-5
ENSMUSG00000055296	Tmem245	-0.10840419276405239	0.014684653760127477	-7.382141556404755	6.087933620306002e-7	0.0036777207000268557	7.41825985585435e-6	0.4059856723904715	0.12000439269805759	3.383090095809825	9.240513652880821e-4	1	0.001995489984770456
ENSMUSG00000048108	Tmem72	-0.06882966243862663	0.013320666512003958	-5.167133519677907	6.121948528111587e-7	0.0036976569109793984	7.445918912194869e-6	-0.39361972746103147	0.13086940453939694	-3.007729185032978	0.002998364047427952	1	0.005901655827722382
ENSMUSG00000020697	Lig3	-0.11872167904140962	0.01669193652737487	-7.112516803949344	6.179951318704533e-7	0.0037320726013656672	7.5025977263977535e-6	0.005697971288754092	0.12479788192190558	0.04565759611464957	0.9636449399343171	1	0.9711722629449849
ENSMUSG00000026687	Aldh9a1	0.06396321481374301	0.012394967819206536	5.160417981451251	6.316995594082778e-7	0.0038142019397071816	7.654849172940088e-6	0.7930982962792512	0.12177484184614687	6.5128255085830435	6.762215053485943e-10	3.6062892880240534e-6	3.56533453941807e-9
ENSMUSG00000031897	Psmb10	0.07050084787778683	0.013675923933565965	5.155106756973889	6.475518650963974e-7	0.003909270609586951	7.832520721202748e-6	-0.08647883592903843	0.13435964484952892	-0.6436369791382464	0.5206079475311898	1	0.5865753929375391
ENSMUSG00000003848	Nob1	0.07945195413281544	0.014035240254219332	5.66089020876791	6.562041363003706e-7	0.003960848166709037	7.922611407076034e-6	0.222544783022405	0.13016881283211246	1.7096628461184176	0.08902444526996803	1	0.12762110019093456
ENSMUSG00000024085	Man2a1	-0.11465440295299326	0.016852758415514653	-6.80330187653093	6.592816703475075e-7	0.003978764880547208	7.945189360598168e-6	-0.06881016854491656	0.12314423587157898	-0.5587770150823403	0.577102197687408	1	0.6404676101843726
ENSMUSG00000021629	Slc30a5	-0.1149163674794993	0.017555368969239402	-6.545938606067255	6.610083742903279e-7	0.003988524530467839	7.95143528853813e-6	0.44306408924247803	0.12225783586035367	3.6240138402953432	3.8583859353726946e-4	1	8.908133142018362e-4
ENSMUSG00000018761	Mpdu1	-0.07730775444062801	0.01480014727879638	-5.223444941752976	6.697141541113094e-7	0.004040385491753529	8.041458273818277e-6	0.5888825577076159	0.1257628593747811	4.682483848054929	5.529560315104165e-6	0.024722664168830722	1.724384212008787e-5
ENSMUSG00000034243	Golgb1	-0.11656003601003483	0.01822055377367891	-6.397173074860952	6.740906291593237e-7	0.004066114675089041	8.079264735643626e-6	0.1458209357749547	0.12368261377572698	1.1789929992858255	0.24005247660080734	1	0.3056987218953575
ENSMUSG00000020102	Slc16a7	-0.09181591886717659	0.010428890888943531	-8.803996498277463	6.837216802956905e-7	0.004123525453863309	8.179797556992079e-6	-1.033866322328777	0.10036945676597211	-10.30060693403379	8.912721840719582e-19	5.477758843306255e-15	1.3481772347571229e-17
ENSMUSG00000063796	Slc22a8	-0.08437494059390312	0.012959400429691577	-6.510713288910324	6.903329278376782e-7	0.004162707554861199	8.243903203578806e-6	-1.270830921577275	0.08912133342352709	-14.259559106212713	9.738369812306193e-31	6.296829920637184e-27	5.572041162171718e-29
ENSMUSG00000030730	Atp2a1	-0.1087696263620047	0.015347711889858558	-7.087025554205077	6.948114609324139e-7	0.004189018297961524	8.276203904653494e-6	0.6550495655178675	0.11513285783440372	5.689510169720874	6.251650869875854e-8	3.101443996545411e-4	2.539250785418711e-7
ENSMUSG00000032437	Stt3b	-0.11324286533116075	0.01397663469571789	-8.102298428523405	6.955533068804532e-7	0.004192795333875372	8.276203904653494e-6	0.7043911973405542	0.11124375568507876	6.331961672838729	3.945420132020924e-9	2.0484621325452638e-5	1.8690327191287028e-8
ENSMUSG00000018819	Lsp1	0.07907815394858785	0.014407682222342906	5.488610362738036	7.07958096783414e-7	0.004266863449313636	8.40859977768026e-6	0.07138307978961021	0.1302833417781894	0.5479064231491826	0.5844255515285068	1	0.6476120123033976
ENSMUSG00000032123	Dpagt1	-0.076631704836571	0.01439497538906701	-5.323503706353872	7.169018103794991e-7	0.004320050309346861	8.49948452666145e-6	0.658183163208802	0.12559153638756865	5.240664953549772	4.405158031657824e-7	0.0021003793494944506	1.5987832238449245e-6
ENSMUSG00000037434	Slc30a1	-0.08025545276825899	0.0139423638173532	-5.756229992246364	7.252294866110792e-7	0.004369507656831752	8.582751837951261e-6	0.083788485038413	0.13079637164205637	0.6406025181471593	0.5225828964039172	1	0.588599017175244
ENSMUSG00000019539	Rcn3	0.10676069232641547	0.013092279403080834	8.154477080690233	7.334922714347286e-7	0.004418557443122805	8.66495358355568e-6	0.15626402332196082	0.12165280522395978	1.2845081791108939	0.20098237224828772	1	0.2614598674167128
ENSMUSG00000030102	Itpr1	-0.11301994188382401	0.017070436602737514	-6.620799720242625	7.38384449630174e-7	0.004447289540122538	8.707114119294884e-6	0.27140214385172606	0.12126618562527874	2.238069437513094	0.026551480371949977	1	0.04312731198406093
ENSMUSG00000028173	Wls	-0.10867531687109346	0.014504270129046114	-7.4926429185472285	7.453426313106332e-7	0.004488453325752633	8.773442780007096e-6	0.7519140596135823	0.11246352039532592	6.685848504212682	5.15976603831231e-10	2.767182526346892e-6	2.787459813800903e-9
ENSMUSG00000001056	Nhp2	-0.1101592137641145	0.016983768776985923	-6.486146579750142	7.475977263707632e-7	0.004501285910478365	8.784273284856468e-6	-0.04806240111453934	0.11662020193717335	-0.4121275758074226	0.6807553136859669	1	0.7340244830668599
ENSMUSG00000026478	Lamc1	-0.107242101340741	0.014739586443923597	-7.275787672112851	7.489565601572101e-7	0.0045087184921464045	8.784552880275298e-6	-0.5271888180932557	0.11299614158426984	-4.665547077110512	6.588198998245959e-6	0.029304309144198026	2.032365185581735e-5
ENSMUSG00000025651	Uqcrc1	-0.11098355360385542	0.014987345918568453	-7.405150598836398	7.522244802394335e-7	0.00452763914656115	8.807183416326463e-6	0.07733323980529269	0.11884238041378088	0.6507210604166356	0.5163424882744568	1	0.5823947037220651
ENSMUSG00000001829	Clpb	-0.107541415030352	0.01383867315030928	-7.771078474235701	7.562177181632156e-7	0.004550918227906231	8.838210631463513e-6	-0.10025142134946466	0.1195853886257216	-0.8383250035941398	0.4033127752152643	1	0.4746553498330244
ENSMUSG00000026466	Tor1aip1	-0.10667556783203314	0.014313118705686656	-7.452992602489249	7.760763518793322e-7	0.004669651409257941	9.054224105258875e-6	-0.3542156768061622	0.12037874405395825	-2.9425101548441934	0.003839811854818935	1	0.007431165295502527
ENSMUSG00000022724	Riox2	-0.0696719343483947	0.013622907471233374	-5.114321923973755	7.828480453577873e-7	0.004709613840872449	9.117062191954407e-6	-0.16180500655884417	0.13383878256009324	-1.2089545605825738	0.2282231475470241	1	0.29261658434517124
ENSMUSG00000046312	AI464131	-0.10843005408400774	0.01424772672307547	-7.6103406663742055	7.847036741534701e-7	0.004719992600033122	9.122526812596878e-6	0.6445334921413133	0.11613661216258132	5.549787273276247	1.3893924917595146e-7	6.785792929753469e-4	5.387273185490634e-7
ENSMUSG00000017754	Pltp	0.0779231399247592	0.014297264931378126	5.450213051150905	7.909490535436292e-7	0.004756767608011386	9.178914942358167e-6	-0.3010010078942238	0.1289911719102306	-2.3335008391403775	0.020711343297491847	1	0.03442299542750602
ENSMUSG00000008140	Emc10	-0.11086205216812349	0.01568155727169564	-7.06958181814146	7.925097988872454e-7	0.004765361420709007	9.180835346264217e-6	0.7300851957743392	0.11055425850363998	6.603863167788342	5.238884527163974e-10	2.8064704412017408e-6	2.816328446792398e-9
ENSMUSG00000040997	Abhd4	0.07363607942737324	0.01382783238365012	5.325207695924905	7.99205586504034e-7	0.004804823986062252	9.242131386988653e-6	0.6509358811338366	0.12201167958077816	5.335029264168786	2.810158137243493e-7	0.0013514050482003957	1.0435011593150216e-6
ENSMUSG00000039145	Camk1d	0.07717229711527836	0.013675729138020065	5.6430115232928015	8.019054752970626e-7	0.004820253812010643	9.256426166173302e-6	-0.5176550984426412	0.1270364794256493	-4.0748539378849005	6.856931495530243e-5	0.2794199584428574	1.8004233535749798e-4
ENSMUSG00000006010	Odr4	-0.07655503156009037	0.01490166617130589	-5.137347104681621	8.032552189794765e-7	0.004827563866066653	9.256426166173302e-6	0.36920707550067394	0.12423876443170513	2.9717542442530447	0.0033623945788822363	1	0.006567098940054947
ENSMUSG00000004056	Akt2	0.07828627106153146	0.014971412305597856	5.229050503956797	8.132010947981379e-7	0.004886525378642011	9.354655950649907e-6	-0.29264059763689426	0.12919004217218819	-2.2651946908327076	0.024679214248204788	1	0.04038528469365519
ENSMUSG00000042699	Dhx9	0.07740436640229367	0.015031912671556373	5.149335822630174	8.211038891333419e-7	0.004933192165913119	9.429081309768569e-6	0.24156736282302652	0.12631974062721663	1.9123484708215024	0.057405498764075066	1	0.08621962608254141
ENSMUSG00000017721	Pigt	-0.10474247089223149	0.015768105510095293	-6.642679478848724	8.379249807601214e-7	0.005033415359426049	9.605481486762367e-6	0.753863409090732	0.11396650556867942	6.614780415781309	5.122937108396379e-10	2.7484557586546576e-6	2.772115639247383e-9
ENSMUSG00000031479	Vps36	0.12078285659796567	0.013277335583440684	9.096919772714372	8.558070024963365e-7	0.0051399768569929975	9.793408828566772e-6	-0.29222116017108113	0.11573536755033399	-2.5249080411309226	0.013077541598020352	1	0.022710536741877518
ENSMUSG00000020733	Slc9a3r1	0.11381824916293598	0.016118168733738395	7.061487631947463	8.57444466264182e-7	0.005148954019916413	9.795112131976246e-6	0.10076869754742235	0.11645900081817324	0.8652718711261479	0.3882528118066554	1	0.4590662177336554
ENSMUSG00000038991	Txndc5	0.10284233847118314	0.0107612362874231	9.55674011092734	8.610555563203775e-7	0.005169777560147547	9.808632652145832e-6	-1.1327256282875535	0.09582080140252885	-11.821291532818043	6.169769123454841e-23	3.8937412938123504e-19	1.5035955863826984e-21
ENSMUSG00000026924	Sec16a	-0.11270831058933649	0.017640869872863577	-6.389044950822539	8.616093727872782e-7	0.005172241064842031	9.808632652145832e-6	0.15599209241546003	0.12089575584900195	1.2903024702562196	0.19872108772884386	1	0.2588764120482662
ENSMUSG00000030082	Sec61a1	-0.10425010910713386	0.01332495131592732	-7.8236765475100585	8.698745959884792e-7	0.005220987325122852	9.877297794724793e-6	0.7024561785303998	0.11093391165789399	6.332204174830551	4.682850791610771e-9	2.4252484249752182e-5	2.197800157546282e-8
ENSMUSG00000043284	Tmem11	-0.1112887927444157	0.014687100755038509	-7.577315264637054	8.706432706596322e-7	0.005224730267228453	9.877297794724793e-6	0.3156981746895155	0.1164542592711311	2.710919949733232	0.007574249270844338	1	0.013805695346857546
ENSMUSG00000025497	Cdhr5	0.11028349283642078	0.014717482440152495	7.493366700784599	8.724547929951319e-7	0.005234728757970791	9.880813318258121e-6	-0.24431401030193997	0.12017595320813802	-2.0329691904236595	0.044267885211908144	1	0.06815224255834243
ENSMUSG00000024120	Lrpprc	-0.059570031310777545	0.011702592308348024	-5.090327830038424	8.748738693698628e-7	0.005248368342349807	9.891185670882642e-6	1.045927002975912	0.11497257179891913	9.097187151777227	1.4614067797644994e-16	8.781593339604877e-13	1.6811287781207004e-15
ENSMUSG00000035505	Cox18	-0.07837436781693481	0.014947143176832371	-5.243434607518362	8.799183725641395e-7	0.005277750398639708	9.93115418777365e-6	0.09757801955908996	0.12994244335605926	0.750932620927509	0.4536630212386029	1	0.5221449501049514
ENSMUSG00000007036	Abhd16a	-0.1088348904581961	0.015158707821308796	-7.1796944529272775	8.867687522523743e-7	0.005317952207257489	9.991332859281889e-6	-0.052594709201534535	0.12331627465644127	-0.4265025792261664	0.6704259519908222	1	0.7247453562750887
ENSMUSG00000000088	Cox5a	-0.11276105458354352	0.014814116538415223	-7.611729953057762	8.970677909938348e-7	0.005378818474799033	1.0090095837161424e-5	0.31634650049882473	0.11792729792906557	2.6825553205595387	0.008274502196673625	1	0.014941334921545679
ENSMUSG00000033184	Tmed7	-0.11014268213720556	0.01601097931768828	-6.87919707794041	9.130084394945535e-7	0.005473485594769848	1.023366463199732e-5	0.07145544566804288	0.12162930318913363	0.5874854479510552	0.5577227707174074	1	0.6218972769565396
ENSMUSG00000028070	Naxe	0.0676526463982104	0.013314956012533056	5.080951550612	9.136183596463724e-7	0.005476228447720356	1.023366463199732e-5	-0.4970735193263411	0.13081330151597	-3.7998698417198584	1.9632323276087696e-4	0.7593782643190721	4.7615439423758584e-4
ENSMUSG00000017561	Crlf3	0.07803052075709788	0.014584716300475805	5.350156914231664	9.144976905189095e-7	0.0054805846592798245	1.023366463199732e-5	0.024030602768040008	0.12988120928086383	0.18501985699928788	0.8534191918283203	1	0.8836346628214551
ENSMUSG00000042133	Ppig	-0.1092897109724345	0.01614025872869138	-6.771249012146133	9.185369680867574e-7	0.00550387351277585	1.0261414685926764e-5	-0.23164569704126683	0.12351085588505781	-1.8755087994600403	0.06263261844751378	1	0.09321932354323471
ENSMUSG00000038170	Pde4dip	-0.11111733205679998	0.017785417559851212	-6.247665070717044	9.289935489941689e-7	0.005565600352024066	1.03606399192909e-5	0.6865466220920053	0.11982774968161385	5.7294460082592025	4.463318339806364e-8	2.228981178899298e-4	1.85057559394618e-7
ENSMUSG00000021774	Ube2e1	0.06820735733693778	0.01310316020122326	5.20541276222588	9.35697789346248e-7	0.0056048297581840255	1.0417752037052981e-5	0.9960844156065817	0.1126477014640751	8.842474392824133	8.135315174355964e-16	4.8445801863289765e-12	8.551177930872562e-15
ENSMUSG00000022994	Adcy6	-0.09629471284561152	0.015046844888291664	-6.399661428060636	9.482130954014499e-7	0.005678848228359284	1.0539260418482331e-5	-0.9002943798826152	0.10896128029340352	-8.262516533013963	3.021862544087635e-14	1.764767725747179e-10	2.6833813144529876e-13
ENSMUSG00000007721	Ccdc124	0.10528947689606201	0.013678605172400419	7.697384021910844	9.535474862426808e-7	0.005709842347621173	1.0580678683772073e-5	0.745740260876147	0.10819177877962385	6.892762733803901	1.6799796381191332e-10	9.144129170282442e-7	9.713766273131719e-10
ENSMUSG00000018974	Sart3	0.07709154471430243	0.01443272959507511	5.34143899852516	9.587908080705692e-7	0.005740280567918498	1.0620948681993848e-5	-0.37560821111351067	0.12904549873485735	-2.9106649576770756	0.004055945217147243	1	0.007803543721879784
ENSMUSG00000000420	Galnt1	-0.10358642801902798	0.014011807028212963	-7.392795790753849	9.62755181276615e-7	0.005763052515121817	1.0646939651764919e-5	0.8794394149103494	0.11265653204602852	7.806377481520853	1.7142370837958144e-12	9.73515239887643e-9	1.2505188482679001e-11
ENSMUSG00000029221	Slc30a9	-0.11349889658403742	0.015933975780267163	-7.123074501255103	9.678233299280282e-7	0.005792422629619249	1.0685029380749038e-5	-0.15384898592145874	0.12114295006622011	-1.2699788624708297	0.20616284653536446	1	0.2674061758727968
ENSMUSG00000094483	Purb	-0.076567036054455	0.014663843380589453	-5.221484849995526	9.70361151923786e-7	0.005806641133111936	1.0695102813498346e-5	-0.3874468699992445	0.1274710758929217	-3.03948850580588	0.002719066700250865	1	0.005405274588414106
ENSMUSG00000024187	Fam234a	-0.11728290947829015	0.01575861270627459	-7.442464109267165	9.783427557794994e-7	0.005853424707828745	1.0765042362924927e-5	-0.3536181405333569	0.11875421219033114	-2.977731349576063	0.0033437112358935955	1	0.006536428975692174
ENSMUSG00000053291	Rab4b	0.1063166593183744	0.014337383945110443	7.415345764987493	9.888456471891664e-7	0.005915274661485594	1.0862444671961127e-5	-0.5756776151742533	0.11719641068417203	-4.912075479219446	2.1321613789011443e-6	0.00974397750157823	6.97644051375909e-6
ENSMUSG00000041248	Kcnj1	-0.10294564819215224	0.015628425016234602	-6.587077590045936	1.0001976082254026e-6	0.0059821818947961335	1.0968833770205249e-5	-0.8394532525354612	0.11134279999785786	-7.53935820323911	2.8440361810378933e-12	1.6085868639950326e-8	2.023108980673442e-11
ENSMUSG00000019762	Iyd	-0.07431050713387857	0.014520651721648476	-5.117573822329951	1.0071136593822293e-6	0.006022539683105731	1.1026302626847036e-5	0.755071697787573	0.12266288625448309	6.155665506036278	4.670713852077752e-9	2.4194297753762756e-5	2.1936686043305928e-8
ENSMUSG00000019432	Ddx39b	0.10916919329932545	0.013370622604692838	8.164854885741006	1.0092128698045208e-6	0.0060340837485612295	1.1030931367630808e-5	-0.3442396183243335	0.1181813703267688	-2.91280780864631	0.004172173042210086	1	0.008013105259119196
ENSMUSG00000024949	Sf1	0.10961690197461751	0.016013105706652202	6.845449220327085	1.0145015209956944e-6	0.006064690092512261	1.1070348272224991e-5	-0.4072929627660213	0.11908010360644078	-3.4203275814415037	7.949306801790507e-4	1	0.0017360251827342028
ENSMUSG00000001424	Snd1	-0.09929279860715916	0.014065996719635591	-7.059065957874867	1.0195117819024708e-6	0.006093621920431068	1.1094541417355745e-5	0.9064014329915955	0.10594890805015317	8.555080459748874	8.810298530756662e-15	5.17781244652569e-11	8.23462561539472e-14
ENSMUSG00000041757	Plekha6	-0.10665959585172594	0.016345608980222075	-6.525275135406845	1.0200908142097606e-6	0.00609606270571753	1.1094541417355745e-5	-0.35732778422854306	0.11386704849993352	-3.1381140455989924	0.0020045056334073996	1	0.004088545278307715
ENSMUSG00000029467	Atp2a2	-0.10651056119134253	0.01461980675512426	-7.28536040013049	1.027424152638781e-6	0.006138859312016717	1.1155859611160362e-5	0.7554329417805908	0.1123043980434726	6.726655010324401	3.768889662057014e-10	2.0287933050852904e-6	2.0700579279077755e-9
ENSMUSG00000074218	Cox7a1	-0.07920027846912356	0.0155585236998766	-5.090475163125645	1.0401653037877417e-6	0.006213947524827969	1.1275597527056574e-5	-0.08106515803177383	0.13035616464085298	-0.6218743720722235	0.5348046593350713	1	0.6002071735331348
ENSMUSG00000050721	Plekho2	0.07801029788036011	0.01445174997521005	5.397982805831531	1.0584441661452179e-6	0.006322087004385387	1.145487271913739e-5	-0.0965462969119963	0.13078125354220624	-0.7382273399057037	0.46132466031822694	1	0.5288355862184553
ENSMUSG00000006315	Tmem147	-0.10503276514276602	0.014729010567631463	-7.131012953007616	1.0722393874211616e-6	0.006403413621679177	1.1585115220412552e-5	0.530666777521904	0.11396095743866577	4.656566507064588	7.183461044665331e-6	0.03185146627204608	2.2015451175546286e-5
ENSMUSG00000075701	Selenos	-0.07685837711415461	0.014444775890020183	-5.320842476154693	1.0748115178531718e-6	0.006417699573101289	1.1593868504055527e-5	0.5110874866054009	0.1283982948524743	3.980484999373432	9.925318300555337e-5	0.39760825112024684	2.53625609388948e-4
ENSMUSG00000028134	Ptbp2	0.10690425466126086	0.015533084239799825	6.882358520102801	1.081780676331657e-6	0.006458230637699992	1.1649945745110154e-5	-0.2659358603238211	0.12082958573103064	-2.200916759872042	0.029060116354214766	1	0.046660704150984174
ENSMUSG00000002546	Golga2	-0.11346366033566545	0.018770986550200226	-6.044629568734902	1.099522228953841e-6	0.006563048184625477	1.1821660566203063e-5	0.019481493890319924	0.12276570008853646	0.15868841114635615	0.8740994381041916	1	0.9010769705037726
ENSMUSG00000039183	Nubp2	0.07199494289679485	0.012909580239438567	5.576861645497305	1.1052476100987593e-6	0.006596117737069395	1.1851153254921893e-5	0.7941017607949453	0.11954558208210395	6.642669239332959	3.4267263146628103e-10	1.845977465708856e-6	1.8884304146131737e-9
ENSMUSG00000031819	Emc8	-0.11096730994537551	0.014840618992332555	-7.477269647762474	1.1061727328035699e-6	0.006600532696638901	1.1851153254921893e-5	0.6018360986819761	0.11286370316702558	5.3324149553317985	3.7287197516148444e-7	0.001784938145098026	1.3667421775079402e-6
ENSMUSG00000036989	Trim3	-0.10566163417711412	0.015075089700635645	-7.009021921286403	1.107668579297411e-6	0.006608350744088353	1.1851153254921893e-5	-0.400824428774951	0.11971110435659295	-3.348264398104486	0.0010233216703472079	1	0.00219188040067859
ENSMUSG00000019188	H13	-0.10642109624290216	0.013982017511297165	-7.611283289905497	1.1209860894107434e-6	0.006686682023335084	1.197416959143294e-5	0.8009836285010986	0.11124448786775593	7.200209591088088	4.539145037457454e-11	2.505154146172769e-7	2.8123892981610213e-10
ENSMUSG00000031608	Galnt7	-0.08336068492950978	0.014143344875562435	-5.893986582590124	1.1451508723506957e-6	0.006829679802699549	1.2212467974177599e-5	-0.10552419109843368	0.1310761016706735	-0.8050604935105672	0.4218391573575553	1	0.49205843917970465
ENSMUSG00000009378	Slc16a12	-0.10878787752577328	0.014660632931583326	-7.42040797511628	1.1477247658291097e-6	0.006843882778638981	1.2220111584394082e-5	-0.262780961908343	0.12228154493570101	-2.1489830051339345	0.03321364601812192	1	0.052725160627078944
ENSMUSG00000031948	Kars	0.07458339914777547	0.014547190599247741	5.126996765384534	1.1693468312691554e-6	0.006971645808026705	1.2428811643852004e-5	-0.5389088262581535	0.12471439112976743	-4.321143866207147	2.5512284431710988e-5	0.10827413512818143	7.183176361174938e-5
ENSMUSG00000008668	Rps18	-0.09930517503762555	0.014152076068163722	-7.017004046566767	1.1711038327033802e-6	0.006980949946744849	1.2428811643852004e-5	0.4657433546815051	0.11688469837264072	3.9846392313617156	1.0953966006750967e-4	0.4364060057089585	2.775398395241485e-4
ENSMUSG00000022561	Gpaa1	-0.09897530031241396	0.013644015027280555	-7.254118389236422	1.1756810241877677e-6	0.007007058904159096	1.2457296520379247e-5	0.7886715750960648	0.11395809048370024	6.9207159557387525	1.4104941640898365e-10	7.684372205961429e-7	8.191572462234001e-10
ENSMUSG00000031403	Dkc1	-0.1144749532468136	0.016431208738902504	-6.9669222189225115	1.1907841652993052e-6	0.00709588284101856	1.259704149142995e-5	-0.004387281701664098	0.12056128457939284	-0.03639046910432474	0.9710131553826784	1	0.9766534029987807
ENSMUSG00000029560	Snx8	-0.0723197315700954	0.013479690216133289	-5.365088545101643	1.1988759179490427e-6	0.007142902719140396	1.265956223638151e-5	-0.6799651225455775	0.1210206227462986	-5.618588857958708	7.116823833893517e-8	3.517846021093566e-4	2.8588950443845753e-7
ENSMUSG00000069844	Sco1	0.11077131735072547	0.012263796037468327	9.03238418286615	1.2005420722647509e-6	0.007151629124481121	1.265956223638151e-5	-0.5196938060033979	0.1148924631829813	-4.523306330161252	1.3032231713513943e-5	0.056742336880639704	3.8493654575145794e-5
ENSMUSG00000052397	Ezr	0.09318515170246927	0.013201138931728614	7.058872130987202	1.2284896494988239e-6	0.007316884352414995	1.2933539029923618e-5	-1.0615456054663563	0.10891413003131502	-9.746628882415353	5.830186420293551e-17	3.5220156164993343e-13	7.104190119542883e-16
ENSMUSG00000052997	Uba2	0.10618605809186515	0.014516362915958009	7.314921699507359	1.2382714102295605e-06	0.007373906247917033	1.3015696292828286e-5	-0.242806535613493	0.12031493861380643	-2.018091339371139	0.04552232553736923	1	0.06979441994681125
ENSMUSG00000020483	Dynll2	-0.10852822456632612	0.016060700723498647	-6.757377927323986	1.240805714563578e-6	0.007387757224511544	1.3018640370438811e-5	-0.06887711534233132	0.12260175657372493	-0.5617955016893497	0.575004052451914	1	0.6387855250943093
ENSMUSG00000025544	Tm9sf2	-0.11053238407712962	0.01657584119119626	-6.668282037827162	1.2439195774733384e-6	0.007405053244698783	1.3018640370438811e-5	-0.2769635470365279	0.12255422460680356	-2.259926558428508	0.025227386061075763	1	0.041135575075959954
ENSMUSG00000042644	Itpr3	-0.10521868023426938	0.015028222540350248	-7.001405518966792	1.2444870506088165e-6	0.007407186925223676	1.3018640370438811e-5	-0.029485521776178095	0.12494390794932596	-0.2359900715458385	0.8138132708116689	1	0.8509282253203211
ENSMUSG00000032602	Slc25a20	-0.10948872961093196	0.01582146021254172	-6.920267038572073	1.2549396426580693e-6	0.0074681458134581704	1.3107147378873169e-5	0.13301459760363527	0.11901020304601664	1.1176738985329153	0.26552020606004134	1	0.332764370599565
ENSMUSG00000023959	Clic5	0.07484395373627582	0.014923648366328812	5.015124445383008	1.2670020710531245e-6	0.0075386623227660906	1.3212161057891536e-5	-0.5630093922215822	0.12232540730235447	-4.602554813735295	7.828209060930206e-6	0.03463199688555523	2.388021122898505e-5
ENSMUSG00000022560	Slc52a2	-0.10831530032508456	0.015566934996807284	-6.9580363987708305	1.2695243334097066e-6	0.007552400259454344	1.3217516002904856e-5	-0.06654019100279068	0.12276422333141869	-0.5420161444198315	0.5885852108934304	1	0.6515630362851232
ENSMUSG00000032570	Atp2c1	-0.11089201772119363	0.01758685412398109	-6.305392478918868	1.2721638384351488e-6	0.007566830511012265	1.322407275972082e-5	0.013996810764379811	0.12334685539201573	0.11347521361526196	0.9097904621903767	1	0.9290567853978489
ENSMUSG00000025825	Iscu	0.10825059727248365	0.017813232025805887	6.076976772977631	1.274398519439767e-6	0.007578847995108295	1.3226407346866982e-5	0.39297065090856304	0.11621600853814303	3.381381410802686	8.923472073389178e-4	1	0.0019308269070338964
ENSMUSG00000034566	Atp5h	-0.11136886527393026	0.016190150656842137	-6.87880351668405	1.293271070782698e-6	0.007689789786873923	1.340113959960654e-5	-0.1801960196213562	0.12078189038646615	-1.4919125627590568	0.13779958079916702	1	0.18753283178045893
ENSMUSG00000037280	Galnt6	-0.1040915407337913	0.01464530440503478	-7.10750270905988	1.2997819603179438e-6	0.007727203754090176	1.3447429715239104e-5	0.5645900348242268	0.12090372526266685	4.669748873309226	7.180107741638444e-6	0.0318437778341665	2.2015428210615545e-5
ENSMUSG00000074513	Arfip1	0.07486346871163475	0.014938673481684085	5.011386640415087	1.3246330142194494e-6	0.007873618636520406	1.3683022344684423e-5	-0.3653293249298903	0.12324854054725293	-2.9641675536906233	0.0034425738942035814	1	0.0067177153688788745
ENSMUSG00000026994	Galnt3	-0.10174356645268214	0.014421697966690489	-7.05489510927751	1.3299742293310395e-6	0.007904036844914367	1.3716662114417303e-5	0.7991843414652244	0.11591653947244895	6.894480676376425	1.8463076818129443e-10	1.00272970199261e-6	1.0564090909851456e-9
ENSMUSG00000021427	Ssr1	-0.09826190602729051	0.013616107407900077	-7.21659304554831	1.3521958963112392e-6	0.008034748015881383	1.3922635875432493e-5	0.8165522991326062	0.10871818693377994	7.510724030285446	8.138519734435875e-12	4.5689649789123003e-8	5.5378965721394065e-11
ENSMUSG00000031818	Cox4i1	-0.11048833499063078	0.014739479056810893	-7.4960814126993025	1.3541773495861392e-6	0.008045167633891253	1.3922635875432493e-5	0.11650220231908376	0.12042583313527425	0.9674186948594071	0.3353005719385629	1	0.4057149252217256
ENSMUSG00000020143	Dock2	0.06744468403918098	0.013515183321388052	4.990289989810822	1.3851403106126835e-6	0.00822773344503934	1.4218757010657498e-5	0.11673027712083668	0.13278044247387716	0.8791225194463549	0.3804752916605133	1	0.45141136298704965
ENSMUSG00000009376	Met	-0.11147364081532235	0.0171779123361407	-6.4893590463139335	1.3962705585588277e-6	0.008292450847280877	1.429505347910248e-5	0.2589300441339583	0.12539763572451998	2.0648718186584416	0.040538485480743694	1	0.06316439366878841
ENSMUSG00000010608	Rbm25	-0.10470727311728116	0.01609050167306058	-6.5073964283280645	1.3972843069562544e-6	0.008297074214706239	1.429505347910248e-5	-0.6120335009449743	0.11703315895759174	-5.22957345077519	5.213528091262637e-7	0.002472776373685869	1.866431710582598e-6
ENSMUSG00000061665	Cd2ap	0.07002030327909281	0.013676995878776065	5.11956747663792	1.3992490269734474e-6	0.008307341473141357	1.429505347910248e-5	-0.875877649600353	0.11863319236177561	-7.38307409725043	5.345737371418137e-12	3.010719287582695e-8	3.706528124755673e-11
ENSMUSG00000018411	Mapt	0.11102105378036886	0.018711581719781687	5.933280010369117	1.4012628410366412e-6	0.008317896224393502	1.429505347910248e-5	0.01247489161145836	0.1214967279262585	0.10267677018454274	0.9183371465458194	1	0.9356857268924577
ENSMUSG00000024527	Afg3l2	-0.10950122675303478	0.01700210958810195	-6.440449415151609	1.4089950575730544e-6	0.008362385666696079	1.435168340376269e-5	-0.3734971261550312	0.1213107518524148	-3.078846025201652	0.0024411483719163846	1	0.004903161259832055
ENSMUSG00000022698	Naa50	0.07784875814460022	0.012359041004831412	6.298931940930327	1.4858262788704043e-6	0.00881689313881698	1.511087622096949e-5	0.7392836807138717	0.1193475658142962	6.194375860704112	3.793950145309796e-9	1.971715890517501e-5	1.8037710950967095e-8
ENSMUSG00000035104	Eva1a	-0.10217793825864023	0.01459246538643893	-7.00210249281086	1.5019882418963906e-6	0.008911296239171286	1.5251670727898535e-5	-0.19392054641786788	0.12253470807532288	-1.5825764753824987	0.11590718729761935	1	0.16052816089630295
ENSMUSG00000001729	Akt1	0.07738802445218017	0.01248302827907135	6.1994591954843585	1.5103393452779857e-6	0.008959332996189012	1.531283958694784e-5	-0.7193646203009574	0.1225892223204324	-5.868090250386214	2.02984896176545e-8	1.0275095444456709e-4	8.792894120089969e-8
ENSMUSG00000073678	Pgap1	-0.10952463787915037	0.017527836998889854	-6.248611159841756	1.5139933952181848e-6	0.008979494827039055	1.5321115195968586e-5	0.08701600235996669	0.1217907257046476	0.714471499012064	0.4759174945793979	1	0.5432476601115417
ENSMUSG00000032044	Rpusd4	-0.06809532398913716	0.013699851370179126	-4.970515529632845	1.5158124608777432e-6	0.008988767893005017	1.5321115195968586e-5	0.168767218588404	0.13459471633483472	1.253891855372372	0.21146345123402555	1	0.273365325956756
ENSMUSG00000032370	Lactb	-0.07332290020875121	0.014745022200465203	-4.972722265988713	1.5612774352323233e-6	0.009256813913492446	1.57564501899213e-5	0.6075932350473958	0.12135511766376511	5.006737636980714	1.3051509087798279e-6	0.006040238405833043	4.397282631731319e-6
ENSMUSG00000014606	Slc25a11	-0.10904681795883708	0.015255116373298835	-7.148212789100888	1.5675785638086788e-6	0.009292605726257848	1.5795814624595875e-5	0.20854116480682808	0.12022319350020218	1.7346167468632196	0.08511720525696453	1	0.12258069831272196
ENSMUSG00000029622	Arpc1b	0.08871669820041006	0.013044069843565055	6.8013050577290555	1.5709161369073656e-6	0.009310819943449955	1.5805241866743832e-5	-0.7018431202073027	0.107996478838296	-6.498759290644819	1.5940386680114318e-9	8.410148012428315e-6	8.037375046371818e-9
ENSMUSG00000032434	Cmtm6	-0.08187590178719854	0.011793718371886874	-6.94233143487377	1.6182285912937625e-6	0.009589622632006837	1.6256403252996884e-5	1.258932219037474	0.09606603822209751	13.10486247103182	2.0581731963135658e-25	1.3122912299695296e-21	6.60623396670403e-24
ENSMUSG00000028911	Srsf4	-0.07575444108733342	0.014351722418453153	-5.278421563528145	1.6244357141821797e-6	0.009624781606529414	1.629388262091272e-5	0.34426499121177573	0.12961663161779727	2.6560248242441267	0.008607037609426122	1	0.015495022563618024
ENSMUSG00000045302	Preb	-0.0949830149677504	0.013379940532287712	-7.098911593705726	1.638246852785543e-6	0.009704974355901556	1.6407403791976978e-5	0.8680871012710177	0.11291681719293001	7.687845998951613	3.1735535577146935e-12	1.793057760108802e-8	2.2429626648509866e-11
ENSMUSG00000005514	Por	-0.07710223583779258	0.014398745497746286	-5.354788432774281	1.6678061537855959e-6	0.009878415848872084	1.6668839758940557e-5	0.1309926851554136	0.13187337408127592	0.9933217077973637	0.32186782777171863	1	0.39227455209074064
ENSMUSG00000055065	Ddx17	-0.11133727726370979	0.017932806186894426	-6.208580860316039	1.670294453641342e-6	0.009891483754464027	1.6668839758940557e-5	0.023497984495943293	0.12318477928449117	0.19075396028981367	0.8489511637192804	1	0.8801163789621657
ENSMUSG00000031167	Rbm3	0.10429293145686887	0.01349599425330875	7.727695307168633	1.6728706935372484e-6	0.009905067376434047	1.6668839758940557e-5	0.34365221298225906	0.11978694223630292	2.8688620526295647	0.00476445962233854	1	0.009071222313364465
ENSMUSG00000014959	Gorasp2	-0.10118877144738474	0.013828963741574458	-7.317162250066336	1.674483750860138e-6	0.009912943805092016	1.6668839758940557e-5	-0.17445787360879336	0.125084959067516	-1.3947150393567926	0.16571711580297235	1	0.22064318534673372
ENSMUSG00000030283	St8sia1	-0.07899000263131511	0.01574040371116093	-5.018295850652565	1.6793718723671443e-6	0.009940202112541128	1.6686114703535453e-5	0.2135938319727268	0.13351745070145038	1.5997446839389555	0.1113957307819443	1	0.15519456035257115
ENSMUSG00000014856	Tmem208	-0.07487304557402755	0.01493686289461717	-5.012635256966154	1.6812908888212775e-6	0.00994987948004432	1.6686114703535453e-5	0.31456521800507364	0.1267318534794466	2.482132229337985	0.013967768763235385	1	0.024126932946311068
ENSMUSG00000027879	Sec22b	-0.1056380961594719	0.01676321588353489	-6.301779854975882	1.7224074585373056e-6	0.010191484932165236	1.7068435357191974e-5	0.37713473469388054	0.12224236392836808	3.0851394113654003	0.002380507275615306	1	0.004790133906284011
ENSMUSG00000020745	Pafah1b1	0.07635469533085064	0.013979906728043782	5.461745690883805	1.739511012432539e-6	0.010290947149550901	1.7212003701964073e-5	-0.29281074770985094	0.13102119173635238	-2.2348350204221914	0.02663810729535965	1	0.04324666814790686
ENSMUSG00000028017	Egf	-0.09536925430598403	0.015399585594062395	-6.192975370892803	1.7441006183129567e-6	0.01031635515732114	1.723150460735624e-5	-1.0041274010196293	0.10624122804030448	-9.451391136392887	1.862832120668202e-17	1.1298076811852645e-13	2.3754719678288313e-16
ENSMUSG00000035596	Mboat7	-0.10321485387522411	0.015547954818152429	-6.6384842947137654	1.7742741546026628e-6	0.010493057350320148	1.7503334238808876e-5	0.6618307473088295	0.11842917150782359	5.588409839252384	1.0286408235427479e-7	5.052683725241978e-4	4.0553964163638595e-7
ENSMUSG00000046909	Tefm	-0.09751477625597217	0.013930666315752118	-7.000008043097495	1.788103663441944e-6	0.010573056961932215	1.759751255890167e-5	0.8104553286000589	0.11229949856833911	7.216909593829234	2.2324133861916093e-11	1.2396591533522006e-7	1.428918295830816e-10
ENSMUSG00000096210	H1f0	-0.09166106871841682	0.014091829974084018	-6.5045539782263	1.7891695899552004e-6	0.010577570615815145	1.759751255890167e-5	-0.3215706463106114	0.10519150781767532	-3.0570019670026816	0.0026395307521740402	1	0.005261469963436893
ENSMUSG00000051980	Casr	-0.08689580312115373	0.011587780896499776	-7.498916651712117	1.7927814785902282e-6	0.010597131319946839	1.7606719595707017e-5	-1.020066841814467	0.10482304304673908	-9.731322542884334	1.072764502113932e-17	6.518117114844251e-14	1.3977802819623112e-16
ENSMUSG00000026819	Slc25a25	-0.0759978264846083	0.014261863597800224	-5.3287444493811	1.854117932283226e-6	0.010957836979793866	1.817008696528221e-5	0.31207103585625134	0.1307939919820412	2.385973783100837	0.018056570063324878	1	0.030371224697514746
ENSMUSG00000027010	Slc25a12	-0.104900708338354	0.014758548662512078	-7.107792963735682	1.85636935014863e-6	0.010969286490028256	1.817008696528221e-5	0.21905773843659837	0.12187211799061076	1.7974393327067226	0.07477655785576481	1	0.109339944597985
ENSMUSG00000039323	Igfbp2	0.067377194693284	0.013679098157056875	4.925558243656944	1.858429867421721e-6	0.010979603656727527	1.817008696528221e-5	0.16276838561289847	0.1343908301312681	1.2111569327603096	0.22738014453590227	1	0.2915925455167096
ENSMUSG00000025204	Ndufb8	-0.10770808063957377	0.015533728651266227	-6.933820144385874	1.895083191856297e-6	0.011194256414295146	1.8496543190423265e-5	0.09469896355281703	0.12208028755001327	0.7757105217664335	0.4392647732043309	1	0.5082402334595564
ENSMUSG00000022781	Pak2	0.07388780714646062	0.014596192956299752	5.062128691205776	1.8990369116902134e-6	0.0112157120004424	1.8496543190423265e-5	0.3482464787257917	0.12695016873160886	2.7431746031156163	0.0066934022525935565	1	0.012326500649892417
ENSMUSG00000041881	Ndufa7	-0.1090092942804765	0.015841754225479603	-6.881137829114142	1.900252765459898e-6	0.011220992580040697	1.8496543190423265e-5	0.3672740940346611	0.1202372211534394	3.0545790272878004	0.0026889950356130438	1	0.005353581644276498
ENSMUSG00000034675	Dbn1	0.08965389031329588	0.013853796545924321	6.4714311355807626	1.9120982310448473e-6	0.01128902795608878	1.858435208312422e-5	-0.33435085777590795	0.11123323575433051	-3.005853920444736	0.0031631519133590966	1	0.006198195232252191
ENSMUSG00000042371	Slc5a10	0.07362503458037647	0.014724387787272529	5.000210239234293	1.9212358427410163e-6	0.01134105517970022	1.8645622190613404e-5	-0.7241162098655497	0.12527117338228866	-5.78038977615203	3.199960132089332e-8	1.6060599902956358e-4	1.347998570367977e-7
ENSMUSG00000022443	Myh9	-0.0713025354031161	0.014498969777560208	-4.91776564107815	1.9251782772054204e-6	0.011362402192066391	1.865636681003191e-5	0.05221904872825229	0.11723191922016686	0.44543371016713074	0.6565384396929568	1	0.71205256851486
ENSMUSG00000018379	Srsf1	-0.10406231883475578	0.015120573904328059	-6.8821672704479395	1.942349476933865e-6	0.011461804263386739	1.8795087585624753e-5	-0.1854717463153512	0.12512965778508547	-1.4822365025077058	0.14016245922552087	1	0.19035479498533073
ENSMUSG00000054428	Atpif1	-0.0497228965060477	0.010117836378481621	-4.914380372052388	1.9546600252119237e-6	0.01153249414875035	1.8886436073266457e-5	-1.297730990936971	0.09940307573091091	-13.055239804148451	4.925635241342533e-28	3.162257824941906e-24	2.0130857073312962e-26
ENSMUSG00000001576	Ergic1	-0.08152929020027806	0.011551921479246266	-7.057638882566024	1.960996199782896e-6	0.011567916582519303	1.8919875358609172e-5	1.3273632253667078	0.09569557626523512	13.870685324969621	9.951226155390074e-27	6.364804248987491e-23	3.539409086619821e-25
ENSMUSG00000028405	Aco1	0.06637397798747814	0.013510081999027725	4.912921919515726	1.9675662751157536e-6	0.011604705890632715	1.8955470117513407e-5	0.3365242012145211	0.132730324334589	2.5353980177597153	0.012059667177971528	1	0.021065200432984512
ENSMUSG00000096336	Igkv1-135	-0.10423009400666687	0.01615573920814441	-6.451583097734242	1.9742568110837546e-6	0.011642192414960902	1.8992119615396354e-5	-0.003673794934384135	0.12157227346166348	-0.030219019763109284	0.9759320022678808	1	0.9804019198355199
ENSMUSG00000054455	Vapb	-0.10627938099407278	0.015645631320895838	-6.792910993123634	2.0261082177375277e-6	0.011945934051780464	1.946247017914297e-5	0.6121338009002834	0.11914595265757831	5.137680191785755	8.41254329879104e-7	0.003932863992184811	2.9042253360989005e-6
ENSMUSG00000052337	Immt	-0.10470717156097867	0.014799591003022557	-7.075004406513266	2.0376318804556493e-6	0.012011839935286053	1.9544632322737862e-5	0.3866586183264117	0.11741237505405437	3.29316750596691	0.001277354472006522	1	0.0026930446734389347
ENSMUSG00000025724	Sec11a	-0.10410391075405866	0.016060228706862658	-6.48209391374198	2.0774468484058528e-6	0.012244471724504095	1.9897525855182694e-5	0.6576154908987906	0.11874759292677169	5.537926914479215	1.2696859094738314e-7	6.215490677502516e-4	4.9552391959299e-7
ENSMUSG00000035227	Spcs2	-0.10531736846915822	0.016022855725535474	-6.57294618844473	2.0870297810479425e-6	0.012298866499715524	1.994262410586685e-5	0.6184355852939454	0.12113180099867941	5.105476680732978	9.821991587971035e-7	0.004577048079994503	3.364326113943228e-6
ENSMUSG00000042102	Dmgdh	0.06721061097512301	0.01371723708915049	4.899719275704768	2.088217022635602e-6	0.012303774697368966	1.994262410586685e-5	-0.1956009064109484	0.13476552754812499	-1.4514164710341004	0.14835755973265757	1	0.2001625472710451
ENSMUSG00000000355	Mcts1	0.07551553110359506	0.014020309718196464	5.386152846936478	2.1038206803999183e-6	0.012393607628235919	2.0062521850770233e-5	0.33361245360832387	0.13041598239480917	2.5580641841762666	0.011336716265935019	1	0.019913399100334336
ENSMUSG00000055912	Tmem150a	-0.10950883163116115	0.018359873821228737	-5.964574304674184	2.1076001756716974e-6	0.012413765034706297	2.0069477794384617e-5	-0.0837230887512848	0.12233397704082744	-0.6843813205168934	0.49463046561225466	1	0.5609563019180689
ENSMUSG00000032496	Ltf	0.10197348399328264	0.014529208125077634	7.0185162959621215	2.1184189302637336e-6	0.012475369080323127	2.0143347631698506e-5	0.35775144506461537	0.12194093887962992	2.9338091731256735	0.003939292334391491	1	0.007599103946143656
ENSMUSG00000029048	Rer1	-0.10260958591839901	0.01612716392560934	-6.362531341016432	2.1254480870452613e-6	0.012514638336522499	2.0181022240631773e-5	0.5268306048846899	0.1212615272224532	4.344581640623937	2.4559930300928553e-5	0.10437970377894636	6.932833178039891e-5
ENSMUSG00000019822	Smpd2	-0.09723180661693208	0.01251904950147632	-7.766708375541285	2.1518521799605205e-6	0.012667953783427584	2.0402287239395137e-5	0.6723678057930533	0.1175034051886593	5.72211336951064	9.517703374176604e-8	4.679854749082636e-4	3.763611069836662e-7
ENSMUSG00000015092	Edf1	0.09857962596050487	0.013618405730157664	7.238705316452897	2.1712814530271455e-6	0.012780162632517779	2.0556880519307363e-05	0.5502746118268839	0.11806677889463121	4.660706567746519	7.316589766215724e-6	0.03242712584386809	2.2402587557794075e-5
ENSMUSG00000020609	Apob	0.07143275382050313	0.014390632244681994	4.963837071640882	2.2088735862772994e-6	0.012999221055241907	2.088274166336872e-5	0.502697892092566	0.12272004074354982	4.096298282226473	6.314799470454517e-5	0.257959558368067	1.6647187706566796e-4
ENSMUSG00000038298	Pdzk1	0.10145914509393998	0.01575535031885073	6.439662910735006	2.2463889471095515e-6	0.0132177525647926	2.1206943001407246e-5	0.13001398407420767	0.12344841363086521	1.0531847291531407	0.29409291115119907	1	0.3634732072454714
ENSMUSG00000027304	Rtf1	0.0991658329919519	0.01387057296165876	7.149368181550073	2.266578127626205e-6	0.013334279124824964	2.136688263578858e-5	-0.4636732011779547	0.12291475799070518	-3.7723151292623274	2.44761401008224e-4	0.9359379497475808	5.839485201719049e-4
ENSMUSG00000005575	Ube2m	0.06713759789797241	0.01377222206185327	4.874855894455276	2.335162716253095e-6	0.013735427097000706	2.198193229319795e-5	-0.040380758130471275	0.13530572954400433	-0.2984408588354611	0.7657016461590667	1	0.8097584107564543
ENSMUSG00000023064	Sncg	0.0638739602398008	0.012055395713002046	5.298371099582499	2.383329473461444e-6	0.01401636063342675	2.240329705053757e-5	-1.0848509513942637	0.1116508347924653	-9.716460726968736	2.960039865658281e-18	1.8124324097425654e-14	4.252633693456657e-17
ENSMUSG00000025869	Nop16	0.06390430957890524	0.013123715568526323	4.869376301644514	2.3932705508928156e-6	0.014072430839249755	2.246465082007807e-5	0.5514191756024206	0.12893445236015252	4.276740355340726	3.036025406377753e-5	0.12775594910037585	8.41847752800911e-5
ENSMUSG00000003234	Abcf3	0.07492250364636323	0.014882786522099078	5.03417176179425	2.4022062536471507e-6	0.0141225705651916	2.2516406195154202e-5	0.2265771978220896	0.1306795324591621	1.7338384485948164	0.08463781713381675	1	0.12194369098763176
ENSMUSG00000079426	Arpc4	0.09973935156540627	0.016692440938800093	5.9751208305054435	2.438065068487972e-6	0.014330946472572301	2.2820011594097947e-5	-0.36069963922096443	0.1141182819607948	-3.160752449330444	0.0018628860314069148	1	0.003819982295733856
ENSMUSG00000031378	Abcd1	-0.10207132386569719	0.014567615244126048	-7.006728428447091	2.441879209377248e-6	0.014350924113510086	2.282324601946348e-5	0.39787857890785766	0.12259059559022292	3.2455881056147673	0.0014698576803122703	1	0.003070369376652298
ENSMUSG00000018428	Akap1	-0.0726692597121853	0.014173611680617539	-5.127081321944268	2.462769222037067e-6	0.014471231948689805	2.297912123554299e-5	0.5255186885526847	0.12677444407389346	4.145304618700389	5.192863318950641e-5	0.21358246830843985	1.3844830080508597e-4
ENSMUSG00000028435	Aqp3	-0.1067629728931027	0.013388663927414337	-7.974131957595646	2.4655409714731535e-6	0.014485053207404777	2.297912123554299e-5	0.09708932974191278	0.12271050134593456	0.7912063652010284	0.4301182257313737	1	0.5002081875773134
ENSMUSG00000037111	Setd7	0.06331432461199055	0.013030352025997073	4.858988036982507	2.507296711367372e-6	0.014727860882571943	2.3335236719656727e-5	-0.6619302674416878	0.12801719861722	-5.170635466105642	6.022571769034069e-7	0.002846267418045501	2.134203117802308e-6
ENSMUSG00000020719	Ddx5	-0.10421807016597669	0.016149610124776177	-6.45328706766047	2.5132947589973648e-6	0.014760580119591523	2.3358021912715622e-5	0.36982165403916534	0.12363741227388099	2.9911791846624727	0.0032169073676905674	1	0.006296029291910747
ENSMUSG00000058793	Cds2	-0.10459800843608336	0.015549557230800915	-6.726751564918726	2.5169249914337106e-6	0.014779383549698748	2.335876790357379e-5	0.2653387925443069	0.12434425292452335	2.133904754772759	0.03459393443327585	1	0.05472139382678551
ENSMUSG00000062949	Atp11c	-0.10876066802471479	0.016380926367939457	-6.639469928732468	2.532587547175782e-6	0.014868821489469016	2.3471022620305134e-5	-0.39064117459858366	0.12202288474398956	-3.2013763272206637	0.0016238733061863728	1	0.003366441825679374
ENSMUSG00000040459	Arglu1	-0.1017237309473701	0.016445135934558715	-6.185642450884352	2.5509026961574516e-6	0.014973798826444241	2.3607510183848143e-5	-0.3718610137788516	0.12321695232283912	-3.017937116351843	0.0029194561836014443	1	0.005763582864715723
ENSMUSG00000037742	Eef1a1	0.07818310413585107	0.015971329358624893	4.895215819566726	2.5756060357220777e-6	0.015116231823652874	2.380265128518437e-5	-0.12038302794773174	0.13411845978008158	-0.8975873130747828	0.37059669275344287	1	0.44160199897096236
ENSMUSG00000030946	Lhpp	0.06691800971972195	0.011684622351077709	5.727015192198308	2.666445694921299e-6	0.015646703337798183	2.460759140614607e-5	-1.019060518476286	0.1142217094692724	-8.921776107285723	4.679477788556779e-16	2.7931802919895415e-12	5.031203243252224e-15
ENSMUSG00000030613	Ccdc90b	-0.10683789869166632	0.015296504365901579	-6.984464955916696	2.6710025479430547e-6	0.0156707719487819	2.461512152025952e-5	0.13378719977723952	0.121942430164435	1.0971341115379796	0.27466314044067963	1	0.3425633270737822
ENSMUSG00000025780	Itih5	-0.10437519886179179	0.017307799251146484	-6.03052978297503	2.6798064419064524e-6	0.01571974458822325	2.463957605363109e-5	0.005486929592731837	0.123197159887523	0.04453779289832099	0.9645293524207224	1	0.9717904822851712
ENSMUSG00000014158	Trpv4	-0.07308893025168305	0.014421992403058333	-5.067880235201329	2.681145357811529e-6	0.015724917523564617	2.463957605363109e-5	0.49368636804093263	0.12869388560024203	3.836129166030901	1.7204386022536572e-4	0.6702828794380249	4.2161959042193907e-4
ENSMUSG00000040118	Cacna2d1	0.0768223173710674	0.013633840754247412	5.634679086825522	2.694628861519136e-6	0.015801303643948213	2.4728951058292766e-5	0.19015382611302273	0.13113191710837124	1.4500956769805635	0.14874416542730187	1	0.20056078043271441
ENSMUSG00000045975	C2cd2	-0.10251904235061486	0.01698015138097665	-6.037581176424015	2.7771117781094263e-6	0.016282206355055565	2.5450411559832904e-5	0.2633081437305122	0.12366147598024287	2.1292657365061727	0.03459589640112883	1	0.05472139382678551
ENSMUSG00000093752	Gm20716	-0.10268932411040256	0.017066058809631718	-6.017166895759606	2.7988086148542386e-6	0.016406616100275547	2.5613575362643797e-5	0.6844269614189519	0.11873354959030542	5.7643940047323845	3.848248675829244e-8	1.9256636373849535e-4	1.605673829229957e-7
ENSMUSG00000028763	Hspg2	-0.103243431421039	0.016787666707503923	-6.149957181059009	2.8054704649726336e-6	0.016442862395204604	2.563888286044435e-5	-0.2461705540506272	0.12006046890436449	-2.050388077750364	0.04195903090315109	1	0.06508496542733007
ENSMUSG00000024038	Ndufv3	-0.07398905838512815	0.015251219772825154	-4.851353497440443	2.839314966140081e-6	0.016638385701580875	2.5912194836618212e-5	0.5884404253739078	0.12674526235647066	4.642701545079618	6.580557382363965e-6	0.02927689979413728	2.030960017633907e-5
ENSMUSG00000033059	Pygb	0.05191037261016374	0.010746846079446256	4.830289019347199	2.8503062293105105e-6	0.01669994419753028	2.594318318423854e-5	-1.2494332538843549	0.10558280592238177	-11.833681090109163	2.0291782421494557e-24	1.2885281837649044e-20	5.780083477637844e-23
ENSMUSG00000041720	Pi4ka	-0.10132927782166057	0.015209896413019106	-6.662062322457796	2.850595963860861e-6	0.01669994419753028	2.594318318423854e-5	0.17132805823457867	0.12650648845075052	1.3543025368321513	0.17747375040034127	1	0.23435225318768724
ENSMUSG00000015854	Cd5l	0.07315211161492466	0.013794210794674295	5.303102345164061	2.861008515826223e-6	0.016756926877194187	2.6001983472564292e-5	-0.5640622119369774	0.12806220459630727	-4.404595514461746	1.8020646172611715e-5	0.07741857151630556	5.1893151779337016e-5
ENSMUSG00000025085	Ablim1	-0.0947606686185644	0.016061136206060426	-5.899997821001475	2.8728321649106096e-6	0.01682330515771653	2.607342847601629e-5	-0.6918282597657325	0.11069235737446344	-6.250009270516595	3.1586629343912342e-9	1.645979255111272e-5	1.5170804458608993e-8
ENSMUSG00000029290	Zfp326	0.0738335407615918	0.01521816912470253	4.851670405064908	2.882163864424993e-6	0.016875069426208335	2.612209122302542e-5	0.099056630494436193	0.12682254031414159	0.781064866301142	0.43578203843551255	1	0.5054549291213948
ENSMUSG00000026895	Ndufa8	-0.1046414347874915	0.015341731549484424	-6.820705632214513	2.9166014589241893e-6	0.017073784940542205	2.6386378557875372e-5	0.2765346562683454	0.12303028747767825	2.2476957661219634	0.026301502234528987	1	0.04274237705685373
ENSMUSG00000025240	Sacm1l	-0.10557943670368426	0.0173441969536695	-6.0873061454336685	2.919344010658552e-6	0.017086920494384504	2.6386378557875372e-5	0.13639429140744866	0.12563112398073342	1.0856727782549	0.2792211550992107	1	0.34736679744704957
ENSMUSG00000026179	Pnkd	-0.050692122976210646	0.010510812948324547	-4.822854637927042	2.9463125393881447e-6	0.017241820980499423	2.6593602893242787e-5	1.2894600565429348	0.10326388927555849	12.487037488022803	2.3836118894654634e-26	1.5238430809352707e-22	8.342641613129122e-25
ENSMUSG00000021451	Sema4d	-0.10321973972112004	0.01682135689561793	-6.136231480113797	2.9654815280102022e-6	0.017351032420387692	2.6729956786722097e-5	-0.2991213633207691	0.12553282150574838	-2.3828139902604817	0.018236203971318816	1	0.030657695996749567
ENSMUSG00000028779	Pef1	-0.0995997502501504	0.015457743396067768	-6.443356426494127	2.980736842631728e-6	0.017437310529395608	2.6830709199065345e-5	-0.19040375087276923	0.11466372361369573	-1.6605404470749885	0.09888249807633177	1	0.13968373493822736
ENSMUSG00000020839	Tmigd1	0.050319622329199246	0.010458514840637041	4.811354489232069	3.101012547371086e-6	0.018137822389573482	2.787522207882752e-5	1.2471244058782187	0.10275008448918137	12.137453823792518	2.577657162570656e-25	1.6424831439900221e-21	8.11530341134685e-24
ENSMUSG00000069662	Marcks	0.07405392042368368	0.013785354880430445	5.3719270244402555	3.107538393244505e-6	0.018172884523693866	2.789577438956186e-5	-0.08512953690579232	0.13084713809459841	-0.6506029718758259	0.5161183899233364	1	0.5823146443236545
ENSMUSG00000020346	Mgat1	-0.10352260789423989	0.016097403523384013	-6.4310127868669635	3.115155592952088e-6	0.018214314751990857	2.7926054225646783e-5	0.26627504794944085	0.1279455569672054	2.0811590043544195	0.03919289574932024	1	0.061285469113718447
ENSMUSG00000027111	Itga6	-0.07407483594221553	0.010661454130561125	-6.947911141865681	3.1479110434021216e-6	0.018402687959728804	2.8181298864742802e-5	-1.2823635529657558	0.09131686294754629	-14.043009270942255	7.9329417414714895e-28	5.0897754213281075e-24	3.163561009629236e-26
ENSMUSG00000022620	Arsa	0.05943933035421333	0.012363442754852662	4.80766818213991	3.1522423436813927e-6	0.01842485649881774	2.8181731822586363e-5	-0.89573780710833	0.12146512262929389	-7.374444513114119	5.362411285788921e-12	3.019573795027741e-8	3.7141753958411684e-11
ENSMUSG00000018442	Derl2	-0.07153597783712559	0.014098325354116134	-5.0740762495057625	3.1843044277638876e-6	0.01860907507585216	2.8429746451406218e-5	0.6440909142442477	0.12594067638770595	5.114240551332488	7.938964667980357e-7	0.0037209927398823934	2.7580986016531545e-6
ENSMUSG00000030492	Slc7a9	0.08625429368595192	0.013179680266942748	6.544490605154875	3.2198477033995713e-6	0.018813570130963696	2.8708127220012435e-5	-1.0967705094206246	0.1063300501675188	-10.314774682159051	1.054836526843554e-18	6.480915620926796e-15	1.5882893241717587e-17
ENSMUSG00000020964	Sel1l	-0.10178985623652642	0.01570786024525402	-6.480186011795035	3.300464602111001e-6	0.019281314205532467	2.9387086714330698e-5	0.5224553058545405	0.1210480367015482	4.316098964435813	2.8038979608579776e-5	0.11846468884624956	7.830920450953096e-5
ENSMUSG00000027488	Snta1	-0.08811329800094532	0.01402511606129927	-6.28253610279091	3.3434176470877753e-6	0.019528902476639694	2.9729308267348052e-5	-1.0047784337039318	0.10813011470799301	-9.292308959602522	6.007694486436548e-17	3.628647469807675e-13	7.306955586091033e-16
ENSMUSG00000025234	Arih1	0.09533138603097861	0.015025384617791281	6.344688569109803	3.350281740974373e-6	0.01956564536729034	2.975014015602075e-5	-0.32455016358693134	0.1261792114015136	-2.5721365665710456	0.011238285962463802	1	0.019772171559628827
ENSMUSG00000002379	Ndufa11	-0.10650275772751727	0.016831533223809408	-6.327573151616485	3.3831272414583044e-6	0.01975407996287504	3.0001317046894397e-5	0.2440079496491493	0.12496650085776743	1.9525868770773276	0.05268225756081458	1	0.0797444800437451
ENSMUSG00000037703	Lzts3	-0.10144639045730669	0.016350765173474658	-6.204381836629887	3.392766646435654e-6	0.01980697168189135	3.004630489037228e-5	-0.3103206943358822	0.12307526185327612	-2.521389673790256	0.012626750987439983	1	0.021968276440337147
ENSMUSG00000051124	Gimap9	0.07479808113162757	0.013909037778328673	5.377660361823779	3.4137748217737988e-6	0.019926203634693662	3.019171818181666e-5	0.11221465826300416	0.13234219206005304	0.8479129483670967	0.39759369796224187	1	0.46918338102430984
ENSMUSG00000014294	Ndufa2	-0.1017035600034841	0.015682393878599918	-6.485206326966959	3.481155013768305e-6	0.02031602066035183	3.073172512679004e-5	0.43381198029870616	0.12065378925082819	3.595510617547624	4.4537032764408146e-4	1	0.0010175474846868251
ENSMUSG00000020695	Mrc2	0.099265042910497	0.014404147252454086	6.8914210033214465	3.4841743076877464e-6	0.020330157085358	3.073172512679004e-5	-0.2420304823945572	0.12557236270919198	-1.9274183998199186	0.05571297397707908	1	0.08388818507303898
ENSMUSG00000058569	Tmed9	-0.10453427828560266	0.01566556436064204	-6.672870244511153	3.502542994322135e-6	0.020433835828875334	3.085238675052161e-5	0.28694798106588737	0.12552248389769444	2.2860285436970864	0.023792270051341338	1	0.03910895252006645
ENSMUSG00000026234	Ncl	0.10743744375896094	0.01824393735604925	5.888939523426793	3.5261880047556414e-6	0.020568254631739655	3.1019140469641875e-5	-0.20301495785363755	0.12633152527542582	-1.6070015572995562	0.10988725407436502	1	0.15326930301136826
ENSMUSG00000031633	Slc25a4	-0.10197482476580214	0.015358709953965538	-6.639543625177502	3.581429293395007e-6	0.02088689563907968	3.1463023698984175e-5	0.10380196376177853	0.12279153849968646	0.8453511131961554	0.39943493674921704	1	0.47084949548725336
ENSMUSG00000061136	Prpf40a	-0.10006274287342064	0.016376692399080104	-6.1100703631119835	3.612177629243558e-6	0.021062607756119185	3.169083840056348e-5	-0.225017306140129	0.12168230373776166	-1.849219641872209	0.06608743508158864	1	0.09776423624929255
ENSMUSG00000037608	Bclaf1	-0.10210311524259692	0.017261156616486067	-5.9151954594443925	3.6623890424988246e-6	0.021351728117768146	3.20885750993905e-5	-0.17868042584752003	0.12124291024952838	-1.4737391694061144	0.1424465741931814	1	0.19301862812832243
ENSMUSG00000090000	Ier3ip1	-0.0725561384231348	0.014453984092990684	-5.019802011427436	3.705592367353717e-6	0.021599897909304815	3.2423933214345025e-5	0.48759394962968206	0.12955890894604088	3.763492249172589	2.2574123532946957e-4	0.8672978261358221	5.423064360963526e-4
ENSMUSG00000026131	Dst	-0.10541270019335776	0.01892060013869633	-5.571319060739947	3.711421447228594e-6	0.021630164194448246	3.243181025599488e-5	-0.2950197800975063	0.12424006701447571	-2.3745945022963677	0.018654773958653947	1	0.0313027677528995
ENSMUSG00000031967	Afg3l1	-0.1044185342807054	0.016274578097773044	-6.416051688307278	3.7182283604366745e-6	0.021666116656264504	3.2448199750229864e-5	-0.12922045189339904	0.12511537593981142	-1.0328103234534691	0.3033794162052027	1	0.3727799362521445
ENSMUSG00000022840	Adcy5	-0.08729691837140355	0.014906620110640601	-5.856251633399412	3.7437557725074656e-6	0.021811121130628493	3.2627699315363075e-5	-1.0073281075143359	0.10766675241384685	-9.355981163455107	3.3202848223394615e-17	2.009436374479842e-13	4.129957302645304e-16
ENSMUSG00000024383	Map3k2	0.0605596218024524	0.012713809664654716	4.763294669324207	3.836857522939943e-6	0.022349695071125168	3.33948710329958e-5	0.7307259461510663	0.12490731591705344	5.850145292020491	2.1901865453040876e-8	1.1073583173057466e-4	9.450116372525177e-8
ENSMUSG00000032050	Rdx	0.08401328903325485	0.013249088443636413	6.341061831586364	3.865326600876414e-6	0.022511662123504236	3.3576448920092416e-5	1.0294563499192586	0.10838382744156516	9.498246871511224	8.680658221309184e-17	5.233568841627308e-13	1.0347596213082325e-15
ENSMUSG00000028107	Tars2	0.0650517075290521	0.013662112671657073	4.761467650900437	3.867925270734051e-6	0.022522928851484377	3.3576448920092416e-5	0.25028156960995435	0.13422395557149425	1.8646564880636538	0.06381346701935604	1	0.0948052862920214
ENSMUSG00000038496	Slc19a3	0.10356542198592908	0.01586916805595757	6.52620361828286	3.8861559671355534e-6	0.022625200040663193	3.369025858201837e-5	-0.34020691266718317	0.12806007463750127	-2.656619665654611	0.008797202566263485	1	0.015807098002734495
ENSMUSG00000028339	Col15a1	-0.10209421359764145	0.017107733367000673	-5.967722982786971	3.892128082711403e-6	0.022656077569463078	3.369601798588048e-5	-0.20708005435312016	0.12434318986739364	-1.6653912013513699	0.09773364784403807	1	0.13817950210867438
ENSMUSG00000026281	Dtymk	0.07518260427534743	0.014514604451895051	5.179790088288039	3.897062262500767e-6	0.02268090236775446	3.369601798588048e-5	-0.3578212600506954	0.13180204838950849	-2.7148383839471357	0.007270008953101275	1	0.013287960808723995
ENSMUSG00000024099	Ndufv2	-0.10907885540162572	0.016931958985342003	-6.442187551721291	3.9159353419632495e-6	0.022786827754884147	3.381476975081126e-5	0.18645019012595965	0.12454776748654905	1.4970175209772103	0.136481705869192	1	0.18608570754647397
ENSMUSG00000030824	Nucb1	0.10045257022594019	0.016604381039821505	6.0497630104386015	3.965432604806155e-6	0.023070886894762208	3.419730870199803e-5	-0.6283427043363528	0.12094641430680983	-5.195215649323919	5.698403417890647e-7	0.0026987638587130103	2.0322761241040896e-6
ENSMUSG00000030682	Cdipt	-0.10595376369540169	0.015373722003368891	-6.8918745683175295	4.006250763552357e-6	0.02330436069158406	3.450409689028077e-5	0.2830878552919246	0.12336336664561633	2.294748133010555	0.02335145865203316	1	0.03843236566542726
ENSMUSG00000025239	Limd1	-0.09692486734818984	0.015729679084319062	-6.161910031897241	4.0751591292528646e-6	0.02370112549573466	3.505169551697235e-5	-0.3697380060048687	0.12401680509575506	-2.9813540650348878	0.003371461525809598	1	0.006582853661669779
ENSMUSG00000026131	Dst	-0.10761960610197831	0.020139547133291472	-5.343695436134153	4.144006315111144e-6	0.024097396722371302	3.559733884259965e-5	-0.26672077159488966	0.12469727061929292	-2.138946347985448	0.033805130829856304	1	0.053560741839743436
ENSMUSG00000039062	Anpep	0.08108723399468908	0.012294802120560286	6.59524514502669	4.169309403881342e-6	0.024240364874166125	3.576799984033798e-5	-1.317494099689664	0.09424752477382044	-13.979084361647134	3.884104295657316e-28	2.4947601891006942e-24	1.6175573585712114e-26
ENSMUSG00000061130	Ppm1b	0.07295458816610512	0.014635232707143326	4.984860140317184	4.190619016788856e-6	0.02436006834459362	3.588279197772994e-5	-0.42475127896161685	0.13059940356729535	-3.2523217362378745	0.0013640310368016628	1	0.00286111706157314
ENSMUSG00000017760	Ctsa	0.0665245804171598	0.012459669583970963	5.339192983314897	4.193596813202784e-6	0.024373184678334582	3.588279197772994e-5	0.8570763730649601	0.11857558804415236	7.228101392554953	1.2855645333381896e-11	7.182449047760465e-8	8.510075079844353e-11
ENSMUSG00000038156	Spon1	0.06279465054194079	0.01325028009846633	4.739118726192742	4.268191482389533e-6	0.024802460704165575	3.647363630405601e-5	-0.5848135712531969	0.1301778904909796	-4.4924185593076595	1.2379959613185146e-5	0.05393948403464768	3.6627758208074755e-5
ENSMUSG00000032078	Zpr1	0.0992664365645694	0.01503265605380746	6.603386401528642	4.3099148723018535e-6	0.02504060540807377	3.6782412269450317e-5	-0.12021089019688161	0.1267962240462505	-0.9480636438592461	0.34449185901183954	1	0.4153850892977651
ENSMUSG00000025888	Casp1	0.0649198219879359	0.013708890453464797	4.735600026005606	4.334750374302287e-6	0.025180564924321983	3.692428249284947e-5	-0.05185138584014615	0.13468352570226316	-0.3849868465336356	0.7006894029422125	1	0.7523721069451303
ENSMUSG00000040463	Mybbp1a	-0.10025405243491627	0.015449652030084802	-6.489081581882461	4.33922560487588e-6	0.025202222313119114	3.692428249284947e-5	0.3950480657572127	0.1233512075894004	3.202628279669629	0.001661410000672583	1	0.0034399237899388284
ENSMUSG00000028980	H6pd	0.08747448244688022	0.014104941429018253	6.201690583905439	4.343373047031229e-6	0.025221967284110348	3.692428249284947e-5	0.8911792052174125	0.11135695397527076	8.0029057315569	1.696071208988306e-13	9.794811231907467e-10	1.3846338157745725e-12
ENSMUSG00000032553	Srprb	-0.09703783334345148	0.014868704012843029	-6.526314146790052	4.3925620900884264e-6	0.025503215495053404	3.7291790978051936e-5	0.4617802807061635	0.12447929659046265	3.709695454220169	3.020324608516118e-4	1	7.107916997151666e-4
ENSMUSG00000034120	Srsf2	-0.06107595632271403	0.012906619983390436	-4.73214183119305	4.4011409702370314e-6	0.02554862333222597	3.7291790978051936e-5	-0.6660173416164915	0.12680158836800445	-5.252436899162267	4.100350900774171e-7	0.0019579175551196664	1.4939262971812869e-6
ENSMUSG00000052253	Zfp622	0.07334889416957614	0.015036476640160681	4.878063919154423	4.4069454435433436e-6	0.025577911354325567	3.7291790978051936e-5	0.37452360206667445	0.13074284854957605	2.864581934855579	0.0046679748501781936	1	0.008897819963549396
ENSMUSG00000035666	Gtf3c4	-0.09863394071668341	0.016538374973956986	-5.963943910571776	4.409272550292463e-6	0.02558700860934716	3.7291790978051936e-5	-0.4793012631320506	0.12315466489059876	-3.891864458060321	1.4544428082771723e-4	0.5705779136871347	3.600539382416777e-4
ENSMUSG00000017485	Top2b	-0.10364521208322103	0.016897715839657802	-6.133681798576154	4.443634829963506e-6	0.025781969283448263	3.750458455022916e-5	0.06174180538713486	0.12395902884060794	0.49808235805497664	0.6190716592534604	1	0.6790284243853593
ENSMUSG00000005973	Rcn1	0.09575910033358476	0.014166532036991022	6.759530143548388	4.44583221112139e-6	0.025790272656715182	3.750458455022916e-5	-0.33941168494514895	0.11951380130697217	-2.839937155654243	0.005196826890853713	1	0.009792417222742678
ENSMUSG00000004565	Pnpla6	-0.10113859985411977	0.015503927724870902	-6.523417913763652	4.466136648808207e-6	0.0259035925630876	3.762763015257106e-5	0.33417598131530674	0.12428144951405078	2.6888645298389933	0.007975306853415028	1	0.014444679079402941
ENSMUSG00000027881	Prpf38b	-0.11351562333357382	0.0179786101908485	-6.313926500912497	4.475158284247122e-6	0.02595144289034906	3.7655423926273735e-5	0.04340280564410198	0.12786005433078595	0.3394555545222502	0.7346673234732453	1	0.7823451996203195
ENSMUSG00000029131	Dnajb6	-0.0960021104550827	0.015064213805091532	-6.372858995312127	4.505949998132982e-6	0.026125498089175032	3.783953222367104e-5	-0.19650807002912876	0.1272207266173807	-1.5446230756104022	0.12477204793319949	1	0.17178192091943142
ENSMUSG00000029076	Sdf4	0.10312188434188013	0.01639399716745144	6.290222164160051	4.5085400096288905e-6	0.02613600643581868	3.783953222367104e-5	-0.21044127114420466	0.1174620665941557	-1.7915679269572389	0.07495435454486435	1	0.10957557274054819
ENSMUSG00000035472	Slc25a21	-0.09416943121618757	0.013433418602346378	-7.0100868590322385	4.611041197949519e-6	0.02672559478331541	3.8650510933131e-5	0.9499192239386179	0.10677979829101103	8.896057485984073	6.40063035483198e-15	3.7661309007831367e-11	6.042488914604653e-14
ENSMUSG00000096727	Psmb9	0.06500852020757689	0.013774926608675783	4.719336955786969	4.655625735990712e-6	0.02697935114006618	3.897457677203421e-5	-0.19380244844794653	0.13533230046910724	-1.4320487258116659	0.1538172691154999	1	0.2065546185265284
ENSMUSG00000015401	Cltrn	0.07406714328476628	0.01566742389218349	4.7274615019332265	4.677885801629639e-6	0.027103670334642126	3.911116718516267e-5	0.11843561717157404	0.12915731514243095	0.9169872960038435	0.3603675324033683	1	0.4314390651843542
ENSMUSG00000020062	Slc5a8	0.046535692659920184	0.009826608512062693	4.735681960138649	4.696758613615034e-6	0.027208322648671894	3.921912649439965e-5	1.521558547133279	0.08160044438803683	18.646449275420242	5.13796644745034e-44	3.3797543291328336e-40	1.126927307474108e-40
ENSMUSG00000020260	Pofut2	0.06487266437802387	0.013754526416183722	4.716459325105807	4.714741144166003e-6	0.027307780707009493	3.931938748873549e-5	-0.22676137163106116	0.13513187798713014	-1.6780745965260526	0.09502102716671719	1	0.13509904035371634
ENSMUSG00000033938	Ndufb7	-0.10095511706627668	0.015456886443486013	-6.531400578984142	4.748592641359336e-6	0.027499099986111917	3.955156908879042e-5	0.17953772068155782	0.12387028806686017	1.4494010103912136	0.14966216848229844	1	0.20167459934743473
ENSMUSG00000042737	Dpm3	-0.09339272706594784	0.014426707609651063	-6.473599492892663	4.858747859600834e-6	0.02813215010708883	4.0417902548891895e-5	0.6232338892563705	0.11873941643127063	5.248753177232549	6.178216534919265e-7	0.002917353847788877	2.186802840224248e-6
ENSMUSG00000004394	Tmed4	-0.10135649459868468	0.01834912837050803	-5.523777072789558	4.869892352449531e-6	0.028191806828330338	4.045945919080545e-5	-0.06018854957640986	0.12209685874538735	-0.49295739624164325	0.6226508277215759	1	0.6821582494851763
ENSMUSG00000006522	Itih3	0.07186868865102336	0.013331623913655758	5.3908427897825195	4.8982416574904615e-6	0.02835102271355479	4.064366974311127e-5	0.4588937059332344	0.12891305828896002	3.5597146792113117	4.7296741543104647e-4	1	0.0010764875799156991
ENSMUSG00000068587	Mgam	0.10049414054676882	0.016433420729335953	6.115229580130735	4.976235531569391e-6	0.028797475021192065	4.1238828460612836e-5	-0.5260056864314956	0.1255096456306935	-4.190958262915057	4.7581940766639866e-5	0.19637066954392274	1.27583198958635e-4
ENSMUSG00000040640	Erc2	-0.1037529291221905	0.018631992399351024	-5.56853646665315	5.005945513733199e-6	0.028964400742460292	4.1432857208005606e-5	-0.2992509415022844	0.12483387197480712	-2.397193460142585	0.017571475349951193	1	0.029638633120399605
ENSMUSG00000032294	Pkm	0.06938121361708541	0.013716490714554806	5.05823355703247	5.098992889716472e-6	0.02949767386700979	4.2149966349666315e-5	-0.6856048202527345	0.12608236170319462	-5.437753631762459	1.7131747550742454e-7	8.338021532946353e-4	6.576831906877792e-7
ENSMUSG00000027673	Ndufb5	-0.09987392753579358	0.014993316038495845	-6.661230062740217	5.121446521054093e-6	0.029622446677776873	4.222970682070889e-5	0.14131443777392744	0.12205980171962494	1.157747561302213	0.24926279281678493	1	0.3160210359796618
ENSMUSG00000022111	Uchl3	0.06494569795730844	0.013825421723053356	4.697556375370018	5.121475082511504e-6	0.029622446677776873	4.222970682070889e-5	0.008786206067741373	0.13582839167781566	0.06468607895013742	0.9484937907606223	1	0.9583982099516117
ENSMUSG00000021870	Slmap	-0.10478578816751946	0.019083805877805077	-5.490822367323902	5.158375881780008e-6	0.029825729348452006	4.2480742555835356e-5	0.06036608565259767	0.12488021664814157	0.48339190364061574	0.6294223951441666	1	0.6879733156226937
ENSMUSG00000032607	Amt	0.06342509363659989	0.01351125986579031	4.69423978715622	5.1962468195863476e-6	0.030039502864028674	4.273913009109771e-5	-0.4489122846702428	0.1327418963322595	-3.3818432392030418	8.785551324613595e-4	1	0.0019028613468057096
ENSMUSG00000026383	Epb41l5	-0.10294744340844655	0.012915129091861216	-7.9710735120194345	5.237620650747231e-6	0.030273447361318994	4.302564779265515e-5	0.6123278117571652	0.11010308131362181	5.561404862167184	1.3565119864701512e-7	6.6306305898661e-4	5.272208429399642e-7
ENSMUSG00000030629	Zfand6	0.06181859748421461	0.013181343811784702	4.689855478084568	5.296708758470803e-6	0.030609679915202772	4.34225581845174e-5	0.5565753666663935	0.12950062327007503	4.2978585941293055	2.784693864448969e-5	0.11768116271161343	7.780588377101578e-5
ENSMUSG00000053931	Cnn3	0.09966061554676707	0.01625065586842228	6.132713433457425	5.304206666083066e-6	0.030647706116627958	4.34225581845174e-5	-0.7124843510790787	0.11911670358348994	-5.981397483684495	1.4611603990946356e-8	7.446073393786264e-5	6.474367290264446e-8
ENSMUSG00000031320	Rps4x	-0.06251170379221418	0.013090575613505673	-4.775321241620595	5.305735073001822e-6	0.030651231516731527	4.34225581845174e-5	1.0164371510694188	0.11234456251523972	9.04749752291338	2.2157909841549503e-16	1.3270372204103997e-12	2.46282173576682e-15
ENSMUSG00000033021	Gmppa	0.06429804752292971	0.013716425905346727	4.687667761750241	5.347536585502335e-6	0.030887371317861484	4.371029904671474e-5	0.21871238655934305	0.1347575580413973	1.6230064549860348	0.10629081712002036	1	0.14899735335529057
ENSMUSG00000024012	Mtch1	-0.09687451711556792	0.014674807979388634	-6.601416335507227	5.407201090596513e-6	0.031226586298194862	4.4143155305366075e-5	0.031953695154485755	0.11913078351284234	0.2682236632065895	0.7889523919365249	1	0.8293621903278332
ENSMUSG00000042460	C1galt1	-0.09340565801769318	0.0151287239876694	-6.1740605548639165	5.46070940988589e-6	0.03153013613268113	4.444582237754196e-5	0.8331158607563572	0.1189710687484406	7.0026761087432625	8.282777170987553e-11	4.5406184451353765e-7	4.959114994094458e-10
ENSMUSG00000028906	Epb41	-0.06213909150538007	0.013269475888296862	-4.682859521240339	5.4609074057122075e-6	0.03153013613268113	4.444582237754196e-5	-0.5199404191750013	0.13036648027231837	-3.9882983577443714	9.575449361989239e-5	0.38426278289662813	2.4535224611327565e-4
ENSMUSG00000030707	Coro1a	0.09283102061715534	0.013849648015086341	6.7027711112972	5.464539559792012e-6	0.03154132233911949	4.444582237754196e-5	0.15274065751377378	0.12270915095178556	1.2447373022227828	0.21542808956735116	1	0.27810806932571525
ENSMUSG00000040850	Psme4	0.045837065525728984	0.009789376290178507	4.682327470823288	5.473593936479441e-6	0.03158811060742286	4.44645038296725e-5	1.3560278596180715	0.09617610686021288	14.099425563035002	3.915646437638892e-31	2.534597939083655e-27	2.3856438481170286e-29
ENSMUSG00000030844	Rgs10	0.06451892111018512	0.013784010468105755	4.68070749506994	5.512397004103679e-6	0.03180653071367823	4.4724503436500875e-5	-9.603592421661754e-4	0.1354215451982241	-0.007091628150900536	0.994349388157025	1	0.995408333192336
ENSMUSG00000038816	Ctnnal1	-0.09571116611388235	0.017051976688940342	-5.612907398352191	5.6247208233138735e-6	0.032449014429697734	4.557963425788829e-5	-0.7971034949885206	0.11492404557576136	-6.935915725861271	7.177992499190822e-11	3.9421534805555997e-7	4.337115761678201e-10
ENSMUSG00000029455	Aldh2	0.08866119057799669	0.01284814031011357	6.900702236899294	5.7871204164976755e-6	0.033380110562358595	4.683794875836987e-5	0.7376012144751967	0.11594796749095503	6.3614846420894455	2.2484514014363566e-9	1.1784133794927946e-5	1.1040903150336736e-8
ENSMUSG00000035674	Ndufa3	-0.09687678173172697	0.015948452113542306	-6.074368913172834	5.797319391089039e-6	0.03343314092841049	4.686285208030207e-5	0.3854784314934527	0.12218137033290079	3.1549689649343513	0.0019515494146396075	1	0.003989187681990873
ENSMUSG00000056692	D17Wsu92e	0.0956404628156317	0.01446658271355775	6.611130265477254	5.804698340826017e-6	0.03346989063320281	4.686492648176097e-5	-0.09513938691286637	0.1275208454800822	-0.7460692920807716	0.4568657894442546	1	0.5251528226291906
ENSMUSG00000016757	Ttll12	0.06426214435637437	0.013772337141281586	4.666030441830619	5.876265071624455e-6	0.033876668137914984	4.7384588445207e-5	-0.22347848220650265	0.13530686014630905	-1.6516419194477834	0.10030393513747975	1	0.14141844722618743
ENSMUSG00000068036	Afdn	-0.09888175746387681	0.015452425675067953	-6.399109081198798	5.89625262168306e-6	0.03398600011138116	4.748756701428951e-5	-0.22149540570190052	0.12646370184225417	-1.7514543894831194	0.0818197178059469	1	0.11837593297342364
ENSMUSG00000026209	Dnpep	0.06715194959777876	0.013944674911353637	4.815598070565575	5.913994294843207e-6	0.0340823491211814	4.752311962011541e-5	-0.7770214032624609	0.12248116580684039	-6.344007245063841	1.721815075585529e-9	9.070521818184567e-6	8.628745771022681e-9
ENSMUSG00000054277	Arfgap3	0.07218702708781483	0.015371710536178846	4.6960959171014505	5.915111697397343e-6	0.03408287360040349	4.752311962011541e-5	0.31244248218051407	0.12898055876096695	2.422399818871522	0.016400622667259813	1	0.02784931539369537
ENSMUSG00000096145	Vkorc1	-0.0942452156454873	0.015193751645086883	-6.20289299489523	6.008911099210821e-6	0.03461733684255354	4.821784760098439e-5	0.759551405651681	0.11926111132124037	6.3688103962553395	2.2407253529627928e-9	1.1748123025583922e-5	1.1019411676005365e-8
ENSMUSG00000002346	Slc25a42	-0.09802946212858196	0.015400278227304201	-6.3654344864223855	6.106341633340282e-6	0.035172527808040026	4.893998531958472e-5	0.548149882162191	0.12120099950508877	4.5226514995792275	1.3185407178109274e-5	0.05736970663195345	3.8905820283389696e-5
ENSMUSG00000028608	0610037L13Rik	0.07293230059195441	0.014857142588092282	4.908904936431603	6.143939507255425e-6	0.03538294762228399	4.9181413573893796e-5	-0.23668520717315156	0.1331900722137547	-1.7770484183933701	0.0772290549445742	1	0.11250103642579107
ENSMUSG00000015149	Sirt2	0.09465235151788813	0.015294322008069705	6.188724905095299	6.15326838951372e-6	0.03543051938682	4.919624058687761e-5	-0.5343764339092126	0.12116395660958654	-4.410358070684963	2.0361921771312552e-5	0.08721011094653167	5.830280693590099e-5
ENSMUSG00000021171	Esyt2	-0.09768698737928852	0.017090409228727663	-5.715895159203339	6.224086958133523e-6	0.03583206861797469	4.970205362198856e-5	-0.5413757122713612	0.12342443301656816	-4.386292884154375	2.0662262621188146e-5	0.08839315949344288	5.903503606053756e-5
ENSMUSG00000004285	Atp6v1f	0.07449243704986859	0.015980455920305094	4.661471326060039	6.255236827472357e-6	0.03600514317893089	4.9890252514870435e-5	-0.12340299770517821	0.13183201520358057	-0.9360624391170391	0.35048697102811077	1	0.42137845228667437
ENSMUSG00000038453	Srcin1	-0.09153947968910128	0.013200677706009635	-6.934453043075792	6.303486207956376e-6	0.036276563126788945	5.015357642435796e-5	-0.5783585841311806	0.12107026156991205	-4.7770491005110065	4.242567836425933e-6	0.019078827560407418	1.3395439713859231e-5
ENSMUSG00000030983	Bccip	0.09821917604163241	0.016363474425505398	6.002342380817382	6.30349661138967e-6	0.036276563126788945	5.015357642435796e-5	0.05054400083373884	0.12974062992489302	0.3895772732335184	0.6974097022727876	1	0.7489727176358647
ENSMUSG00000040952	Rps19	-0.0880768218631933	0.01447827484188054	-6.083378221859563	6.332044448210483e-6	0.03642825171055491	5.031987013191422e-5	1.0052879798439516	0.10474608876547684	9.59737964149439	1.7335605189285912e-17	1.0515778107820834e-13	2.2149180999126464e-16
ENSMUSG00000032135	Mcam	0.08753116575719086	0.013777077650009552	6.35339133456435	6.371006126108392e-6	0.03664602723737547	5.056842015656601e-5	-0.9052732755150024	0.11510081881276374	-7.86504635547054	4.533779628529333e-13	2.601482750850131e-9	3.5388220588046276e-12
ENSMUSG00000003923	Tfam	-0.09771407105312364	0.016929245378686213	-5.771909430537577	6.504826280361385e-6	0.037409255938358324	5.156838183708183e-5	0.3384453475906516	0.12387956295302108	2.7320515145746875	0.006987915575801896	1	0.012829376252448793
ENSMUSG00000026417	Pigr	0.07707133693232215	0.010931833878727629	7.050174544117075	6.5455613813014176e-6	0.03763697794248315	5.182887351259125e-5	1.0578317754593833	0.10531383403681638	10.044566178167807	3.696266381397658e-18	2.2621150254153667e-14	5.275798869760649e-17
ENSMUSG00000064080	Fbln2	-0.07233514688167865	0.015410600476735084	-4.693856478265128	6.5668045108384805e-6	0.03775255913281043	5.193458375158317e-5	-0.14457457024047085	0.1307395073068414	-1.1058215930182376	0.2702657393791808	1	0.3374475455626204
ENSMUSG00000021371	Mcur1	-0.09869908613711557	0.015645761863108346	-6.308359222176414	6.607293660171875e-6	0.03797872395866794	5.219206756774423e-5	0.5244275901562576	0.12130395294566775	4.323252271845994	2.9297856038518514e-5	0.12351976105839406	8.150176202150992e-5
ENSMUSG00000044147	Arf6	0.07228022044697333	0.013922442901915796	5.19163346233061	6.626894524637048e-6	0.03808476283308911	5.228413186104529e-5	-0.5109977598295883	0.13008817534866646	-3.928087687139864	1.2136984985753935e-4	0.48135282453500106	3.053971747849365e-4
ENSMUSG00000068882	Ssb	0.09796065388184128	0.016906979850711643	5.794095382311463	6.635452331148862e-6	0.03812730909478136	5.228895369935271e-5	-0.2919779840733623	0.12719681766843524	-2.2954818322142554	0.02287652165043739	1	0.037707292700370244
ENSMUSG00000039640	Mrpl12	-0.07141905522040669	0.015353269927150588	-4.651716250628138	6.646971880584634e-6	0.03818685345395872	5.2317075328046515e-5	0.39711882004931714	0.12728054324779006	3.1200276956408435	0.0021039601780594576	1	0.004272857398651615
ENSMUSG00000001229	Dpp9	0.0997302687380807	0.015091886786116974	6.608204139844368	6.72868483046635e-6	0.03864956566619871	5.289694884643797e-5	-0.4237355073299129	0.12166980239820467	-3.482667835220923	6.706692190070485e-4	1	0.0014868610044024189
ENSMUSG00000043962	Thrap3	-0.09277821269218677	0.015231656491746121	-6.091143976524308	6.789125001032346e-6	0.038989944880928766	5.3308403946053505e-5	-0.3170028062486224	0.12333249000151379	-2.5703105989729997	0.011200595549468586	1	0.019721680148649532
ENSMUSG00000030647	Ndufc2	-0.09882062421063918	0.015751622904651385	-6.273678897014344	6.8316615394382604e-6	0.03922740055945449	5.3533657265442705e-5	0.18290353464415174	0.12391431626501796	1.4760484515201002	0.14226204837905235	1	0.1928082962583243
ENSMUSG00000048707	Tprn	0.09659774336548384	0.014752678746077014	6.547810402986698	6.834083906226729e-6	0.03923447570564765	5.3533657265442705e-5	0.06650714449049783	0.12804319394584635	0.5194117894202629	0.6044346079635756	1	0.6659341923660956
ENSMUSG00000022437	Samm50	-0.0951096904384171	0.014514803094854952	-6.552599426728052	6.873272958210701e-6	0.039452586780129424	5.377661838885424e-5	0.4838929782429518	0.11740291199291929	4.121643748258442	6.869798191584766e-5	0.27986881506849104	1.8023633213966412e-4
ENSMUSG00000029171	Pgm1	0.08641654960059912	0.013083910789971077	6.604795079070556	7.0272054468560326e-6	0.04032913205950677	5.4915691021749044e-5	-0.840261131640285	0.11753838512649667	-7.148823175815991	3.3148952412348165e-11	1.834131536975224e-7	2.0812987297065926e-10
ENSMUSG00000024645	Timm21	-0.10101348394965047	0.016628066457935062	-6.074878531739686	7.102780795261266e-6	0.04075575620320915	5.544044796301202e-5	0.1403575627159363	0.1267012373709169	1.107783677795037	0.2697428823404181	1	0.3371145614054988
ENSMUSG00000031153	Gripap1	0.0904797773451389	0.014324557289534271	6.316410030433872	7.113649498843582e-6	0.04081100717486563	5.545949490804593e-5	-0.5360230759672018	0.11671176741811366	-4.592708068989546	1.014961433575036e-5	0.044617704619958586	3.056497131772878e-5
ENSMUSG00000022877	Hrg	0.0988285964398912	0.014063984201292653	7.027069642954209	7.1548690092106e-6	0.041040328636832	5.57148379652139e-5	0.04319396859397146	0.12482038965390714	0.34604898056909245	0.7298356638430733	1	0.7787280952626693
ENSMUSG00000009293	Ube2g2	-0.0982304734178151	0.017205753246058785	-5.709164371534628	7.171287770649831e-6	0.041127335364676776	5.577668266060979e-5	0.6573289424950814	0.12161136823866084	5.405160323540488	2.1453205164234728e-7	0.0010372624696907491	8.084884878617669e-7
ENSMUSG00000029484	Anxa3	0.08405695679406969	0.012030752561956525	6.986841127451445	7.291903481659064e-6	0.04181177456383307	5.6647845229417525e-5	-0.9188254949726151	0.11365144195332229	-8.084591617851935	2.516812003409682e-13	1.448425307962272e-9	2.0049180366144922e-12
ENSMUSG00000026434	Nucks1	0.09557691781878667	0.015200470348854734	6.287760551171881	7.335150549599487e-6	0.04205241810085386	5.691252116854717e-5	0.3105958292118303	0.12483250403014744	2.4881006082904533	0.013973820890333052	1	0.024126932946311068
ENSMUSG00000024095	Hnrnpll	0.09965464244469928	0.017237385256776223	5.781308531438888	7.34327210822136e-6	0.04209163572432483	5.691252116854717e-5	-0.31316281918975214	0.1187969962205206	-2.6361173190644815	0.009114356264823998	1	0.016319037883684873
ENSMUSG00000029020	Mfn2	-0.09860749173706271	0.018475633982181848	-5.337164171587352	7.5222706658407596e-6	0.043110133185933396	5.823122468380259e-5	-0.5411839602952696	0.12013437861079776	-4.50482173840143	1.1959615114120282e-5	0.052184116187195435	3.547983203377433e-5
ENSMUSG00000022555	Dgat1	-0.0908644494911538	0.01387942191224498	-6.546702742063742	7.583713878998194e-6	0.04345468052665965	5.857539399948572e-5	0.42570920964065806	0.12496181820808379	3.4067142727691113	8.919977602700204e-4	1	0.0019307056784791886
ENSMUSG00000063065	Mapk3	0.08098428870098837	0.011608912179656268	6.97604456366783	7.584534299021555e-6	0.04345468052665965	5.857539399948572e-5	-1.0626024633625764	0.108475525744734	-9.79578071705415	3.5988804092750394e-17	2.1773226476113987e-13	4.45962958437472e-16
ENSMUSG00000053333	Dis3l2	0.09574745895215539	0.01516737262105498	6.3127254366548025	7.646832638911133e-6	0.043801057355682974	5.898729046194051e-5	0.21015363913163151	0.12558588173380097	1.6733858633654792	0.09613579105755457	1	0.13633049680144593
ENSMUSG00000021764	Ndufs4	-0.10230382572945271	0.014897241424021867	-6.867299979745736	7.688666507401726e-6	0.04403299308788969	5.924054522096412e-5	0.18693792013373656	0.12164166206803052	1.5367918931359865	0.127168088903183	1	0.17483619410425078
ENSMUSG00000002015	Bcap31	-0.0884622370633498	0.013832053989217528	-6.395451979316201	7.745913749292813e-6	0.044353102128450644	5.961182745069791e-5	0.8830943893205369	0.11611759119516656	7.605173171705409	6.304947571647086e-12	3.5471635038086507e-8	4.344141887061553e-11
ENSMUSG00000026341	Actr3	0.08394664990510277	0.014334890137498986	5.8561069600041575	7.804398251436757e-6	0.04468017998947543	5.9991752914081615e-5	-0.26609078194105473	0.1101350953355328	-2.416039874759214	0.01690217163244006	1	0.028597657326164976
ENSMUSG00000022722	Arl6	0.07249660701364818	0.0145253788463618	4.991030373834728	7.855402645408e-6	0.04496432474231539	6.031335986789339e-5	-0.055444474457731346	0.13430221767668474	-0.4128336479983284	0.6802128703100605	1	0.7336175523094899
ENSMUSG00000020311	Erlec1	-0.09697684145195336	0.014887963288820019	-6.513774891208742	7.868195859739392e-6	0.04502968490528854	6.0341175707558506e-5	0.615640923868065	0.12094898377116661	5.090087611094336	1.1616016542377453e-6	0.005394478082280089	3.945967416047684e-6
ENSMUSG00000041133	Smc1a	-0.10017049005327248	0.01783827467502651	-5.615480862255733	7.911801610521864e-6	0.0452713288154061	6.060495296534792e-5	0.17263276078773915	0.12753367393581763	1.3536249326167613	0.17768860738700712	1	0.23458889177498132
ENSMUSG00000038828	Tmem214	-0.06209280765511083	0.013262539644146336	-4.681818816090523	7.953371563513737e-6	0.045501238714862086	6.08325225890026e-5	1.0440478079459974	0.11426425924906183	9.13713364797899	1.247174934040361e-16	7.504251578120851e-13	1.4550374230470876e-15
ENSMUSG00000035493	Tgfbi	0.10220655318485632	0.016145741210286144	6.330248444694658	7.960000296220552e-6	0.04553120169438156	6.08325225890026e-5	-0.35705476036254474	0.12558856860477666	-2.8430514363626918	0.005049218131930317	1	0.009530652698824292
ENSMUSG00000015748	Prpf3	-0.09805418026003213	0.01708605451814805	-5.738842759507956	7.979276786353497e-6	0.04563348394115565	6.090909658260558e-5	-0.366354715125409	0.12643483036206526	-2.897577464028677	0.004232865671671715	1	0.008115459242307659
ENSMUSG00000032040	Dcps	0.07985952967096535	0.011434170892419897	6.984286873297211	8.015063109124723e-6	0.04583013085797517	6.111137341603786e-5	-1.0087614836999297	0.11099768900599594	-9.088130507342706	1.0647434134932453e-15	6.330964336630836e-12	1.103308922958355e-14
ENSMUSG00000106864	Gtf3c2	-0.0983016487716218	0.016886950606865066	-5.821160436844006	8.048050635663197e-6	0.0460107054840865	6.129186710956462e-5	-0.1277367087552618	0.12731435375706832	-1.0033174185449616	0.31720239580907	1	0.38716226385154534
ENSMUSG00000022469	Rapgef3	-0.0712292815323961	0.014619047755423175	-4.872361232007908	8.067291480281315e-6	0.046112638101287996	6.13673733413307e-5	0.08607316287947271	0.1327481592479926	0.6483943985895556	0.5175447974365963	1	0.5835237777814948
ENSMUSG00000001143	Lman2l	-0.09635289082631422	0.015935811958780466	-6.0463119843243875	8.092442295661992e-6	0.04624830771970829	6.14876100524895e-5	0.12863357777438159	0.12665462950581152	1.015624760628898	0.3112392528088699	1	0.38080220964714834
ENSMUSG00000032352	Lrrc1	-0.0857114018646781	0.014608836405299693	-5.86709300362788	8.116461687532351e-6	0.046377462082559856	6.159898258819247e-5	-0.8970192937580995	0.11215267249822293	-7.998198114916191	1.979289224891816e-13	1.1418519538400887e-9	1.603906785688196e-12
ENSMUSG00000064210	Ano6	-0.09798595299182554	0.01631866374326179	-6.004532879249096	8.19683166558819e-6	0.04682849930550533	6.208987377759479e-5	0.15662054431112532	0.12968993565472198	1.207653805366221	0.22884133699833092	1	0.29318068486156884
ENSMUSG00000020902	Ntn1	-0.08468797261029867	0.013600098069380548	-6.227011906698406	8.200015245095726e-6	0.046838487079986786	6.208987377759479e-5	0.7763151371183269	0.10903435806879341	7.11991294183182	5.907880632090902e-11	3.252879076029251e-7	3.6161725171309895e-10
ENSMUSG00000069045	Ddx3y	-0.06835123337690448	0.014109980109381772	-4.8441764514931895	8.229491934416066e-6	0.04699862843745015	6.224144474535369e-5	0.5986573023585492	0.12704336793211868	4.712227895897891	4.847991853217784e-6	0.021719003502415672	1.5183144404651604e-5
ENSMUSG00000015340	Cybb	0.07088999090090713	0.014406952503653566	4.920540335156211	8.27566860850054e-6	0.04725406775453808	6.251882829383875e-5	0.1961929718196062	0.13169514823281708	1.489750947185744	0.1380166867858731	1	0.18778945389806553
ENSMUSG00000078851	Hist3h2a	-0.09609901042138441	0.016350892490998317	-5.877294494737211	8.360290819483998e-6	0.04772890028843414	6.30856807250054e-5	-0.17389198510230783	0.12387585865299652	-1.4037600787851445	0.16238391573893723	1	0.21681943294687642
ENSMUSG00000064120	Mocs1	0.05989270759695244	0.013065816702646369	4.583923757695276	8.380106288270827e-6	0.04783364669344988	6.316277133656591e-5	0.6222882095924195	0.1283656227077933	4.8477793077744264	2.6362226891805653e-6	0.012002721903839114	8.553424701581912e-6
ENSMUSG00000024587	Nars	0.0932569416583557	0.014159529435241913	6.586161078647627	8.513596880630069e-6	0.0485870973977558	6.409550054295865e-5	0.535583720367978	0.12157216012597083	4.40548000309459	2.019186735682435e-5	0.08654234349134916	5.789215128884715e-5
ENSMUSG00000030615	Tmem126a	-0.09339810859768005	0.014299228141043748	-6.531688820992726	8.561310019736242e-6	0.04885083497261499	6.438105134841653e-5	0.6598966973530862	0.11940484044293352	5.526548964892817	2.062430305395885e-7	9.986287538726875e-4	7.803790344741187e-7
ENSMUSG00000056201	Cfl1	0.09473897125169477	0.015279388635894568	6.200442537938499	8.707815388984322e-6	0.04967808679415556	6.54080197026448e-5	-0.44808807979691756	0.12649917772658884	-3.5422212843580723	5.150507739405205e-4	1	0.0011634171275415807
ENSMUSG00000052833	Sae1	0.09792748062576555	0.01648436720090924	5.940627227738781	8.825673411644946e-6	0.05034164114002278	6.62177092914752e-5	-0.347261681815447	0.12446360465163465	-2.790066082268863	0.0058756101594632714	1	0.010964695079202589
ENSMUSG00000098112	Bin2	0.09258997191846811	0.014259719394291031	6.493113178337653	8.855932443566513e-6	0.050505382725659825	6.636906090964426e-5	-0.013792910300177232	0.12377930949172414	-0.11143146909459391	0.9114402265244266	1	0.9305316820063191
ENSMUSG00000007891	Ctsd	0.10016633148814247	0.01474856794817628	6.791597112350725	8.91585288404904e-6	0.050838193144847624	6.674210691358667e-5	0.02279658754326288	0.12416551679612425	0.18359837845071056	0.8545614463550008	1	0.8846781493102431
ENSMUSG00000023089	Ndufa5	-0.09872623215332518	0.01579860844938782	-6.249046077039191	8.994397508948811e-6	0.051277060198517174	6.718244114136922e-5	0.28899489353285635	0.1246003441786779	2.3193747612641853	0.02189844232045764	1	0.03623126740473002
ENSMUSG00000029405	G3bp2	0.09774422420301332	0.0158802962113965	6.155063035465746	8.995095842788188e-6	0.051277060198517174	6.718244114136922e-5	0.19431948165974358	0.12535754038789773	1.5501220034985912	0.12305243956333539	1	0.16974529398883584
ENSMUSG00000019804	Snx3	0.06309284523899382	0.01381764080769153	4.566108362280879	9.045589803519945e-6	0.05155081629026017	6.748297155006943e-5	0.13638190008136816	0.13575194777320654	1.0046404660742994	0.31638222703142554	1	0.38630451918106884
ENSMUSG00000050866	Clrn3	0.06233630619914407	0.013628937809310555	4.573819843580126	9.07638598618138e-6	0.051717247349261496	6.763603600121572e-5	-1.0375572880615702	0.11233302753738786	-9.236440170868176	6.829115282375926e-17	4.1227368959703465e-13	8.260216646697352e-16
ENSMUSG00000038174	Fam126b	-0.09648850866425648	0.01608344848871239	-5.999242558707083	9.238789348205778e-6	0.05263338291672832	6.876836415293441e-5	-0.24633526380761725	0.1276304410177603	-1.9300666975940222	0.05530901126123312	1	0.08335622860717222
ENSMUSG00000021111	Papola	0.09254060961706506	0.013925657839656498	6.645331278608217	9.316743864665284e-6	0.05306817305313346	6.927025381864132e-5	0.39822767651308844	0.12125122327397185	3.284318836217244	0.0013162602058334099	1	0.0027706308875188215
ENSMUSG00000020248	Nfyb	0.06265890797112679	0.013749385694394002	4.557215090465789	9.396560306902722e-6	0.053513410947811	6.978483839663647e-5	-0.22095441284985398	0.13508137276662055	-1.6357134098096255	0.10359979527243392	1	0.14550408813076096
ENSMUSG00000019763	Rmnd1	-0.09398996865693297	0.015568922634874954	-6.037024581674779	9.513004987783897e-6	0.05416705040044151	7.055645657213528e-5	0.27139539581940514	0.12630396803180757	2.1487479771899065	0.03344562259811544	1	0.053016669885714185
ENSMUSG00000026500	Cox20	-0.06917745700876012	0.014771992876608676	-4.683014511759075	9.52947112589245e-6	0.05425127911970572	7.055645657213528e-5	0.6158785664700381	0.1288458365035734	4.779964826049753	3.6047157681904274e-6	0.016282501124916162	1.149112049752521e-5
ENSMUSG00000022568	Scrib	-0.09079816789665997	0.017364389162868702	-5.228987155552759	9.53810873507052e-6	0.0542909149200214	7.055645657213528e-5	-0.8271641001076144	0.1123923731053088	-7.3596105968203265	6.5003349764798395e-12	3.6551383572746137e-8	4.46473947236298e-11
ENSMUSG00000078937	Cpt1b	-0.09080643620882267	0.016318469214836418	-5.564641818624955	9.54335050899702e-6	0.05431120774670204	7.055645657213528e-5	-0.9092151162459446	0.11293891355207399	-8.050503477056408	1.2363833238067806e-13	7.151241144898419e-10	1.0207531079860248e-12
ENSMUSG00000003746	Man1a	-0.0861964320836684	0.014520435681928038	-5.93621527423915	9.749288672784122e-6	0.05547345254814165	7.199811387981989e-5	0.7740503144272376	0.11966173971380065	6.46865335802874	1.8114859680486474e-9	9.537473621776128e-6	9.057429840243238e-9
ENSMUSG00000045095	Magi1	-0.0847799591796389	0.015001616477497285	-5.651388255846327	9.807580600536848e-6	0.05579532603645413	7.23473994972337e-5	-0.8785794816125909	0.11254179910270645	-7.80669483354174	7.276903146859753e-13	4.1609332193744065e-9	5.548322445693763e-12
ENSMUSG00000020427	Igfbp3	0.07059899445665696	0.014585365824917589	4.840399295028027	9.861361651464363e-6	0.056091425073529294	7.262378428208234e-5	-0.08099778757166815	0.1331296529601574	-0.6084128199140494	0.5436698702110261	1	0.6089102546363493
ENSMUSG00000089739	Gm20431	0.09427675075877243	0.015801931176639066	5.966153738104325	9.87450610424412e-6	0.056156316214836306	7.262378428208234e-5	0.10160687747327814	0.1288352620006203	0.788657358982892	0.43141614398245054	1	0.5013863134046121
ENSMUSG00000034055	Phka1	-0.07206628059057324	0.015546096541708732	-4.635651167945992	9.882383195405241e-6	0.0561912308490742	7.262378428208234e-5	0.09695891819290302	0.1339287533490205	0.7239589391250922	0.470021749545539	1	0.5373076984033438
ENSMUSG00000031974	Abcb10	-0.09997493255938796	0.016369849668975475	-6.107260273065476	9.890277808588945e-6	0.05622622934182815	7.262378428208234e-5	0.04878932366422392	0.12779014383380502	0.3817925404926058	0.7031866804873772	1	0.7545610498380532
ENSMUSG00000024072	Yipf4	-0.10119493309428819	0.016977364733787654	-5.960579552896934	9.90023320684314e-6	0.056272925547696404	7.262378428208234e-5	0.13924825818425218	0.12975667529541815	1.0731490913066666	0.2850108737686567	1	0.35364351299222346
ENSMUSG00000026688	Mgst3	-0.09349128987418355	0.015049601767110189	-6.2122102179807825	1.0046158748173508e-5	0.05709232016587005	7.36121654376188e-5	-0.6149098281651296	0.1161350257692535	-5.294783585676232	3.8045059363843867e-7	0.0018193147387790137	1.3915313541639392e-6
ENSMUSG00000040883	Tmem205	-0.07405745827800007	0.012396113250929007	-5.974248280802852	1.0071080456161528e-5	0.0572238791519098	7.371269121417447e-5	1.23886966324274	0.10034278227176584	12.346375446192203	3.774812820408177e-24	2.3939862907028657e-20	1.0392580903048454e-22
ENSMUSG00000016024	Lbp	0.0945474631258662	0.016204771752872143	5.834544575372286	1.0083217782181276e-5	0.05728276022057183	7.371952556305865e-5	-0.3000204255925517	0.12673848742724475	-2.367240067976832	0.019108610280071738	1	0.03200169397884246
ENSMUSG00000026150	Mff	-0.07092141451951035	0.014104237458932155	-5.028376381638138	1.0270371743118181e-5	0.05833571150091127	7.500449064341579e-5	-0.04402428511973388	0.13396446724483319	-0.32862658304216735	0.7428136194302715	1	0.7893594340844938
ENSMUSG00000037916	Ndufv1	-0.10323756842912561	0.0151546296475514	-6.812279206427599	1.0382899478130138e-5	0.05896448613630106	7.574221570520655e-5	0.23532615098782422	0.12487631043720938	1.8844739259505228	0.06220325899064314	1	0.09270610286714198
ENSMUSG00000030189	Ybx3	0.09262377272436932	0.015024987275822594	6.164648995970502	1.0405093885881799e-5	0.05908012308403685	7.582006397464256e-5	0.042127446891699886	0.1293252872112547	0.3257479476761888	0.7450366086845182	1	0.7913383188287537
ENSMUSG00000028657	Ppt1	0.06751270637282836	0.013086180913884207	5.159083984632871	1.0514179991471973e-5	0.05968899981158639	7.653020392022741e-5	0.5522254959088235	0.12809330505536687	4.3111191148524926	2.6473172037046886e-5	0.11211388357689356	7.4251266838776e-5
ENSMUSG00000037706	Cd81	-0.07902794455624333	0.013613181396781356	-5.80525170809289	1.0663834018969997e-5	0.0605279218916737	7.753373242521831e-5	-0.7422822259882401	0.10397272368166634	-7.139201510781696	4.121793675368917e-11	2.2777031850088634e-7	2.5707490411305663e-10
ENSMUSG00000041763	Tpp2	0.08716294448448775	0.014038211124926895	6.208978032088234	1.0715883871140683e-5	0.060812640968723373	7.782617645927781e-5	0.5963771810944428	0.12001412898074058	4.969224758446126	2.0015111984269508e-6	0.00916892279999386	6.584971842824668e-6
ENSMUSG00000028649	Macf1	-0.09897106931023729	0.019295226634660666	-5.129303282318137	1.0820184594968173e-5	0.061393727391849416	7.849703928874374e-5	-0.37523220553956554	0.12177647998935674	-3.081319197043311	0.002391445862825198	1	0.004810673732005442
ENSMUSG00000007476	Lrrc8a	-0.09310452116095842	0.015046128690804877	-6.1879386435035135	1.0848886600281611e-5	0.06154573368339758	7.861858351305397e-5	0.14619951588234656	0.1285196287018362	1.1375656571614243	0.2572934599822408	1	0.3240794346636953
ENSMUSG00000049539	Hist1h1a	-0.08772117031862978	0.015265921152398765	-5.746208790345152	1.0893202662697397e-5	0.06178624550281964	7.885288616121988e-5	6.573141547418642e-4	0.11936771160102591	0.0055066327897687105	0.995613801670217	1	0.9960679359875364
ENSMUSG00000029359	Tesc	-0.06159971075070725	0.012683680590163659	-4.856611636726215	1.0913031031242587e-5	0.06188779897817671	7.89096089951387e-5	-0.9090969791787173	0.11744461484689388	-7.740644220800225	6.501197165111664e-13	3.72323561645945e-9	5.0091191272171836e-12
ENSMUSG00000024150	Mcfd2	-0.07022572089377002	0.014541777958329746	-4.8292389757982574	1.1042261361163903e-5	0.06260962191779933	7.97563992935878e-5	0.3075208872105889	0.1328693310126715	2.3144610187076293	0.021755991914063477	1	0.03601369227535539
ENSMUSG00000038965	Ube2l3	0.07021304919478734	0.014849904996842401	4.728181709560905	1.1132961594205354e-5	0.06311275927755015	8.032334132661318e-5	-0.10775281680560934	0.13315679953011522	-0.809217532907432	0.4194442419619252	1	0.48995972165976703
ENSMUSG00000028843	Sh3bgrl3	0.09741903994818135	0.016153016178310265	6.031012343007024	1.1323278140756812e-5	0.06418034050180961	8.15220636222534e-5	-0.2571781647011819	0.12565975843096658	-2.0466231028326165	0.04227516318269504	1	0.0654981336807472
ENSMUSG00000039704	Lmbrd2	-0.09382810481176454	0.016157423180485818	-5.807120588701653	1.1323885433243103e-5	0.06418034050180961	8.15220636222534e-5	-0.10979809654731851	0.1284435678673222	-0.8548353052660151	0.393831191671956	1	0.4650513639213109
ENSMUSG00000059481	Plg	0.08995913457015961	0.014575830876138268	6.171801479765348	1.135874015992399e-5	0.06435862174612933	8.168361776207635e-5	0.5656348581851133	0.11821164807295147	4.784933358141199	3.9372145023214546e-6	0.017737151332958154	1.247569592747445e-5
ENSMUSG00000021097	Clmn	-0.09485364846909182	0.01671278875203733	-5.675512918664094	1.137759310185704e-5	0.06445406492202013	8.17298718452176e-5	-0.3246289470434207	0.1252163690265703	-2.59254400656304	0.010399545739857503	1	0.018409741987695016
ENSMUSG00000020849	Ywhae	0.08898864295280348	0.015544186264088081	5.724882695107366	1.140940881090066e-5	0.06462289150494134	8.186904032249328e-5	-0.8508945135949906	0.11884479862767947	-7.159711854623931	2.133399606223575e-11	1.1859568410996853e-7	1.3735586505823017e-10
ENSMUSG00000004936	Map2k1	0.06932320057456728	0.01404836405754908	4.934610200204451	1.1592020215598752e-5	0.06564561048093573	8.308877235145946e-5	-0.40119900013273607	0.1319933605347302	-3.039539250363826	0.002716781096697806	1	0.00540399625643034
ENSMUSG00000053825	Ppfia2	-0.09026951349998073	0.015215062793924351	-5.932904433100794	1.1614234913762543e-5	0.06575979808172351	8.315741646633028e-5	-0.49943943863554296	0.123756621210254	-4.03565832479403	8.236164766701103e-5	0.3327410565747245	2.132780958870258e-4
ENSMUSG00000075402	Krt76	-0.06177612574761708	0.012080040794988858	-5.113900424346544	1.1651991748346041e-5	0.06596192528738694	8.330537571959776e-5	-0.93332804618319	0.11664174044123617	-8.001664264032467	1.360928358004955e-13	7.867526837626645e-10	1.1193635744590756e-12
ENSMUSG00000015023	Ddx19a	0.09978137959415932	0.016768041338933202	5.950687833914149	1.1660220522454337e-5	0.06599684815709154	8.330537571959776e-5	-0.058943611648061764	0.12412811261146828	-0.4748610963944998	0.6354876349557796	1	0.6933358710013314
ENSMUSG00000030541	Idh2	0.07104094145290282	0.014311097920252827	4.964045515499329	1.170664670724414e-5	0.06624791371629458	8.35463506872738e-5	0.09719133555222145	0.13422035129914714	0.7241177258998802	0.4699196943516656	1	0.5372843768608097
ENSMUSG00000021494	Ddx41	-0.10049591361614997	0.01909585458097059	-5.262708363745931	1.173169394778993e-5	0.06637792435659542	8.363439455737566e-5	0.01222751031340424	0.12772167282871533	0.09573559477100085	0.9238386145743689	1	0.9400635194751552
ENSMUSG00000025575	Cant1	-0.09222856683298894	0.015949897763811772	-5.782392351269077	1.1874094226832908e-5	0.06717175104119376	8.455794373653737e-5	-0.33154252537064155	0.12906359012644772	-2.568830799188359	0.011289482371451831	1	0.019846324874205998
ENSMUSG00000004070	Hmox2	-0.09663194007185572	0.017990678372544096	-5.3712227004918	1.1924666224054356e-5	0.06744591216325144	8.482627432894883e-5	-0.400577519586006	0.12415800931920894	-3.2263526274501184	0.001501868108044637	1	0.0031342506028968317
ENSMUSG00000041926	Rnpep	0.06174304259194934	0.013718379795299893	4.500753260461805	1.1950478447346914e-5	0.06757995561974679	8.49180865912988e-5	0.2739541739549055	0.1347767541089882	2.0326515189212113	0.04351705653186721	1	0.06712194842468032
ENSMUSG00000031886	Ces2e	0.08998601341427089	0.013549197353215301	6.641427611423542	1.1968822792767016e-5	0.06767172407030471	8.495669253118335e-5	0.26057216731627775	0.12757616736002414	2.0424831119195996	0.04294778415987762	1	0.06640221872854436
ENSMUSG00000071659	Hnrnpul2	0.09215616763748057	0.015959076553153824	5.774530082022115	1.1988023894979536e-5	0.06776829907831931	8.500129011741956e-5	0.09716624821876314	0.12465787803625336	0.7794633580278414	0.43695867980440584	1	0.5065518169684621
ENSMUSG00000025104	Hdgfl3	0.07952359686513592	0.013436048498820201	5.918674443019372	1.2053936322480039e-5	0.06812884809465718	8.537664262854538e-5	-1.0113627514483012	0.10827040897773813	-9.34108184311238	2.213917908126944e-16	1.3261368269680394e-12	2.46282173576682e-15
ENSMUSG00000003184	Irf3	0.07117509448304228	0.014897868295156703	4.777535488495445	1.2067305484632451e-5	0.06819234329365798	8.537943020309842e-5	-0.07531655092664673	0.1344728935401548	-0.5600872335223198	0.5761085113757682	1	0.6397332660306246
ENSMUSG00000029413	Naaa	0.09580082536512333	0.013520404152517219	7.085648053448698	1.2312011318709945e-5	0.06956286395071119	8.701722285404022e-5	-0.14708830480428886	0.12636615454368177	-1.1639849715727792	0.24642447229789322	1	0.3128444969554577
ENSMUSG00000017493	Igfbp4	0.09486322058930713	0.016757711937861727	5.660869511366694	1.2344881073062916e-5	0.06973623318173242	8.715592002226822e-5	0.34318486003676285	0.12359418267899659	2.776707225194371	0.006113734782314556	1	0.011347919567737596
ENSMUSG00000005881	Ergic3	-0.08928106011471776	0.0151165996365372	-5.90616026496615	1.2364248039495473e-5	0.06983327292707044	8.719909121101845e-5	0.7773028614652515	0.12071052553591073	6.4393958854400655	1.7525492879015113e-9	9.23067709937726e-6	8.776083953114113e-9
ENSMUSG00000003604	Aven	0.06907131703398152	0.014505247767670674	4.7618157331947	1.238830256169307e-5	0.06995674456588077	8.72751936359105e-5	0.16180544341551753	0.13135452283628432	1.2318223988159598	0.21960191066682208	1	0.28288578155592975
ENSMUSG00000030172	Erc1	-0.09819079841039899	0.01848991925947807	-5.3105044447430805	1.2440096223381686e-5	0.070236783277213	8.754634561481443e-5	-0.3795020917723378	0.12573419549942774	-3.0182886227960557	0.002918582456872292	1	0.005763582864715723
ENSMUSG00000027405	Nop56	-0.09571665236429121	0.017047464527418933	-5.614714857469961	1.2513592879754048e-5	0.07063923180621161	8.796948840681798e-5	0.19113625378776739	0.12544113145659166	1.5237127692355774	0.12949613339568974	1	0.1776796136061049
ENSMUSG00000034258	Flvcr2	0.06354234684327718	0.014110841347067698	4.503087043529236	1.2674077765164267e-5	0.07153249490658713	8.899848313580638e-5	-0.968445923258327	0.11719467562830561	-8.263565883571776	2.9111156914678927e-14	1.700673786955543e-10	2.5920353518076774e-13
ENSMUSG00000035540	Gc	0.08924604209531092	0.013881388612793257	6.429186919604043	1.2693769208532438e-5	0.07163093964374855	8.899848313580638e-5	0.22059164580215293	0.1282362943082907	1.7201966650083658	0.08749110403228927	1	0.12564196083205226
ENSMUSG00000032554	Trf	0.09569308327858525	0.017476281119331548	5.475597618576499	1.2700543414061124e-5	0.07165646594213286	8.899848313580638e-5	0.10314128441551246	0.12924610540673848	0.7980223782444047	0.42591799648984885	1	0.4959370760755982
ENSMUSG00000070730	Rmdn3	-0.09831860760908198	0.01784614407516258	-5.5092353392975895	1.2850515547127559e-5	0.07248975820134655	8.995360882989291e-5	0.3783790242140435	0.1253076565707852	3.0196001949833016	0.002913323008138064	1	0.005754928067711936
ENSMUSG00000023348	Trip6	-0.09528786211072536	0.01681095518826763	-5.668200351710341	1.2913205371951407e-5	0.07283047829780594	9.029637762746042e-5	-0.136723067824309	0.12737113911575032	-1.0734226668104145	0.2846236256620047	1	0.35329625671684417
ENSMUSG00000038642	Ctss	0.06135830347931213	0.013690785293792324	4.4817227180630175	1.2952899570176071e-5	0.07304140067622286	9.047779105282224e-5	-0.3650268843420687	0.13450565085919192	-2.7138405116094297	0.007279484203986948	1	0.013301584577126942
ENSMUSG00000023013	Aqp2	-0.09064373321999232	0.01586360056588185	-5.713944501032227	1.3062963781144703e-5	0.07364898979809384	9.114984271466823e-5	-0.4495783106661501	0.1234823774087003	-3.6408297289105627	3.5829226143157427e-4	1	8.332727237270232e-4
ENSMUSG00000015766	Eps8	0.09325583981111532	0.015289772605944274	6.09923000260055	1.3116466189723872e-5	0.07393751991147346	9.142621560210072e-5	-0.43633878035209456	0.12723441449020703	-3.4294084827629607	8.374047183876793e-4	1	0.0018215282799970017
ENSMUSG00000020640	Itsn2	0.07047734084042195	0.015517063958835333	4.541925007681143	1.3180819196801122e-5	0.07428709699317113	9.170427072536273e-5	0.040743595368464995	0.1328512767417079	0.306685764470894	0.7594332147977534	1	0.804292701330954
ENSMUSG00000021000	Mia2	-0.08537573488416812	0.014506254478552834	-5.885443069428721	1.318423101917829e-5	0.07429314179306966	9.170427072536273e-5	0.8754060569654327	0.11785960108741486	7.427532834734066	8.496609595202251e-12	4.767447643867983e-8	5.763679498601115e-11
ENSMUSG00000021709	Erbin	-0.09449218483154422	0.01856096403732931	-5.090909321385682	1.3217996307527348e-5	0.07447019119660908	9.184204403751842e-5	-0.7920858470896435	0.11803146446474844	-6.710802502380285	2.4391131576287937e-10	1.318340661698363e-6	1.3647418858161107e-9
ENSMUSG00000003500	Impdh1	0.05952711929530969	0.013303843091072834	4.474430349772666	1.3358057601773144e-5	0.07524593847078812	9.271731964099924e-5	-0.5949107413353666	0.1307041221882783	-4.551583617832667	9.625547680274215e-6	0.04240053753160792	2.9106665319946846e-5
ENSMUSG00000078931	Pdf	0.06902480588983119	0.014647689340872266	4.712334094718094	1.3543215096936053e-5	0.07627538742594385	9.390343028223311e-5	0.0044626477012287965	0.1325219859394514	0.033674772299803576	0.973173298363163	1	0.978227971773543
ENSMUSG00000036707	Cab39	0.0890481007009115	0.015219013723105117	5.851108509464115	1.3693830026151756e-5	0.07710995687726054	9.484779112850374e-5	-0.7778014685355075	0.11742934087698285	-6.623570078199793	5.953226038369699e-10	3.1808086723009303e-6	3.1641540656278366e-9
ENSMUSG00000024621	Csf1r	0.05948074546056095	0.013320043925106556	4.465506705157891	1.3870445055165143e-5	0.07809060566057975	9.593875583279803e-5	-0.587942359181578	0.13086328791028806	-4.492798313188001	1.2360072404448079e-5	0.05386519553858473	3.658536951024218e-5
ENSMUSG00000020097	Sgpl1	-0.09782134691965258	0.017644482320132673	-5.544019095875465	1.3880500843894182e-5	0.07813333925028035	9.593875583279803e-5	0.2680594702396484	0.12719435982416305	2.10747922007093	0.03663414937665794	1	0.05759921216210496
ENSMUSG00000058488	Kl	-0.0816173966195051	0.013011156348896614	-6.272878015675102	1.3935281085645385e-5	0.07842776195001222	9.621631641505418e-5	0.8755338480984532	0.11685365820626016	7.492566869862433	7.708735130178294e-12	4.3299965226211474e-8	5.261771489271076e-11
ENSMUSG00000040048	Ndufb10	-0.09649348304114302	0.015971640090367133	-6.041551305638329	1.4007881748668605e-5	0.07882235059975824	9.657725437612933e-5	0.12038034237019359	0.12494090254263497	0.9634982613409157	0.33703426905695977	1	0.40751295303101714
ENSMUSG00000003435	Supt5	0.0904633858319358	0.016281398406071037	5.556241765953203	1.401691153939263e-5	0.07885914432062294	9.657725437612933e-5	-0.5281631318860017	0.11930820159574577	-4.426880338667637	1.7791046350305775e-5	0.07653708139901544	5.136686484642914e-5
ENSMUSG00000028158	Mttp	0.05987633987827117	0.01195133897181416	5.010011013785363	1.4046207919096114e-5	0.07900991954491564	9.667787458959459e-5	-1.02573366151348	0.11574746936964192	-8.86182365022408	6.801658305673029e-16	4.0544685160116924e-12	7.21320014897897e-15
ENSMUSG00000078185	Chml	0.0734194254593193	0.013910437363327116	5.27800985272247	1.40915210566356e-5	0.07925071442251862	9.688841019086964e-5	-0.09895677212923992	0.13376162907167158	-0.7397993940116963	0.46037307386523074	1	0.5280320525454777
ENSMUSG00000027533	Fabp5	0.05476216345570665	0.01228064941728698	4.459223742566914	1.4242488346294372e-5	0.08008551197121326	9.78241892678674e-5	-0.94299481113739	0.1206517162747931	-7.815842494852294	3.991927309531562e-13	2.292164661133023e-9	3.130736793410927e-12
ENSMUSG00000076609	Igkc	0.09098832262496083	0.015193690146028378	5.988559839674309	1.4268146099030566e-5	0.08021551736874985	9.789822870867688e-5	-0.3557759496514294	0.12832087444120682	-2.772549292550499	0.006276510458907981	1	0.011610750300706919
ENSMUSG00000033423	Eri3	0.06925479145502848	0.014727258831148947	4.70249027663932	1.431071541099712e-5	0.08044053132521481	9.808802854620942e-5	-0.11148281719715394	0.13214950571028397	-0.8436113067389118	0.3999942526641277	1	0.47135216535478075
ENSMUSG00000051879	Krt71	-0.060174454160864525	0.01214486121587151	-4.954725549455069	1.4393542900377033e-5	0.08089171110011892	9.855308250206126e-5	-0.9468155579706857	0.11648785403382371	-8.128019576150539	6.333470495269144e-14	3.6803797048008995e-10	5.412238423229995e-13
ENSMUSG00000036617	Etl4	-0.08520687204608628	0.016431288416981556	-5.18564764270256	1.443217151985476e-5	0.0810943717700639	9.871485301522278e-5	-0.913328929192967	0.11020916121303859	-8.287232378327122	3.083033707558001e-14	1.8001833818431166e-10	2.73401102368351e-13
ENSMUSG00000031766	Slc12a3	-0.09004466760557919	0.017162412875248827	-5.246620522423115	1.4580146337148195e-5	0.08191126212209857	9.962342980107489e-5	-0.7270475073491894	0.11611665664579345	-6.261354127401395	2.9043294635095e-9	1.5154791140592571e-5	1.4020900858321724e-8
ENSMUSG00000027534	Snx16	0.08824411810352234	0.013682578322045167	6.449377889644142	1.4604605902369828e-5	0.08203407135361132	9.968704028796002e-5	0.21853822843806633	0.12735213335159606	1.716015450127734	0.08873838748265399	1	0.1272664755091245
ENSMUSG00000019820	Utrn	-0.08684524418968355	0.017294292134305105	-5.021613114619279	1.4719684250046146e-5	0.08266574674825915	1.0036841695886388e-4	-0.9323697408446312	0.10970883150896628	-8.498584188898507	7.563170742250849e-15	4.446388079369274e-11	7.08912585242316e-14
ENSMUSG00000016487	Ppfibp1	-0.09557339383983443	0.01736095546704589	-5.505076838728683	1.488596493756256e-5	0.08358469312441377	1.0139715247325222e-4	-0.2306466009593641	0.12638279083884937	-1.8249842358162627	0.06973192293458996	1	0.10262492796009885
ENSMUSG00000016427	Ndufa1	-0.09695501434033103	0.016399894007832518	-5.911929326739901	1.4929718502895578e-5	0.08381543967525577	1.0159001835475998e-4	0.11157226879239204	0.1274882234545443	0.8751574519522027	0.38299444570824037	1	0.4539091233357748
ENSMUSG00000021373	Cap2	0.0674696603196981	0.013951296016441387	4.8360854962998525	1.4986989067162329e-5	0.08412196963398215	1.0187436783257037e-4	-0.4744415996996744	0.13103672969273164	-3.6206764379132	3.802800612840419e-4	1	8.782881022284996e-4
ENSMUSG00000020605	Hs1bp3	0.061686973693496676	0.013873561441880762	4.446369012882255	1.5033796386643785e-5	0.08436966532184492	1.0208707969465027e-4	-0.1646846924276374	0.13630134221163162	-1.2082396970965676	0.22849725804126683	1	0.29291096004510725
ENSMUSG00000028015	Ctso	0.07296216157262049	0.013594358480884533	5.367091185304179	1.5072661208493432e-5	0.08457270204085665	1.0224547500194513e-4	0.12763986259821078	0.1331909073335437	0.9583226449427836	0.33916607766061535	1	0.40978934833030645
ENSMUSG00000019487	Trip10	0.09227081129031271	0.017324287247180273	5.326095669842397	1.5141033410645938e-5	0.08494119743372372	1.0260350138213211e-4	-0.6167925061934835	0.12279511779801446	-5.02293997720695	1.2587382178688796e-6	0.0058279579487329125	4.2452575466823306e-6
ENSMUSG00000010755	Cars	0.0935423542766744	0.01527620237361347	6.123403709173805	1.5212001358274439e-5	0.08532411561856133	1.0297836310436812e-4	0.43397908749651887	0.12693331104236175	3.418953495601214	7.92998091280982e-4	1	0.0017323796283628355
ENSMUSG00000028007	Snx7	0.07082299213508521	0.015625050226466874	4.532656926447503	1.5409415317176267e-5	0.08641600109872451	1.0420755682119202e-4	-0.11647608417822558	0.13487691639834784	-0.8635731546102602	0.3889610044378552	1	0.4597383526497373
ENSMUSG00000041237	Pklr	0.048391522192887566	0.010899979553613577	4.439597519872846	1.5467457495168942e-5	0.08672603417541226	1.044926799981639e-4	-1.237348310389576	0.10708727167574833	-11.554578719085937	1.343163073504261e-23	8.500879092208468e-20	3.507148025261126e-22
ENSMUSG00000035875	AI182371	0.08436281392710994	0.014676762256574208	5.748053450230213	1.5505053012516013e-5	0.08692132718816477	1.0463922956139012e-4	0.7534931375301428	0.11673421811117063	6.454775212633551	1.073076379792007e-9	5.690524042037013e-6	5.524915946033965e-9
ENSMUSG00000055932	Fto	0.05795829942708042	0.013059640479932856	4.437970518111721	1.557343169643441e-5	0.08728908465851487	1.049930128714533e-4	-0.7012122333705106	0.12830494416831542	-5.465200409195714	1.4801501349378885e-7	7.218692208092082e-4	5.71560322059349e-7
ENSMUSG00000047230	Cldn2	-0.0928281085445152	0.01599877728577084	-5.802200186077697	1.571588484963153e-5	0.08807181869733509	1.0584495630560435e-4	0.2549275066486973	0.12746962092213945	1.999907937314815	0.047260686465492925	1	0.07228621965200917
ENSMUSG00000001095	Slc13a2	0.06801893441402665	0.015286804374883535	4.4495195167004855	1.610478403107284e-5	0.09023510492610112	1.0835325043400745e-4	-0.6521425013233219	0.12735107638250967	-5.120824415842054	7.729118173373009e-7	0.0036249564233119414	2.6894551867157273e-6
ENSMUSG00000034485	Uaca	-0.09488229823729684	0.018840619074752266	-5.036049922820514	1.62260416483429e-5	0.09089828531401692	1.0905756286628834e-4	-0.5085147348866088	0.12183677574422744	-4.17373762380364	4.699408698374522e-5	0.19408557924286776	1.2616119639047066e-4
ENSMUSG00000068220	Lgals1	0.06383348324964157	0.01422906018262145	4.486134883848766	1.630848703137341e-5	0.09134383586272246	1.0949984149636432e-4	-0.9018856344503237	0.12127077040304947	-7.4369580687321575	3.947181047080416e-12	2.2269995467627708e-8	2.7636800110648124e-11
ENSMUSG00000022956	Atp5o	-0.09561910891927311	0.016763304960157377	-5.704072624493698	1.6353228133131944e-5	0.09157807754553889	1.0968831918043649e-4	-0.21525990658760144	0.12592761541501457	-1.7093939711172805	0.08944351891684198	1	0.12805198833934944
ENSMUSG00000056895	Hist3h2ba	-0.09496468222987861	0.017571166827412055	-5.404574617192076	1.641353879767119e-5	0.091899403728161	1.0998073858317354e-4	0.29086014918440517	0.12589573476987215	2.31032568113666	0.022091029203038275	1	0.03648568578212647
ENSMUSG00000052062	Pard3b	-0.07942951376356958	0.015021911774770665	-5.287576904623527	1.6458515556643276e-5	0.09213477008608906	1.1016992102005368e-4	-0.9975572673812377	0.10702517802817048	-9.320771857241546	7.61431912959569e-17	4.595241594710999e-13	9.17623074592301e-16
ENSMUSG00000040813	Tex264	-0.07000731776341478	0.01577470770886124	-4.437947064089756	1.6568026526980626e-5	0.09273124447151056	1.1077440951774078e-4	-0.023289556462183423	0.13105598814561312	-0.17770692351964082	0.859151323592531	1	0.8888703945344111
ENSMUSG00000031891	Hsd11b2	-0.09057373537809349	0.016608925023886594	-5.45331713207401	1.658249139437305e-5	0.09279562184291158	1.1077440951774078e-4	-0.4179318198281545	0.12622529946925284	-3.310998837677215	0.0011273781204453406	1	0.002399142313237497
ENSMUSG00000022961	Son	-0.09438356032308581	0.017877734660782758	-5.279391495284298	1.6600117798581118e-5	0.09287765908306135	1.1077969078566304e-4	-0.13174847435905362	0.1262042257821922	-1.0439307681062113	0.29802891786122854	1	0.3673717271500344
ENSMUSG00000034462	Pkd2	-0.09463091998171051	0.016917813704268727	-5.593566735980377	1.6623055198475165e-5	0.09298937078027007	1.1082036798983443e-4	0.31885133971261703	0.12862976660571193	2.478830119392117	0.014189534818735432	1	0.024435262786516396
ENSMUSG00000038406	Scaf1	-0.09308337880269842	0.01491367330342543	-6.24147900445953	1.6654787582448738e-5	0.0931502269486358	1.1091953673331244e-4	0.18969025613304866	0.12775017105430686	1.4848532457339014	0.1397462202172819	1	0.18986787714840284
ENSMUSG00000038582	Pptc7	0.10095231867858594	0.017270662806800726	5.845306564542133	1.6838591747659456e-5	0.09416140505291168	1.1203026663255735e-4	-0.2467770430840852	0.12435296183984892	-1.9844886638237311	0.04890673860010282	1	0.07447496875461156
ENSMUSG00000008763	Man1a2	-0.08914702967196281	0.014965945010086959	-5.956658908734346	1.691337573438024e-5	0.09456268373091992	1.1241415387093128e-4	-0.13298956644291474	0.12983355440462332	-1.0243081386222839	0.30723418392903096	1	0.3764619981849206
ENSMUSG00000048126	Col6a3	-0.09493586205318684	0.017770645301597214	-5.342285575001267	1.7006994555407576e-5	0.09506909956472835	1.1292232510048623e-4	-0.27945967991556964	0.12773679822029155	-2.1877773970318306	0.030099534632518604	1	0.04820027692430577
ENSMUSG00000004849	Ap1s1	0.059761022398315294	0.01353127768000334	4.416509941750049	1.7038239377714755e-5	0.09522671988204777	1.1301574103363214e-4	-0.48582001609655706	0.1329385621240109	-3.6544702179294144	3.35589433180449e-4	1	7.842702149058177e-4
ENSMUSG00000035877	Zhx3	-0.08642225079675894	0.015577129157331036	-5.548021713364699	1.725090676530248e-5	0.09639806700451027	1.14311144527382e-4	0.2971591418093929	0.1251139280951365	2.375108401867404	0.01889209338865002	1	0.03167133108211902
ENSMUSG00000053801	Grwd1	0.055820222064619056	0.012649684148361083	4.412775956295417	1.730626769296754e-5	0.09669011760060965	1.1456261712246118e-4	0.7850435607147205	0.1242773122963212	6.31686947689131	1.936153484415719e-9	1.0182231174542266e-5	9.636830504883078e-9
ENSMUSG00000031521	Aga	0.06680248613644892	0.015007132658020332	4.4513823965397785	1.735798688834616e-5	0.09696171475830165	1.1476348768843765e-4	0.4881159827318893	0.1268830731475704	3.846974782555823	1.653700100651907e-4	0.6451084092643089	4.0602039784662494e-4
ENSMUSG00000061032	Rrp1	0.08632737755760825	0.013584595547847932	6.3547992469517585	1.737149448900971e-5	0.09701979672111923	1.1476348768843765e-4	0.021435558864849397	0.12993232080245	0.16497480174651977	0.8692010434170361	1	0.8968704509462282
ENSMUSG00000022546	Gpt	0.0715207974617628	0.011162343622984901	6.407328055596766	1.7521917006152084e-5	0.09784238456235324	1.1564113731241797e-4	1.034980281719102	0.10866663423139589	9.524361263598209	8.435101521808406e-17	5.08805323795483e-13	1.0109830239253062e-15
ENSMUSG00000030352	Tspan9	-0.09345804210647396	0.01690172012128417	-5.529498857857856	1.7636331917694927e-5	0.09846364109649078	1.1627962326496254e-4	-0.28764608608155257	0.12397632294141864	-2.3201695231554114	0.02157155387571087	1	0.03573535360074963
ENSMUSG00000032382	Snx1	0.09392807956683427	0.016514732056660302	5.687532758301918	1.7717772304207196e-5	0.09890060500208457	1.1669964140308643e-4	0.15027948661533433	0.12558740472645938	1.1966127251586776	0.23325347806475294	1	0.2981946542968864
ENSMUSG00000040648	Ppip5k2	0.06862025574873074	0.014341879939156617	4.784606762840185	1.790214273891979e-5	0.09991185862591136	1.1779609922209222e-4	-0.15807487822811475	0.1342114688966426	-1.1778045462705544	0.2404051284803978	1	0.30602935681969773
ENSMUSG00000093445	Lrch4	-0.06956191529647952	0.015646697845342276	-4.445788880443344	1.8139406342043062e-5	0.10121788738860028	1.1923805567496838e-4	-0.3170919663558742	0.13220895285778178	-2.3984152321134604	0.01748125390957669	1	0.02950157751346874
ENSMUSG00000024900	Cpt1a	-0.09636363834986915	0.017347622789356948	-5.554861292521868	1.815913534162988e-5	0.1013098160709531	1.1924861332128205e-4	0.22343343322019726	0.1291016708706216	1.730678090480406	0.0854245329875754	1	0.12299637353572125
ENSMUSG00000026181	Ppm1f	0.06484482069727554	0.013063983878977193	4.963632939078028	1.8350283071176564e-5	0.10235787897102287	1.2038371147392004e-4	-0.7331069129828278	0.1259372727428283	-5.821206835881523	2.570954439978044e-8	1.2952468468609385e-4	1.0963629432958866e-7
ENSMUSG00000019996	Map7	0.06989762553082375	0.01585551476706462	4.408410988712674	1.8381665352457624e-5	0.10251454767065617	1.2046948009877607e-4	0.20902803156768227	0.1310818521929454	1.5946374579755274	0.11253511775269859	1	0.15654991010840522
ENSMUSG00000040170	Fmo2	0.047608352472775055	0.010827042815041257	4.397170426502432	1.847092571885932e-5	0.10299388180835957	1.2093402112447197e-4	1.202854677626987	0.10637070186016113	11.308138957363507	7.087131477310816e-23	4.470562535887662e-19	1.7081804073518374e-21
ENSMUSG00000026020	Nop58	-0.09315605164302714	0.016874921887546936	-5.520384169112678	1.8559921557632878e-5	0.1034715626838033	1.2139590839883135e-4	0.2574451714559278	0.1281167244521294	2.0094579576308305	0.04618262791536351	1	0.07075243112528333
ENSMUSG00000079478	Sssca1	-0.09135390373584833	0.015266330894712365	-5.984011768504874	1.8632624963997736e-5	0.10385825154932338	1.2175041932781042e-4	0.2676779465841187	0.12910461451737487	2.0733414338810845	0.040215485296384176	1	0.06267595766229461
ENSMUSG00000021248	Tmed10	-0.09276493007039859	0.01625237202453592	-5.707777912685792	1.870632178320954e-5	0.10425033129782678	1.2211071164039563e-4	0.11836836635078593	0.1312372278480058	0.9019419892644783	0.368482360849406	1	0.4393212419621474
ENSMUSG00000041891	Lman1	-0.0927552271342469	0.01736699844375163	-5.340889931824618	1.8760150754366425e-5	0.10453156000332972	1.223407254348177e-4	0.1858706131922734	0.12790457811635775	1.4531975002738575	0.14792397876977098	1	0.19967138439215362
ENSMUSG00000001999	Blvra	0.09712130435314134	0.017155757168924573	5.661149397070272	1.8998375339740476e-5	0.1058399490176942	1.2377159379751716e-4	0.16290337178278044	0.1275154573408961	1.2775186254265578	0.20311316939053628	1	0.2638666642822762
ENSMUSG00000021843	Ktn1	-0.09446667929614667	0.017889405554543634	-5.280593533872543	1.9079924428704194e-5	0.10627517906788236	1.2417992358147733e-4	-0.23768985202684312	0.12586372816442543	-1.8884698196475689	0.06071517216661459	1	0.09073491547951942
ENSMUSG00000026159	Agfg1	0.08899807310516022	0.014216744950161415	6.26008790459097	1.9191364790424765e-5	0.10687671051787552	1.2478179873616103e-4	0.12637193018243414	0.1286147887624854	0.9825614254656736	0.32761227316681085	1	0.3976551849174719
ENSMUSG00000021096	Ppm1a	0.08254863153313927	0.015108634205327645	5.463672653086721	1.9239131598083962e-5	0.1071234847381315	1.2496889034096e-4	-0.9311199625925277	0.11704584231145189	-7.955173325293127	2.155539369798423e-13	1.2424528927518111e-9	1.7360402757984853e-12
ENSMUSG00000004233	Wars2	0.0698924498280308	0.015731657129260477	4.44279005407718	1.9258791242893153e-5	0.10721369084918618	1.2497322128031258e-4	-0.3911148330252127	0.13352720599382864	-2.929102201414214	0.0038366493540419253	1	0.007427229405588664
ENSMUSG00000059482	2610301B20Rik	0.0936278921854794	0.016387602612919223	5.7133367458927475	1.9532562823225717e-5	0.10871824467407434	1.266248900264288e-4	0.08671409910934134	0.13093220412343978	0.6622824360887513	0.5087600810866291	1	0.5747023748583724
ENSMUSG00000038736	Nudcd1	0.06043654683103141	0.013791171278572897	4.3822635228184446	1.965348241755672e-5	0.10937162965370315	1.2719737454185799e-4	0.23937089554898802	0.13549189685825627	1.7666805255476192	0.07893078307382491	1	0.11465001161716731
ENSMUSG00000008892	Vdac3	-0.08414338097247093	0.01489234036264011	-5.650111327267168	1.9659533420831244e-5	0.10938564395350504	1.2719737454185799e-4	0.7385934016023412	0.11748763570653137	6.286562812849943	3.821635424325987e-9	1.9857217664797827e-5	1.8156217394992775e-8
ENSMUSG00000026197	Zfand2b	0.0683302341956241	0.014237688625266665	4.7992504959241105	1.978931395322079e-5	0.11008795352176726	1.2791128272317563e-4	0.0017123342924999759	0.13423512569572177	0.01275623115503627	0.9898361795594481	1	0.9918513564072857
ENSMUSG00000006932	Ctnnb1	-0.08100476440936584	0.015438551350075233	-5.246914854415476	2.0033911377062857e-5	0.11142861507922361	1.292779429942727e-4	-1.0452120791342336	0.10990302033851848	-9.51031260027993	2.252791070069627e-17	1.364966109355187e-13	2.8397251419651623e-16
ENSMUSG00000026193	Fn1	-0.08626940637400367	0.015056045138368924	-5.729884945293778	2.0040045874492117e-5	0.11144269510805066	1.292779429942727e-4	-0.5264777415900248	0.12416561996597889	-4.240124937436615	4.347649163477423e-5	0.18003615185960006	1.1724398153967804e-4
ENSMUSG00000017776	Crk	0.08075421584979779	0.012682627159853356	6.367309772018206	2.0108400807445865e-5	0.11180270848939901	1.2959184849460704e-4	-0.6563117405298989	0.12354927277338475	-5.312145719657226	4.322813317046406e-7	0.0020628465148945447	1.5723665907222416e-6
ENSMUSG00000031400	G6pdx	0.0876128997277332	0.013342789703087332	6.566310470100628	2.0136139073261247e-5	0.11193679710825927	1.2964363512921623e-4	-0.12634473450020908	0.129237678180522	-0.9776153230153826	0.33002353206388624	1	0.39991801859675347
ENSMUSG00000020109	Dnajb12	-0.08585299296405197	0.01399115319609309	-6.136234216063453	2.032946729945211e-5	0.11299117925035482	1.3055411095679503e-4	0.9008812424321923	0.11671328684318374	7.718754794752876	3.4195436680426762e-12	1.930332400610091e-8	2.4039099717650437e-11
ENSMUSG00000042312	S100a13	-0.06606264623789504	0.014886655880110952	-4.437708963646889	2.0332624781827448e-5	0.11299117925035482	1.3055411095679503e-4	-0.08748751896906184	0.12742190807174036	-0.6865971503095458	0.4932115730747223	1	0.5595400260054608
ENSMUSG00000031708	Tecr	-0.08131702047805078	0.01427458501925735	-5.6966293849067275	2.035190856632521e-5	0.11307520399450287	1.3055411095679503e-4	1.0736844914242645	0.11076037894574617	9.693759642608194	1.6509302620454933e-17	1.0016193899830007e-13	2.1134476895446198e-16
ENSMUSG00000022427	Tomm22	-0.08476607351962773	0.015579416727213349	-5.44090160779656	2.035691760511728e-5	0.11308267729642649	1.3055411095679503e-4	0.4241208580453387	0.1221893626964956	3.4710129317787377	6.780448112716192e-4	1	0.001501189387001095
ENSMUSG00000021606	Ndufs6	-0.09739507245446301	0.016328737229030322	-5.964642034982811	2.0443281382667635e-5	0.11354198479933604	1.3098032278281696e-4	0.18992446941045113	0.12693983500516262	1.4961770621706492	0.13696714351570063	1	0.18659292015182405
ENSMUSG00000024960	Plcb3	0.06610641045310538	0.014962931742273896	4.418011897116312	2.0652701189113715e-5	0.11468444970314846	1.3219335975133098e-4	-0.7031399664131371	0.1269888406092667	-5.537021702376477	1.0649734985054837e-7	5.226889930664914e-4	4.188598697050856e-7
ENSMUSG00000045482	Trrap	-0.09729990822124651	0.017497982938318703	-5.560635678079795	2.0713727770063272e-5	0.11500261657939129	1.3230900031097935e-4	0.20932237844478874	0.13024042516323592	1.6071997475625253	0.10983209294056412	1	0.15324325096456998
ENSMUSG00000074652	Myh7b	-0.08902431902519142	0.01601444622882831	-5.559000776744614	2.072362513391554e-5	0.11503684311836516	1.3230900031097935e-4	-0.03246368539186778	0.12110207060166933	-0.2680687888372099	0.7890284667860541	1	0.8293621903278332
ENSMUSG00000023186	Vwa5a	0.08572431990305754	0.013455337602308362	6.371027055341287	2.073109108216105e-5	0.11505755550599384	1.3230900031097935e-4	-0.6810518070479066	0.12200346672566727	-5.582233237513618	1.260270230625181e-7	6.171543319371511e-4	4.924333798998628e-7
ENSMUSG00000029581	Fscn1	0.08842169001722615	0.01518890023150828	5.821467563122294	2.0842263945878708e-5	0.11565372263568095	1.3288962864717237e-4	-0.3963154980812141	0.12717866302624017	-3.1162106020838114	0.002248599186791217	1	0.0045483500304599475
ENSMUSG00000027668	Mfn1	-0.09763714558701017	0.01891012194505171	-5.163221362121321	2.1297184106749454e-5	0.11815677742424598	1.356587332259549e-4	-0.2425765156145671	0.12873702515447452	-1.884279330856791	0.061191897926561815	1	0.09134362258547567
ENSMUSG00000027620	Rbm39	-0.09540453659755806	0.015496165647620382	-6.15665441161624	2.146164732081709e-5	0.1190477576885724	1.3657411931429055e-4	-0.4039020539325028	0.12527716899482183	-3.2240675389878706	0.001522070252750945	1	0.0031723858926516377
ENSMUSG00000024477	Pggt1b	0.08569342654345229	0.013952108578113673	6.141969585721075	2.1857648145622335e-5	0.12122251661562147	1.389597341045362e-4	-0.3232637115619355	0.1279135025525957	-2.527205534294672	0.012696462870241343	1	0.022072054342453906
ENSMUSG00000039768	Dnajc11	-0.08548521072211877	0.014857312776703891	-5.753746455156997	2.2069146609920505e-5	0.12237341795200919	1.401689041440897e-4	0.5999102689442196	0.1222668244298489	4.906566206668929	2.8099923439029317e-6	0.012782655172414436	9.099286231732918e-6
ENSMUSG00000010110	Stx5a	-0.08180925068478083	0.013867425759394219	-5.899382632667836	2.214619988329295e-5	0.12277853215297611	1.4052265692581254e-4	0.6598114920462634	0.1246504267796332	5.293295090057974	5.718935979371327e-7	0.0027073442926343863	2.0373902947624977e-6
ENSMUSG00000025873	Faf2	-0.08748195270979366	0.014056138709185215	-6.223754227227932	2.2281444005132427e-5	0.12350604412044905	1.4124460650652348e-4	-0.01570528824793597	0.13010853620209953	-0.12070913028750638	0.9041074322288538	1	0.9247671232808733
ENSMUSG00000000738	Spg7	-0.09265982698405359	0.016827495605951946	-5.506453791690753	2.2469417911294574e-5	0.12452551406439454	1.422991047702775e-4	0.038213886331546314	0.12746366118738256	0.29980220225565785	0.7647520392165256	1	0.80927443197889
ENSMUSG00000071356	Reg3b	0.06606786291254256	0.014469343464646959	4.566058098901764	2.2517810353037776e-5	0.12477118716618232	1.4246845396441207e-4	-0.5732049211744226	0.13012829630817024	-4.404921430900447	1.801688887975461e-5	0.07741857151630556	5.1893151779337016e-5
ENSMUSG00000005580	Adcy9	-0.08647785607095523	0.01582580584688351	-5.464357196571121	2.270493510947853e-5	0.12578534050651105	1.435143833048691e-4	-0.5054908522347517	0.12427199163217864	-4.067616890947624	7.201700582525663e-5	0.29282114568549344	1.88418249833077e-4
ENSMUSG00000025538	Sumf2	0.05863554349179718	0.013488333903383424	4.347130187597817	2.2734981108496596e-5	0.12592906035996265	1.4356638742217618e-4	0.4607573161745373	0.1325166593258396	3.476976544070589	6.319847255091047e-4	1	0.001408692240464061
ENSMUSG00000024767	Otub1	0.08807051999661492	0.01347506792896806	6.535812692067036	2.2802415755821005e-5	0.12627977845573674	1.438541665132332e-4	-0.10455776622710984	0.12927566678495644	-0.808796959454376	0.42005066743060737	1	0.4904069183274302
ENSMUSG00000006390	Elovl1	-0.07503339420314742	0.012587475378461829	-5.960956581614096	2.2848944565398776e-5	0.12651460605861303	1.44009631456249e-4	0.9859544737171457	0.11447363736666713	8.612939156978685	2.442372300138888e-14	1.4295205072712913e-10	2.2056116136933156e-13
ENSMUSG00000025495	Ptdss2	-0.08967722092595298	0.016282827851219536	-5.507472150744161	2.2923234192316165e-5	0.12690302448866228	1.4433959902912955e-4	0.3981610729790974	0.12742529896089227	3.124662655108197	0.0021340348660493077	1	0.004332597784203778
ENSMUSG00000025921	Rdh10	-0.05779202563310653	0.013071287165435534	-4.421295691974869	2.3034995498858667e-5	0.12749870008618272	1.4490465619740922e-4	1.0839041516831067	0.11274735802798427	9.61356585769467	5.948942618816694e-18	3.630044786001947e-14	8.17203391060832e-17
ENSMUSG00000001674	Ddx18	-0.06629863619562201	0.015201885101874327	-4.361211504450042	2.3352269569590573e-5	0.12923145979811423	1.4676020417182995e-4	-0.16031382730069893	0.12702357949944873	-1.2620792764023365	0.20853909496003814	1	0.27006243748023046
ENSMUSG00000020736	Nt5c	0.08571574265628894	0.014371219920240555	5.96440268341911	2.3495568300610992e-5	0.13000097940728061	1.4751988494085907e-4	-0.7071124170636415	0.12326375827379082	-5.7365800537496066	4.7200880079532134e-8	2.3524918631638816e-4	1.9447826607596834e-7
ENSMUSG00000037331	Larp1	0.06738345444999719	0.015367518969433912	4.384797219643801	2.3913135936518016e-5	0.13228746800081767	1.4999850759036087e-4	0.2827072113490201	0.13088607771327215	2.1599486842927447	0.032085755701784194	1	0.051082572590791187
ENSMUSG00000069805	Fbp1	0.06883101783456788	0.014538084330026907	4.7345314741643465	2.39515216880102e-5	0.1324758664563844	1.5009620257819725e-4	0.02378151159812263	0.13514079878099558	0.17597581050754413	0.8605081971719153	1	0.8898544613218925
ENSMUSG00000017781	Pitpna	0.07975044703060778	0.012810298732907417	6.22549471276129	2.4063987037807586e-5	0.13307384831907595	1.5065750210159268e-4	-0.7106501002636206	0.12275613553769933	-5.789120821951703	4.494271766112385e-8	2.243989892819914e-4	1.8622360340692376e-7
ENSMUSG00000047215	Rpl9	-0.05476250058573984	0.012601420702328305	-4.345740204961305	2.435539043507606e-5	0.13466095371553555	1.5219452119122738e-4	1.1484014113686123	0.1047929977110174	10.95876095209628	9.030726567665513e-22	5.674005502464242e-18	1.9940329132630565e-20
ENSMUSG00000030004	Nat8	-0.04486440059546562	0.010093465766912536	-4.444895502844616	2.4355749363884868e-5	0.13466095371553555	1.5219452119122738e-4	1.5069972768687023	0.08836349360808839	17.054523484014428	1.3582565791466439e-39	8.902013619727104e-36	3.3101215891795988e-37
ENSMUSG00000015363	Trabd	-0.09042722058577446	0.01538670860490359	-5.8769697215788055	2.4785254271512924e-5	0.13698810035865194	1.5473147353563097e-4	-0.22706351777390235	0.12857583866321232	-1.7659890080022398	0.07946272294941549	1	0.11537173808630934
ENSMUSG00000029823	Luc7l2	-0.060247795557613504	0.013943221142346467	-4.320938106234078	2.5328506981990083e-5	0.1399653295824772	1.5797305776445e-4	0.04183646299872849	0.1369857166393019	0.3054074835326692	0.7603991795251928	1	0.8050565730129958
ENSMUSG00000027342	Pcna	0.08009680713219759	0.01332663714747342	6.010278980799222	2.5432146524746715e-5	0.1405126095492256	1.5846924633791041e-4	-1.0295621228241398	0.11016668995076527	-9.345493844684475	8.970067635217267e-17	5.407156770508969e-13	1.0673245034309154e-15
ENSMUSG00000032777	Gtf3c1	-0.09468257683341896	0.019322044010090283	-4.900236061152443	2.5810709314207368e-5	0.1425783582516815	1.6067593877718494e-4	-0.46129994856720963	0.12611557227436243	-3.6577556621133107	3.3602385228547973e-4	1	7.848906453810637e-4
ENSMUSG00000041765	Ubac2	-0.0848421442596328	0.014290402107818338	-5.937001885567328	2.5870189661300145e-5	0.1428810574993607	1.6089399619220697e-4	0.7487827301973958	0.12017923323845797	6.230550071089832	3.8669357829683654e-9	2.008486445673769e-5	1.834494408935245e-8
ENSMUSG00000107283	Mpv17	-0.0895508647994833	0.015260216608079694	-5.8682564670851125	2.589795807632762e-5	0.1430085244974811	1.6091460258945773e-4	0.41426392707094717	0.12516687141355143	3.3096930712777732	0.0012337705109741006	1	0.002607003841428896
ENSMUSG00000036594	H2-Aa	0.06664799175017382	0.01499381105899582	4.445033453331873	2.6447547379891372e-5	0.14601690908438025	1.6409021341098548e-4	-0.24956483116866757	0.132406633984568	-1.8848363081094135	0.06104340045149249	1	0.09114263103490368
ENSMUSG00000024665	Fads2	-0.09515036401922056	0.017109792039113093	-5.561164262061527	2.6458923469461334e-5	0.14605325755142656	1.6409021341098548e-4	0.13746674692297126	0.13197710744385058	1.0415953916966716	0.2992627680334122	1	0.3686959894378799
ENSMUSG00000033557	Fam20b	-0.09256468573087048	0.01787255067723634	-5.179153630755512	2.6497814059528643e-5	0.14624143579453858	1.6417666338201364e-4	-0.16479819455354744	0.13019545686632353	-1.2657753082947574	0.20734410826674984	1	0.2686735392664856
ENSMUSG00000020283	Pex13	-0.08020069463740698	0.013497165585996897	-5.94203976578712	2.6528476455475216e-5	0.14638413308131223	1.642120179464035e-4	0.7439182823126109	0.12278956908664608	6.058481089608412	1.048571191429668e-8	5.3728787848856186e-5	4.7354828000049526e-8
ENSMUSG00000025525	Apool	-0.09273313728919808	0.01676785738330082	-5.530410664248099	2.6594871374114763e-5	0.14672390537099114	1.6446828349781498e-4	-0.030319944640046424	0.1316214818287798	-0.2303571135864297	0.8181160001008652	1	0.8544767112164592
ENSMUSG00000022201	Zfr	0.06811399632608928	0.015621950572159935	4.360146705845814	2.6671469849117643e-5	0.1471198276877329	1.647871094903231e-4	0.08596308012511858	0.13324082966562473	0.6451707058628178	0.5196297389366749	1	0.5855735026893854
ENSMUSG00000029916	Agk	-0.0885484936770873	0.01514742337495853	-5.845779277779625	2.6818107832783074e-5	0.14790186469779865	1.655376637333139e-4	-0.15187157377912963	0.1255643585252981	-1.2095118038494281	0.2288110706989153	1	0.29318068486156884
ENSMUSG00000029465	Arpc3	0.08329801968074496	0.016122840106060222	5.16646069382249	2.6978100813532217e-5	0.14875724788581665	1.6636916902815557e-4	-0.16978024969531932	0.11781985328186782	-1.4410156265357366	0.15153389193333333	1	0.20382113837312618
ENSMUSG00000025007	Aldh18a1	0.08742150386810275	0.01511620614836361	5.7832966162324055	2.7171557916873766e-5	0.14979679879572508	1.6740529128560802e-4	-0.561459693159515	0.12492162985434502	-4.494495419361408	1.3075975493386857e-5	0.056906645347219606	3.8600232726103874e-5
ENSMUSG00000055239	Kcmf1	0.06676261625127208	0.01423795676227366	4.6890587860312305	2.7422767091008636e-5	0.1511542922056396	1.6879495552744324e-4	0.04393359764262425	0.1350291611244302	0.32536377532656946	0.7452771943785633	1	0.7914660973226189
ENSMUSG00000019461	Plscr3	-0.08110257203163593	0.014977178408441875	-5.415076846912802	2.7685826610702657e-5	0.15257659045158234	1.7014842038127405e-4	-0.8108097414529682	0.1181878843677345	-6.8603456757901045	1.7264946417935315e-10	9.390404356715017e-7	9.947753715412817e-10
ENSMUSG00000022453	Naga	0.08113520089276767	0.014658004056359971	5.535214793283118	2.7694370551420138e-5	0.15259598173832495	1.7014842038127405e-4	-0.8871881304421741	0.117683617489523	-7.5387564502863595	2.704506559924449e-12	1.5302098116052532e-8	1.9280230947240383e-11
ENSMUSG00000032353	Tmed3	-0.0855149925396249	0.014146069390814442	-6.045141599203019	2.786156564908241e-5	0.153489365160795	1.710159533311215e-4	-0.01798186213132787	0.13074699410205767	-0.1375317440742974	0.8907990455134676	1	0.9144239811979121
ENSMUSG00000025726	Slc28a1	0.05735418428501848	0.013147327488480515	4.362421513822587	2.798121908845614e-5	0.1541205547392164	1.7153777922187155e-4	-1.103891013864158	0.11259819636697878	-9.803807249863654	1.76738672398644e-18	1.0841150164932822e-14	2.6016565198726564e-17
ENSMUSG00000027204	Fbn1	-0.08541732610477097	0.015309124375961514	-5.57950435355361	2.7998719587278123e-5	0.15418894876714062	1.7153777922187155e-4	0.08874935307882616	0.1298304027326879	0.6835791248491706	0.49539841823544406	1	0.5616336305977295
ENSMUSG00000018830	Myh11	-0.09032000454853188	0.018231829360947197	-4.953973776323205	2.8031666332350384e-5	0.1543423548259212	1.715798739226656e-4	-0.19331903241936083	0.11854061192403176	-1.6308253288185466	0.1047552267571896	1	0.14697001962948988
ENSMUSG00000027324	Rpusd2	0.0847701253577254	0.014566947380410113	5.819347262263455	2.826516459040733e-5	0.15559973107019237	1.7284831134282549e-4	-0.2923711730901736	0.128896574456264	-2.2682617775026928	0.025044973585232246	1	0.04087200550367762
ENSMUSG00000035498	Cdcp1	-0.08658834966135791	0.014933392604656663	-5.798303972424669	2.838341461267941e-5	0.15622231402818748	1.7337201558241205e-4	-0.10110013463767123	0.12825816918922592	-0.7882549335981318	0.43193240608718786	1	0.5016973048638474
ENSMUSG00000034473	Sec22a	-0.08891654473676346	0.015538755430867962	-5.72224365923988	2.8403500425203675e-5	0.15630446283989582	1.7337201558241205e-4	0.2579079266994347	0.13166288167558424	1.9588506906214975	0.052164875473155965	1	0.07899767102724195
ENSMUSG00000005107	Slc2a9	-0.08197499596155984	0.014401248712719828	-5.6922144459011985	2.847302623798229e-5	0.15665859036137855	1.7363532219270017e-4	-0.5875088232319924	0.12425952698858453	-4.7280787032608425	4.9222029110844764e-6	0.02204654683874737	1.5408227951920007e-5
ENSMUSG00000053436	Mapk14	0.09134738013351767	0.015956002674408127	5.7249539247088475	2.8524061993053577e-5	0.15691086502378773	1.7378548880953013e-4	0.2603170461688457	0.12775608430178448	2.03760977484193	0.04315266134056684	1	0.06665364122557038
ENSMUSG00000027882	Stxbp3	-0.06675789879332956	0.015218745043513133	-4.386557406833265	2.862134589610036e-5	0.15741740242855198	1.742168880632196e-4	-0.34876988247860635	0.1323102459767256	-2.636000559926082	0.009113377029971175	1	0.016319037883684873
ENSMUSG00000005510	Ndufs3	-0.09120508004088065	0.01539319221284922	-5.925027036610943	2.8666714262865558e-5	0.1576382617314977	1.743317743527314e-4	0.16635063742856504	0.1267894967719662	1.3120222231637253	0.19211962269375166	1	0.25092241312522545
ENSMUSG00000035376	Hacd2	-0.07166310082127013	0.012304925523582165	-5.823936169619971	2.869668126610864e-5	0.1577743536010653	1.7435287417451046e-4	1.177845942141356	0.10624644735285067	11.08597954555281	3.492139119407658e-20	2.1721105322715634e-16	6.365173242576839e-19
ENSMUSG00000040697	Dnajc16	-0.08222064035548757	0.014546510291121586	-5.6522587692850745	2.8826754114574885e-5	0.15846066736781814	1.749815886290616e-4	0.6453881454677641	0.12526034188843926	5.152374133247751	8.749064055096251e-7	0.004084938007324439	3.010922671680614e-6
ENSMUSG00000020153	Ndufs7	-0.09138154550644018	0.015304265454229313	-5.970985394871533	2.9003233173125715e-5	0.15940176951949894	1.7589057537250433e-4	0.1892776044564837	0.1263894092960199	1.4975748799740942	0.13702286403749844	1	0.18663018947769403
ENSMUSG00000021240	Abcd4	-0.09519703653656228	0.018457338713463348	-5.157679447423406	2.9284867243881678e-5	0.16092034550512982	1.774350151609037e-4	0.1851073784333522	0.13172594874756013	1.4052461203987405	0.16179446240873777	1	0.2161200898598243
ENSMUSG00000020088	Sar1a	0.08716488026546901	0.016334867117085653	5.336124232948173	2.9371291257964236e-5	0.1613658741712555	1.7779493696173384e-4	0.541961497134662	0.12153383395404531	4.459346665057813	1.5553006935059848e-5	0.06728230800106891	4.538305349565135e-5
ENSMUSG00000018566	Slc2a4	-0.0870305329494207	0.017274863199625408	-5.037986810298324	2.993005447791277e-5	0.16440578924717486	1.8078345485212583e-4	-0.6333451300397323	0.12417464124661957	-5.100438573298265	8.528441311580718e-7	0.003986193469032828	2.942692387530211e-6
ENSMUSG00000002279	Lmf1	-0.08941256953023778	0.01673722659470052	-5.342137720627403	2.9930402287256394e-5	0.16440578924717486	1.8078345485212583e-4	0.14943032156967667	0.1300736426991731	1.1488132297122684	0.2524437221791277	1	0.3188520102761011
ENSMUSG00000045205	Dpy19l4	-0.06758415204123533	0.014462780075839468	-4.672971011578666	2.995180465250706e-5	0.16446535934691628	1.8078345485212583e-4	0.18481221531855624	0.13450602317494126	1.374006984640277	0.17112611305352216	1	0.2269723491014263
ENSMUSG00000050856	Atp5k	-0.09420631307307623	0.01905084001671437	-4.944995233303295	2.9974885903293203e-5	0.16456212360907968	1.8078345485212583e-4	-0.2870691787174081	0.12608563996837951	-2.276779328632515	0.024012949673409594	1	0.039442139004252405
ENSMUSG00000026579	F5	0.06838300646604607	0.015203533517322966	4.497836400211188	3.0317645095533925e-5	0.1664135539293857	1.8268324608847365e-4	-0.0037051873578822707	0.1353853831642087	-0.0273677059611986	0.9781965492308601	1	0.9820770970306774
ENSMUSG00000006304	Arpc2	0.07795539815122712	0.014408277618093629	5.410459196964132	3.0353669826655766e-5	0.16658094000868684	1.8273298029221861e-4	-0.4993160746810072	0.11554529860766186	-4.321388067691552	2.9415389571405488e-5	0.12395645165390273	8.177155191375079e-5
ENSMUSG00000021957	Tkt	0.08450484458378668	0.013578414473701094	6.223469223704808	3.041520601699184e-5	0.16688823541523423	1.8293606544040795e-4	-0.5148159505909896	0.12648541681571412	-4.070160525628522	7.840212787973482e-5	0.3171366072735274	2.0342507943558956e-4
ENSMUSG00000022139	Mbnl2	0.06646199387758718	0.015507910198149746	4.285683436928644	3.0462948173959023e-5	0.1671197336823392	1.83055889483699e-4	-0.49080403975883263	0.12829197926830113	-3.825679848093998	1.792795675521478e-4	0.6965011199400941	4.375591819336545e-4
ENSMUSG00000045973	Slc25a51	-0.08594407928367721	0.014740611509003106	-5.830428353069698	3.0545000199933914e-5	0.16753932609663752	1.8338147930252295e-4	0.28130988413532787	0.12840799118322868	2.190750603160823	0.030323569496254924	1	0.048511813101229616
ENSMUSG00000025169	Ogfod3	-0.05695921344039378	0.01332678455276079	-4.27404023940599	3.069685228292857e-5	0.1683415379195803	1.8412514860680946e-4	0.6067448174261136	0.13092951146798593	4.63413336400076	6.748668685782563e-6	0.029977586302246145	2.0760280482678476e-5
ENSMUSG00000010392	Gosr1	-0.09084906469476382	0.01633044896455104	-5.5631700568657	3.1141306073204175e-5	0.1707477811993785	1.8662094167730736e-4	0.20371372214828098	0.13245269437735757	1.538011160179957	0.12592330622314554	1	0.17319718957949368
ENSMUSG00000021612	Slc6a18	0.06359516188153752	0.013370723093892955	4.756299374009507	3.1409625472682325e-5	0.1721875668412445	1.8805763021860754e-4	-0.8155586576676443	0.12426375516084467	-6.5631258013408695	5.334432841513156e-10	2.854988456777841e-6	2.856026696269859e-9
ENSMUSG00000032171	Pin1	0.05889156087526595	0.013801030309827012	4.267185822592699	3.156746089136578e-5	0.17302125314557584	1.888308115138062e-4	0.263061684328238	0.13558875729300993	1.9401437816835847	0.053882535360279225	1	0.08137412960078892
ENSMUSG00000021079	Timm9	-0.08928629569626047	0.017586012003580977	-5.077120138328088	3.181379564783953e-5	0.17433960015016065	1.901314944257803e-4	0.5394853155746421	0.12474969797279715	4.324542057747362	2.628308455260585e-5	0.1114139954184962	7.384402064737254e-5
ENSMUSG00000001911	Nfix	-0.08709590594548713	0.016395358951436893	-5.312229284120311	3.197062150134454e-5	0.1751670352058667	1.9089536250349096e-4	0.5652615842881468	0.12631076889524126	4.4751654133066	1.4723713408134226e-5	0.06381257391085374	4.311617010481674e-5
ENSMUSG00000029152	Ociad1	-0.06426648981881679	0.014917183348041568	-4.308218805077176	3.207187093689356e-5	0.1756897089923029	1.9132630169062522e-4	0.6520550803943287	0.126878901143745	5.139192367812167	7.077702349835202e-7	0.0033300589555974626	2.4824776898675708e-6
ENSMUSG00000040978	Gm11992	0.09279016551863419	0.017383430952176582	5.337851070591787	3.2124218804027935e-5	0.175944346389661	1.9146499975589113e-4	0.026656067099731232	0.13301557669303454	0.20039808691914723	0.8414262860534836	1	0.8732783852100823
ENSMUSG00000032637	Atxn2l	0.066714428296512	0.015630053165382865	4.26834301781326	3.2507012481059527e-5	0.17800840034628196	1.9357116934422776e-4	-0.3227722915395125	0.12913590397365177	-2.4994775396110542	0.01332550971138643	1	0.023104572832917707
ENSMUSG00000030718	Ppme1	0.06258301666270674	0.01408299857744185	4.44387012599378	3.320546870415196e-5	0.181799941155232	1.9755152267027112e-4	-0.7011880064152762	0.1269847183045909	-5.521829837298824	1.139974011694936e-7	5.585872657305187e-4	4.4622421159742294e-7
ENSMUSG00000000399	Ndufa9	-0.0936972780010626	0.01739818599733943	-5.385462485306859	3.349560969859078e-5	0.18335496749008592	1.9909766198439685e-4	0.14653367162598932	0.12472023491170882	1.1748989386503523	0.24183163396576687	1	0.30760722047066424
ENSMUSG00000020537	Drg2	0.06548389829948031	0.015137458188359772	4.325950729947209	3.368913813185229e-5	0.1843806529956276	2.0006726435702895e-4	0.33683279284841505	0.13066124700741305	2.5779089099716375	0.01073139798591021	1	0.018966585750010524
ENSMUSG00000027162	Lin7c	-0.08611293001908539	0.016606157651347684	-5.185602342640462	3.37643286720671e-5	0.18475840649355116	2.0033298707141707e-4	-0.4700416514729019	0.12244132423133668	-3.838913491206779	1.7606855156539658e-4	0.6852588026925235	4.3084085879520616e-4
ENSMUSG00000046707	Csnk2a2	-0.08884689677799198	0.01711229837671922	-5.191990860728889	3.40127748387405e-5	0.18608389114274926	2.016252778728941e-4	0.22520306551612357	0.12188737803451147	1.8476323729956605	0.06640819975567512	1	0.09817253524878507
ENSMUSG00000040564	Apoc1	0.0903135760857964	0.017820561505080414	5.067942222810946	3.4436752007426586e-5	0.18836903348062342	2.0395484087206743e-4	0.2564246654109217	0.12841685685799953	1.9968146837176548	0.04743395277356824	1	0.07250067578399048
ENSMUSG00000022947	Cbr3	0.03895977014809464	0.009177545558512181	4.24511868665794	3.453382719048447e-5	0.18886550090475956	2.0434584794369406e-4	-1.4915075258653947	0.09016515211857636	-16.541950973519242	2.546406518561161e-38	1.6666230663982797e-34	4.654265247814566e-36
ENSMUSG00000059734	Ndufs8	-0.09001776719539267	0.015534168676680454	-5.7948235962266414	3.466727334834785e-5	0.18956065066876604	2.0477606835987204e-4	0.1896335013788442	0.12642394920913502	1.4999808387977633	0.1362691980281873	1	0.18583447109336215
ENSMUSG00000021139	Gm20498	-0.0926130424779225	0.018442068448754068	-5.021835958112354	3.46795636316059e-5	0.18959317437398943	2.0477606835987204e-4	0.48323027971135113	0.1283916067606699	3.7637217253003383	2.285690307889075e-4	0.8774765091986159	5.484989870864373e-4
ENSMUSG00000042198	Chchd7	-0.06728441231645275	0.015810489304026645	-4.2556818465647765	3.469989608225795e-5	0.18966963198562195	2.0477606835987204e-4	-0.13454720270018586	0.13114161290189952	-1.0259687960436623	0.30627202034490636	1	0.3754928067578692
ENSMUSG00000028334	Nans	0.0662580623071146	0.014645584278523626	4.524098256993122	3.480270658825445e-5	0.19019679150481056	2.0513544498844895e-4	-0.26243677995006376	0.13466267540998306	-1.948845729903034	0.05284643308556661	1	0.07995620365670919
ENSMUSG00000066306	Numa1	-0.092615904353891	0.018467152100866586	-5.015169845790403	3.486693593040788e-5	0.19051293792374868	2.0513544498844895e-4	-0.1877926298765452	0.12652021611969974	-1.484289512269534	0.13962403486816724	1	0.18978024156838266
ENSMUSG00000057037	Cfhr1	0.056887138349867555	0.013408213456542046	4.242708287293231	3.4873557141575e-5	0.1905142426644242	2.0513544498844895e-4	0.513767451008549	0.13172951288987764	3.9001696714543	1.3439969400698304e-4	0.5296691940815201	3.349810555174047e-4
ENSMUSG00000053604	Rpia	0.05841461911082313	0.012892773479518171	4.530803182389132	3.488549588785325e-5	0.19054457853945445	2.0513544498844895e-4	-0.9454936624055302	0.11936724304463402	-7.9208804550507175	2.2259322337806442e-13	1.281914373434273e-9	1.7818289657270851e-12
ENSMUSG00000018861	Fdxr	0.05655652398535115	0.013331558727521039	4.242303930192239	3.4930861111442486e-5	0.1907574325295874	2.052188090297246e-4	-0.6108798005965893	0.1309764155329948	-4.664044271716232	5.927251214887246e-6	0.026453322172041778	1.841421765531543e-5
ENSMUSG00000027166	Dnajc24	0.08811527272218099	0.01660095156930764	5.307844695185502	3.515966463538347e-5	0.19197176890919376	2.06378762980217e-4	-0.2409161177408504	0.12641201890318515	-1.90580072868989	0.05853512847164693	1	0.08776715819859383
ENSMUSG00000020925	Ccdc43	0.06489256683995043	0.014710126497734292	4.411421400757187	3.533507213689838e-5	0.19289415879532829	2.0722350682779979e-4	-0.3876126729714775	0.13161409278300487	-2.9450696713044495	0.0036497256841952915	1	0.0070904030121065895
ENSMUSG00000039218	Srrm2	-0.08529641568427236	0.01635412210372211	-5.215591221791072	3.544528974912161e-5	0.19346039145070576	2.0752712443000647e-4	-0.27441997209127406	0.12575372701394846	-2.18220150294898	0.030652874758476088	1	0.048955319395818604
ENSMUSG00000021290	Atp5mpl	-0.09453115682632444	0.01858314365310962	-5.086930316577843	3.54679590763443e-5	0.19354865267961086	2.0752712443000647e-4	-0.09209077745938204	0.13100909210435455	-0.7029342466248653	0.4830825901588145	1	0.5500403950934417
ENSMUSG00000025645	Ccdc51	-0.09463018598507943	0.01846830638706724	-5.123923331234416	3.548146124373211e-5	0.19358685254580238	2.0752712443000647e-4	0.054557112131885487	0.13053669220688366	0.41794464996416153	0.6765233606311372	1	0.7301170596937645
ENSMUSG00000026712	Mrc1	0.08526302023645205	0.015523662935296658	5.492455008320667	3.618631150131775e-5	0.19739632923968833	2.1146174927057796e-4	-0.4009911435564919	0.12957320890694612	-3.0947072079110614	0.002313687423523994	1	0.004666401051021606
ENSMUSG00000020706	Ftsj3	-0.06499546676567061	0.014409194041453955	-4.510694115068789	3.631009615151815e-5	0.19803526441037997	2.1199683467345998e-4	0.3154139766427971	0.13288951347149527	2.3735053910815407	0.018657971903779918	1	0.0313027677528995
ENSMUSG00000032085	Tagln	0.08997338184509102	0.015973550218030055	5.632647759390023	3.636379765895987e-5	0.19829178863430816	2.1212215301059923e-4	9.568460033110016e-4	0.1301414073209341	0.007352356356124071	0.9941427183616152	1	0.995408333192336
ENSMUSG00000033487	Fndc3a	-0.0800652751049006	0.014502758084355397	-5.520693004682306	3.669944110750639e-5	0.20008535291812485	2.1370876218040926e-4	-0.6635898722855349	0.12126123448119443	-5.472399115221332	2.190376299593564e-7	0.00105838982796361	8.240523757190195e-7
ENSMUSG00000001964	Emd	-0.0922030421052833	0.014076632897591656	-6.55007790400346	3.670074487292743e-5	0.20008535291812485	2.1370876218040926e-4	-0.07797283574333622	0.12876867707545545	-0.6055264177145033	0.5458187594862305	1	0.6107971832345913
ENSMUSG00000066148	Prpf4	-0.087831910683127	0.017762317287159442	-4.944845273461114	3.6906939250505e-5	0.20114281891525224	2.1471941668286726e-4	-0.4439364305669354	0.12729190641291305	-3.487546404772052	6.122250228420362e-4	1	0.0013664995421643822
ENSMUSG00000012848	Rps5	-0.07880235239231095	0.016210548188294854	-4.861177517069518	3.697431154581615e-5	0.20147302361315222	2.1492135156490306e-4	1.0942525087474444	0.10679148081589475	10.246627356295418	1.3319763489713926e-19	8.250261505528806e-16	2.2647039731865022e-18
ENSMUSG00000005656	Snx6	0.08022419931326795	0.015049321060237588	5.330752064638418	3.7137137451640104e-5	0.20232312483653528	2.156772854649531e-4	0.493015114079028	0.12549098172061637	3.9286895944175457	1.3649758231614386e-4	0.5376639767432907	3.399523435428564e-4
ENSMUSG00000054452	Aes	0.05842100677787522	0.01382115760706055	4.226925735079585	3.717835294125774e-5	0.2025104884710309	2.1572624546161898e-4	0.2503639854042198	0.13578649870494056	1.8438061794954461	0.06681089531735941	1	0.09867916749455105
ENSMUSG00000025817	Nudt5	0.06593797403481413	0.015219823271864764	4.332374486680572	3.731479497964505e-5	0.20321637345914695	2.1632718146789815e-4	-0.32020158401411675	0.13316759371741624	-2.4045007878837974	0.017196953508121227	1	0.029066517873988614
ENSMUSG00000040738	Ints8	-0.0615174819033941	0.013736360273679653	-4.478441208423182	3.746248238483749e-5	0.20398321658544016	2.1699219550372424e-4	0.6866751079837502	0.12593238503990664	5.45272852385151	1.5938683815305567e-7	7.762139018053811e-4	6.129546435108746e-7
ENSMUSG00000040374	Pex2	-0.06040431975541762	0.013179246751395635	-4.583290752107742	3.844038928676631e-5	0.2092694792771558	2.2246065216088157e-4	0.7927740758558004	0.12496620446432462	6.343907772938096	1.7069345533309786e-9	8.993838161500927e-6	8.56069311045567e-9
ENSMUSG00000002107	Celf2	0.09041203174429993	0.017213713444748428	5.252325829316213	3.857665825380711e-5	0.2099727508754721	2.2302116862722148e-4	-0.23862173017909935	0.12779242872646412	-1.8672603107799293	0.06359638352068453	1	0.09452545822591014
ENSMUSG00000039109	F13a1	0.0655095996966624	0.014830465898296926	4.417231403646278	3.862930543183942e-5	0.21022068016007012	2.2302116862722148e-4	0.04238963323031029	0.1337264551007068	0.31698763867170093	0.7516155729867808	1	0.7970395600730086
ENSMUSG00000021213	Akr1c13	0.06034175088922242	0.013477956402967487	4.4770697489373665	3.863892587158549e-5	0.21023439566729663	2.2302116862722148e-4	0.7554324498746788	0.12348376933830774	6.117665940412178	5.647401405092505e-9	2.9208360067138437e-5	2.6373244319026746e-8
ENSMUSG00000038023	Atp6v0a2	-0.08308420105461697	0.014774526793124887	-5.623476285770385	3.908908604481512e-5	0.21264462808379425	2.2538225060928413e-4	0.537326018847432	0.1273094630564818	4.22062905574461	4.294093519471952e-5	0.17799017638211242	1.1598988242251825e-4
ENSMUSG00000015790	Surf1	-0.08879457464381588	0.01741297393695811	-5.099334264513779	3.9116493950729856e-5	0.2127546105980197	2.2538225060928413e-4	0.4610954403206639	0.1266785696843247	3.6398851160830574	3.6874096334659764e-4	1	8.546373859882396e-4
ENSMUSG00000021242	Npc2	0.08487995264980677	0.015373378721989553	5.521229534819005	3.956417844990761e-5	0.2151500024105976	2.2751156268462956e-4	-0.4660418934943889	0.12807228478391858	-3.638897317094694	3.7094983989707244e-4	1	8.59151688321977e-4
ENSMUSG00000026499	Acbd3	-0.0809791633825436	0.013586249237082309	-5.9603766992231435	3.9587479442963946e-5	0.21523712573139497	2.2751156268462956e-4	-0.8290911979070706	0.11788290114262275	-7.033176057518128	6.097367924169594e-11	3.3553815686705276e-7	3.719159608227388e-10
ENSMUSG00000031352	Hccs	-0.09218248500708276	0.01789139904751788	-5.152335195378221	3.9589778005152106e-05	0.21523712573139497	2.2751156268462956e-4	0.012478276377640282	0.13407066423233502	0.09307238424668582	0.9259513954232839	1	0.9417196498209771
ENSMUSG00000026739	Bmi1	-0.09239381869059622	0.01722746268604056	-5.363170443286641	3.974963533574295e-5	0.21603926804976292	2.2819652108463693e-4	-0.168121624037224	0.13129949847552833	-1.2804437639840536	0.20213952500702825	1	0.2628093409496633
ENSMUSG00000078650	G6pc	-0.09303589054902851	0.01763261040587163	-5.2763537790211545	3.977832973922166e-5	0.21615544380293053	2.2819652108463693e-4	0.1584994236590659	0.12556617352013832	1.2622780420528283	0.2086446314465565	1	0.2701459415423734
ENSMUSG00000077450	Rab11b	0.06128970575853581	0.01373262844709039	4.4630717269221405	3.981526912267152e-5	0.21631635714347436	2.2820946936165381e-4	-0.8889300404757654	0.12293384409269735	-7.2309626940932095	1.3009818472134181e-11	7.26598361668694e-8	8.593041343202888e-11
ENSMUSG00000027887	Sypl2	-0.05882705563804823	0.013975213088325339	-4.209385235577651	3.9910804331575684e-5	0.2167954891291191	2.2855795692059878e-4	0.007644940665790398	0.13730002275277892	0.05568054915442952	0.9556563828638884	1	0.9643028675424606
ENSMUSG00000042901	Aida	0.05039590741087533	0.011973516145134493	4.208948048343677	3.998130429445318e-5	0.21713846362317524	2.2876259326739298e-4	-1.0315263630641498	0.11763427353612746	-8.76892704869173	1.1620439732707507e-15	6.9071893771213425e-12	1.2003531152467096e-14
ENSMUSG00000019082	Slc25a22	-0.07931559363306516	0.014757350242153487	-5.374650078203397	4.017005711487341e-5	0.2181234101337626	2.2964289818928497e-4	0.8457930990651599	0.11462552054071765	7.378750343512853	1.2920736494281108e-11	7.217523405705427e-8	8.544567450489416e-11
ENSMUSG00000037278	Tmem97	-0.058295090419342874	0.013857296596600179	-4.206815522274763	4.032690264432758e-5	0.21893475445605445	2.303394265622183e-4	-0.19135410249471002	0.13614154760864555	-1.4055525727148281	0.1615341814913637	1	0.2158600556891091
ENSMUSG00000027828	Ssr3	-0.08314336042499397	0.014931229801038637	-5.568420118965044	4.0835266237693144e-5	0.2216538251381984	2.3304080819082473e-4	0.7375564563584974	0.121094868515184	6.090732542196994	1.1791265254058723e-8	6.0324113039764425e-5	5.296008557795658e-8
ENSMUSG00000003812	Dnase2a	0.08421838772106409	0.014944263501305637	5.63549938166616	4.0930555844985283e-05	0.22213012657073514	2.3338219883882423e-4	-0.19295128427845115	0.130361808895956	-1.4801212557003478	0.1411733932809983	1	0.19156958708784672
ENSMUSG00000038121	Fam210a	-0.09029391306034834	0.015804216536192347	-5.713279924605648	4.1093710778798375e-5	0.22297447468575998	2.3410962504285136e-4	0.35523420224767865	0.12865181359931974	2.761206331331166	0.006682416311721679	1	0.01230971425843467
ENSMUSG00000071379	Hpcal1	-0.080387110027598	0.01584578196850357	-5.073092018265952	4.125408447653659e-5	0.22380340828521098	2.3481996181281206e-4	-0.5996621058923934	0.1141421376694542	-5.253643554748932	4.7154044648322e-7	0.002244532525260127	1.7038638867982358e-6
ENSMUSG00000016664	Pacsin2	0.07905017688637521	0.014878294539137001	5.313120847180138	4.133622425069116e-5	0.22420768033574887	2.350841448310699e-4	-0.8374004815987457	0.11986225726897874	-6.986356678729687	1.0017497611376053e-10	5.477567693900425e-7	5.922294185341817e-10
ENSMUSG00000028433	Ubap2	0.06671315934692813	0.015829773410270642	4.214410251990305	4.146852347707672e-5	0.22488380281618706	2.3563288815126496e-4	0.3697374935220099	0.13152902604580788	2.811071477053595	0.005481598577280215	1	0.010290704319116637
ENSMUSG00000010097	Nxf1	-0.06572255585903494	0.015289112144259265	-4.298650911767454	4.1641414663571915e-5	0.22577975030588693	2.36411137606819e-4	-0.04478229648899474	0.1334340055694024	-0.33561382121368105	0.737548660852023	1	0.784905416206746
ENSMUSG00000037012	Hk1	0.07698506500918156	0.014442579301921426	5.330423562149979	4.193911995639324e-5	0.22735196928360776	2.378960425112651e-4	-1.0459404412308064	0.11103169323320326	-9.420197159688321	5.0485164276685064e-17	3.0513233288828453e-13	6.186077857366624e-16
ENSMUSG00000060073	Psma3	0.06590832470028572	0.015271993911924858	4.315633248702542	4.2081643392695585e-5	0.22808250718841008	2.3834482143039723e-4	-0.12704323829581993	0.13432502833783652	-0.9457897747566268	0.3455090833542126	1	0.4162609889255935
ENSMUSG00000015961	Adss	0.05851790053984598	0.013945460023688412	4.196197216903905	4.2090681231325465e-5	0.2280894015925527	2.3834482143039723e-4	-0.16695254410662794	0.13700771261583886	-1.2185631080109522	0.22456170021072067	1	0.28842787183028346
ENSMUSG00000066306	Numa1	-0.08848026274803185	0.017775573181290655	-4.977632048521512	4.23062948528832e-5	0.2292155055129212	2.3935977655371578e-4	-0.21600694675154095	0.12536886483263338	-1.7229712260688395	0.08679914481984623	1	0.12475718062791352
ENSMUSG00000063450	Syne2	-0.09301431232354856	0.019455348660905637	-4.780912125746442	4.254261378872101e-5	0.2304533388935017	2.404900332730105e-4	-0.10604753828130234	0.1292113756919095	-0.8207291170257422	0.4129245590149473	1	0.4833737054471363
ENSMUSG00000006369	Fbln1	0.06082100686942629	0.013600448920849342	4.471985242795062	4.2703178459115325e-5	0.2312804145345686	2.4118858393370007e-4	-0.8061525894852297	0.12441474621453597	-6.479558203616246	8.331158984399067e-10	4.435509043294064e-6	4.361099929780896e-9
ENSMUSG00000047866	Lonp2	-0.07434434049195682	0.012582865422793422	-5.908379212042166	4.277449961454662e-5	0.23162391541276994	2.4118858393370007e-4	1.001169388560291	0.11368388274751479	8.806607976117682	3.829791174904399e-15	2.2595767931935952e-11	3.700444336398083e-14
ENSMUSG00000042747	Krtcap2	-0.08521886519444179	0.015273446647141089	-5.579543842541474	4.2776151588241334e-5	0.23162391541276994	2.4118858393370007e-4	0.261080320123996	0.12787315311328615	2.041713321112041	0.04319248430610651	1	0.06668384484612408
ENSMUSG00000030220	Arhgdib	0.08263868972285594	0.01443353067700213	5.725466039610771	4.3062029888574196e-5	0.23309476778685212	2.4259259988597447e-4	-0.5538339537008204	0.12558569269956035	-4.410008352032279	2.004701668148296e-5	0.08594156051351745	5.750190486667737e-5
ENSMUSG00000029994	Anxa4	-0.05182490083966154	0.011642680844665352	-4.451285879180274	4.310165940687763e-5	0.23326618071002175	2.4260814276925137e-4	-1.1639741810760789	0.10590052412302918	-10.991203213723853	7.001862581869376e-22	4.402771191479464e-18	1.5724319381809045e-20
ENSMUSG00000024384	Iws1	0.0870869220869888	0.017194586485027398	5.064787231889633	4.323446121376299e-5	0.23394166962767152	2.4314765366372686e-4	-0.4037815797108254	0.12851986505272503	-3.141783408698529	0.001977359142368496	1	0.004036929307100435
ENSMUSG00000028455	Stoml2	-0.08537394859664597	0.015522285985666793	-5.500088625829976	4.3666805187439996e-5	0.23623741606405038	2.453694091659737e-4	0.20885093912655492	0.1318865071518874	1.58356562499628	0.11523845473916947	1	0.15973647191568044
ENSMUSG00000052160	Pld4	0.08567891629574631	0.014513860180363724	5.903248014726235	4.4104370520275265e-5	0.23856054014416891	2.4761668773328605e-4	0.045708102641239805	0.12906650419340943	0.3541438030485823	0.7238599222360589	1	0.7738421264521962
ENSMUSG00000062867	Impdh2	0.08772200881551093	0.016076161811762357	5.456651273025122	4.435039902098548e-5	0.23984695790548946	2.4878569953800886e-4	-0.3581586285305413	0.12892874013550476	-2.7779580266906727	0.006106673271593528	1	0.011341210874142086
ENSMUSG00000033009	Ogfod1	0.08156960439404026	0.014581772498711836	5.593943013529129	4.443068920421172e-5	0.24023673652717278	2.489063895959193e-4	-0.43330270438110247	0.129986469897922	-3.3334446632897548	0.001073090110838394	1	0.002293255254730962
ENSMUSG00000014301	Pam16	-0.061712599395633526	0.014669975083278596	-4.206728303579461	4.447786852719364e-5	0.2404473572580088	2.489063895959193e-4	0.7159314477610982	0.1232226016232269	5.81006599706582	2.7469807541432375e-8	1.382280715484877e-4	1.1668904688355393e-7
ENSMUSG00000047126	Cltc	0.08141927407490193	0.015168181759175527	5.367767565525765	4.448539728948345e-5	0.2404473572580088	2.489063895959193e-4	-0.48612713382062656	0.128850673315458	-3.772794672407092	2.371322436173025e-4	0.9079793608106512	5.669804371373002e-4
ENSMUSG00000025132	Arhgdia	0.07667586121516616	0.013930225114854804	5.504280123470593	4.512177881721195e-5	0.24383809272821338	2.5204761300600965e-4	-0.8092512393090164	0.12224699190704272	-6.619804926769695	5.305543326245481e-10	2.8400573425392057e-6	2.8428725640631322e-9
ENSMUSG00000022314	Rad21	-0.08696719482235248	0.01665958687895553	-5.220249184702764	4.512341764758045e-5	0.24383809272821338	2.5204761300600965e-4	-0.0341949114182628	0.1330605958137463	-0.25698751166068484	0.7975374405466729	1	0.8365688440613912
ENSMUSG00000025139	Tollip	0.07287282563863276	0.01332013246607423	5.47087844841157	4.5819919416620463e-5	0.24751920468858374	2.5572100912753406e-4	-1.0522003401633564	0.11162712714742379	-9.426027230582902	2.1806374874687624e-16	1.3066379824912825e-12	2.4360941710601795e-15
ENSMUSG00000057897	Camk2b	-0.09224871394792115	0.01958869204598509	-4.709283995652406	4.7412380359984034e-5	0.25607426632427377	2.6438429048194486e-4	-0.3986569657887656	0.12871183931833013	-3.0972827977604074	0.0022747494558184446	1	0.004595594540769224
ENSMUSG00000009013	Dynll1	-0.08837143095966117	0.016849930347605364	-5.2446169887117735	4.7892942538182886e-5	0.2586218897061876	2.668379016945329e-4	-0.46167739558991444	0.1278066927330031	-3.6123100106689248	4.006993487202151e-4	1	9.225338399506701e-4
ENSMUSG00000024097	Srsf7	-0.08007459996770067	0.014390744524575536	-5.564312522604699	4.837110537184853e-5	0.2611555979026102	2.692740045234884e-4	-0.4729314847278255	0.12862276076429702	-3.676887993365956	3.254151404375247e-4	1	7.62004136682887e-4
ENSMUSG00000028684	Urod	0.08087288280460549	0.014649488701217185	5.520525968792753	4.8528023573723066e-5	0.2619542712509571	2.696915979553709e-4	-0.18348881612892418	0.1321423367630832	-1.3885694821478722	0.16761841549898873	1	0.22285899656159747
ENSMUSG00000027896	Slc16a4	-0.07250195845315238	0.012669856519806165	-5.722397750899043	4.855765588979543e-5	0.26206566883722593	2.696915979553709e-4	-0.7466451264007292	0.12124591614870439	-6.158105362369417	7.2511517045167075e-9	3.733618012655653e-5	3.3318839536117275e-8
ENSMUSG00000001128	Cfp	0.05701100483613429	0.012711675265785186	4.484932445496419	4.8591555269186563e-5	0.2622000322325307	2.696915979553709e-4	-0.9669582121900588	0.11812282285377695	-8.186040502833619	4.520125676375149e-14	2.631617168785612e-10	3.918633326817982e-13
ENSMUSG00000042104	Uggt2	0.05631502241844914	0.013536187910521922	4.160331017174671	4.8610066136028854e-5	0.26225130680387565	2.696915979553709e-4	0.4646320948885034	0.1329868028740919	3.49382107733204	5.957485596724793e-4	1	0.0013333420145050727
ENSMUSG00000062591	Tubb4a	-0.0864549767216749	0.017056405734303823	-5.068768770421353	4.895060166276651e-5	0.26403954536896257	2.713292897760601e-4	0.3352109439047716	0.13135737399414343	2.551900465973969	0.011690603245993723	1	0.02046399823321061
ENSMUSG00000029625	Cpsf4	-0.09165681409846736	0.018568147531781938	-4.936239005080292	4.898771979543455e-5	0.26419077285677856	2.713292897760601e-4	-0.21845922409131133	0.1306192112634474	-1.672489230169201	0.096339084175939907	1	0.13653051343478023
ENSMUSG00000021592	Arsk	0.08340568516339489	0.015056548572241674	5.539495639602427	4.931300783928016e-5	0.26589573826939866	2.729012544848305e-4	-0.15561173075683046	0.1300391833170204	-1.1966526302881122	0.2335573831915667	1	0.2984671939018273
ENSMUSG00000030284	Creld1	-0.0535657076726274	0.012888150261328536	-4.156198258593685	4.94204954421392e-5	0.26642589092857244	2.7326626891535795e-4	0.7854419593736511	0.12662013186760557	6.203136482237373	3.5338482926359138e-9	1.8383078818292025e-5	1.6862017233897254e-8
ENSMUSG00000019849	Prep	0.0817099874538067	0.014605473209659067	5.594477240201247	4.9582474312741854e-5	0.26724953654567857	2.739317220636788e-4	-0.2803940638274257	0.1316602575455075	-2.1296788344083963	0.034803775731817664	1	0.05500018454358986
ENSMUSG00000058672	Tubb2a	-0.09060820757713131	0.018418562175236942	-4.919396352172951	4.9770072143969035e-05	0.2682109187838491	2.747374787813056e-4	-0.050251961816581495	0.1338398839596001	-0.37546327992745554	0.7078032165431052	1	0.759019746553721
ENSMUSG00000006095	Tbcb	0.0667925473637763	0.014159339971046013	4.717207687671761	5.0306327757402296e-5	0.2710504939568836	2.7746490917326667e-4	-0.13141245576821692	0.1354303243750064	-0.9703325778378554	0.33316518882519686	1	0.40350210610524484
ENSMUSG00000024601	Isoc1	0.0764051528510491	0.013121515310763023	5.822890957447361	5.0368744386972455e-5	0.2713364260126206	2.7757649754294703e-4	-0.641793246592294	0.12584117637305772	-5.10002580307808	1.0957916265564897e-6	0.005094335271861121	3.7320439455184795e-6
ENSMUSG00000034807	Colgalt1	0.0802194577952864	0.014632727141911219	5.482194605100026	5.044876730373573e-5	0.2717170606979206	2.7778484423312226e-4	-0.5863928663801177	0.12537729309046164	-4.677026054127889	6.662065357814716e-6	0.02961288051548641	2.052265451985994e-5
ENSMUSG00000034021	Pds5b	-0.08926823314319375	0.01865136378300353	-4.786150448930786	5.113408650160307e-5	0.2753570558111325	2.813229842646724e-4	-0.3734427189901672	0.12720293301083913	-2.9358027378059406	0.0037780407198852945	1	0.007322388199365313
ENSMUSG00000028176	Lrrc7	-0.07574196660860763	0.014296944188496979	-5.297773119205993	5.1466370819273886e-5	0.2770949404909706	2.8291455304162253e-4	-0.7932160308127275	0.11966388386652231	-6.6287003662484425	9.968570742276436e-10	5.293311064148787e-6	5.160754955482214e-9
ENSMUSG00000041841	Rpl37	0.056712371235663785	0.01368423567133226	4.144357974956041	5.1814466057172234e-5	0.2789172707857581	2.8459030605692263e-4	0.37944871873777924	0.13444130383942876	2.822411773029049	0.005287767562191122	1	0.009952377162247592
ENSMUSG00000031788	Kifc3	-0.08647606065629432	0.01673854020869676	-5.166284489454127	5.198806574060178e-5	0.2797997698159188	2.8530564851806485e-4	0.40164154691235643	0.13044285975838368	3.0790611893691064	0.0024824638115940826	1	0.004975513822811167
ENSMUSG00000018326	Ywhab	0.07837590249573216	0.014580712793394105	5.37531351219269	5.2187457735222434e-5	0.2808207100732319	2.861612265814697e-4	-0.6782590252548583	0.12589460556757304	-5.387514597603688	2.4973219219681844e-7	0.0012042086307730586	9.34188643919878e-7
ENSMUSG00000022108	Itm2b	-0.08797124217652387	0.017397158009181807	-5.056644431814365	5.2742111173913714e-5	0.2837525581156558	2.8896177479130074e-4	-0.26697310492865006	0.13170126062286905	-2.027111233909419	0.044251310190705516	1	0.06814266816167618
ENSMUSG00000021087	Rtn1	-0.07970683774697453	0.013887932763459614	-5.739287416244577	5.289163546315906e-5	0.2845041071563326	2.8953990128750964e-4	-0.05238694158119714	0.13209286007369947	-0.3965917730297348	0.6924112664674897	1	0.7446986161091995
ENSMUSG00000042770	Hebp1	0.06939404201207929	0.012022637147975575	5.771948463383856	5.2942201474192583e-5	0.2847231595282077	2.895757985870218e-4	-0.954210440907143	0.11675123026211498	-8.17302257770536	1.8217969232549756e-13	1.051905543487423e-9	1.4854304529142182e-12
ENSMUSG00000021335	Slc17a1	0.05594724665191916	0.013496029708715832	4.145459654389174	5.3149765291068576e-5	0.2857862879700757	2.904696475209562e-4	1.0485346582858794	0.11139508702109968	9.412754963666156	2.220982098815504e-17	1.3459151518821953e-13	2.8050023436096e-16
ENSMUSG00000054008	Ndst1	-0.08196450533275143	0.015522027130206851	-5.280528415856412	5.347300289505743e-5	0.2874708635638287	2.9199365896222235e-4	-0.5411409072082309	0.125411571817765	-4.314920061719348	3.129371099630881e-5	0.13162134845047485	8.670004983398399e-5
ENSMUSG00000042797	Aqp11	-0.06269964109528899	0.01474172302150004	-4.253209818407577	5.5181915124732895e-5	0.2966027937954393	3.0107545731404843e-4	0.5190841456523574	0.13001673612078984	3.9924409821371847	9.475643512154375e-5	0.3804470870129982	2.4298415553381054e-4
ENSMUSG00000022681	Ntan1	0.085130032052419	0.01624313881642105	5.240984086545916	5.593991721351812e-5	0.30062111510544637	3.0495828936615515e-4	-0.20301751130212342	0.1314161310416825	-1.5448446830148304	0.1242541565971088	1	0.17115184224596522
ENSMUSG00000060429	Sntb1	-0.0839320336459109	0.0181367934917417	-4.62772174608086	5.628499188632202e-5	0.3024192614052082	3.0658546904966793e-4	-0.8783750153481534	0.11687367908581274	-7.51559309349045	2.567808121342397e-12	1.453636177491931e-8	1.8365410259166275e-11
ENSMUSG00000063882	Uqcrh	-0.08226185993379402	0.01656641350038529	-4.965580506117442	5.634463728870084e-5	0.3026833915149009	3.0665650401956294e-4	0.45059016364445764	0.12521298880425147	3.5985896347293194	4.315818653625535e-4	1	9.88103226891302e-4
ENSMUSG00000021264	Yy1	0.09295696829167042	0.018870080001118082	4.926156555041769	5.687718400109328e-5	0.305487355269872	3.0929906671668905e-4	-0.17916339805938955	0.1335379170157025	-1.341666861842109	0.18148523500689112	1	0.2390257899009895
ENSMUSG00000042043	Tbca	0.08663188924036956	0.01721442274574917	5.032517820660698	5.710773581838621e-5	0.3066685413447339	3.102963680305378e-4	-0.2224059965615737	0.13353165657375338	-1.6655675685318294	0.09759506546739466	1	0.13804289139627188
ENSMUSG00000057177	Gsk3a	0.056018360235195595	0.013606824030375969	4.116931336081059	5.7792599977650846e-5	0.3102884692800074	3.1375850482916054e-4	-0.4895857881094904	0.13368077017189509	-3.66235014564885	3.2611075430787306e-4	1	7.633613530223425e-4
ENSMUSG00000037712	Fermt2	0.06152492202517752	0.014041441714366346	4.38166701658769	5.8119428652074594e-5	0.3119850930043364	3.152727456971565e-4	-0.5872441289478451	0.12967154715199103	-4.528704575873708	1.0686045031917916e-5	0.0468506784297642	3.200463191170682e-5
ENSMUSG00000038387	Rras	0.06366134527204999	0.012004925762646498	5.302935355929747	5.832856955208824e-5	0.31304943278605757	3.1614661256403677e-4	-1.3020500706576288	0.10048629847237477	-12.957488637275086	3.245513537381704e-26	2.0745322530943853e-22	1.1299195278291859e-24
ENSMUSG00000071337	Tia1	0.08778252125842774	0.01686298572582096	5.205633372743315	5.844467784315765e-5	0.313614141306384	3.1638702227079296e-4	-0.1904799717668595	0.1291705497894328	-1.4746393204749084	0.1422110146444057	1	0.19277883732183548
ENSMUSG00000062373	Tmem65	-0.07894781224935152	0.015810616025139695	-4.993341949726717	5.846909104578788e-5	0.313686673460652	3.1638702227079296e-4	-0.9312007628147827	0.11590849383241378	-8.033930318869976	1.4212351961323543e-13	8.214739433645008e-10	1.1675065656118466e-12
ENSMUSG00000026222	Sp100	-0.07703799333501636	0.013573964667365393	-5.675423151809992	5.870919959321008e-5	0.31491614661797884	3.174252533470192e-4	0.06398196941822011	0.1321104794593539	0.48430654161621817	0.6289427733849164	1	0.6875781094913302
ENSMUSG00000034064	Poglut1	0.060578181202144255	0.01446470208289493	4.188000613837757	5.909168529211006e-5	0.31690870822158623	3.1909345769852627e-4	-0.7257851310800081	0.1254568903625281	-5.785135666783496	3.106287893636347e-8	1.5596671513948098e-4	1.3102163038543054e-7
ENSMUSG00000028238	Atp6v0d2	-0.06005914095943951	0.014504344012431215	-4.140769200452273	5.9199236078957585e-5	0.3174263038553706	3.1909345769852627e-4	-0.693023401477937	0.12243595020150864	-5.660293405142353	5.803861648109003e-8	2.882778080615742e-4	2.3661344265524933e-7
ENSMUSG00000031715	Smarca5	-0.0851968415115908	0.017140504533996726	-4.970497883688905	5.923174046395431e-5	0.317541360627259	3.1909345769852627e-4	-0.1855564784996798	0.13195758692127493	-1.4061827199854877	0.16143985494903976	1	0.2157778276588831
ENSMUSG00000029014	Dnajc2	0.04118013421123266	0.009190704763384015	4.480628555853006	5.928868841813903e-5	0.3177873699212252	3.1909345769852627e-4	1.4748961734171904	0.08725772730912584	16.90275714140607	3.181186263782581e-39	2.0846313586567254e-35	7.4757877198890655e-37
ENSMUSG00000031333	Abcb7	-0.08749271359064485	0.01713423527884749	-5.106309804129753	5.929475236687519e-5	0.3177873699212252	3.1909345769852627e-4	0.14211191238618961	0.1309202006921224	1.0854849873044887	0.2794441210991571	1	0.3474569759698515
ENSMUSG00000031555	Adam9	0.06183713644784753	0.013386177176832796	4.619476914952829	5.9308708019042194e-5	0.3177873699212252	3.1909345769852627e-4	-0.6010156652100599	0.13002165255672135	-4.622427521815027	7.141502878754101e-6	0.03168684827303195	2.1917485514086746e-5
ENSMUSG00000014873	Surf2	0.0555946779213301	0.01353729186730849	4.10677988376589	6.016795286125238e-5	0.322319723477729	3.234519034534646e-4	-0.5079105892446351	0.1329976487403378	-3.8189441246158458	1.8277709237074277e-4	0.7095406725832234	4.455995805111105e-4
ENSMUSG00000030545	Pex11a	-0.054755576599097765	0.01333515183859146	-4.106108221477993	6.032835981464156e-5	0.3231186951672202	3.240494755757889e-4	0.6248812527925984	0.13101171619199756	4.769659317162409	3.730501157920882e-6	0.01683202122453902	1.1861560029801017e-5
ENSMUSG00000042684	Npl	0.05452386052671644	0.013294386753647613	4.101269320433799	6.149611276856382e-5	0.3293116838756593	3.300525465066476e-4	-0.6427273700306201	0.1306112180346575	-4.9209201146878	1.8977891353268234e-6	0.008705158763744138	6.262513796615094e-6
ENSMUSG00000027848	Olfml3	0.08214748173087302	0.014857742994126998	5.528934089339442	6.155416282741092e-5	0.3295609877779581	3.3009485852026395e-4	0.02824188562372271	0.13323658679982334	0.21196794590778392	0.8324151273712271	1	0.8663858807501859
ENSMUSG00000039474	Wfs1	-0.08348639600877616	0.016671370705011557	-5.007770355899976	6.169465848704212e-5	0.33025150688113647	3.305788703947371e-4	-0.3987586909280327	0.13036260446112707	-3.058842622670513	0.002574048411277575	1	0.0051402848395163715
ENSMUSG00000053436	Mapk14	0.08237077974578595	0.014258304403346658	5.777038939248077	6.192809059356048e-5	0.3314391408567357	3.314361230161687e-4	0.02465851733276411	0.13066476138790714	0.18871589455981835	0.8506086999388071	1	0.8812793647610376
ENSMUSG00000006574	Slc4a1	-0.08363550871909928	0.016330121082194345	-5.121548597106963	6.195538469755129e-5	0.33152326351659694	3.314361230161687e-4	0.4030561607586293	0.1324994993682068	3.0419447822860417	0.0028166157469425557	1	0.005585693675371313
ENSMUSG00000001280	Sp1	-0.0881199639339741	0.018305478413283987	-4.813857466299645	6.212462262484758e-5	0.33236673104293457	3.3184756354891556e-4	-0.033220302824567054	0.12768781379733432	-0.26016815416147865	0.7950540061841238	1	0.83489552516622
ENSMUSG00000010045	Tmem115	-0.08176164146659853	0.01416256574144162	-5.773081160523951	6.213316083469057e-5	0.33236673104293457	3.3184756354891556e-4	0.2860937771306638	0.12968699606549852	2.2060328777001814	0.02904708845083158	1	0.0466511696378989
ENSMUSG00000039783	Kmo	-0.06402865335736099	0.0155569995512011	-4.115745658192654	6.231937847118436e-5	0.33328403606389395	3.325721900570909e-4	0.06389747684709636	0.1300270107775867	0.491416948409235	0.6237251458647033	1	0.6827668374296701
ENSMUSG00000024411	Aqp4	-0.06409934457833595	0.014717478412388695	-4.355321121067805	6.282769858606549e-5	0.33593970433969217	3.350131739840445e-4	-0.20886380992090336	0.13520342510155856	-1.544811529471347	0.12412447141395737	1	0.17106787642945728
ENSMUSG00000044857	Lemd2	-0.08037779795119711	0.013847462265385274	-5.804514676463051	6.352752633365552e-5	0.33961815577972243	3.384705451623104e-4	0.5205715228554195	0.12853096001000433	4.050164433650075	8.369668539121582e-5	0.33788351892433827	2.164796343845126e-4
ENSMUSG00000028970	Abcb1b	0.044534285394315185	0.010886663364200182	4.090719433904992	6.411731429830062e-5	0.34270704492441684	3.413365113938658e-4	-1.2516264572429978	0.10695644625663776	-11.702206842584967	4.94655040069039e-24	3.136112954037707e-20	1.3505519351262559e-22
ENSMUSG00000028307	Aldob	0.07916572289909196	0.014445831764665686	5.480177548012866	6.46522579904608e-5	0.3455016667010225	3.439061096016427e-4	0.2503240370444743	0.13137241979929404	1.9054534995009622	0.05862539356828528	1	0.08787131883355744
ENSMUSG00000026307	Scly	0.06179475927926026	0.014504736946200053	4.2603157512242396	6.489329306202632e-5	0.34672486483040665	3.4490942516004293e-4	-0.5671892515147344	0.13029992804564783	-4.352951379344059	2.2349770649380657e-5	0.09541117090220602	6.360791127721657e-5
ENSMUSG00000036833	Pnpla7	-0.0823283996726443	0.016051646634722395	-5.1289691049237405	6.56457749017785e-5	0.35067972952530074	3.4862727913938864e-4	-0.1982693384210042	0.13181201201897405	-1.5041826263335072	0.13441133301360375	1	0.1836815308887877
ENSMUSG00000036169	Sostdc1	-0.06115564417028729	0.014363047807466047	-4.257845896641659	6.595284943062638e-5	0.3522541688089755	3.4997560423671094e-4	-0.5243024853446492	0.12941274191901705	-4.051397702961454	7.524280560094318e-5	0.3051095767118246	1.9600065750364457e-4
ENSMUSG00000040809	Chil3	0.05529334434857796	0.013542746915718384	4.08287511334955	6.613504322578163e-5	0.3531611308256739	3.5056262672095785e-4	-0.11507749725076272	0.13305124207491256	-0.864911108353051	0.3882077144118071	1	0.4590662177336554
ENSMUSG00000073418	C4b	0.05332092668508654	0.013060080228129635	4.082741128208426	6.617002771845435e-5	0.35328177798882776	3.5056262672095785e-4	0.6802537658124219	0.12830926449152208	5.301673020324803	3.2469116593324366e-7	0.0015575435229817699	1.1975716770407754e-6
ENSMUSG00000033323	Ctdp1	0.06439972449351059	0.01563692760097595	4.118438489763884	6.66597801855059e-5	0.35582990663023045	3.528731726634182e-4	-0.09764904593196182	0.13283451432903515	-0.735118025802256	0.46321465265067374	1	0.5308172090632938
ENSMUSG00000057561	Eif1a	0.06486474537081675	0.015543606813750254	4.173081971774776	6.686149242437857e-5	0.35683978506890845	3.536564470678545e-4	0.014176420300568595	0.1358132243801007	0.10438173723711192	0.9169813154971184	1	0.9344917780264638
ENSMUSG00000025194	Abcc2	0.07587108590595322	0.014987406986384564	5.062322386712988	6.708829600535947e-5	0.35798314748459814	3.545710744700926e-4	0.8678891269878654	0.11750768423227355	7.385807427472893	9.405127467515614e-12	5.272514458289253e-8	6.347255255000281e-11
ENSMUSG00000024978	Gpam	-0.07753090525740156	0.015210164235091026	-5.097308882341438	6.728897265189454e-5	0.35898666909785737	3.553462600718026e-4	0.7999676355192766	0.12249886911512799	6.530408331912386	9.18962558830304e-10	4.885204962741896e-6	4.780058211148933e-9
ENSMUSG00000073421	H2-Ab1	0.06329274417181123	0.014136671053166435	4.4772028671937205	6.753246131711536e-5	0.3602181486654933	3.5634610703016767e-4	-0.014396732804714863	0.1360060648576018	-0.10585360895330827	0.9158143002067576	1	0.9338382295615163
ENSMUSG00000025812	Pard3	-0.08639332328613997	0.017868162225132104	-4.835042473737181	6.784157351448333e-5	0.3617991115527396	3.576903475362984e-4	-0.29057171178274066	0.12572174527264365	-2.311228746885424	0.022000813713220945	1	0.036364067880681694
ENSMUSG00000034116	Vav1	0.06306555143662759	0.014333914756886085	4.3997437201397185	6.881687067610794e-5	0.3669315544450075	3.6230489033671763e-4	0.029887498605302334	0.13552295073201065	0.22053459169733736	0.8257006082465792	1	0.8603499607699907
ENSMUSG00000039361	Picalm	0.08314923428456468	0.01641651114444101	5.064975959445611	6.882691685727918e-5	0.3669315544450075	3.6230489033671763e-4	-0.11795447628577303	0.13359688459377947	-0.8829133751466628	0.37853418317427934	1	0.4494590625144538
ENSMUSG00000028961	Pgd	0.07633028555814692	0.014408324742938223	5.297651664573825	6.89085433872584e-5	0.3672825362540873	3.624446166971705e-4	0.5951008102634749	0.1267030130896884	4.696816561435875	5.708242757228324e-6	0.02551013688205338	1.778124355809907e-5
ENSMUSG00000029462	Vps29	0.08561660336055614	0.016154127318784395	5.299983197544764	6.987030932262634e-5	0.3723388783802758	3.672097726380841e-4	0.2938788160890389	0.13282983307169474	2.212445873739961	0.028304200766690903	1	0.04566738775378696
ENSMUSG00000021820	Camk2g	-0.0845937314806252	0.016256594725266565	-5.203656295198568	7.000379485031914e-5	0.37298021896250033	3.676176936273742e-4	-0.004781750395897454	0.13395203004350142	-0.03569748360173834	0.9715723445495793	1	0.9769171801858545
ENSMUSG00000002455	Prpf6	-0.08502922103795837	0.017961782217576088	-4.733896670607385	7.037033921018466e-5	0.3748627969726537	3.692478724106978e-4	-0.39887075775313274	0.13013911424299796	-3.0649567585680235	0.0025123309222423265	1	0.00502629556521444
ENSMUSG00000037003	Tns2	-0.08711015064293283	0.01963064198130628	-4.437458068151079	7.134548800915993e-5	0.3799860691367858	3.740663833468305e-4	-0.618372920698435	0.12119219481706732	-5.102415395907578	8.400548679221311e-7	0.003928096562403885	2.901606840381954e-6
ENSMUSG00000034101	Ctnnd1	-0.07286897385163796	0.014494664099914853	-5.027296482991008	7.140627826519023e-5	0.38023843176213795	3.740870310389743e-4	-0.9262442708612355	0.11669487650398126	-7.93731737510888	4.719572676060617e-13	2.70714688698837e-9	3.675122864908741e-12
ENSMUSG00000018909	Arrb1	0.06723666901177752	0.011957568246606608	5.622938345416373	7.157329310953316e-5	0.38105621251515454	3.744891451319481e-4	-1.108341185891788	0.11055425722790299	-10.025314390263496	6.274509794142312e-18	3.8274509744268106e-14	8.579442617432635e-17
ENSMUSG00000050965	Prkca	-0.08327220770874343	0.016188385946091795	-5.143947518056735	7.159686087781014e-5	0.38111009045258337	3.744891451319481e-4	-0.35807373067979653	0.12634980422993702	-2.8339872219204865	0.005195524799866695	1	0.009792417222742678
ENSMUSG00000003814	Calr	0.08245008059565152	0.01683516244135157	4.897492428889936	7.190067835058832e-5	0.382655410181831	3.75494648585661e-4	0.48974037173166823	0.1293420787179004	3.7863963265953773	2.0972353258924333e-4	0.8091133887293008	5.067869425035699e-4
ENSMUSG00000044533	Rps2	-0.08316143735006748	0.017189936639351196	-4.837797782203243	7.190323058023296e-5	0.382655410181831	3.75494648585661e-4	0.6371902894457978	0.12416466292750752	5.131816689405551	7.971038991152759e-7	0.0037336346634559525	2.764862233093577e-6
ENSMUSG00000028085	Gatb	0.07878833777218099	0.01360554138031415	5.7909006021752125	7.199021107190761e-5	0.3829879229025485	3.7565074453065197e-4	0.3116692823303102	0.1301131071964039	2.39537191176174	0.01796394984812295	1	0.030230892583286192
ENSMUSG00000015291	Gdi1	0.08849509365068554	0.016018552005880295	5.524537649732612	7.217954660234431e-5	0.38392300837786936	3.7630468434770973e-4	-0.19247476097641666	0.13083576405399094	-1.4711173383524527	0.14322857845743509	1	0.19403830476630077
ENSMUSG00000024069	Slc30a6	-0.07653508998918303	0.01388191744346953	-5.513293844373597	7.222991129652848e-5	0.38411866827493846	3.7630468434770973e-4	0.2983216067268381	0.1310795279124687	2.275882523211779	0.02433820626519203	1	0.03991659950771774
ENSMUSG00000047250	Ptgs1	0.04781015725910146	0.01177985256133379	4.058638001636252	7.275913084972331e-5	0.38686029872797884	3.7867405436689164e-4	-1.0829518553670388	0.11573161814946765	-9.357441576323627	2.7698227882665295e-17	1.6771276982953836e-13	3.464911396728853e-16
ENSMUSG00000027303	Ptpra	-0.06483716654108898	0.011521728174725028	-5.627382069585785	7.285159802046915e-5	0.38727909507681396	3.7867405436689164e-4	-1.0860780846041325	0.10927199107353126	-9.939217487794188	5.9895969320903035e-18	3.654253088268294e-14	8.210739127740458e-17
ENSMUSG00000030304	Ergic2	-0.07375376120077182	0.014025917112793095	-5.258391348505882	7.285734845417704e-5	0.38727909507681396	3.7867405436689164e-4	0.8417148976041275	0.12191410523351708	6.904163353304259	1.133014081950056e-10	6.183990859283405e-7	6.638675564765244e-10
ENSMUSG00000029672	Fam3c	-0.07984986246267414	0.017530395734501873	-4.554937816122442	7.318250966181715e-5	0.38889185634289636	3.80063862332089e-4	-0.8609945601033642	0.11413886106436866	-7.54339540516184	2.3611709883029984e-12	1.3373672477748182e-8	1.6928407058855262e-11
ENSMUSG00000021610	Clptm1l	-0.08371153529404393	0.015764606245721135	-5.310093635657098	7.345133137984786e-5	0.3902469236211317	3.8115911709731774e-4	0.2662312491963659	0.1302636623762158	2.0437875332221256	0.042742745785248934	1	0.06611360302466808
ENSMUSG00000030987	Stim1	-0.0670616565566887	0.013295973698911901	-5.043756709760701	7.404843621088148e-5	0.39334529315220246	3.8395485442679287e-4	-1.008355353536366	0.11328798731585049	-8.900814441385029	5.1083103360777334e-15	3.0082839569161775e-11	4.857323990085474e-14
ENSMUSG00000073702	Rpl31	-0.05074715511242645	0.012484903613250914	-4.064681369150957	7.440721103607638e-5	0.3951766978126017	3.855113768640808e-4	1.1921571442024992	0.10373628876722064	11.492190036580581	2.560344102468495e-23	1.6186495415805825e-19	6.504657990055096e-22
ENSMUSG00000027007	Ssfa2	-0.08685896698247539	0.0176439132020932	-4.922885642634583	7.470874543851996e-5	0.396703438278541	3.8676911485874217e-4	-0.30379390400469125	0.1296200310155325	-2.343726518382698	0.020260133923097817	1	0.033724179411582
ENSMUSG00000023960	Enpp5	0.07898169018344962	0.014672929486084337	5.3828167209796165	7.491577027755501e-5	0.39772782440353954	3.875359814672264e-4	-0.22236316934153832	0.1327728041725372	-1.674764427303796	0.09603973053045511	1	0.13625300277930028
ENSMUSG00000059040	Eno1b	0.08173132733514009	0.016407235854622428	4.981419665038449	7.500884540543343e-5	0.39814695141204065	3.877126494640628e-4	-0.36610579618205435	0.13144856896658916	-2.7851638025447736	0.005952685448649912	1	0.011080683871308535
ENSMUSG00000038528	Mfsd4b5	-0.09125050840331202	0.01956916335576206	-4.6629744330098655	7.569030499064511e-5	0.40168844858535363	3.909279488527825e-4	0.3026003116406938	0.13347379674017631	2.26711398814663	0.02457975056349302	1	0.04027259927982672
ENSMUSG00000024781	Lipa	0.08257449374968515	0.013323862626307062	6.197489126512563	7.586505126248232e-5	0.40253996199873116	3.91523166515399e-4	0.91057611382078	0.11299143376370346	8.058806614712475	1.8027222425513906e-12	1.0234054170964245e-8	1.3121584464588662e-11
ENSMUSG00000024066	Xdh	0.057074508098943474	0.013649965598506566	4.181293182540179	7.60204649004443e-5	0.403288566296857	3.9201775787219706e-4	-0.8846208207800422	0.12170611373704451	-7.268499450170055	1.0287058119417038e-11	5.7566377236257744e-8	6.871963698047118e-11
ENSMUSG00000054414	Slc30a7	-0.08366230840659006	0.01669645779510267	-5.010781893578021	7.661676116214335e-5	0.40637530120400833	3.9478331123484985e-4	0.162538552905591	0.13342706194690604	1.2181828073998147	0.22500281870062194	1	0.28888166771709123
ENSMUSG00000037149	Ddx1	-0.06098261474084791	0.013683551529060414	-4.456636466880416	7.712223016060738e-5	0.40897918654170096	3.9676367434901436e-4	0.4820471045934577	0.13258839970540712	3.635665757068484	3.6008392410202014e-4	1	8.369311976655925e-4
ENSMUSG00000034926	Dhcr24	-0.06108503153644364	0.014616106973836113	-4.179295598054273	7.715058959879145e-5	0.4090524260527923	3.9676367434901436e-4	0.604884185151809	0.1302339637718568	4.644596291420893	6.5053734227504635e-6	0.028948911731239563	2.0086981286578155e-5
ENSMUSG00000025006	Sorbs1	-0.07301520565898006	0.014201033413253886	-5.141541712790751	7.71819913627262e-5	0.40914173621381156	3.9676367434901436e-4	-0.7422912312424461	0.11574134294726543	-6.413362868794879	2.3242009442166276e-9	1.2176488746750912e-5	1.1395858578945909e-8
ENSMUSG00000060216	Arrb2	0.06047088608745505	0.013695279827076415	4.415454583695352	7.802336192509179e-5	0.4135238182029865	4.0077573885019833e-4	-0.533638494338916	0.1307768707554399	-4.080526558376289	6.701380847530846e-5	0.2732823109623079	1.7616894117759873e-4
ENSMUSG00000074513	Arfip1	0.07793446531201242	0.015230641654155724	5.1169521994989475	7.932521675215067e-5	0.4203443235696464	4.071450282598685e-4	-0.35807017097945204	0.13150247847823646	-2.7229157588745547	0.007348876297806197	1	0.013420928681533382
ENSMUSG00000029119	Man2b2	0.07780123717943173	0.01490333022695607	5.220392757499962	7.953726261551058e-5	0.421388417336975	4.079151894076848e-4	-0.7390760050034905	0.12315789632322782	-6.001044407772166	1.2032663867945919e-8	6.151097769293953e-5	5.3897160143692404e-8
ENSMUSG00000027835	Pdcd10	0.057795910176697295	0.013103271315619837	4.4108000807249805	8.015045275441183e-5	0.4245569482401194	4.1073985913086435e-4	-0.7896549760956977	0.12559076198477825	-6.287524365776241	2.301888837856643e-9	1.206189751036881e-5	1.1294875878521037e-8
ENSMUSG00000039959	Hip1	0.0767170545204978	0.01470546624698139	5.216907320857345	8.045986024964106e-5	0.42611541988209906	4.1171638914649824e-4	-0.7581826295601207	0.1221027116537137	-6.209384044724128	6.219884762149624e-9	3.208838548792991e-5	2.8781182654672658e-8
ENSMUSG00000020282	Rhbdf1	-0.06340083382247833	0.015503055731702799	-4.089570141506201	8.04661514350147e-5	0.42611541988209906	4.1171638914649824e-4	-0.2676403399071377	0.1333503376672066	-2.0070465856267234	0.046224823881809256	1	0.0708005915135719
ENSMUSG00000035027	Map2k2	0.0779257530279947	0.01378274896740144	5.653861447545947	8.18357451061293e-5	0.43323843459184846	4.1839875897306197e-4	-0.32179179295711025	0.1312605226868982	-2.4515504461664768	0.015474876056466136	1	0.026413666524396154
ENSMUSG00000026277	Stk25	0.055903239687685076	0.013878660021772564	4.027999792486104	8.20407669093349e-5	0.4342417792511096	4.1912130921073265e-4	-0.3126013618349952	0.13635143340743142	-2.292615149126535	0.022995472473155736	1	0.03788437878652097
ENSMUSG00000036905	C1qb	0.08299966412094122	0.015471992226898768	5.364510458882115	8.210980324717659e-5	0.4345250787840585	4.1914856894214274e-4	0.004397963092984841	0.13203048852431265	0.033310208438522754	0.9734688812398433	1	0.9783756283119245
ENSMUSG00000032046	Abhd12	-0.08073739766812288	0.016738304228232012	-4.823511185317415	8.25635687265989e-5	0.43684384213243477	4.211382032721091e-4	-0.4274691529306806	0.1288553407234983	-3.317434500817136	0.0011367173455814033	1	0.0024166720949678946
ENSMUSG00000031166	Wdr13	0.07930755252829756	0.015305282687535195	5.181711056724655	8.343817094947735e-5	0.44138792432273516	4.2526968617161967e-4	-0.535953463191524	0.12923797417072272	-4.147027734151359	5.955067502496753e-5	0.24386001422724204	1.576200489397773e-4
ENSMUSG00000020576	Nbas	-0.08358161607308541	0.017508843063694123	-4.773680120898339	8.481413064861754e-5	0.44858193700053817	4.3194812667794383e-4	-0.10890778557644501	0.13082458749792605	-0.832471843858644	0.4062611354268695	1	0.4771864104085686
ENSMUSG00000058454	Dhcr7	-0.08098668634062654	0.015835110794333664	-5.114374467755938	8.489073776344351e-5	0.4489022212930893	4.3200390911327016e-4	0.5151683859402945	0.1275054542433788	4.040363520112289	8.350221398774141e-5	0.33718194008249985	2.1606156824197347e-4
ENSMUSG00000026849	Tor1a	-0.05582891671344931	0.013853443972073502	-4.029966615232441	8.498258712974018e-5	0.4493029381549363	4.321371122980606e-4	0.9281694108802424	0.11506732003722897	8.066316401389567	9.548333228073286e-14	5.532304272345662e-10	7.983231593484398e-13
ENSMUSG00000020651	Slc26a4	-0.08104745048713716	0.016849932765762386	-4.809956906879688	8.538099145516027e-5	0.45132392083197714	4.33658173687293e-4	-0.5085913796155684	0.12387382506548397	-4.105721118619769	6.322176078822733e-5	0.2581383380022473	1.665329007151865e-4
ENSMUSG00000022974	Paxbp1	-0.08444502640900875	0.017463711834420227	-4.835456929755977	8.54135247870413e-5	0.45141047849951327	4.33658173687293e-4	-0.47498495265766943	0.12914623369882025	-3.677884666504281	3.15779197533459e-4	1	7.407583314688629e-4
ENSMUSG00000018921	Pelp1	-0.08600424967927102	0.01809237993159476	-4.753617268952087	8.556891819766477e-5	0.45214616375646066	4.341121678802114e-4	-0.14883180405736518	0.1336991589015039	-1.1131842958489326	0.26728656802238443	1	0.3346486575262625
ENSMUSG00000005417	Mprip	-0.08106893076826824	0.01724135078777533	-4.702005763130155	8.567977932545031e-5	0.452646274176354	4.343397133755494e-4	-0.4319404202409557	0.12347142472130856	-3.498302714299302	6.034738475888074e-4	1	0.0013483388513189653
ENSMUSG00000023861	Mpc1	-0.07485728631628209	0.013397960516018497	-5.5872150262559215	8.643801196579148e-5	0.4565655792033106	4.378461268167113e-4	0.5893308496331373	0.12665131749662728	4.6531758317384355	8.121004559418822e-6	0.035911082161750034	2.4750444650753058e-5
ENSMUSG00000002017	Fam98a	-0.07903375879216004	0.012392608265750903	-6.377491896567357	8.665621352963141e-5	0.45763146364998347	4.38613757711519e-4	0.9354143222124162	0.11535168200733838	8.109238685855551	2.438777371881634e-13	1.4040041329922567e-9	1.9474702799734405e-12
ENSMUSG00000030763	Lcmt1	0.0865862388180222	0.016313133964604595	5.307762383726671	8.683215919188306e-5	0.4584738005331426	4.391664930688628e-4	-0.038414083728965605	0.12909591708332765	-0.29756234431620665	0.7664170184439433	1	0.8103846989171054
ENSMUSG00000001962	Fam50a	0.07893793518048413	0.014789776866863022	5.337331042319317	8.736021250129918e-5	0.4611745617943584	4.414978481248453e-4	-0.45454329460193066	0.129760843113592	-3.5029311130787404	6.077080506799e-4	1	0.0013568778328719858
ENSMUSG00000026843	Fubp3	0.08410302205634658	0.016511165388672724	5.093705990859034	8.752827426243876e-5	0.4619742315571518	4.420077088617399e-4	-0.2284355185978293	0.129985772842744	-1.757388624939663	0.08095549029051757	1	0.11735781584305037
ENSMUSG00000032194	Kank2	-0.08551596215187243	0.019006735594649972	-4.499245108452159	8.791084304247625e-5	0.4639055187351471	4.4359919265298594e-4	-0.6651376226708827	0.12242839067576423	-5.4328707499914275	1.8326773233968348e-7	8.904979114385221e-4	7.002913349565142e-7
ENSMUSG00000028999	Rint1	-0.07967344330541935	0.014753058830298938	-5.400469436330781	8.828468504605757e-5	0.4657899983029997	4.451442357111562e-4	0.13856890601616037	0.13327237802060277	1.0397421286707949	0.30027501428980297	1	0.369724849181681
ENSMUSG00000032702	Kank1	-0.08231351385833942	0.01797952418887538	-4.5781808791842185	8.856392853571361e-5	0.4671747230258893	4.4621029844180366e-4	-0.6224663767457886	0.12006521310639919	-5.184402381347314	6.002150648706874e-7	0.002837216611643739	2.130213121277844e-6
ENSMUSG00000062515	Fabp4	0.06180707466118372	0.014260505924479418	4.334143191588064	8.984349097107489e-5	0.47383457138144897	4.5231076556210615e-4	-0.3397844941927679	0.1340698843118843	-2.534383436941987	0.012103799320403492	1	0.021136677157180195
ENSMUSG00000071650	Ganab	0.07988623554952014	0.017546683458833628	4.552782623391006	9.038915466272813e-5	0.47662201253656544	4.547099676458342e-4	0.6601358378050032	0.12270948318311899	5.379664396596671	2.276482317672332e-7	0.001099313311203969	8.549802311805904e-7
ENSMUSG00000060703	Cd302	0.05376275474534667	0.013437205835491	4.001036778297008	9.11326920231053e-5	0.48045155234581116	4.577772461543936e-4	0.4454515763793638	0.13201434964078732	3.3742663399201906	9.01641356194973e-4	1	0.0019502958986728869
ENSMUSG00000030264	Thumpd3	0.051498020922618425	0.012517691570421255	4.114018997265115	9.113802317055557e-5	0.48045155234581116	4.577772461543936e-4	1.068589834002109	0.11068925234927145	9.653961982056359	4.531725273243587e-18	2.7711500045884534e-14	6.385698829410333e-17
ENSMUSG00000018293	Pfn1	0.0793724079878485	0.0149358288806533	5.314228532081088	9.168474077289826e-5	0.48317858387317386	4.600257938366223e-4	0.22592059059998426	0.13217432083769584	1.7092623526880433	0.08941141296849277	1	0.1280363650343161
ENSMUSG00000024974	Smc3	-0.08641149290375993	0.018430103439640206	-4.688605963974279	9.172550782882194e-5	0.4833017007500628	4.600257938366223e-4	0.14971721899938117	0.13236557995573064	1.1310887547159447	0.2596218369432669	1	0.32621954563013095
ENSMUSG00000030870	Ubfd1	0.0766493557839765	0.014902918200422383	5.143244749327288	9.19967455710008e-5	0.4846388556680322	4.608964095662742e-4	-0.6586651443955958	0.12377547787021034	-5.32145103157077	4.0858068474909875e-7	0.0019513813503616957	1.4894520252903432e-6
ENSMUSG00000010205	Raver1	0.08998544082216285	0.0161859278199399	5.559486105659464	9.203919181916174e-5	0.48477042331152487	4.608964095662742e-4	-0.18299232919264335	0.1267442008127578	-1.4437925208347973	0.15075502623112155	1	0.20293945838804825
ENSMUSG00000070972	Dnajc25	-0.08467089308278178	0.017716758904264714	-4.779141237983438	9.274167882154635e-5	0.48837768067426307	4.640610240652281e-4	0.19560540063138607	0.13198171062696626	1.4820644444005284	0.14020425216844032	1	0.19037226150811748
ENSMUSG00000003458	Ncstn	-0.0778858783800183	0.015774073322433503	-4.937588204896379	9.305235755938e-5	0.4899206625501357	4.652617877969e-4	0.14726224211646338	0.12577520208610263	1.170836855548451	0.24368327251630173	1	0.3096058800298397
ENSMUSG00000003363	Pld3	0.08374544497600041	0.017257290346907674	4.852757489301135	9.324151445665787e-5	0.490823332099847	4.6585358020106966e-4	-0.13700569796503315	0.13316308799198318	-1.0288564198307064	0.3051468355328907	1	0.3743923508868955
ENSMUSG00000027613	Eif6	0.08495890993123845	0.016698586054286563	5.087790646168471	9.46388747485848e-5	0.4980843978018018	4.7247632461736575e-4	0.08636135829926357	0.13232056079820242	0.6526677167803902	0.5148726001052284	1	0.5811083548357466
ENSMUSG00000021614	Vcan	-0.08249429621013402	0.01748916966911324	-4.716878946850354	9.49114687936647e-5	0.4994241487922636	4.7335619911542296e-4	-0.5656359490894962	0.1289043979178658	-4.38802677197952	2.035596115779001e-5	0.0872049375999724	5.830280693590099e-5
ENSMUSG00000020458	Rtn4	-0.05474929037046435	0.013406489941442777	-4.083790060604958	9.495899435142224e-5	0.4995792692828324	4.7335619911542296e-4	-0.9451118800927683	0.117454265930296	-8.04663732395766	1.0616071715949188e-13	6.14670552353458e-10	8.831068507072776e-13
ENSMUSG00000005907	Pex1	-0.07390043114499877	0.014418672921994852	-5.125328214656144	9.597696366110282e-5	0.5048388288574008	4.7806844881911924e-4	0.756771219650279	0.12463075122332057	6.0721067009718395	1.3649869292738775e-8	6.964163313155323e-5	6.072761321583579e-8
ENSMUSG00000022986	Krt75	-0.06579047448827978	0.012363007740848768	-5.3215589496802345	9.61907308767985e-5	0.5058670536810833	4.7877080875138736e-4	-0.9191108967003842	0.11687318302310559	-7.864172712047021	8.130578911733159e-13	4.644186674381981e-9	6.156410729482645e-12
ENSMUSG00000030036	Mogs	-0.06282201735514518	0.015606254306947428	-4.025438527371603	9.736704425932643e-5	0.5119559187155384	4.84259373564904e-4	0.31753196356166097	0.13303616976815916	2.386809272358193	0.018021666019886865	1	0.03032026653307481
ENSMUSG00000024135	Srbd1	-0.055363326173707116	0.013903599246167136	-3.981942027634992	9.814334334728371e-5	0.5159395559766704	4.877516610461683e-4	-0.18893706463811055	0.13659644978429594	-1.3831769781459726	0.16827759899119188	1	0.22369022249738232
ENSMUSG00000023942	Slc29a1	-0.07648307698020387	0.014658733368230408	-5.217577471322603	9.930389202484075e-5	0.521941256482563	4.931468751120393e-4	-0.48660983956123427	0.12997948943978313	-3.743743275639429	2.550260277595938e-4	0.9731793219306101	6.068973825165017e-4
ENSMUSG00000062778	Chia1	0.05456389844610488	0.01372326129111593	3.9760154156234044	1.0042170670854354e-4	0.5277160687533963	4.983218930182628e-4	-0.42588376211172774	0.13482471255387016	-3.1587959955157547	0.0018506238244341525	1	0.0037982235697993525
ENSMUSG00000033688	1300017J02Rik	0.07130725488096258	0.013413967967507802	5.315895718081907	1.005605512591973e-4	0.5283451363158227	4.986348359348291e-4	0.6104594299759276	0.12643511286210235	4.828242852456113	3.485580357495224e-6	0.015761794376593405	1.113896005455006e-5
ENSMUSG00000034006	Pqlc1	-0.08032744246263422	0.016269857473873633	-4.937193985357595	1.0074839605956032e-4	0.5292313245008703	4.991900949336648e-4	0.10219292743577868	0.13460039718189956	0.7592319902122927	0.4489750383571346	1	0.5177454876252972
ENSMUSG00000000759	Tubgcp3	-0.08807180024700989	0.019256255124385654	-4.573672278338164	1.0083787546049549e-4	0.5296005219185224	4.992575022799551e-4	0.04609344521516786	0.13531350827739286	0.3406418605352855	0.7338039019082446	1	0.7820585802650226
ENSMUSG00000022614	Lmf2	-0.07521079755799907	0.01447630856683224	-5.195440343840155	1.0097210706737178e-4	0.5302045342107692	4.994497935405095e-4	-0.35420490589324777	0.13039132962879502	-2.71647591064235	0.007507945179017812	1	0.013688633770556166
ENSMUSG00000000805	Car4	-0.041993587346541184	0.010302101881288283	-4.07621549761745	1.010285220672368e-4	0.5303997408529931	4.994497935405095e-4	1.4445376862150159	0.08982684965060615	16.08135754324841	9.672995510307158e-37	6.317433367781605e-33	1.2729662091564218e-34
ENSMUSG00000030224	Strap	0.08131897714144168	0.014319598833038297	5.678858611165968	1.011873580665833e-4	0.5311324424914958	4.998594715301187e-4	0.38709574671388564	0.12919570129284158	2.9961967994312335	0.0031948606703099914	1	0.006256602146023733
ENSMUSG00000032562	Gnai2	0.05440571838696307	0.013692369878008887	3.9734332969154806	1.014300114932191e-4	0.5323047003164139	5.006822772883584e-4	-0.46143627573241736	0.13452121866825592	-3.4302118305244456	7.437164580543366e-4	1	0.001631762018672069
ENSMUSG00000045983	Eif4g1	0.0639368533648805	0.01590808457357287	4.019142158138567	1.0164217712840469e-4	0.5333165033927394	5.013534673949797e-4	0.2828282214014248	0.1353660420652396	2.089358727539037	0.03807269187851979	1	0.05967563424503578
ENSMUSG00000059796	Eif4a1	0.0702085920369633	0.013796457566860553	5.088885440100664	1.0181891029058212e-4	0.5341420033843938	5.018490110202474e-4	1.1195725509494545	0.10509102179786312	10.653360599185072	3.28778430141616e-20	2.0459881707712764e-16	6.042910810982774e-19
ENSMUSG00000018733	Pex12	-0.07540646005818741	0.015030954578636438	-5.0167445895527445	1.0198735104818982e-4	0.5349236562477556	5.023029714798571e-4	0.639614508343657	0.12750246479349064	5.016487401867945	1.5000442645205355e-6	0.006922704280762271	5.020494028761508e-6
ENSMUSG00000037408	Cnnm4	-0.06614073738873878	0.013315123903917384	-4.9673392351444665	1.0232136489489782e-4	0.5365732375088442	5.035711151895495e-4	-1.1160129464860735	0.1092224871077715	-10.217794668829383	6.476191783378503e-19	3.986096042669469e-15	1.0003131909537689e-17
ENSMUSG00000021061	Sptb	-0.07970593645849255	0.01614062393624669	-4.938219041179595	1.0323796753855264e-4	0.5412766638046315	5.074004758169592e-4	0.27144664232682475	0.13427900139266807	2.0215122209096674	0.045144378185957276	1	0.06925857040419653
ENSMUSG00000042557	Sin3a	-0.09127075307603766	0.020546931792532298	-4.442062396353	1.0328918606581215e-4	0.5414419133569873	5.074004758169592e-4	-0.1274809626104997	0.13353911407538488	-0.9546338800670398	0.3410666737088256	1	0.4118588205182735
ENSMUSG00000058952	Cfi	0.08160673980939412	0.0170108042212364	4.797347541482825	1.0333079598704032e-4	0.5415567017680784	5.074004758169592e-4	0.10552460319053818	0.132319095078439	0.7975009436694152	0.4262470561835686	1	0.49623241855765776
ENSMUSG00000038072	Galnt11	-0.07252155808320308	0.01580667678136191	-4.5880332144651215	1.0403158368438096e-4	0.5451254985061562	5.104607163633309e-4	-1.011073446345879	0.11202755876943628	-9.025220735433212	3.61189956060284e-16	2.1584711774162572e-12	3.928313902275485e-15
ENSMUSG00000031838	Ifi30	0.055053342102811126	0.013878935989958294	3.9666831911785883	1.0411160233430471e-4	0.5454406846294224	5.104726850668591e-4	0.26696309063142143	0.13635414466757037	1.9578656100426868	0.05174969510673636	1	0.0784050181446754
ENSMUSG00000064037	Gpn1	0.08244133248917598	0.016667374662676402	4.946269832992269	1.0429922694853826e-4	0.5463193507564434	5.110118490851688e-4	0.19281275142827706	0.133694507369133	1.4421890264789825	0.15127732670374117	1	0.2035592657894922
ENSMUSG00000029700	Slc13a1	0.08409445553240165	0.015355607619854685	5.476465511118437	1.0512197838516265e-4	0.5505238008030968	5.146596858440254e-4	-0.20703393779763274	0.13045589028439167	-1.5870033721459582	0.11504930603479954	1	0.1595213214353462
ENSMUSG00000000568	Hnrnpd	0.08630226424656882	0.014863341127791498	5.8063838745651015	1.0522906611898052e-4	0.550979390198982	5.148009331322616e-4	-0.49857891166614005	0.12615988340770193	-3.951960783404642	1.1633524539990801e-4	0.4621999299738345	2.9351453785712986e-4
ENSMUSG00000079260	Tmppe	-0.0735853564925061	0.01474795923604042	-4.989528063834175	1.0543952532121538e-4	0.5519759150565625	5.154473080338761e-4	0.7922405098337736	0.12268524810567208	6.457504240048451	1.4302979253181594e-9	7.5576942373811545e-6	7.256253160056661e-9
ENSMUSG00000025979	Mob4	-0.08404210855206698	0.017692590243622488	-4.750130274585486	1.0604991217963506e-4	0.5550652403482099	5.180463416050473e-4	-0.1312411468300469	0.13331907991892175	-0.9844138356629932	0.32640837423356883	1	0.39641327103301643
ENSMUSG00000026727	Rsu1	0.08001367899284181	0.017570955215071144	4.553746681012062	1.0688419701761673e-4	0.5593250029931883	5.217344335132924e-4	-0.685638211672207	0.12199660890622445	-5.620141558190677	7.723026427184703e-8	3.811313541815651e-4	3.08733377222815e-7
ENSMUSG00000010914	Pdhx	-0.054994440013686384	0.013889025936423575	-3.9595606103279732	1.0701423742450984e-4	0.5598984902050355	5.219819735013156e-4	0.3200804220839663	0.13645327373776783	2.3457144949053266	0.020049980915827367	1	0.0334015396542248
ENSMUSG00000030127	Cops7a	0.061653486315275736	0.014911923425749395	4.134509315465946	1.0751787946549673e-4	0.5624260274840134	5.240501088021989e-4	-0.14078410126562038	0.13558248682013938	-1.0383649434928963	0.30047285793531014	1	0.36983004212763576
ENSMUSG00000037148	Arhgap10	-0.05931584694273616	0.014012452272308773	-4.233081104579772	1.077257288944621e-4	0.5634055621180367	5.24674534511888e-4	0.6204350323413481	0.13006588506397018	4.7701596159223465	3.7549189253684743e-6	0.01693092943448645	1.1924404695426913e-5
ENSMUSG00000030399	Ckm	0.07858391816826593	0.015238325196279516	5.15699180559898	1.0800274255701773e-4	0.5647463408306457	5.256346494269058e-4	-0.38999887584512916	0.13309904790951468	-2.930140237443801	0.0038926403916835274	1	0.007516417344763007
ENSMUSG00000041444	Arhgap32	-0.0862603257636818	0.018024251185872177	-4.785792478929423	1.0830400744485734e-4	0.5662133509217142	5.267112852824548e-4	0.22216972600771706	0.13265043781584435	1.6748510571533157	0.09599919409206326	1	0.13622486459473285
ENSMUSG00000028149	Rap1gds1	0.07112093319753039	0.014230727469042524	4.997701863959283	1.089644619281166e-4	0.5695572424982654	5.295318755443185e-4	-0.7988205671487404	0.11930735643920298	-6.695484595334286	6.349339685388237e-10	3.3880076561231635e-6	3.355715271474265e-9
ENSMUSG00000072664	Ugt3a1	-0.05274097337373207	0.012427913295879259	-4.243751313522558	1.1042839290771376e-4	0.5770987813357121	5.362500555961303e-4	1.0388623187417418	0.11695377442629103	8.882674576667679	6.035126854887645e-16	3.5987461435695028e-12	6.425749952291377e-15
ENSMUSG00000016554	Eif3d	0.0545569723703685	0.012388913376464483	4.4036931014475975	1.1058953327239337e-4	0.5778303113482554	5.366365257613189e-4	0.8650222605879688	0.12158503320843213	7.1145455798417965	2.442259817005509e-11	1.3544772945112554e-7	1.5526637290721015e-10
ENSMUSG00000061048	Cdh3	-0.06133396136107477	0.015381671474099386	-3.9874705076332373	1.1115847762232394e-4	0.5806918870990203	5.389690886994211e-4	-0.4412237066804201	0.13081094376595487	-3.3729877178307914	9.087364161463837e-4	1	0.0019643513857566376
ENSMUSG00000031980	Agt	0.07862387478953298	0.017001047825227766	4.624648762699404	1.1123404596562523e-4	0.5809754220784605	5.389690886994211e-4	-0.6337525105704607	0.12338653477175025	-5.136318251767293	7.25900639267745e-7	0.0034117330045584015	2.5393015451258703e-6
ENSMUSG00000024064	Galnt14	-0.059169590781612415	0.01381470078159079	-4.283088842608933	1.1242305863724556e-4	0.5870732122036963	5.443294524158026e-4	0.6722853786676308	0.12923821527566856	5.2019085626772865	5.267833652058404e-7	0.0024969531510756838	1.8827998604315208e-6
ENSMUSG00000010517	Faf1	0.08114810129985085	0.016691771969201227	4.861563017370536	1.1260574577007826e-4	0.5879145986655786	5.448130935052316e-4	0.13157885130482008	0.13168110911589048	0.99922344357701	0.31921357269972805	1	0.38947252148418515
ENSMUSG00000047719	Ubiad1	-0.056675103718147796	0.013616365767163217	-4.162278297108001	1.126949153267134e-4	0.588267458005444	5.448438962893271e-4	0.7818830168148675	0.12529495196779505	6.240339331594439	2.966161970219851e-9	1.546853467469652e-5	1.4287954439272781e-8
ENSMUSG00000046598	Bdh1	-0.06065405273573183	0.014948661976226392	-4.057490418352694	1.130693086053295e-4	0.5901087216112146	5.462526069185522e-4	-0.3933726731995224	0.13231645025418093	-2.972968761207321	0.003348108198931254	1	0.006543080471923865
ENSMUSG00000039115	Itga9	0.059073572004491946	0.013854626889885065	4.263815436821338	1.1344788900714061e-4	0.5919710848392596	5.470664928470428e-4	-0.5477553419529624	0.13153785474056	-4.164241107879804	4.805984985481814e-5	0.19826855233726265	1.2875969545794112e-4
ENSMUSG00000022890	Atp5j	-0.08116653510349499	0.016729907193424962	-4.851583105935838	1.134502195628229e-4	0.5919710848392596	5.470664928470428e-4	0.0522335424031039	0.13245436773548822	0.3943512267365501	0.6939163525423135	1	0.7460734640079122
ENSMUSG00000024122	Pdpk1	-0.05459606633960626	0.013841703747988597	-3.944316923235687	1.1348719798422697e-4	0.5919710848392596	5.470664928470428e-4	-0.3080242245351381	0.13598835506298487	-2.2650779501853116	0.024667247743517286	1	0.04037574381899098
ENSMUSG00000027363	Usp8	0.04153341145521157	0.009635653504777878	4.310388645110272	1.136216284453907e-4	0.5925367923427125	5.471476564277979e-4	1.4131338063114143	0.09271767389374819	15.241256029900248	2.0744216276027735e-34	1.3508633638949261e-30	1.9500506162062064e-32
ENSMUSG00000020340	Cyfip2	-0.07400078678067253	0.016707489492675996	-4.42919846294753	1.1367034138857137e-4	0.5926771600000111	5.471476564277979e-4	-0.9569672566641271	0.11552511480990557	-8.283629566080059	2.5064159366160033e-14	1.466253322920362e-10	2.2561172179115322e-13
ENSMUSG00000031158	Timm17b	-0.08172984687788355	0.01712167711957838	-4.77347203238792	1.1382146481995975e-4	0.5933512961064502	5.474745895579935e-4	0.5244080682351481	0.12561380369560796	4.1747646580778115	4.9225736121556184e-5	0.20285925855693304	1.3166883889424377e-4
ENSMUSG00000025224	Gbf1	-0.08545630188181437	0.018962520137318147	-4.506589908038478	1.1545041051812911e-4	0.6017275396204889	5.549040914604015e-4	0.3442194116137127	0.13176882179133292	2.6122978632897946	0.00980058054716871	1	0.01742914054064057
ENSMUSG00000040462	Os9	-0.07462182941845194	0.014833494875447228	-5.030630343356767	1.1562503214751862e-4	0.6025220425207195	5.553377456428267e-4	0.41134312600053047	0.1313105405115751	3.1325979193899545	0.0021905191899899592	1	0.004443161612248438
ENSMUSG00000001380	Hars	0.08076410795174042	0.017338800936145045	4.657998453824847	1.1652345649069e-4	0.6070872083164949	5.592445978911307e-4	0.2866145340156733	0.12998146784953726	2.2050415244383132	0.028738257356661145	1	0.04625678410147513
ENSMUSG00000066043	Phactr4	0.07812817264894271	0.015612653642437831	5.0041571688093525	1.1666046931382773e-4	0.6076843846557287	5.594940875255004e-4	-0.474730425494845	0.13009217156447983	-3.649185187592523	3.621812966393665e-4	1	8.409149371513873e-4
ENSMUSG00000056050	Mia3	-0.07518113008571176	0.015398519698954638	-4.882360873351715	1.1711558562053281e-4	0.6099379699117349	5.612677009345272e-4	0.7090803946023135	0.1270916111209829	5.579285590512463	9.541829302796587e-8	4.690763285254802e-4	3.7708850938379305e-7
ENSMUSG00000007659	Bcl2l1	-0.07918400533971108	0.017487292252719742	-4.528088408163696	1.1861250545486646e-4	0.6176153159034896	5.680278645509617e-4	-0.35506107724093067	0.11823722968873673	-3.002954975988868	0.0030790924956301037	1	0.006044280614930215
ENSMUSG00000028967	Errfi1	0.08014708163642363	0.017089292159480844	4.689900604921159	1.1916070345456447e-4	0.6203506221844627	5.702381299862067e-4	0.11490745561301477	0.13026907610318877	0.8820777658850842	0.3790986724446427	1	0.4500215162702054
ENSMUSG00000028649	Macf1	-0.0880679424669152	0.020381559935659627	-4.320961827501304	1.193090990544467e-4	0.6210038605783951	5.705333370481535e-4	-0.2211854196188183	0.12888253513317205	-1.7161783742868753	0.08787545141730647	1	0.1261388460571284
ENSMUSG00000059654	Reg1	0.06013998466117995	0.014913289835269601	4.03264372418688	1.1964438194705227e-4	0.62262936365246	5.717211570164154e-4	-0.48152236630326867	0.1313988424383894	-3.664586060025955	3.2476192513221044e-4	1	7.607452714026147e-4
ENSMUSG00000022035	Ccdc25	0.0803330845091517	0.016447907950991394	4.884091323256077	1.2030806313821438e-4	0.6259628525081294	5.736478522652265e-4	-0.14331988208208188	0.13322126034446582	-1.0758033793668096	0.2835492435653403	1	0.3521619521819439
ENSMUSG00000040990	Sh3kbp1	0.08059394422288164	0.017936463541159398	4.493301817158106	1.2037521118494911e-4	0.6261918485841053	5.736478522652265e-4	-0.5621420632452553	0.12336702211935377	-4.556663957580173	9.766726450945142e-6	0.042993129837060516	2.9492914202486938e-5
ENSMUSG00000040111	Gramd1b	-0.074353516513809	0.015226000396369512	-4.88332553383736	1.2037818237065972e-4	0.6261918485841053	5.736478522652265e-4	-0.7755399358969752	0.12021468494459601	-6.451291173406997	1.2882495524311234e-9	6.82256962967523e-6	6.596639731515013e-9
ENSMUSG00000015478	Rnf5	-0.050973950635572716	0.01297399484241282	-3.9289325496674015	1.2039630455596926e-4	0.6261918485841053	5.736478522652265e-4	0.7696755385539884	0.12746351528234012	6.038398806506365	8.34783224450621e-9	4.2916205569006425e-5	3.8144955672813104e-8
ENSMUSG00000057880	Abat	0.050607325615901096	0.01288190377302536	3.9285595132198217	1.205686996718956e-4	0.6268366695941853	5.740535773090254e-4	-0.8068673582366045	0.12655876300111796	-6.375436509516746	1.416661670794008e-9	7.488473591817126e-6	7.194591109071908e-9
ENSMUSG00000002660	Clpp	0.062674221498422375	0.013289701992692825	4.715999014340803	1.2080137769912203e-4	0.6279255612800363	5.747455280261916e-4	0.66302713355279	0.1268606551997685	5.226420536049698	4.729386010207583e-7	0.002250714802257789	1.7079780432033972e-6
ENSMUSG00000050608	Minos1	-0.0629172898891616	0.015937825870989287	-3.9476708051934706	1.212869590314739e-4	0.6303283260865699	5.766388659155334e-4	0.16712473472344555	0.133836486545301	1.2487232670059456	0.21337375003724882	1	0.27567234935108914
ENSMUSG00000005980	Dnase1	0.05355925045818851	0.012433600419297567	4.307621980119442	1.2159443443875591e-4	0.6318046813437758	5.776833058534396e-4	0.9229827189898872	0.11927542356652664	7.738247254893105	6.57450436732444e-13	3.763246299856509e-9	5.047869164176758e-12
ENSMUSG00000003809	Gcdh	0.05334086403563798	0.013596590084505469	3.923105992319697	1.2311593261197124e-4	0.6395872699191906	5.844897810871362e-4	0.4683838665661199	0.1335802263739587	3.5063862315585266	5.699978129226144e-4	1	0.00127882095326473
ENSMUSG00000019877	Serinc1	-0.055015436491876096	0.014032342943933164	-3.920616586388507	1.2429561111795606e-4	0.6455914041466638	5.896648314031369e-4	-0.07647234095512119	0.13786129723390797	-0.554704927992744	0.5797665095463448	1	0.6430990614994857
ENSMUSG00000026781	Acbd5	-0.05114420383667312	0.012405971799712156	-4.122547162154582	1.2446875809263503e-4	0.6463662607750537	5.9006082726912e-4	1.1003648919586497	0.11429539663515682	9.627377167876084	5.260148877712676e-18	3.21184690473136e-14	7.286690445336718e-17
ENSMUSG00000020329	Polrmt	-0.07583954502210959	0.015804007799685927	-4.798753960600851	1.249155567993201e-4	0.64856157090207	5.917526016843242e-4	0.6386408820411473	0.12833339304390445	4.9764201420487675	1.8468697131733328e-6	0.008482672592605118	6.112878628108919e-6
ENSMUSG00000025499	Hras	-0.04175409095818319	0.010655560379183044	-3.9185260532852855	1.252945620084516e-4	0.6504040713858723	5.931210201551162e-4	-1.252216292171399	0.1046859660213421	-11.961644332690328	8.514450364649252e-25	5.4143389868804594e-21	2.5236524053780214e-23
ENSMUSG00000052142	Rasal3	-0.06219271305594951	0.015830139298909016	-3.9287533660702354	1.2594957518301857e-4	0.6536782951998664	5.95793101872223e-4	-0.10836359866230778	0.13165964582087775	-0.8230585612370239	0.4115552240041406	1	0.4819422270772815
ENSMUSG00000057103	Nat8f1	-0.0670215683919388	0.014012599294987809	-4.782950470574853	1.2764313323460313e-4	0.6623402183543556	6.0337055796242e-4	1.1671324872473385	0.1088194841969774	10.725399921347515	2.4394624927966212e-20	1.519053294264456e-16	4.534368136328183e-19
ENSMUSG00000070953	Rabepk	0.0784245726661205	0.015445245044794654	5.077586819676331	1.2780921267404346e-4	0.6630741953529375	6.036799982602105e-4	-0.43216360565823647	0.13221315799161384	-3.2686883228796955	0.0013229596402862317	1	0.0027801628637480905
ENSMUSG00000113949	Scamp4	-0.08109600091417517	0.01663561109626891	-4.874843517612867	1.278920847378014e-4	0.6633762435349759	6.036799982602105e-4	-0.05587574713465178	0.13559777572648066	-0.4120697912284405	0.6808132857381528	1	0.7340244830668599
ENSMUSG00000044033	Ccdc141	-0.07581399795017753	0.01689884358726196	-4.486342367670929	1.2818195697016053e-4	0.6647516288472525	6.046145353861335e-4	-0.7785523288875952	0.11723794556718911	-6.640787887582067	4.033892222719006e-10	2.1690238481560095e-6	2.2045690054394566e-9
ENSMUSG00000027540	Ptpn1	-0.07986685103408059	0.014083450540881195	-5.670971812074355	1.2886744846030233e-4	0.6681777202666676	6.074124719690467e-4	0.4055733085630942	0.12933671025624463	3.1357942208330782	0.0020905413309052667	1	0.004252167529321995
ENSMUSG00000026986	Hnmt	0.060275805533206155	0.013737758522560789	4.387601182115584	1.295697443134156e-4	0.6716895545207464	6.102855530295451e-4	-0.39144041663475865	0.1343267639305003	-2.914091020887595	0.004011901600814844	1	0.0077310686553423895
ENSMUSG00000037286	Stag1	-0.08133799565492834	0.017779799462883744	-4.574742016901014	1.3048991958847442e-4	0.6763292532270629	6.141800220973975e-4	-0.16962921210703705	0.1316861987833405	-1.2881320417344804	0.19954157113410026	1	0.25989381196800865
ENSMUSG00000036940	Kdm1a	-0.0836173523532044	0.01911181393089135	-4.375165677918705	1.3163394292481384e-4	0.6821270922363853	6.191217615763223e-4	-0.49536390950583903	0.12542519495298557	-3.9494768949055366	1.1364385837072352e-4	0.45207526859873814	2.8727490898169836e-4
ENSMUSG00000079508	Apoo	-0.07706421372457159	0.015089745768756773	-5.1070584558245224	1.3183114148742126e-4	0.6830171440463295	6.193115654630759e-4	-0.05978187592957785	0.13255403511209157	-0.45100004597388943	0.6527350956084803	1	0.7084799119571825
ENSMUSG00000031119	Gpc4	-0.0746964653132633	0.015340413979762626	-4.869260074193847	1.3186253848233577e-4	0.6830479493384993	6.193115654630759e-4	0.6001948770266242	0.12773079880880514	4.698904904877567	6.101524498850525e-6	0.02720059621587564	1.891098973265966e-5
ENSMUSG00000010660	Plcd1	0.07388385240797912	0.015574775646560358	4.743814876350797	1.322911526139849e-4	0.6851358793878278	6.20881443794594e-4	-0.9203462039820884	0.11709167420872797	-7.860048207539304	3.697581563720078e-13	2.1246303665135567e-9	2.9137828370392953e-12
ENSMUSG00000015202	Cnksr3	-0.07303274889440169	0.014217734723761127	-5.1367359367274625	1.3242449366326965e-4	0.6856940281884103	6.210642682140516e-4	-0.42010384224525815	0.13053669383759556	-3.218281617948141	0.0015835173959905782	1	0.0032858859872652176
ENSMUSG00000057147	Dph6	0.054635928223742296	0.01399647651780109	3.9035487363019454	1.32677743422683e-4	0.6868726776992299	6.215117028033789e-4	-0.06708579889732996	0.13750892613996674	-0.48786504833180855	0.6262231141302503	1	0.6851593101059273
ENSMUSG00000034902	Pip5k1c	0.06111230549482172	0.015526896718313178	3.9358995299262145	1.3270880584175494e-4	0.6869007790369236	6.215117028033789e-4	0.032958182128862444	0.13169598322751458	0.2502595851532141	0.8026693587559319	1	0.8404781000340599
ENSMUSG00000019731	Slc35e1	-0.07945974430960134	0.016899336592087758	-4.701944592712844	1.333084399473404e-4	0.6898711767274865	6.235255559482215e-4	0.1918148838995213	0.133999005020007	1.4314649864070408	0.1541068280943619	1	0.20686062654299245
ENSMUSG00000025162	Csnk1d	-0.08231108792662327	0.016739396353619113	-4.917207657182174	1.333283369633963e-4	0.6898711767274865	6.235255559482215e-4	-0.2855756036922937	0.132849879307703	-2.149611314518787	0.033046878907217435	1	0.05248575023159322
ENSMUSG00000009647	Mcu	-0.07746950654100629	0.016095113388005015	-4.813231486690919	1.339881938755453e-4	0.6931209269181958	6.261664174013409e-4	0.1452008535123864	0.13240816382134263	1.0966155660032024	0.274864205192035	1	0.34260399131721736
ENSMUSG00000032264	Zw10	-0.08215977400157078	0.01780012969589537	-4.615684009342721	1.3425158465882244e-4	0.6943491958554296	6.269520419127407e-4	0.3074061421653103	0.1336964041186053	2.299285042046478	0.02280306398605343	1	0.03760505288928109
ENSMUSG00000060579	Fhit	0.04597386500692532	0.0117957650684021	3.897489034439808	1.357808068050444e-4	0.7021225519888846	6.336437650902073e-4	-1.086678562529233	0.1158879511920284	-9.37697622014723	2.4431701652132902e-17	1.47982816906969e-13	3.067950321966307e-16
ENSMUSG00000003518	Dusp3	0.07261308725952849	0.013740250189545769	5.2846990599032875	1.3729531524107156e-4	0.70981677979634	6.402573878711912e-4	-0.14530093947636952	0.13378092342636058	-1.0861110519718464	0.2793661430608822	1	0.3474256702590446
ENSMUSG00000026219	Trip12	-0.07718513286271293	0.015855508142294698	-4.868032747359321	1.37672839266644e-4	0.7116309061692829	6.415632311434261e-4	0.3618563407698454	0.13398340895762847	2.700754844088797	0.0076445743980144394	1	0.013910757615855921
ENSMUSG00000024608	Rps14	-0.04935528903730339	0.012656749185379302	-3.8995233542525396	1.3851058983859694e-4	0.715822728285869	6.450103900481018e-4	1.1022003292614522	0.10461046932106485	10.5362334804047	1.502287400201131e-20	9.366761940254051e-17	2.856951183041457e-19
ENSMUSG00000001249	Hpn	-0.0517560952907941	0.012887449958709048	-4.0160074690197725	1.3869096397612962e-4	0.7166162108646618	6.453935947404051e-4	1.0639338369366969	0.11517955845333043	9.237175860226898	6.506074935083565e-17	3.9283680458034567e-13	7.883972941592976e-16
ENSMUSG00000003360	Ddx23	-0.08071516055412037	0.018542775437890086	-4.352916898793261	1.414928231997728e-4	0.7309519246500263	6.579666266109577e-4	-0.4823306711903802	0.12842598493254906	-3.7557093406268702	2.3237740948029302e-4	0.8909349879474434	5.566229903095479e-4
ENSMUSG00000018740	Slc25a35	-0.08432878855032644	0.018571682661400097	-4.5407187968808955	1.4191341999639462e-4	0.7329828142813782	6.594564290792914e-4	-0.026021410065418166	0.13324787688568507	-0.19528573868191718	0.8454062812373504	1	0.8768558213338219
ENSMUSG00000037815	Ctnna1	-0.06982178890204237	0.015408335210926964	-4.531429771369953	1.4286754863471944e-4	0.7377680211496912	6.634216443305956e-4	-1.0339311343135522	0.11316332437265333	-9.1366274368960525	2.1884879562311922e-16	1.3111231345781072e-12	2.440720466440889e-15
ENSMUSG00000020069	Hnrnph3	0.06057351556979326	0.015448425286367957	3.921015536984518	1.4300806389795718e-4	0.7383506339051529	6.636058254221145e-4	-0.3206314377556932	0.1314925458388514	-2.4384001063348335	0.01571445190505556	1	0.02678091000654379
ENSMUSG00000074268	Amy2a5	0.07163018414823563	0.013902733988422006	5.152237265554257	1.433256463268163e-4	0.7398469863390257	6.645451638250961e-4	-0.3780890015754537	0.13240034073417653	-2.8556497625225337	0.004942943796994401	1	0.009362282724301427
ENSMUSG00000029328	Hnrnpdl	0.07551367772117329	0.015726671531743137	4.801631264998092	1.435029243202313e-4	0.7406185924167137	6.645451638250961e-4	-0.5257448134480389	0.1281853176376906	-4.1014433098651	6.736147686302077e-5	0.2745653796936727	1.7694152405535996e-4
ENSMUSG00000074743	Thbd	0.07184349498823547	0.013901197717301915	5.1681514391250305	1.4351347686861117e-4	0.7406185924167137	6.645451638250961e-4	-0.46692457551088373	0.13109030077506834	-3.561854483132643	5.010289772310408e-4	1	0.0011340800379017022
ENSMUSG00000057440	Mpp7	-0.08062077007957658	0.014214141617078405	-5.6718704689638155	1.4406279947283942e-4	0.7432199824803786	6.666197050149671e-4	-0.6458815112391325	0.12377141476288725	-5.218341508630792	5.851815414606175e-7	0.0027679086911087205	2.0802239561376895e-6
ENSMUSG00000038005	Hpf1	0.05275415743177832	0.013591883514484471	3.8812985246349236	1.4441330454247197e-4	0.7448838248300704	6.677719914894347e-4	-0.5298849665383452	0.13353398649433137	-3.9681655618125293	1.0351698864520053e-4	0.4139644375921569	2.638039447271183e-4
ENSMUSG00000025196	Cpn1	0.0760207407878511	0.015694725000402657	4.8437128261820925	1.44694795785511e-4	0.7461910618658802	6.686037614246225e-4	0.1518708361124911	0.13223362851329246	1.148503885282288	0.25267257285131994	1	0.318930659766293
ENSMUSG00000028837	Psmb2	0.05997107150477872	0.014237560769166985	4.212173171871738	1.451890026550727e-4	0.7485944976895548	6.704165876985111e-4	-0.25713540836737575	0.13597918404978349	-1.8909909642731466	0.06020489461689694	1	0.09005415016576082
ENSMUSG00000022307	Oxr1	0.05204862458917099	0.013318636852612082	3.907954332350694	1.4653105703933027e-4	0.7553675990377475	6.7574825334495e-4	-1.0389096643626279	0.1127953117106006	-9.210574877687849	7.931593514735624e-17	4.785130367440002e-13	9.523701702000075e-16
ENSMUSG00000015405	Ace2	0.061451632874793785	0.013123281068359458	4.682642439393844	1.4654905129532578e-4	0.7553675990377475	6.7574825334495e-4	1.1818208401432688	0.10485790061914138	11.270689506132761	2.4584653052536398e-21	1.5417035929245575e-17	5.2182908737319195e-20
ENSMUSG00000032109	Nlrx1	-0.06175775912164131	0.0158790958347111	-3.88924909607518	1.4716758268434722e-4	0.7583545535724412	6.781251358984626e-4	0.2037084852943238	0.13237071145295642	1.5389241551876096	0.1255642076217505	1	0.1728116473857181
ENSMUSG00000097239	Gm27029	0.06526041271739698	0.013040911552672944	5.004283055966345	1.4735910977645603e-4	0.7591941335683015	6.785324998803923e-4	0.967198678142181	0.11567651025596185	8.36123665904187	3.327523422282878e-14	1.9416099169020593e-10	2.935000552094013e-13
ENSMUSG00000019558	Slc6a8	0.08545329035697515	0.01812642152414144	4.714294558535191	1.4795858600668692e-4	0.7621346765204443	6.808164307160839e-4	0.016305816373155747	0.13220365389783253	0.12333862107742453	0.9019973422344273	1	0.9230392709024156
ENSMUSG00000029276	Glmn	0.060306495576202934	0.01468373711141583	4.107026373369067	1.4865572436882103e-4	0.76557698049942835	6.835462378384644e-4	0.159523389665423	0.134425966412664	1.1867007091153383	0.23689117347609817	1	0.30214070972528123
ENSMUSG00000025510	Cd151	-0.061820057241431664	0.01252548036484975	-4.93554382272773	1.4880610231467575e-4	0.7662026208182654	6.837598835408984e-4	-1.0825603014384826	0.10500640869013884	-10.309468869019096	2.1413052080854763e-18	1.312620092556397e-14	3.124121567450651e-17
ENSMUSG00000038224	Serpinf2	0.07580218423839075	0.015792269120893564	4.7999551969452305	1.493816188735495e-4	0.7690165739610327	6.858608904473368e-4	0.7157697738799996	0.12074013011581769	5.928184549688749	1.7088107999155225e-8	8.684176485170686e-5	7.500984031650527e-8
ENSMUSG00000039047	Pigk	-0.05915186032637826	0.013905660102199515	-4.25379736680188	1.4947181107925243e-4	0.7693314116249123	6.858608904473368e-4	0.4364820204359059	0.13379908175424923	3.2622198501899957	0.0013187254972826172	1	0.002774045323567654
ENSMUSG00000089992	G6pd2	0.07736822812664983	0.014940239303641656	5.1785133125539335	1.4975669551933876e-4	0.7706479551425173	6.866892379911142e-4	-0.2682859976283116	0.13201568891987395	-2.032228137605266	0.044250154588433364	1	0.06814266816167618
ENSMUSG00000030614	Tmem126b	-0.08039685413421323	0.017730430057067537	-4.534399553504693	1.5025565635837495e-4	0.7730653519638391	6.884973668789047e-4	0.36832027006115103	0.12942586576306545	2.8458010915331227	0.0050130357454122405	1	0.009467788520325069
ENSMUSG00000029298	Gbp9	0.05424684565082409	0.014025895804390152	3.8676207500304294	1.521095930708887e-4	0.7824517467566514	6.965073920712927e-4	-0.17691903277704565	0.13779795706153625	-1.2839017105169357	0.20078201626563189	1	0.2613542368007632
ENSMUSG00000055817	Mta3	-0.08146294596778034	0.018289664244146332	-4.454042724915129	1.529358743816974e-4	0.7865492019450697	6.998039314544986e-4	-0.3071561440135024	0.13000498757738727	-2.3626489239935	0.019317700267110022	1	0.032310744219009646
ENSMUSG00000044041	Krt13	-0.048633550921714355	0.01259100503927674	-3.8625630575164944	1.5505283561267628e-4	0.7972816807203814	7.089976777841626e-4	-0.847407933340032	0.12370081711435338	-6.850463506289197	1.0569916387388251e-10	5.776459305707679e-7	6.232083318012069e-10
ENSMUSG00000004207	Psap	0.06620445630312928	0.014432501510114883	4.587178200309247	1.5749324718853118e-4	0.8096727837962387	7.196566434031495e-4	1.0783036888712823	0.11060041936482763	9.749544306105921	7.174409497221774e-18	4.372802588556671e-14	9.713500924222073e-17
ENSMUSG00000063358	Mapk1	0.06769904935088115	0.013349863472533537	5.0711417004501564	1.5776783923272868e-4	0.8109266936562254	7.204110910141254e-4	-0.865696995469709	0.12227701260078654	-7.079801649195185	5.355149019414336e-11	2.9501515947953576e-7	3.287022439155441e-10
ENSMUSG00000028024	Enpep	0.06199085625548192	0.015528765260237356	3.9920016315923363	1.588255289111304e-4	0.8162043930742992	7.247378503711776e-4	-0.074957683255382	0.13762457447839271	-0.5446533334579028	0.5866602536491453	1	0.6496897534716939
ENSMUSG00000005506	Celf1	0.07911867085417101	0.017016867573983692	4.6494262536973565	1.609931326504781e-4	0.8271827155581565	7.341197594179805e-4	0.1105046335813791	0.1332291406341235	0.8294329082617827	0.408121026556999	1	0.47877274999911806
ENSMUSG00000024054	Smchd1	-0.07800865159075314	0.01720210943319289	-4.5348305621303044	1.6133962593750632e-4	0.82880165844097	7.351902622360052e-4	-0.5298342035433776	0.12938219111665664	-4.09510921843684	6.733242646869217e-5	0.274514302712858	1.7693584910702655e-4
ENSMUSG00000028179	Cth	0.0448155249165423	0.011635714175522982	3.851549139185349	1.6165024944530314e-4	0.8302356811510769	7.360959455709997e-4	-1.121660176078422	0.11431552499036546	-9.811967151206765	1.4622436566293862e-18	8.973789320734543e-15	2.1670187523921985e-17
ENSMUSG00000002524	Puf60	-0.07638998740562199	0.016199065165491158	-4.715703444934308	1.6419190587253066e-4	0.8431254366554449	7.471526560451256e-4	-0.22981974043289827	0.13304409809945597	-1.7273952299717834	0.08616474952723935	1	0.12392656871895845
ENSMUSG00000028737	Aldh4a1	0.06154793888827435	0.014225310771698958	4.3266498620700125	1.6434403407880174e-4	0.8437422709605681	7.473280886237149e-4	-0.10292744166990309	0.13681725194329344	-0.7522987065444302	0.4528404207344312	1	0.5213805719042095
ENSMUSG00000034088	Hdlbp	-0.07237510154727604	0.015733029480456316	-4.600201228706838	1.6473327145146054e-4	0.845575882360347	7.485807501040126e-4	0.6812111517426884	0.1204070471613469	5.657568786898803	7.464792600217946e-8	3.6853681067275997e-4	2.987733291328107e-7
ENSMUSG00000015176	Nolc1	0.08344225986752224	0.01850633952527423	4.508847346800517	1.6506289284691145e-4	0.8471027660903495	7.490832054731334e-4	0.11709221152873654	0.13395336383352957	0.8741266973650083	0.3833344741243607	1	0.454230297089554
ENSMUSG00000021546	Hnrnpk	0.078145405904374	0.01729955004036433	4.517192974501679	1.6517512983269076e-4	0.8475135911715362	7.490832054731334e-4	-0.3888371466251621	0.12526583070310207	-3.1040958611192364	0.002259607475462609	1	0.004567808660074951
ENSMUSG00000003226	Ranbp2	-0.07958283259664586	0.018081235200794247	-4.40140464480823	1.651853694743946e-4	0.8475135911715362	7.490832054731334e-4	-0.27658016840650357	0.12715575521357217	-2.1751289821051083	0.031050279445513133	1	0.04956594826576333
ENSMUSG00000026827	Gpd2	-0.0790491304913655	0.017180093262247863	-4.60120496930426	1.660096945010297e-4	0.8514637230957814	7.523028855487434e-4	0.02893369255190588	0.13366922822387037	0.2164573921489805	0.8288849103646082	1	0.8631894655302771
ENSMUSG00000039678	Tbc1d13	0.059671918523110414	0.014977060923500898	3.9842208580107763	1.6670022618877492e-4	0.8548387598960377	7.548302690154485e-4	0.2415451026423179	0.13435898938354013	1.7977591506944512	0.07387018141304001	1	0.1081347705668083
ENSMUSG00000062210	Tnfaip8	0.0737215736855975	0.0169604743247273	4.346669336842549	1.6679684060007024e-4	0.8551674017565601	7.548302690154485e-4	0.7192056874089271	0.11768667563674536	6.111190442908298	5.8698390306608595e-9	3.032945827142466e-5	2.7315092518916868e-8
ENSMUSG00000020368	Canx	-0.06019156172276104	0.015581060648402775	-3.8631235113593707	1.6698222601055476e-4	0.8559508905301038	7.551498605838147e-4	0.20141977710248188	0.13089882858165403	1.5387439237230243	0.12560790621954337	1	0.1728356384200325
ENSMUSG00000038503	Mesd	0.07873035425709858	0.015445115268307783	5.0974274318720925	1.6726616976851214e-4	0.8572391200636247	7.557875270578319e-4	-0.28119586520486317	0.13300687241084894	-2.1141453829262957	0.03611595662380382	1	0.05692047774482135
ENSMUSG00000027202	Slc12a1	-0.06897620971194636	0.015082869577299133	-4.573148985903903	1.6735295241994847e-4	0.8575165281998159	7.557875270578319e-4	-0.9456739335626907	0.11177428864302186	-8.460567676551523	1.620465861714711e-14	9.497550415509922e-11	1.480925745844833e-13
ENSMUSG00000075419	Dolk	-0.05248763798498447	0.013661607539791771	-3.841981101572801	1.675968874594929e-4	0.8585988544549822	7.563700407979858e-4	0.4376393953074014	0.13421899288390154	3.260636858495551	0.0013233237217718874	1	0.0027801628637480905
ENSMUSG00000073640	Rpl27-ps3	-0.05596826436437114	0.014455457140263016	-3.8717740865131023	1.679431276585936e-4	0.8602046998673164	7.574131459859806e-4	0.7209725083047949	0.1223279538045267	5.893767416864252	1.80271477821067e-8	9.150580214197361e-5	7.881636704735022e-8
ENSMUSG00000017188	Coa3	-0.05819114508614643	0.014960732562027425	-3.889591959811129	1.681574338772513e-4	0.8611342188854039	7.578602156933654e-4	0.6978875440020268	0.1283500354791908	5.437377102362969	1.725571265201496e-7	8.39662977647048e-4	6.620559139956759e-7
ENSMUSG00000024646	Cyb5a	-0.05960332685289502	0.012926549800342272	-4.61092308260916	1.698187345118107e-4	0.8694719207004707	7.648235955425834e-4	1.330040276734734	0.09556369819920957	13.917840161042815	7.06034979367412e-29	4.544747162188031e-25	3.2261876140538685e-27
ENSMUSG00000061742	Slc22a12	0.07890404744555866	0.01752320279765209	4.502832521925211	1.7035461503881944e-4	0.8720452743837167	7.667122892992009e-4	0.4965597343448185	0.12903825977445027	3.8481589507853693	1.7293645342088095e-4	0.6735874860743313	4.236492418128804e-4
ENSMUSG00000030588	Yif1b	-0.07214286006463926	0.014572769263408966	-4.9505251034053	1.7120728287216782e-4	0.8762388737397548	7.700231861236256e-4	0.43380732731367305	0.13255012449245085	3.272779478516293	0.001319990940492882	1	0.0027758198748619894
ENSMUSG00000029032	Arhgef16	0.06086237486550792	0.015126294980893193	4.0236141726963766	1.7179583708645417e-4	0.879079298371386	7.721424918229976e-4	0.2078343520917518	0.13606221855085765	1.5274949527158195	0.1283778076491469	1	0.17631516892744453
ENSMUSG00000046934	Csl	0.07584788434047145	0.01602525080998197	4.7330232293916135	1.7285557824396977e-4	0.8843291382961493	7.763752251503898e-4	0.43959202081222354	0.1292450534419501	3.401228976315636	8.583437024327887e-4	1	0.0018646092974604655
ENSMUSG00000024835	Coro1b	0.0686302467782112	0.01449318977609548	4.735344519631375	1.7316656469687866e-4	0.8857469784245343	7.772414704675727e-4	-0.8954446362415474	0.11872145936541607	-7.542399167158428	4.086245808154973e-12	2.3046426357994048e-8	2.8573323504420534e-11
ENSMUSG00000042380	Smim12	-0.07577054858036779	0.015259101171851882	-4.965597103461113	1.7402219769659704e-4	0.8899495190203973	7.805494620610828e-4	0.14861928957500248	0.13567936129451438	1.0953713826261302	0.275064860518295	1	0.3427242534009432
ENSMUSG00000075706	Gpx4	-0.07881939138343182	0.017106340938910915	-4.607612561032582	1.751659694681855e-4	0.8956236018908325	7.85144468052221e-4	0.34595788348479933	0.12723006494915737	2.719151983637265	0.007239755887527061	1	0.01324370134554575
ENSMUSG00000014349	Ube2z	0.07781881578306318	0.014236299849092256	5.466224834258821	1.755129500510601e-4	0.8972222006610192	7.861642010455925e-4	-0.4373783390354143	0.13021965845905878	-3.358773507864226	0.0010075845813750546	1	0.0021602823543329618
ENSMUSG00000021773	Comtd1	-0.07678195751809344	0.016168123405168152	-4.748971515986205	1.7699873167043332e-4	0.9046405175675847	7.922800370009873e-4	-0.2994069690031125	0.13198299258432958	-2.2685268998716523	0.024710523895892664	1	0.040415580636626314
ENSMUSG00000060681	Slc9a6	-0.05317227102649753	0.013894070783593792	-3.8269756829858457	1.7734248729363005e-4	0.9062201100704496	7.932679840172618e-4	-0.285896156731816	0.13650283703436142	-2.094433807700629	0.037583463816937376	1	0.05897905841055281
ENSMUSG00000051397	Tacstd2	0.057678684015754135	0.015041492570974454	3.834638334167489	1.7746055812665798e-4	0.9066459914690956	7.932679840172618e-4	-0.7605544084230927	0.12449525884166647	-6.109103394775609	5.975275246622777e-9	3.085632137356002e-5	2.774686741198156e-8
ENSMUSG00000052102	Gnpda1	0.0698451670921592	0.013683197002851427	5.104447964726682	1.780044274783137e-4	0.9092466155592264	7.951589496315711e-4	-0.012952706406923734	0.13437182144474102	-0.09639451387693213	0.923351211639956	1	0.939775865829994
ENSMUSG00000052738	Suclg1	0.06025695128265225	0.015296081649438732	3.9393717073197827	1.785602061883772e-4	0.9119069730040423	7.971005133782374e-4	0.4016794670668968	0.13445790753890718	2.9873993610280265	0.0032030621507364277	1	0.006270797069873756
ENSMUSG00000033880	Lgals3bp	0.052987960076877734	0.013857676603445872	3.8237261261892677	1.795226088744786e-4	0.9166424409130878	8.008534009451316e-4	-0.37578367910037147	0.13614528100063206	-2.7601667596442576	0.006358656193147526	1	0.011749496700620815
ENSMUSG00000030095	Tmem43	-0.07891186643108275	0.017278073033689237	-4.567168241343715	1.8163832279790716e-4	0.9272636378833161	8.097426585435156e-4	0.11144698632406953	0.13480770688885363	0.8267107934411749	0.409719760584644	1	0.4801346437483451
ENSMUSG00000028745	Capzb	0.05764015582681871	0.01506683224900292	3.825632015690171	1.8240548868903424e-4	0.9309976142688308	8.121486951209809e-4	-0.34392052190576183	0.12442857642602845	-2.7639994909868566	0.006299596686402424	1	0.011650181617911171
ENSMUSG00000015533	Itga2	0.053199802302812745	0.013928627078258414	3.819457725726164	1.8242488926881607e-4	0.9309976142688308	8.121486951209809e-4	-0.2569106487000414	0.13684233669091178	-1.8774207961701943	0.06203435150184896	1	0.09249626849811152
ENSMUSG00000024818	Slc25a45	-0.07930581467651344	0.017248352396217543	-4.597877690271722	1.831506179064459e-4	0.934434452558687	8.148283068454455e-4	0.5151937636588233	0.12690106664191875	4.05980640897656	7.802507794917449e-5	0.31568946538236	2.025266323098888e-4
ENSMUSG00000042473	Tbc1d8b	0.06063496425194925	0.015741358377861715	3.851952467915658	1.854009080635089e-4	0.9457300320319588	8.242824155796543e-4	-0.14028429465968936	0.13424526950468715	-1.0449850127105698	0.2974172325880586	1	0.36682387824356616
ENSMUSG00000030663	1110004F10Rik	0.07600487602482618	0.016600440971284547	4.57848536411168	1.8685411223536079e-4	0.95295597240034	8.301823487567008e-4	-0.40432903753874994	0.12633757913214938	-3.2003861425571634	0.0016812898135526305	1	0.0034756163911958244
ENSMUSG00000054604	Cggbp1	0.08142386076693395	0.017832006427226932	4.5661637179880845	1.8761055246979276e-4	0.9566262070434733	8.329807255406453e-4	-0.15584817466064937	0.13068556389750077	-1.192543154826834	0.23472085523476593	1	0.2996048937817187
ENSMUSG00000015932	Dstn	0.06950969897843585	0.014063163345874452	4.942678774959057	1.8887569796897623e-4	0.9628883082458408	8.380324292891866e-4	-0.49585442538715513	0.13140310573305317	-3.7735365737434607	2.334496612540765e-4	0.8948125515868752	5.589879079519008e-4
ENSMUSG00000025290	Rps24	-0.05913032700605995	0.013054253077619723	-4.529583320813144	1.8917325511070212e-4	0.9642160812992487	8.386956249640601e-4	1.1095105257934317	0.10397064542262262	10.671382497275689	8.007112118470425e-20	4.969213780722746e-16	1.4049812730542773e-18
ENSMUSG00000004032	Gstm5	0.06680294073139417	0.013255390596852518	5.0396810447257945	1.892800916522233e-4	0.9645713470597299	8.386956249640601e-4	-0.5710735563324185	0.12963357182634117	-4.405290607107827	2.1279155506075882e-5	0.0909683897884744	6.0718492294006637e-5
ENSMUSG00000040606	Kazn	-0.07637444889837441	0.016405271022960573	-4.655482301479925	1.900287291810449e-4	0.9681963751774239	8.414461897787857e-4	-0.408202181060914	0.13211929073502174	-3.089648595522691	0.0023803425577259073	1	0.004790133906284011
ENSMUSG00000062031	Pgghg	0.053202842208537146	0.013975706833388116	3.8068086890199337	1.91288929076861e-4	0.9744258047175299	8.457253646332477e-4	-0.2739656954948455	0.13730487357028884	-1.9953093314972359	0.04747674213258358	1	0.0725492250888063
ENSMUSG00000036083	Slc17a3	0.04454454191296801	0.011664945447357373	3.818666972253978	1.91289647477472e-4	0.9744258047175299	8.457253646332477e-4	1.3560418259666809	0.09702266081398946	13.976547484782612	1.3786033873592602e-30	8.90853508911554e-27	7.622865788927674e-29
ENSMUSG00000027088	Phospho2	0.053023260114209256	0.013929001416593409	3.8066806462553338	1.913807094132076e-4	0.9745105723320531	8.457253646332477e-4	0.21929637312995803	0.1368460143923956	1.6025046407354053	0.11075008617833143	1	0.15433557162470807
ENSMUSG00000021134	Srsf5	-0.058486208463210364	0.014018489480348215	-4.172076352819547	1.9246107946948066e-4	0.979819355579126	8.494955049414849e-4	-0.01671376888452213	0.137123764549143	-0.12188820033840435	0.9031209661491372	1	0.9239017346488374
ENSMUSG00000026288	Inpp5d	0.05944300124288201	0.014952928027330678	3.975341895194922	1.9249206654525138e-4	0.979819355579126	8.494955049414849e-4	0.009837658499401164	0.1355962731223377	0.07255109799754915	0.942242868875319	1	0.9533996735659849
ENSMUSG00000028639	Ybx1	0.05794986835013225	0.01284853934287734	4.510230058349557	1.953751559798733e-4	0.9942641687815752	8.616411034501113e-4	1.3063430649530006	0.09887220352677871	13.212440082810417	1.1280295306845341e-27	7.234053380279917e-24	4.4181156618477585e-26
ENSMUSG00000030122	Ptms	0.07047172563750147	0.015363922515704629	4.586831622293524	1.9607426524789667e-4	0.9976258615812982	8.637393036710263e-4	0.9151408079469875	0.11777007276414773	7.770571813942023	1.0618513854542882e-12	6.057862154016714e-9	7.976006982065315e-12
ENSMUSG00000022216	Psme1	0.050526558270361004	0.01329591826657806	3.8001556009387913	1.961134528395917e-4	0.997629134595003	8.637393036710263e-4	-0.6721601308228735	0.1306262644428137	-5.145673679714967	6.766644462461241e-7	0.0031877662062654907	2.3809904044382333e-6
ENSMUSG00000036327	Qsox2	-0.06230853950679047	0.01633036593429954	-3.815501732016948	1.9851273068975368e-4	1	8.737215839054041e-4	0.14019682507872536	0.13673833173085287	1.025292785893278	0.30659318395623314	1	0.37581653323994296
ENSMUSG00000002778	Kdelr1	-0.07872208130311022	0.017488958667797268	-4.501244630880316	1.991545756450833e-4	1	8.759606335191499e-4	-0.0551794286887034	0.13420976523008638	-0.4111431727348972	0.6814924983460862	1	0.7345160752034803
ENSMUSG00000031387	Renbp	0.0776837290038888	0.01578688361376335	4.920776696938617	1.994829882783177e-4	1	8.768190132741019e-4	-0.186372589846106	0.13599610386197628	-1.3704259501085214	0.17249991299538608	1	0.22865621021547952
ENSMUSG00000025934	Gsta3	0.04836330825213271	0.010012273191969925	4.8304023796435365	1.9963831808890382e-4	1	8.769159766521944e-4	-1.485033918312547	0.08975361007553925	-16.545673394782664	5.4459103576558665e-36	3.5529119173346874e-32	6.286682483048351e-34
ENSMUSG00000047635	2810006K23Rik	0.06060814711562967	0.015555678526447705	3.8962072282854088	2.021193273742525e-4	1	8.872215971464852e-4	0.24572165547609848	0.1364992860784665	1.800168063405442	0.07349534993573849	1	0.10774398391746838
ENSMUSG00000026694	Mettl13	0.07294272977402631	0.01498809223876333	4.8667120946437965	2.046562278900399e-4	1	8.977586530109751e-4	-0.19572567856149678	0.13476139094630402	-1.4523868979616286	0.1484469128055691	1	0.20024204310386318
ENSMUSG00000054405	Dnajc8	0.06769537032659234	0.01443368136935622	4.690097321277623	2.0599964634095437e-4	1	9.03049748783131e-4	-0.8513656810735541	0.12292017071708011	-6.9261674150543175	9.494291829295721e-11	5.196225918173548e-7	5.638306880574535e-10
ENSMUSG00000025579	Gaa	0.06690969323870219	0.01349785947684629	4.957059551070042	2.0671768775667166e-4	1	9.055941314506654e-4	-0.5020836804815081	0.1311659499613677	-3.827850754173524	1.9554262783599296e-4	0.7567499697252927	4.7461102588005667e-4
ENSMUSG00000068739	Sars	0.06374208982241461	0.013269887324812574	4.803514021044253	2.0714060391739084e-4	1	9.068430963249713e-4	0.8796593914228038	0.11990555621933716	7.336268803204478	1.1988090172276778e-11	6.701342406302719e-8	7.959801547283673e-11
ENSMUSG00000020437	Myo1g	0.077205748973234	0.016156952080580714	4.7784847406973965	2.0824228053389175e-4	1	9.110381182924291e-4	-0.20510315854430125	0.1306180182035011	-1.570251649544654	0.11891007995992228	1	0.16444479321906025
ENSMUSG00000050199	Lgr4	-0.0760318357162734	0.016585218004871068	-4.584313314057306	2.0837573982220454e-4	1	9.110381182924291e-4	0.15708890926220273	0.13562214549633356	1.1582836172315938	0.2483845394803413	1	0.3150289648767629
ENSMUSG00000038525	Armc10	-0.07582363025454063	0.016182131359427882	-4.685639275222233	2.0943585430544816e-4	1	9.150650208033525e-4	0.044991769079697284	0.132753621595023	0.33891180172054947	0.7351776096133952	1	0.7826352809021421
ENSMUSG00000028955	Vamp3	-0.0784970853037088	0.017356796038025337	-4.522556186737292	2.0983696184264606e-4	1	9.162091631881958e-4	0.2672999365756377	0.1357767969955864	1.9686716912634687	0.050736064550259176	1	0.07704668930087824
ENSMUSG00000036644	Tbc1d9b	0.07868562357913494	0.01799849840952256	4.371788234150929	2.1015981794422715e-4	1	9.170103462022643e-4	-0.29786354622885713	0.13106482776803216	-2.272642869191704	0.02431160351745039	1	0.03988290978429907
ENSMUSG00000020444	Guk1	0.05281498471047602	0.013968204356607006	3.7810861984915305	2.1058841853871562e-4	1	9.182715665902908e-4	-0.2888876058127494	0.13723116519630996	-2.1051166139957647	0.0366312217716293	1	0.05759921216210496
ENSMUSG00000029752	Asns	0.05897634800317623	0.01415983182363147	4.165045795582832	2.113926945561597e-4	1	9.205611183974489e-4	-0.23658025958231754	0.13611328596803043	-1.738112910137841	0.08387420669867977	1	0.12108211497966498
ENSMUSG00000063457	Rps15	-0.06265522675130758	0.01365065475539038	-4.589906335926212	2.1149564185908546e-4	1	9.205611183974489e-4	1.0688863957471826	0.10657635554177429	10.029301436641973	3.3535667908779044e-18	2.0527182326963652e-14	4.797058583473176e-17
ENSMUSG00000048120	Entpd1	0.07117758780932444	0.016135096929181875	4.411351733536408	2.115331931636691e-4	1	9.205611183974489e-4	-0.7946277714162259	0.11710123473839734	-6.785818895858905	1.9614022237751158e-10	1.0644529868427553e-6	1.11837319171926e-9
ENSMUSG00000028854	Slc9a1	-0.04702627625986593	0.012444423393234873	-3.7789035919037195	2.123082279053376e-4	1	9.233232912208336e-4	-0.8928556434864164	0.12226072005039515	-7.302882259472924	8.112401773650482e-12	4.555113595904746e-8	5.525838889298154e-11
ENSMUSG00000033444	Specc1l	-0.057543263972843484	0.01400661635485296	-4.10829157556715	2.1396590279665846e-4	1	9.299178602391101e-4	-0.3122337339167105	0.1340754256810552	-2.3287916658155274	0.020962321064036688	1	0.03479618380458159
ENSMUSG00000024896	Minpp1	0.05287254265252587	0.014001186825397622	3.776290061112325	2.1438508278100692e-4	1	9.311246499663534e-4	0.1704813518949639	0.13755520273954983	1.2393668032881113	0.2167796454148219	1	0.27957860972746534
ENSMUSG00000028164	Manba	0.06672018005423769	0.013652040922302768	4.887194554569473	2.1515326515038588e-4	1	9.338446468928357e-4	-0.646893746248003	0.12873670585883323	-5.024936298722425	1.4702608303955872e-6	0.006791134775597217	4.9308441712553335e-6
ENSMUSG00000037062	Sh3glb1	0.08089266244906948	0.017650730612390964	4.582963970470556	2.1656331990081978e-4	1	9.393451845401412e-4	-0.04065626704887732	0.13071862810775223	-0.31102121891429346	0.7562000691944047	1	0.8012554678420585
ENSMUSG00000054693	Adam10	-0.07969092088529013	0.017522580964406557	-4.547898568547949	2.1683444141495936e-4	1	9.399015971741982e-4	-0.018606186551976486	0.13279277653910165	-0.14011444776514465	0.8887415601137332	1	0.9127391080924557
ENSMUSG00000028607	Cpt2	0.05269183772420969	0.013972340900849216	3.7711531731241372	2.1852331035113667e-4	1	9.465986715671359e-4	0.23345953899742383	0.13727180483557586	1.7007100567888769	0.09067773806904782	1	0.12962405311630126
ENSMUSG00000039163	Cmc1	0.05081829474378718	0.013477097642384434	3.7707150376329954	2.1887974565843482e-4	1	9.475188989687506e-4	-0.5988678005872939	0.13240626824406737	-4.522956567912539	1.0875172526816833e-5	0.047611505322404095	3.248235825077383e-5
ENSMUSG00000022827	Rabl3	-0.07368932010600368	0.01595055643887937	-4.619858898864899	2.19439815251903e-4	1	9.49113325832174e-4	0.3775749924921353	0.13324344737593258	2.833722782831088	0.005256889796162503	1	0.009899924115268823
ENSMUSG00000027889	Ampd2	0.058433423595813425	0.015471180189443271	3.7769208864676886	2.1953654740373385e-4	1	9.49113325832174e-4	-0.3867749080065038	0.12809425826230328	-3.0194554639169757	0.002897097883792451	1	0.005727575597914568
ENSMUSG00000062380	Tubb3	-0.07837711761891963	0.017675627085276424	-4.4341916267404615	2.1995224693851985e-4	1	9.50286135821051e-4	0.03672974246048927	0.13578205270565383	0.2705051347258052	0.7871319326475513	1	0.8281532883041152
ENSMUSG00000037461	Ints7	-0.08154954200132711	0.01776619563156435	-4.590152202109152	2.202609315122042e-4	1	9.509953604660785e-4	-0.1885549314670418	0.1348092851027724	-1.398679114152235	0.16372807303002712	1	0.21848118445296663
ENSMUSG00000041035	Gm17018	0.05268301501666009	0.013992034579678054	3.7652147524832866	2.2340145079734037e-4	1	9.639223254075406e-4	-0.2558511258302345	0.13746528614667972	-1.8612053486524114	0.06430172558247381	1	0.09546600955159695
ENSMUSG00000042286	Stab1	0.07614457126427429	0.016791586659706332	4.534685899992609	2.242802587296164e-4	1	9.670800147056855e-4	-0.5192738464630203	0.13007731336004272	-3.9920400648629277	9.794758878514153e-5	0.39276983102841756	2.506787764318286e-4
ENSMUSG00000033684	Qsox1	0.06880834600325991	0.013851685750676463	4.96750700541265	2.261856780626177e-4	1	9.746573422737553e-4	-0.0039168246752995855	0.1350348000287352	-0.029006038994881998	0.9769024341942806	1	0.9810182470111078
ENSMUSG00000024354	Slc23a1	0.053253406549539584	0.011596586994313672	4.59216203661061	2.2644894897067537e-4	1	9.751531964836674e-4	-1.3757330262037633	0.09829061833964774	-13.996585324652804	1.645720889671617e-27	1.0549070902795064e-23	6.332656990666222e-26
ENSMUSG00000033157	Abhd10	0.05877825861386593	0.01497893561728966	3.9240611025806302	2.2739745132201834e-4	1	9.78597272530334e-4	-0.1871349269126096	0.1363499713266504	-1.372460331981258	0.17160425897411216	1	0.22751481443676363
ENSMUSG00000028207	Asph	-0.07146271708862166	0.015863138329043715	-4.504954543438674	2.2789458586620445e-4	1	9.797353053268144e-4	-0.6505532464818065	0.1258623985485657	-5.168765683666688	7.613128886510944e-7	0.003572080073550935	2.651899845063103e-6
ENSMUSG00000001036	Epn2	0.06372897773007881	0.013853224712726429	4.60029913984817	0.00022808355737081694	1	9.797353053268144e-4	-1.112202374291763	0.10927193778175855	-10.178298260923034	1.2730247364678748e-18	7.816371881912751e-15	1.899433733777464e-17
[truncated: 5,049 more rows]
